# Supplementary material for: Convergent mosaic brain evolution is associated with the evolution of novel electrosensory systems in teleost fishes
Source: eLife journal article supplement (doi:10.7554/elife.74159), 2022-06-17
Supplement: supp [file elife-74159-supp-v1.zip]

**A**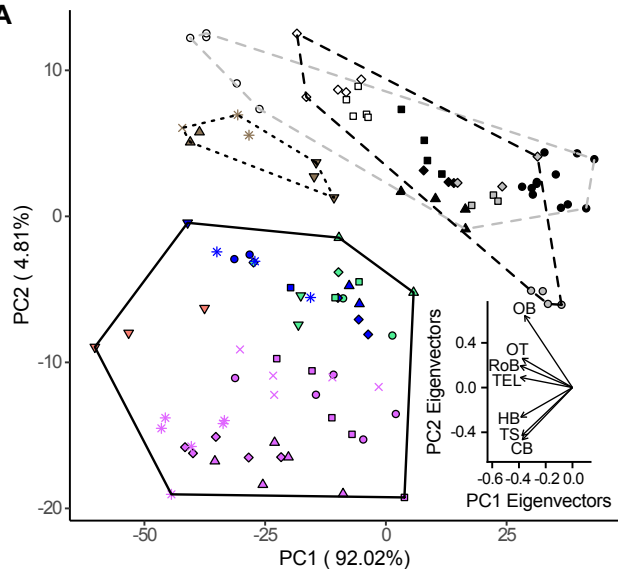

- *Apteronotus albifrons*
- *Eigenmannia limbata*
- ◆ *Eigenmannia virescens*
- ▲ *Sternarchella calhamazon*
- ▼ *Sternarchella orthos*
- \* *Sternopygus macrurus*
- *Brachyhyopomus gauderio*
- *Electrophorus* spp.
- ◆ *Gymnotus carapo*
- ▲ *Gymnotus javari*
- ▼ *Steatogenys elegans*
- *Corydoras sterbai*
- *Kryptopterus vitreolus*
- ◇ *Microglanis iheringi*
- ▲ *Synodontis multipunctatus*
- × *Synodontis ocellifer*
- ▼ *Synodontis petricola*
- \* *Synodontis soloni*
- *Danio rerio*
- *Devario aequipinnatus*

**B**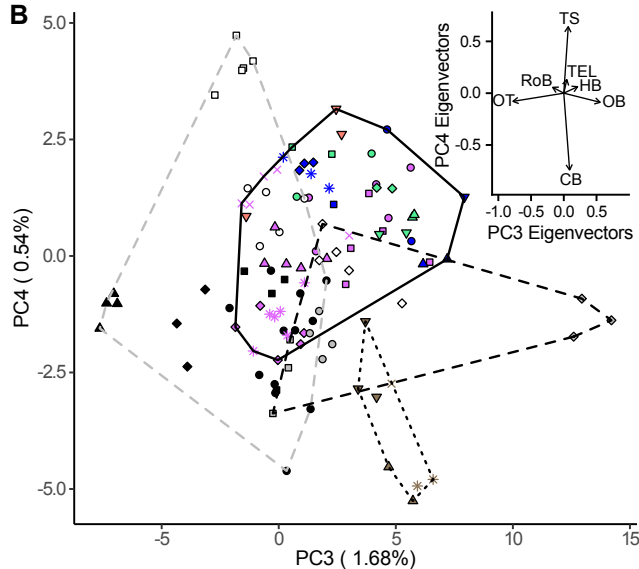

- ◆ *Gymnocorymbus ternetzi*
  - ▲ *Phenacogrammus interruptus*
  - *Brevimyrus niger*
  - *Brienomyrus brachyistius*
  - ◇ *Campylomormyrus* spp.
  - ▲ *Gnathonemus petersii*
  - \* *Mormyrus tapirus*
  - × *Petrocephalus tenuicauda*
  - ▼ *Gymnarchus niloticus*
  - *Chitala ornata*
  - *Pantodon buchholzi*
  - ◇ *Xenomystus nigri*
- Legend for line styles and symbols:
- ⚡ +A+T
  - ... ⚡ +A
  - - ✂ +A
  - - ✂
