# Supplementary material for: Convergent mosaic brain evolution is associated with the evolution of novel electrosensory systems in teleost fishes
Source: eLife journal article supplement (doi:10.7554/elife.74159), 2022-06-17
Supplement: supp [file elife-74159-supp-v1.zip]

Archive with 36 entries (36 files):
- elife_poa_e74159_Supplementary_file_1.csv
- elife_poa_e74159_Supplementary_file_2.csv
- elife_poa_e74159_Supplementary_file_3.xlsx
- elife_poa_e74159_Figure_2_video_1.avi
- elife_poa_e74159_Transparent_Reporting_File.pdf
- elife_poa_e74159_Figure_2_figure_supplement_1.pdf
- elife_poa_e74159_Figure_4_figure_supplement_1.pdf
- elife_poa_e74159_Figure_4_figure_supplement_2.pdf
- elife_poa_e74159_Figure_5_figure_supplement_1.pdf
- elife_poa_e74159_Figure_5_figure_supplement_2.pdf
- elife_poa_e74159_Figure_7_figure_supplement_1.pdf
- elife_poa_e74159_Figure_7_figure_supplement_2.pdf
- elife_poa_e74159_Figure_7_figure_supplement_3.pdf
- elife_poa_e74159_Figure_7_figure_supplement_4.pdf
- elife_poa_e74159_Figure_3_source_data_1.xlsx
- elife_poa_e74159_Figure_3_source_data_2.xlsx
- elife_poa_e74159_Figure_3_source_data_3.xlsx
- elife_poa_e74159_Figure_3_source_data_4.xlsx
- elife_poa_e74159_Figure_4_source_data_1.xlsx
- elife_poa_e74159_Figure_4_source_data_2.xlsx
- elife_poa_e74159_Figure_4_source_data_3.xlsx
- elife_poa_e74159_Figure_5_source_data_1.xlsx
- elife_poa_e74159_Figure_5_source_data_2.xlsx
- elife_poa_e74159_Figure_5_source_data_3.xlsx
- elife_poa_e74159_Figure_5_source_data_4.xlsx
- elife_poa_e74159_Figure_5_source_data_5.xlsx
- elife_poa_e74159_Figure_5_source_data_6.xlsx
- elife_poa_e74159_Figure_6_source_data_1.xlsx
- elife_poa_e74159_Figure_6_source_data_2.xlsx
- elife_poa_e74159_Figure_6_source_data_3.xlsx
- elife_poa_e74159_Figure_7_source_data_1.xlsx
- elife_poa_e74159_Figure_7_source_data_2.xlsx
- elife_poa_e74159_Figure_7_source_data_3.xlsx
- elife_poa_e74159_Figure_7_source_data_4.xlsx
- elife_poa_e74159_Figure_7_source_data_5.xlsx
- elife_poa_e74159_Figure_9_source_data_1.xlsx
