# Supplementary material for: Convergent mosaic brain evolution is associated with the evolution of novel electrosensory systems in teleost fishes
Source: eLife journal article supplement (doi:10.7554/elife.74159), 2022-06-17
Supplement: supp [file elife-74159-supp-v1.zip › elife_poa_e74159_Figure_3_source_data_1.xlsx]

## Sheet: Sheet1
Grade	N	OUrjMCMC		PGLS
		Slope	Intercept	Slope	Intercept
Ancestral	552	0.527838	-1.88056	0.533682	-1.93003
Osteoglossiforms	26	0.721523	-1.54054	0.727078	-1.53267
Percomorph A	270	0.465794	-1.45075	0.467584	-1.54931
Percomorph B	16	0.385277	-1.68161	0.378979	-1.79304
Isichthys henryi + Brienomyrus brachyistius	2	0.461139	-1.65357	-	-
Arothron nigropunctatus	1	0.597441	-1.65349	-	-
Gymnothorax meleagris	1	0.813142	-1.64857	-	-
Synodontis multipunctatus	1	0.736578	-1.65095	-	-
Synodontis petricola	1	0.784754	-1.65649	-	-
