# Supplementary material for: Convergent mosaic brain evolution is associated with the evolution of novel electrosensory systems in teleost fishes
Source: eLife journal article supplement (doi:10.7554/elife.74159), 2022-06-17
Supplement: supp [file elife-74159-supp-v1.zip › elife_poa_e74159_Figure_3_source_data_2.xlsx]

## Sheet: Sheet1
	Ancestral	Osteoglossiforms	Percomorph A	Percomorph B
Ancestral	-	0.0013	<.0001	<.0001
Osteoglossiforms	0.006	-	<.0001	<.0001
Percomorph A	0.7802	0.0403	-	0.0462
Percomorph B	0.4442	0.0024	0.0503	-
