# Supplementary material for: Convergent mosaic brain evolution is associated with the evolution of novel electrosensory systems in teleost fishes
Source: eLife journal article supplement (doi:10.7554/elife.74159), 2022-06-17
Supplement: supp [file elife-74159-supp-v1.zip › elife_poa_e74159_Figure_3_source_data_3.xlsx]

## Sheet: Sheet1
Model	loglik	AIC	deltaAIC
- Synodontis petricola	528.567	-1023.13	0
All shifts	528.678	-1019.36	3.777
- Synodontis multipunctatus	523.364	-1012.73	10.405
- Percomorph B	522.879	-1011.76	11.375
- Isichthys henryi + Brienomyrus brachyistius	522.466	-1010.93	12.2
- Percomorph A	516.886	-999.771	23.3616
- Osteoglossiforms	515.152	-996.303	26.8296
- Gymnothorax meleagris	514.997	-995.993	27.1398
- Arothron nigropunctatus	509.793	-985.585	37.5478
No shifts	446.392	-886.785	136.348
