# Supplementary material for: Convergent mosaic brain evolution is associated with the evolution of novel electrosensory systems in teleost fishes
Source: eLife journal article supplement (doi:10.7554/elife.74159), 2022-06-17
Supplement: supp [file elife-74159-supp-v1.zip › elife_poa_e74159_Figure_3_source_data_4.xlsx]

## Sheet: Sheet1
Model	Marginal ln L	2 ln Bayes factor
Fitted shifts in intercept + slope	463.692	0
Fixed shift at osteoglossiforms	449.238	28.9092
Fixed shifts at ampullary electroreceptor taxa	448.135	31.1132
Fixed shifts at electrogenic taxa	447.213	32.9584
Fixed shifts at tuberous electroreceptor taxa	446.954	33.4758
Fitted shifts in intercept	442.579	42.226
Single allometric relationship	442.575	42.235
