# Supplementary material for: Convergent mosaic brain evolution is associated with the evolution of novel electrosensory systems in teleost fishes
Source: eLife journal article supplement (doi:10.7554/elife.74159), 2022-06-17
Supplement: supp [file elife-74159-supp-v1.zip › elife_poa_e74159_Figure_4_source_data_1.xlsx]

## Sheet: Sheet1
	PC1	PC2	PC3	PC4	PC5	PC6	PC7
OB	-0.9056	0.3734	0.1904	-0.0171	0.0491	-0.0361	0.0108
TEL	-0.9849	0.0525	0.0159	0.0255	-0.1615	-0.0145	0.0109
HB	-0.9782	-0.1532	0.0723	0.0121	0.0253	0.1036	0.0538
OT	-0.9502	0.1515	-0.266	-0.0153	0.0346	-0.0228	0.0385
TS	-0.9569	-0.2488	0.0233	0.1246	0.0453	-0.0642	-0.0122
CB	-0.9504	-0.2707	0.0304	-0.1441	0.004	-0.0377	-0.0158
RoB	-0.986	0.1131	-0.058	0.0109	0.01	0.0655	-0.0842
