# Supplementary material for: Convergent mosaic brain evolution is associated with the evolution of novel electrosensory systems in teleost fishes
Source: eLife journal article supplement (doi:10.7554/elife.74159), 2022-06-17
Supplement: supp [file elife-74159-supp-v1.zip › elife_poa_e74159_Figure_4_source_data_2.xlsx]

## Sheet: Sheet1
Candidate model variables	df	logLik	AICc	DAICc	Lambda
PC1 (92.02%)
~ body mass	29	-113.218	235.975	0.676	0.116
~ body mass + electric organ	28	-111.45	235.299	0	0.185
~ body mass + electroreceptor type	27	-112.595	240.69	5.391	0.109
~ body mass + electric organ + electroreceptor type	26	-110.262	239.393	4.094	0.208
PC2 (4.81%)
~ body mass + total brain	28	-79.176	170.751	28.799	1
~ body mass + total brain + electric organ	27	-69.507	154.514	12.562	1
~ body mass + total brain + electroreceptor type	26	-61.541	141.952	0	1
~ body mass + total brain + electric organ + electroreceptor type	25	-60.765	144.075	2.123	1
PC3 (1.68%)
~ body mass + total brain	28	-62.66	137.721	0.641	1
~ body mass + total brain + electric organ	27	-62.99	141.48	4.401	1
~ body mass + total brain + electroreceptor type	26	-59.105	137.079	0	1
~ body mass + total brain + electric organ + electroreceptor type	25	-58.28	139.106	2.027	1
PC4 (0.54%)
~ body mass + total brain	28	-68.946	147.43	19.759	1
~ body mass + total brain + electric organ	27	-61.331	138.162	10.491	0.796
~ body mass + total brain + electroreceptor type	26	-56.394	131.657	3.986	0.576
~ body mass + total brain + electric organ + electroreceptor type	25	-54.401	127.671	0	0
