# Supplementary material for: Convergent mosaic brain evolution is associated with the evolution of novel electrosensory systems in teleost fishes
Source: eLife journal article supplement (doi:10.7554/elife.74159), 2022-06-17
Supplement: supp [file elife-74159-supp-v1.zip › elife_poa_e74159_Figure_4_source_data_3.xlsx]

## Sheet: Sheet1
	DA1	DA2	DA3
Coefficients
Intercept	-1.692	-0.577	-0.145
OB	-2.041	-1.063	-0.711
TEL	0.115	1.642	-0.898
HB	-3.163	3.301	0.827
OT	0.837	1.173	-0.702
TS	1.588	-0.423	3.992
CB	-1.094	-2.67	-1.722
RoB	4.852	-2.74	-0.227
Means
Not E	-5.482	1.455	-1.142
Not E + A	-4.182	1.035	2.087
E + A	-3.244	-4.088	-0.094
E + A + T	3.478	0.194	-0.062
