# Supplementary material for: Convergent mosaic brain evolution is associated with the evolution of novel electrosensory systems in teleost fishes
Source: eLife journal article supplement (doi:10.7554/elife.74159), 2022-06-17
Supplement: supp [file elife-74159-supp-v1.zip › elife_poa_e74159_Figure_5_figure_supplement_2.pdf]

Telencephalon

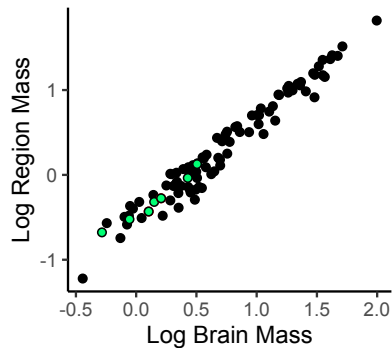

Diencephalon

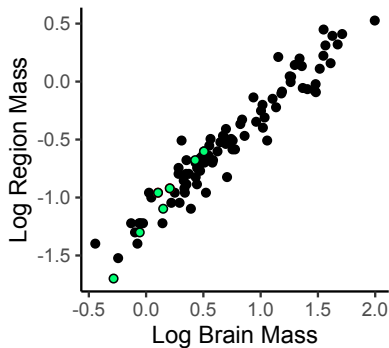

Mesencephalon

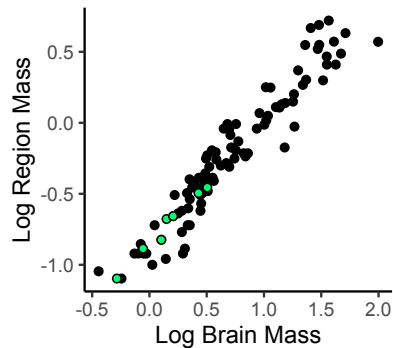

Cerebellum

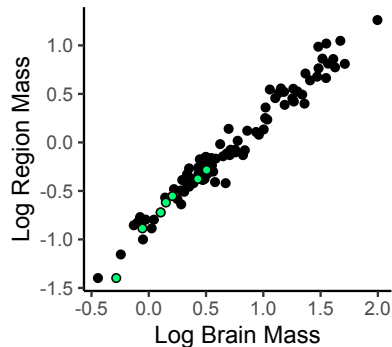

Medulla

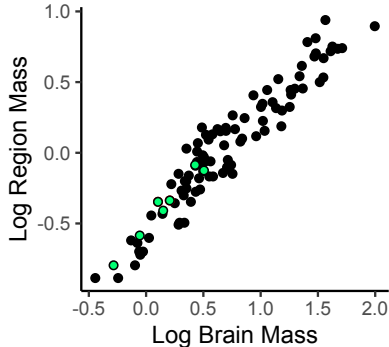

● Electrogenic Chondrichthyans  
● Non-electric Chondrichthyans
