# Supplementary material for: Convergent mosaic brain evolution is associated with the evolution of novel electrosensory systems in teleost fishes
Source: eLife journal article supplement (doi:10.7554/elife.74159), 2022-06-17
Supplement: supp [file elife-74159-supp-v1.zip › elife_poa_e74159_Figure_5_source_data_1.xlsx]

## Sheet: Sheet1
Region	Slope p	Intercept p	Lambda	E + A + T		E + A		Not E
				Slope	Intercept	Slope	Intercept	Slope	Intercept
OB	0.107	0.0034	0.952	0.925028	-2.05975	1.07655	-1.70939	1.08977	-1.81583
TEL	0.334	0.0719	1	0.979677	-0.860306	0.943144	-0.800674	1.08031	-0.842818
HB	0.94	0.0027	0.89	0.921684	-0.472851	0.883315	-0.494126	0.903603	-0.619721
OT	0.0115	0.0002	1	0.841637	-0.811135	0.760434	-0.492119	1.05618	-0.749913
TS	0.295	<.0001	0	0.850787	-0.686723	0.828894	-0.934914	0.946368	-1.19932
CB	0.0251	0.0001	0.948	1.12509	-0.749837	1.27092	-1.01666	0.959262	-0.893169
RoB	0.514	0.0006	0.916	0.925587	-0.853585	0.945781	-0.652771	0.959685	-0.653104
