# Supplementary material for: Convergent mosaic brain evolution is associated with the evolution of novel electrosensory systems in teleost fishes
Source: eLife journal article supplement (doi:10.7554/elife.74159), 2022-06-17
Supplement: supp [file elife-74159-supp-v1.zip › elife_poa_e74159_Figure_5_source_data_2.xlsx]

## Sheet: Sheet1
		E + A + T	E + A	Not E
OB	E + A + T	-		n.s.
	E + A	0.0403	-
	Not E	0.0051	0.8881	-
TEL	E + A + T	-		n.s.
	E + A		-
	Not E	n.s.		-
HB	E + A + T	-		n.s.
	E + A	0.0813	-
	Not E	0.0037	0.9983	-
OT	E + A + T	-	0.053	0.1039
	E + A	0.0876	-	0.0204
	Not E	<.0001	0.5808	-
TS	E + A + T	-		n.s.
	E + A	<.0001	-
	Not E	<.0001	0.0352	-
CB	E + A + T	-	0.4116	0.0746
	E + A	0.6969	-	0.0215
	Not E	<.0001	0.0199	-
RoB	E + A + T	-		n.s.
	E + A	0.0327	-
	Not E	0.0007	1	-
