# Supplementary material for: Convergent mosaic brain evolution is associated with the evolution of novel electrosensory systems in teleost fishes
Source: eLife journal article supplement (doi:10.7554/elife.74159), 2022-06-17
Supplement: supp [file elife-74159-supp-v1.zip › elife_poa_e74159_Figure_5_source_data_3.xlsx]

## Sheet: Sheet1
Region	E + A + T –	E + A + T –	E + A –
	E + A	Not E	Not E
OB	2.139	1.782	0.357
TEL	n.s.
HB	-1.882	-1.925	0.044
OT	1.985	2.899	-0.914
TS	-4.62	-6.13	1.51
CB	-0.714	-3.432	2.718
RoB	2.207	2.208	-0.000791
