# Supplementary material for: Convergent mosaic brain evolution is associated with the evolution of novel electrosensory systems in teleost fishes
Source: eLife journal article supplement (doi:10.7554/elife.74159), 2022-06-17
Supplement: supp [file elife-74159-supp-v1.zip › elife_poa_e74159_Figure_5_source_data_4.xlsx]

## Sheet: Sheet1
Region	Slope p	Intercept p	Lambda	E + A + T		E + A		Not E
				Slope	Intercept	Slope	Intercept	Slope	Intercept
OB	0.1164	0.0034	0.951226	0.922782	-2.05241	1.07818	-1.69936	1.08147	-1.79547
TEL	0.4121	0.0594	1	0.974661	-0.791826	0.935131	-0.731812	1.07427	-0.733202
HB	0.9655	0.0027	0.920012	0.890353	-0.305459	0.858	-0.365202	0.868965	-0.498398
OT	0.9655	0.0007	1	0.830548	-0.758818	0.737407	-0.409608	1.02448	-0.602217
TS	0.2905	<.0001	0	0.83345	-0.612038	0.815651	-0.888906	0.9406	-1.16907
CB	0.0217	0.0001	0.866351	1.20854	-0.696924	1.44566	-1.10521	0.924495	-0.798472
RoB	0.5936	0.0001	1	1.01272	-0.964408	0.925717	-0.535781	0.950336	-0.547488
