# Supplementary material for: Convergent mosaic brain evolution is associated with the evolution of novel electrosensory systems in teleost fishes
Source: eLife journal article supplement (doi:10.7554/elife.74159), 2022-06-17
Supplement: supp [file elife-74159-supp-v1.zip › elife_poa_e74159_Figure_5_source_data_5.xlsx]

## Sheet: Sheet1
		E + A + T	E + A	Not E
OB	E + A + T	-		n.s.
	E + A	0.0394	-
	Not E	0.0052	0.8832	-
TEL	E + A + T	-		n.s.
	E + A		-
	Not E	n.s.		-
HB	E + A + T	-		n.s.
	E + A	0.1014	-
	Not E	0.0032	0.9846	-
OT	E + A + T	-		n.s.
	E + A	0.0231	-
	Not E	0.0006	0.9643	-
TS	E + A + T	-		n.s.
	E + A	<.0001	-
	Not E	<.0001	0.0348	-
CB	E + A + T	-	0.6882	0.0413
	E + A	0.8668	-	0.0414
	Not E	<.0001	0.0197	-
RoB	E + A + T	-		n.s.
	E + A	0.1616	-
	Not E	0.0001	0.9516	-
