# Supplementary material for: Convergent mosaic brain evolution is associated with the evolution of novel electrosensory systems in teleost fishes
Source: eLife journal article supplement (doi:10.7554/elife.74159), 2022-06-17
Supplement: supp [file elife-74159-supp-v1.zip › elife_poa_e74159_Figure_5_source_data_6.xlsx]

## Sheet: Sheet1
Region	E + A + T -	E + A + T -	E + A -
	E + A	Not E	Not E
OB	2.147	1.781	0.366
TEL	n.s.
HB	-1.787	-1.919	0.132
OT	2.278	2.093	0.185
TS	-4.45	-6.02	1.57
CB	-0.454	-3.139	2.685
RoB	2.087	2.391	-0.303
