# Supplementary material for: Convergent mosaic brain evolution is associated with the evolution of novel electrosensory systems in teleost fishes
Source: eLife journal article supplement (doi:10.7554/elife.74159), 2022-06-17
Supplement: supp [file elife-74159-supp-v1.zip › elife_poa_e74159_Figure_6_source_data_1.xlsx]

## Sheet: Sheet1
	OB		OT		RoB		TEL		HB		TS		CB
OB	-		S:	0.546	S:	0.0914	S:	0.6745	S:	0.2697	S:	0.112	S:	0.069
			I:	0.559	I:	0.0928	I:	0.0087	I:	<.0001	I:	<.0001	I:	<.0001
			L:	1	L:	1	L:	1	L:	1	L:	0.952747	L:	0.956803
OT	S:	0.3472	-		S:	0.0064	S:	0.0316	S:	0.0064	S:	0.0288	S:	0.0008
	I:	0.5185			I:	0.1592	I:	0.0507	I:	<.0001	I:	<.0001	I:	<.0001
	L:	0.917624			L:	0.94542	L:	1	L:	1	L:	0.873271	L:	0.971173
RoB	S:	0.6155	S:	0.0891	-		S:	0.324	S:	0.7276	S:	0.7394	S:	0.1859
	I:	0.0928	I:	0.2921			I:	0.1981	I:	<.0001	I:	<.0001	I:	<.0001
	L:	1	L:	1			L:	1	L:	0.981215	L:	0.920695	L:	0.930468
TEL	S:	0.8795	S:	0.6584	S:	0.1965	-		S:	0.2662	S:	0.6584	S:	0.0107
	I:	0.0114	I:	0.08	I:	0.1354			I:	0.0013	I:	<.0001	I:	0.0001
	L:	1	L:	1	L:	1			L:	1	L:	0.69526	L:	0.947892
HB	S:	0.0812	S:	0.4451	S:	0.6658	S:	0.7078	-		S:	0.6758	S:	0.113
	I:	0.0001	I:	0.0001	I:	<.0001	I:	0.0013			I:	0.0022	I:	0.1027
	L:	0.961899	L:	1	L:	0.905593	L:	1			L:	0.675881	L:	0.874637
TS	S:	0.4684	S:	0.2725	S:	0.5389	S:	0.6632	S:	0.4455	-		S:	0.0228
	I:	<.0001	I:	<.0001	I:	<.0001	I:	<.0001	I:	0.0464			I:	0.0083
	L:	0.971189	L:	0.966786	L:	0.923818	L:	0.862464	L:	0.705661			L:	0.395567
CB	S:	0.0948	S:	0.0744	S:	0.4532	S:	0.3361	S:	0.6012	S:	0.0364	-
	I:	0.0016	I:	0.0004	I:	0.001	I:	0.0091	I:	0.6613	I:	0.0121
	L:	0.93032	L:	0.97315	L:	1	L:	0.966781	L:	0.910641	L:	0.478863
