# Supplementary material for: Convergent mosaic brain evolution is associated with the evolution of novel electrosensory systems in teleost fishes
Source: eLife journal article supplement (doi:10.7554/elife.74159), 2022-06-17
Supplement: supp [file elife-74159-supp-v1.zip › elife_poa_e74159_Figure_6_source_data_2.xlsx]

## Sheet: Sheet1
	OB				OT				RoB				TEL				HB				TS				CB
OB	-					E + A + T	E + A	Not E		E + A + T	E + A	Not E		E + A + T	E + A	Not E		E + A + T	E + A	Not E		E + A + T	E + A	Not E		E + A + T	E + A	Not E
					E + A + T	-		n.s.	E + A + T	-		n.s.	E + A + T	-		n.s.	E + A + T	-		n.s.	E + A + T	-		n.s.	E + A + T	-		n.s.
					E + A		-		E + A		-		E + A	0.1338	-		E + A	0.021	-		E + A	0.0045	-		E + A	0.1782	-
					Not E	n.s.		-	Not E	n.s.		-	Not E	0.0066	0.9971	-	Not E	<.0001	0.8397	-	Not E	<.0001	0.8235	-	Not E	0.0002	0.4088	-
OT		E + A + T	E + A	Not E	-					E + A + T	E + A	Not E		E + A + T	E + A	Not E		E + A + T	E + A	Not E		E + A + T	E + A	Not E		E + A + T	E + A	Not E
	E + A + T	-		n.s.					E + A + T	-	0.6423	0.0152	E + A + T	-	0.5645	0.0387	E + A + T	-	0.5333	0.0074	E + A + T	-	0.9966	0.0313	E + A + T	-	0.2067	0.0059
	E + A		-						E + A		-	0.014	E + A		-	0.0275	E + A	0.1154	-	0.0062	E + A	0.0008	-	0.1629	E + A	0.2061	-	0.001
	Not E	n.s.		-					Not E	n.s.		-	Not E	n.s.		-	Not E	<.0001	0.3633	-	Not E	<.0001	0.1944	-	Not E	<.0001	0.0546	-
RoB		E + A + T	E + A	Not E		E + A + T	E + A	Not E	-					E + A + T	E + A	Not E		E + A + T	E + A	Not E		E + A + T	E + A	Not E		E + A + T	E + A	Not E
	E + A + T	-		n.s.	E + A + T	-		n.s.					E + A + T	-		n.s.	E + A + T	-		n.s.	E + A + T	-		n.s.	E + A + T	-		n.s.
	E + A		-		E + A		-						E + A		-		E + A	0.0065	-		E + A	<.0001	-		E + A	0.1803	-
	Not E	n.s.		-	Not E	n.s.		-					Not E	n.s.		-	Not E	<.0001	0.8268	-	Not E	<.0001	0.7444	-	Not E	<.0001	0.2661	-
TEL		E + A + T	E + A	Not E		E + A + T	E + A	Not E		E + A + T	E + A	Not E	-					E + A + T	E + A	Not E		E + A + T	E + A	Not E		E + A + T	E + A	Not E
	E + A + T	-		n.s.	E + A + T	-		n.s.	E + A + T	-		n.s.					E + A + T	-		n.s.	E + A + T	-		n.s.	E + A + T	-	0.6283	0.0227
	E + A	0.0743	-		E + A		-		E + A		-						E + A	0.2061	-		E + A	0.0203	-		E + A	0.9405	-	0.0168
	Not E	0.0115	0.8844	-	Not E	n.s.		-	Not E	n.s.		-					Not E	0.0009	0.7141	-	Not E	<.0001	0.1249	-	Not E	<.0001	0.0132	-
HB		E + A + T	E + A	Not E		E + A + T	E + A	Not E		E + A + T	E + A	Not E		E + A + T	E + A	Not E	-					E + A + T	E + A	Not E		E + A + T	E + A	Not E
	E + A + T	-		n.s.	E + A + T	-		n.s.	E + A + T	-		n.s.	E + A + T	-		n.s.					E + A + T	-		n.s.	E + A + T	-		n.s.
	E + A	0.0046	-		E + A	0.0074	-		E + A	0.0015	-		E + A	0.2065	-						E + A	0.2331	-		E + A		-
	Not E	0.0001	0.923	-	Not E	0.0001	0.9465	-	Not E	<.0001	0.9798	-	Not E	0.001	0.7143	-					Not E	0.0025	0.5235	-	Not E	n.s.		-
TS		E + A + T	E + A	Not E		E + A + T	E + A	Not E		E + A + T	E + A	Not E		E + A + T	E + A	Not E		E + A + T	E + A	Not E	-					E + A + T	E + A	Not E
	E + A + T	-		n.s.	E + A + T	-		n.s.	E + A + T	-		n.s.	E + A + T	-		n.s.	E + A + T	-		n.s.					E + A + T	-		n.s.
	E + A	0.0015	-		E + A	0.0001	-		E + A	<.0001	-		E + A	0.0063	-		E + A	0.21	-						E + A	0.0799	-
	Not E	<.0001	0.9251	-	Not E	<.0001	0.95	-	Not E	<.0001	0.9903	-	Not E	<.0001	0.7679	-	Not E	0.0734	0.9932	-					Not E	0.962	0.1637	-
CB		E + A + T	E + A	Not E		E + A + T	E + A	Not E		E + A + T	E + A	Not E		E + A + T	E + A	Not E		E + A + T	E + A	Not E		E + A + T	E + A	Not E	-
	E + A + T	-		n.s.	E + A + T	-		n.s.	E + A + T	-		n.s.	E + A + T	-		n.s.	E + A + T	-		n.s.	E + A + T	-		n.s.
	E + A	0.0294	-		E + A	0.034	-		E + A	0.0672	-		E + A	0.4285	-		E + A		-		E + A	0.1447	-
	Not E	0.0025	0.9848	-	Not E	0.0004	0.9498	-	Not E	0.0009	0.8551	-	Not E	0.0065	0.5711	-	Not E	n.s.		-	Not E	0.187	0.8852	-
