# Supplementary material for: Convergent mosaic brain evolution is associated with the evolution of novel electrosensory systems in teleost fishes
Source: eLife journal article supplement (doi:10.7554/elife.74159), 2022-06-17
Supplement: supp [file elife-74159-supp-v1.zip › elife_poa_e74159_Figure_6_source_data_3.xlsx]

## Sheet: Sheet1
	OB			OT			RoB			TEL			HB			TS			CB
	E + A + T -	E + A + T -	E + A -	E + A + T -	E + A + T -	E + A -	E + A + T -	E + A + T -	E + A -	E + A + T -	E + A + T -	E + A -	E + A + T -	E + A + T -	E + A -	E + A + T -	E + A + T -	E + A -	E + A + T -	E + A + T -	E + A -
	E + A	Not E	Not E	E + A	Not E	Not E	E + A	Not E	Not E	E + A	Not E	Not E	E + A	Not E	Not E	E + A	Not E	Not E	E + A	Not E	Not E
OB	-			n.s.			n.s.			-1.6376	-1.5854	-0.0522	-2.401	-2.79	0.389	-3.071	-3.527	0.456	-1.57	-2.56	0.99
OT	n.s.			-			-0.159	-1.111	0.951	-0.901	-1.296	0.395	-1.93	-3.1	1.17	-3.99	-5.57	1.58	-1.59	-3.66	2.07
RoB	1.898	2.334	-0.436	-2.826	-3.263	0.437	-			n.s.			-2.826	-3.263	0.437	-4.613	-5.188	0.575	-1.52	-2.76	1.24
TEL	1.85	1.51	0.34	n.s.			n.s.			-			-1.403	-1.945	0.542	-2.8	-4.51	1.71	-0.291	-2.935	2.645
HB	2.95	2.66	0.29	2.641	2.412	0.229	3.372	3.22	0.152	1.403	1.945	-0.542	-			-1.35	-2.276	0.926	n.s.
TS	3.392	3.108	0.284	4.255	4.023	0.231	4.771	4.876	-0.104	2.873	3.44	-0.567	1.439	1.534	-0.095	-			1.81	0.18	1.63
CB	2.227	2.093	0.134	2.146	2.381	-0.236	1.898	2.334	-0.436	1.016	1.807	-0.792	n.s.			-1.564	-1.141	-0.424	-
