# Supplementary material for: Convergent mosaic brain evolution is associated with the evolution of novel electrosensory systems in teleost fishes
Source: eLife journal article supplement (doi:10.7554/elife.74159), 2022-06-17
Supplement: supp [file elife-74159-supp-v1.zip › elife_poa_e74159_Figure_7_source_data_1.xlsx]

## Sheet: Sheet1
Region	Mormyroids (N=7) vs gymnotiforms (N=11)								Non-electric osteoglossiforms (N=3) vs non-electric otophysans (N=7)								Wave (N=6) vs pulse (N=5) gymnotiforms
	Slope p	Intercept p	l	d	Mormyroids		Gymnotiforms		Slope p	Intercept p	l	d	Osteoglossiforms		Otophysans		Slope p	Intercept p	l	d	Wave		Pulse
					Slope	Intercept	Slope	Intercept					Slope	Intercept	Slope	Intercept					Slope	Intercept	Slope	Intercept
OB	<.0001	0.013	1	2.06	0.528461	-1.49451	1.1606	-2.24424	0.588	0.427	0	-	1.07158	-1.72635	0.934337	-1.70203	0.135	0.851	1	-	1.21651	-2.35184	0.845642	-1.74633
TEL	0.198	0.704	1	-	0.899767	-0.652148	0.991023	-0.906858	0.335	0.007	0	-4.95	1.01302	-0.570636	0.824314	-0.697465	0.054	0.271	1	-	1.00729	-0.977947	0.63981	-0.316057
HB	0.289	0.368	0.749	-	0.860764	-0.370465	0.95344	-0.503622	0.682	0.834	1	-	0.85423	-0.54488	0.953821	-0.662535	0.075	0.795	1	-	0.93673	-0.468769	1.14161	-0.802455
OT	0.12	0.273	1	-	0.761241	-0.719981	0.861305	-0.781292	0.501	0.749	0.838	-	1.01952	-0.714629	1.11989	-0.794648	0.582	0.612	1	-	0.862304	-0.766158	0.766826	-0.649426
TS	0.0026	0.808	0.7	-0.466	0.741467	-0.452052	0.952889	-0.864698	0.535	0.725	0	-	1.01177	-1.30132	0.854564	-1.1179	0.845	0.602	0.588	-	0.985369	-0.907061	0.954916	-0.87905
CB	0.019	0.137	1	-0.466	1.17765	-0.787112	1.08389	-0.737879	0.297	0.251	1	-	1.35797	-1.64977	0.944143	-0.822783	0.158	0.531	0.757	-	1.06898	-0.699159	1.21014	-0.947954
RoB	0.0027	0.042	1	1.84	0.816236	-0.755931	1.03045	-0.926824	0.295	0.126	1	-	0.924881	-0.655591	1.11063	-0.759653	0.111	0.242	0	-	1.05428	-0.985694	0.911442	-0.727628
