# Supplementary material for: Convergent mosaic brain evolution is associated with the evolution of novel electrosensory systems in teleost fishes
Source: eLife journal article supplement (doi:10.7554/elife.74159), 2022-06-17
Supplement: supp [file elife-74159-supp-v1.zip › elife_poa_e74159_Figure_7_source_data_2.xlsx]

## Sheet: Sheet1
Region	Mormyroids (N=7) vs gymnotiforms (N=11)								Non-electric osteoglossiforms (N=3) vs non-electric otophysans (N=7)								Wave (N=6) vs pulse (N=5) gymnotiforms
	Slope p	Intercept p	l	d	Mormyroids		Gymnotiforms		Slope p	Intercept p	l	d	Osteoglossiforms		Otophysans		Slope p	Intercept p	l	d	Wave		Pulse
					Slope	Intercept	Slope	Intercept					Slope	Intercept	Slope	Intercept					Slope	Intercept	Slope	Intercept
OB	<.0001	0.0132	1	2.06	0.523598	-1.46313	1.21016	-2.32729	0.5762	0.4034	0	-	1.14009	-1.81695	0.710851	-1.48418	0.1316	0.8486	1	-	1.22056	-2.35315	0.841592	-1.73605
TEL	0.1871	0.6592	1	-	0.88498	-0.561859	0.990817	-0.850123	0.2987	0.0033	0	-5.12	1.04058	-0.461692	0.712967	-0.544767	0.0458	0.1474	0.679704	0.65	1.04617	-1.0032	0.575051	-0.17539
HB	0.3335	0.4805	0.838332	-	0.839108	-0.23667	0.939862	-0.355192	0.7706	0.9233	1	-	0.826028	-0.432344	0.920765	-0.540728	0.0764	0.7576	1	-	0.901308	-0.28665	1.20397	-0.740172
OT	0.1277	0.2739	1	-	0.748525	-0.671524	0.850892	-0.725323	0.954	0.8978	1	-	1.02217	-0.615117	1.0574	-0.619735	0.5443	0.6141	1	-	0.852306	-0.70944	0.740574	-0.574839
TS	0.0031	0.7799	0.0555988	-0.47	0.716296	-0.363117	0.945359	-0.8014	0.5093	0.6913	0	-	1.01272	-1.27914	0.836407	-1.07956	0.8747	0.5644	0.563112	-	0.97287	-0.831581	0.945819	-0.815798
CB	0.0579	0.1763	0.852027	-	1.32028	-0.78737	1.12122	-0.656249	0.3121	0.3063	1	-	1.36205	-1.59864	0.927116	-0.748527	0.1484	0.5306	0.788686	-	1.09623	-0.599537	1.27156	-0.88908
RoB	0.0023	0.0356	1	1.9	0.804513	-0.7049	1.03122	-0.863493	0.3082	0.1423	1	-	0.906753	-0.551849	1.11694	-0.642247	0.1093	0.261	0	-	1.0626	-0.935831	0.896479	-0.646835
