# Supplementary material for: Convergent mosaic brain evolution is associated with the evolution of novel electrosensory systems in teleost fishes
Source: eLife journal article supplement (doi:10.7554/elife.74159), 2022-06-17
Supplement: supp [file elife-74159-supp-v1.zip › elife_poa_e74159_Figure_7_source_data_3.xlsx]

## Sheet: Sheet1
	OB		OT		RoB		TEL		HB		TS		CB
OB	-		S:	0.0569	S:	0.0549	S:	0.0619	S:	0.3486	S:	0.7674	S:	0.8738
			I:	0.1843	I:	0.0359	I:	<.0001	I:	<.0001	I:	0.0591	I:	<.0001
			L:	0.867674	L:	0.468638	L:	0	L:	0	L:	1	L:	0
			D:	-	D:	-1.94	D:	-4.21	D:	-3.71	D:	-	D:	-3.84
OT	S:	0.0023	-		S:	0.1226	S:	0.8867	S:	0.7939	S:	0.008	S:	0.1803
	I:	0.162			I:	0.5113	I:	0.1796	I:	0.5258	I:	0.1097	I:	0.1899
	L:	1			L:	0.926997	L:	1	L:	1	L:	0.911196	L:	0.995134
	D:	1.16			D:	-	D:	-	D:	-	D:	-2.1	D:	-
RoB	S:	0.0015	S:	0.8714	-		S:	0.1406	S:	0.8714	S:	0.0736	S:	0.061
	I:	0.1472	I:	0.5216			I:	0.0174	I:	0.062	I:	0.0146	I:	0.0779
	L:	1	L:	1			L:	1	L:	0.707904	L:	0.789853	L:	0.927873
	D:	1.27	D:	-			D:	-2.92	D:	-	D:	-2.77	D:	-
TEL	S:	0.0005	S:	0.6	S:	0.1886	-		S:	0.9514	S:	0.0863	S:	0.037
	I:	0.0097	I:	0.1796	I:	0.0215			I:	0.5648	I:	0.8012	I:	0.6635
	L:	1	L:	1	L:	1			L:	0.996951	L:	0.748747	L:	1
	D:	2.41	D:	-	D:	2.85			D:	-	D:	-	D:	-0.0677
HB	S:	0.0062	S:	0.7752	S:	0.6898	S:	0.4317	-		S:	0.0783	S:	0.4033
	I:	0.0259	I:	0.5461	I:	0.0504	I:	0.3431			I:	0.2399	I:	0.1217
	L:	0.859036	L:	1	L:	0.577607	L:	0.87443			L:	0.557723	L:	0.793067
	D:	2.32	D:	-	D:	-	D:	-			D:	-	D:	-
TS	S:	0.062	S:	0.0194	S:	0.2555	S:	0.0626	S:	0.0097	-		S:	0.0595
	I:	0.0635	I:	0.1488	I:	0.0332	I:	0.57	I:	0.7943			I:	0.0819
	L:	1	L:	0.893367	L:	0.847508	L:	0.808198	L:	0.951963			L:	0.680376
	D:	-	D:	2.09	D:	2.46	D:	-	D:	0.855			D:	-
CB	S:	<.0001	S:	0.0161	S:	0.1452	S:	0.1894	S:	0.0283	S:	0.0136	-
	I:	0.007	I:	0.1344	I:	0.0847	I:	0.9007	I:	0.2762	I:	0.4893
	L:	1	L:	1	L:	0.833309	L:	0.940781	L:	0.983875	L:	0.73798
	D:	2.18	D:	1.24	D:	-	D:	-	D:	0.943	D:	0.593
