# Supplementary material for: Convergent mosaic brain evolution is associated with the evolution of novel electrosensory systems in teleost fishes
Source: eLife journal article supplement (doi:10.7554/elife.74159), 2022-06-17
Supplement: supp [file elife-74159-supp-v1.zip › elife_poa_e74159_Figure_7_source_data_4.xlsx]

## Sheet: Sheet1
	OB		OT		RoB		TEL		HB		TS		CB
OB	-		S:	0.566	S:	0.9794	S:	0.4774	S:	0.9407	S:	0.4726	S:	0.0965
			I:	0.4776	I:	0.3619	I:	0.0201	I:	0.5137	I:	0.3192	I:	0.8433
			L:	0.8539	L:	0	L:	0	L:	0.323637	L:	0	L:	0
			D:	-	D:	-	D:	-3.78	D:	-	D:	-	D:	-
OT	S:	0.2649	-		S:	0.486	S:	0.1386	S:	0.3302	S:	0.1654	S:	0.215
	I:	0.0758			I:	0.5147	I:	0.0054	I:	0.1403	I:	0.0952	I:	0.9331
	L:	0			L:	0	L:	0	L:	0.0765538	L:	0	L:	1
	D:	-			D:	-	D:	-4.15	D:	-	D:	-	D:	-
RoB	S:	0.5978	S:	0.7867	-		S:	0.3989	S:	0.8252	S:	0.2747	S:	0.4377
	I:	0.136	I:	0.8656			I:	0.0089	I:	0.4111	I:	0.1051	I:	0.9292
	L:	0	L:	0			L:	1	L:	1	L:	0	L:	1
	D:	-	D:	-			D:	-4.05	D:	-	D:	-	D:	-
TEL	S:	0.9794	S:	0.7606	S:	0.4813	-		S:	0.5923	S:	0.8505	S:	0.2421
	I:	0.3619	I:	0.4128	I:	0.0694			I:	0.202	I:	0.2249	I:	0.0564
	L:	0	L:	0	L:	1			L:	0.926739	L:	0	L:	0.0193975
	D:	-	D:	-	D:	-			D:	-	D:	-	D:	-
HB	S:	0.6997	S:	0.7204	S:	0.7839	S:	0.3817	-		S:	0.4214	S:	0.3264
	I:	0.4683	I:	0.7611	I:	0.7287	I:	0.0284			I:	0.4432	I:	0.6393
	L:	0.355534	L:	1	L:	1	L:	1			L:	1	L:	0
	D:	-	D:	-	D:	-	D:	-3.24			D:	-	D:	-
TS	S:	0.5688	S:	0.9169	S:	0.664	S:	0.464	S:	0.9727	-		S:	0.2693
	I:	0.3773	I:	0.975	I:	0.6779	I:	0.0157	I:	0.6914			I:	0.1718
	L:	0	L:	1	L:	0.995104	L:	0	L:	0			L:	1
	D:	-	D:	-	D:	-	D:	-4.07	D:	-			D:	-
CB	S:	0.8015	S:	0.3938	S:	0.2386	S:	0.8044	S:	0.2318	S:	0.0778	-
	I:	0.067	I:	0.3907	I:	0.4445	I:	0.0007	I:	0.0686	I:	0.0126
	L:	0	L:	1	L:	1	L:	0	L:	0	L:	0
	D:	-	D:	-	D:	-	D:	-5.69	D:	-	D:	-3.26
