# Supplementary material for: Convergent mosaic brain evolution is associated with the evolution of novel electrosensory systems in teleost fishes
Source: eLife journal article supplement (doi:10.7554/elife.74159), 2022-06-17
Supplement: supp [file elife-74159-supp-v1.zip › elife_poa_e74159_Figure_7_source_data_5.xlsx]

## Sheet: Sheet1
	OB		OT		RoB		TEL		HB		TS		CB
OB	-		S:	0.9038	S:	0.9783	S:	0.5918	S:	0.2113	S:	0.9792	S:	0.2986
			I:	0.6652	I:	0.8472	I:	0.4573	I:	0.7443	I:	0.8361	I:	0.6112
			L:	1	L:	1	L:	1	L:	1	L:	1	L:	1
			D:	-	D:	-	D:	-	D:	-	D:	-	D:	-
OT	S:	0.3223	-		S:	0.6	S:	0.1379	S:	0.504	S:	0.7667	S:	0.8837
	I:	0.7009			I:	0.3049	I:	0.1414	I:	0.85	I:	0.5866	I:	0.5866
	L:	1			L:	1	L:	1	L:	1	L:	1	L:	1
	D:	-			D:	-	D:	-	D:	-	D:	-	D:	-
RoB	S:	0.392	S:	0.8631	-		S:	0.1327	S:	0.1027	S:	0.6614	S:	0.1098
	I:	0.8255	I:	0.2934			I:	0.2305	I:	0.5535	I:	0.3232	I:	0.3331
	L:	1	L:	1			L:	0.354672	L:	0.376841	L:	1	L:	0.261085
	D:	-	D:	-			D:	-	D:	-	D:	-	D:	-
TEL	S:	0.8959	S:	0.3442	S:	0.4111	-		S:	0.1292	S:	0.407	S:	0.2361
	I:	0.4394	I:	0.1338	I:	0.1454			I:	0.3779	I:	0.1043	I:	0.2512
	L:	1	L:	1	L:	0.341917			L:	1	L:	0.463676	L:	1
	D:	-	D:	-	D:	-			D:	-	D:	-	D:	-
HB	S:	0.0078	S:	0.2775	S:	0.3312	S:	0.0403	-		S:	0.3988	S:	0.253
	I:	0.7696	I:	0.8146	I:	0.7743	I:	0.3989			I:	0.7049	I:	0.7678
	L:	1	L:	1	L:	0	L:	1			L:	0.583234	L:	1
	D:	-0.543	D:	-	D:	-	D:	0.233			D:	-	D:	-
TS	S:	0.3447	S:	0.8114	S:	0.6192	S:	0.127	S:	0.2212	-		S:	0.4646
	I:	0.8651	I:	0.5831	I:	0.3296	I:	0.231	I:	0.9095			I:	0.9913
	L:	1	L:	0.968535	L:	1	L:	0.665683	L:	1			L:	0.307187
	D:	-	D:	-	D:	-	D:	-	D:	-			D:	-
CB	S:	0.0433	S:	0.2398	S:	0.0595	S:	0.0242	S:	0.6054	S:	0.4111	-
	I:	0.5477	I:	0.9171	I:	0.4776	I:	0.143	I:	0.7692	I:	0.6131
	L:	1	L:	1	L:	0	L:	1	L:	1	L:	0
	D:	-0.189	D:	-	D:	-	D:	0.455	D:	-	D:	-
