# Supplementary material for: Convergent mosaic brain evolution is associated with the evolution of novel electrosensory systems in teleost fishes
Source: eLife journal article supplement (doi:10.7554/elife.74159), 2022-06-17
Supplement: supp [file elife-74159-supp-v1.zip › elife_poa_e74159_Figure_9_source_data_1.xlsx]

## Sheet: Sheet1
Species	OB	TEL	HB	OT	TS	CB	RoB	TBV
S. elegans	0.0095	0.0095	0.0135	0.0113	0.0132	0.0131	0.0274	0.0124
S. macrurus	0.0135	0.0054	0.0216	0.0153	0.0006	0.0116	0.0216	0.0061
S. multipunctatus	0.0397	0.0272	0.0386	0.0051	0.0353	0.0028	0.0321	0.0028
P. interruptus	0.007	0.0045	0.0165	0.0042	0.0192	0.0067	0.0239	0.002
