# Supplementary material for: Convergent mosaic brain evolution is associated with the evolution of novel electrosensory systems in teleost fishes
Source: eLife journal article supplement (doi:10.7554/elife.74159), 2022-06-17
Supplement: supp [file elife-74159-supp-v1.zip › elife_poa_e74159_Supplementary_file_1.csv]

Species	ID	Family	Mass.g	OB	TEL	HB	OT	TS	CB	RoB	Total Brain Volume	Group	Electroreceptor	Electrogenic	Lineage
Apteronotus_albifrons	AA1	Apteronotidae	4.48	0.9752	12.445	25.154	6.529	9.208	19.092	15.618	89.0212	Wave_Gymnotiform	Tuberous	Yes	Otophysan
Apteronotus_albifrons	AA2	Apteronotidae	15.71	1.5027	10.877	27.018	8.5575	11.826	35.927	11.574	107.2822	Wave_Gymnotiform	Tuberous	Yes	Otophysan
Brachyhypopomus_gauderio	BP1	Hypopomidae	2.46	0.15983999	2.7364	6.52	2.7412	2.6164	5.276	3.1132	23.16303999	Pulse_Gymnotiform	Tuberous	Yes	Otophysan
Brachyhypopomus_gauderio	BP2	Hypopomidae	8.79	0.361	5.435	8.732	3.255	4.474	8.312	4.8	35.369	Pulse_Gymnotiform	Tuberous	Yes	Otophysan
Brevimyrus_niger	BN250	Mormyridae	6.12	0.1752	4.16	10.866	2.087	6.453	14.286	2.3633	40.3905	Pulse_Mormyroid	Tuberous	Yes	Osteoglossiform
Brevimyrus_niger	BN252	Mormyridae	3.02	0.1382	3.2995	6.7305	1.7555	3.6935	9.347	1.9471	26.9113	Pulse_Mormyroid	Tuberous	Yes	Osteoglossiform
Brevimyrus_niger	BN254	Mormyridae	2.95	0.2462	6.662	11.452	4.4265	5.457	17.165	3.0385	48.4472	Pulse_Mormyroid	Tuberous	Yes	Osteoglossiform
Brevimyrus_niger	BN255	Mormyridae	4.57	0.288866667	7.257666667	14.35966667	3.539166667	8.223	21.434	4.43066667	59.53303333	Pulse_Mormyroid	Tuberous	Yes	Osteoglossiform
Brevimyrus_niger	BN256	Mormyridae	9.52	0.5418	15.286	29.767	9.245	17.245	55.092	9.3852	136.562	Pulse_Mormyroid	Tuberous	Yes	Osteoglossiform
Brienomyrus_brachyistius	BB951	Mormyridae	4.06	0.0672	3.518	7.5995	1.2875	4.083	11.413	2.0669	30.0351	Pulse_Mormyroid	Tuberous	Yes	Osteoglossiform
Brienomyrus_brachyistius	BB952	Mormyridae	7.535	0.1946	8.281	13.33	3.2795	5.864	21.618	3.2578	55.8249	Pulse_Mormyroid	Tuberous	Yes	Osteoglossiform
Brienomyrus_brachyistius	BB957	Mormyridae	4.945	0.151666667	7.034333333	9.966	2.091166667	5.268	18.68966667	3.469933333	46.67076667	Pulse_Mormyroid	Tuberous	Yes	Osteoglossiform
Brienomyrus_brachyistius	BB959	Mormyridae	4.64	0.3166	8.41	12.062	4.322	6.577	26.38	4.5013	62.5689	Pulse_Mormyroid	Tuberous	Yes	Osteoglossiform
Brienomyrus_brachyistius	BB958	Mormyridae	11.77	0.556666667	12.957	17.703	4.184	9.559	39.15766667	6.38276667	81.1701	Pulse_Mormyroid	Tuberous	Yes	Osteoglossiform
Campylomormyrus_spp	CS1	Mormyridae	5.35	0.211333333	14.11133333	20.94466667	5.208	9.576666667	63.80433333	5.346500003	119.2028333	Pulse_Mormyroid	Tuberous	Yes	Osteoglossiform
Campylomormyrus_spp	CS2	Mormyridae	4.89	0.2556	16.498	30.109	8.129	14.179	86.377	7.4565	163.0041	Pulse_Mormyroid	Tuberous	Yes	Osteoglossiform
Campylomormyrus_spp	CS3	Mormyridae	13.03	0.441066667	32.17566667	42.20733333	9.683	23.843	214.3833333	15.696	338.4294	Pulse_Mormyroid	Tuberous	Yes	Osteoglossiform
Campylomormyrus_spp	CS4	Mormyridae	7.237	0.3976	22.617	37.631	10.094	17.093	142.06	11.0095	240.9021	Pulse_Mormyroid	Tuberous	Yes	Osteoglossiform
Campylomormyrus_spp	CS5	Mormyridae	9.29	0.4035	31.79	50.6075	13.437	23.846	195.77	17.8265	333.6805	Pulse_Mormyroid	Tuberous	Yes	Osteoglossiform
Chitala_ornata	CO5	Notopteridae	7.38	3.5155	34.169	17.544	24.297	5.224	13.652	18.8545	117.256	Outgroup_Ossteoglossiforms	None	No	Osteoglossiform
Chitala_ornata	CO9	Notopteridae	10.43	4.421666667	44.60366667	18.791	25.93966667	7.109666667	16.60833333	19.003	136.477	Outgroup_Ossteoglossiforms	None	No	Osteoglossiform
Chitala_ornata	CO7	Notopteridae	6.36	2.0965	24.398	12.935	18.331	5.211	11.006	13.15	87.1275	Outgroup_Ossteoglossiforms	None	No	Osteoglossiform
Chitala_ornata	CO8	Notopteridae	6.4	1.428	18.429	10.89	15.364	4.523	9.139	10.8315	70.6045	Outgroup_Ossteoglossiforms	None	No	Osteoglossiform
Chitala_ornata	CO6	Notopteridae	15.45	3.503	33.912	14.622	26.163	5.3985	14.664	19.1413	117.4038	Outgroup_Ossteoglossiforms	None	No	Osteoglossiform
Corydoras_sterbai	CoS4	Callichthyidae	1.41	0.12912	0.86	2.1036	1.7202	0.31296	1.0538	1.823	8.00268	Nonelectric_Siluriforms	Only_ampullary	No	Otophysan
Corydoras_sterbai	CoS1	Callichthyidae	1.33	0.15792	1.1091	2.7144	1.9595	0.487359999	1.2448	1.9381	9.611179999	Nonelectric_Siluriforms	Only_ampullary	No	Otophysan
Corydoras_sterbai	CoS2	Callichthyidae	1.8	0.12719999	0.83535999	2.076	1.5858	0.34176	0.925119999	1.6094	7.500639979	Nonelectric_Siluriforms	Only_ampullary	No	Otophysan
Danio_rerio	DRSN1	Cyprinidae	0.29	0.1206	1.0796	0.82392	1.0476	0.37044	0.67032	1.2522	5.36468	Outgroup_Otophysans	None	No	Otophysan
Danio_rerio	DRCB1	Cyprinidae	0.34	0.09204	0.80028	0.886919999	1.1513	0.22296	0.61176	1.199	4.964259999	Outgroup_Otophysans	None	No	Otophysan
Danio_rerio	DRKL1	Cyprinidae	0.3	0.0978	0.71484	0.84564	1.1832	0.2334	0.638879999	1.1844	4.898159999	Outgroup_Otophysans	None	No	Otophysan
Danio_rerio	DRSN2	Cyprinidae	0.28	0.07032	0.73164	0.54624	1.091	0.21359999	0.395279999	1.16464	4.212719989	Outgroup_Otophysans	None	No	Otophysan
Danio_rerio	DRKL3	Cyprinidae	0.19	0.0636	0.49764	0.4866	0.71328	0.08904	0.312839999	0.74136	2.904359999	Outgroup_Otophysans	None	No	Otophysan
Danio_rerio	DRBM3	Cyprinidae	0.4	0.10944	0.83495999	0.74159999	0.9852	0.174599999	0.52008	1.1573	4.523179979	Outgroup_Otophysans	None	No	Otophysan
Danio_rerio	DRBM1	Cyprinidae	0.38	0.064559999	0.59556	0.72048	0.97416	0.1974	0.493919999	0.907799999	3.953879997	Outgroup_Otophysans	None	No	Otophysan
Danio_rerio	DRSN3	Cyprinidae	0.22	0.080639999	0.65292	0.516119999	0.72912	0.148439999	0.2772	0.8694	3.273839997	Outgroup_Otophysans	None	No	Otophysan
Danio_rerio	DRCB3	Cyprinidae	0.24	0.05604	0.572519999	0.50292	0.7494	0.17556	0.3414	0.59316	2.990999999	Outgroup_Otophysans	None	No	Otophysan
Danio_rerio	DRBM2	Cyprinidae	0.35	0.1026	0.89556	0.86664	1.1369	0.323399	0.582839	0.972239	4.880177	Outgroup_Otophysans	None	No	Otophysan
Danio_rerio	DRCB2	Cyprinidae	0.38	0.09156	1.0418	0.799559999	1.1893	0.310079999	0.527879999	1.1314	5.091579997	Outgroup_Otophysans	None	No	Otophysan
Danio_rerio	DRKL2	Cyprinidae	0.35	0.0732	0.574079999	0.58992	0.85908	0.22788	0.440279999	0.726	3.490439998	Outgroup_Otophysans	None	No	Otophysan
Devario_aequipinnatus	DA1	Cyprinidae	2.01	0.46112	2.8428	3.02199999	4.1312	0.70304	2.4138	4.3452	17.92635999	Outgroup_Otophysans	None	No	Otophysan
Devario_aequipinnatus	DA2	Cyprinidae	1.97	0.28912	2.032	2.293199999	2.8024	0.87936	1.827	3.544	13.66708	Outgroup_Otophysans	None	No	Otophysan
Devario_aequipinnatus	DA3	Cyprinidae	1.77	0.22224	1.6186	2.2198	3.0284	0.797439999	1.4918	2.7264	12.10468	Outgroup_Otophysans	None	No	Otophysan
Devario_aequipinnatus	DA4	Cyprinidae	1.64	0.34784	1.7528	2.422	3.4348	0.867679999	1.7416	3.3616	13.92832	Outgroup_Otophysans	None	No	Otophysan
Eigenmannia_limbata	EL3	Sternopygidae	6.66	0.62479999	6.4	14.776	6.577	7.536	17.483	7.235	60.63179999	Wave_Gymnotiform	Tuberous	Yes	Otophysan
Eigenmannia_virescens	EV2	Sternopygidae	3.65	0.281199999	2.9335	7.1885	3.716	4.806	7.944	4.156	31.0252	Wave_Gymnotiform	Tuberous	Yes	Otophysan
Eigenmannia_virescens	EV5	Sternopygidae	3.68	0.22464	2.814	7.7432	3.604	4.1372	7.1648	3.4932	29.18104	Wave_Gymnotiform	Tuberous	Yes	Otophysan
Eigenmannia_virescens	EV7	Sternopygidae	3.71	0.36944	3.4916	8.7216	4.7768	5.4152	9.0896	5.2112	37.07544	Wave_Gymnotiform	Tuberous	Yes	Otophysan
Electrophorus_spp	EE1	Gymnotidae	3.46	0.31008	5.3688	9.8864	4.6576	4.5528	8.1488	5.5608	38.48528	Pulse_Gymnotiform	Tuberous	Yes	Otophysan
Electrophorus_spp	EE2	Gymnotidae	2.3	0.31224	4.179	7.326	3.4458	3.5028	5.9262	4.4748	29.16684	Pulse_Gymnotiform	Tuberous	Yes	Otophysan
Gnathonemus_petersii	GP23	Mormyridae	5.21	0.1006	5.483	13.712	3.4255	7.428	25.23	3.0171	58.3962	Pulse_Mormyroid	Tuberous	Yes	Osteoglossiform
Gnathonemus_petersii	GP35	Mormyridae	8.45	0.2224	14.664	25.561	5.872	15.816	81.951	6.1586	150.245	Pulse_Mormyroid	Tuberous	Yes	Osteoglossiform
Gnathonemus_petersii	GP36	Mormyridae	6.22	0.215533333	13.31333333	21.58666667	6.324	10.99166667	51.88	6.6555	110.9667	Pulse_Mormyroid	Tuberous	Yes	Osteoglossiform
Gnathonemus_petersii	GP37	Mormyridae	5.82	0.204	10.349	22.733	5.735	10.488	46.034	4.5785	100.1215	Pulse_Mormyroid	Tuberous	Yes	Osteoglossiform
Gnathonemus_petersii	GP38	Mormyridae	15.53	0.3926	22.139	42.762	7.796	23.319	129.73	11.534	237.6726	Pulse_Mormyroid	Tuberous	Yes	Osteoglossiform
Gymnarchus_niloticus	GN1	Gymnarchidae	0	0.749	22.754	33.442	14.534	14.806	54.286	19.7085	160.2795	Wave_Mormyroid	Tuberous	Yes	Osteoglossiform
Gymnarchus_niloticus	GN2	Gymnarchidae	0	1.87725	92.279	138.682	24.282	59.954	205.36	39.0615	561.49575	Wave_Mormyroid	Tuberous	Yes	Osteoglossiform
Gymnarchus_niloticus	GN3	Gymnarchidae	0	1.2945	79.014	103.758	15.816	31.277	122.38	39.579	393.1185	Wave_Mormyroid	Tuberous	Yes	Osteoglossiform
Gymnocorymbus_ternetzi	GT1	Characidae	1.6	0.17472	1.1371	1.955199999	3.0184	0.71456	1.377	2.9356	11.31258	Outgroup_Otophysans	None	No	Otophysan
Gymnocorymbus_ternetzi	GT2	Characidae	1.51	0.16608	1.3885	2.222799999	3.3508	0.57472	1.6638	2.9864	12.3531	Outgroup_Otophysans	None	No	Otophysan
Gymnocorymbus_ternetzi	GT3	Characidae	1.48	0.219839999	1.6918	2.6456	4.4432	0.816	1.9712	3.7112	15.49884	Outgroup_Otophysans	None	No	Otophysan
Gymnotus_carapo	GC1	Gymnotidae	3.93	0.458879999	5.1504	9.6016	3.3136	3.9208	8.256	5.4408	36.14208	Pulse_Gymnotiform	Tuberous	Yes	Otophysan
Gymnotus_carapo	GC2	Gymnotidae	38.33	1.0113	11.349	25.385	7.821	8.9775	22.064	9.993	86.6008	Pulse_Gymnotiform	Tuberous	Yes	Otophysan
Gymnotus_javari	GJ1	Gymnotidae	8.44	0.5708	5.975	8.258	3.2455	3.266	7.664	5.434	34.4133	Pulse_Gymnotiform	Tuberous	Yes	Otophysan
Gymnotus_javari	GJ2	Gymnotidae	2.82	0.24064	2.9056	4.2176	1.7245	2.0008	4.0012	2.0396	17.12994	Pulse_Gymnotiform	Tuberous	Yes	Otophysan
Kryptopterus_vitreolus	KV1	Siluridae	0.58	0.06928	0.708159999	1.06943998	0.8896	0.498559999	1.09016001	0.946399999	5.271599987	Nonelectric_Siluriforms	Only_ampullary	No	Otophysan
Kryptopterus_vitreolus	KV2	Siluridae	0.49	0.05824	0.62736	1.03127999	0.80784	0.3912	0.94232	0.93456	4.79279999	Nonelectric_Siluriforms	Only_ampullary	No	Otophysan
Kryptopterus_vitreolus	KV4	Siluridae	0.41	0.053439999	0.655999999	1.0736	0.74256	0.356479999	0.988479999	0.78336	4.653919996	Nonelectric_Siluriforms	Only_ampullary	No	Otophysan
Kryptopterus_vitreolus	KV3	Siluridae	0.6	0.05264	0.53472	0.96832	0.70592	0.34544	0.81632	0.5712	3.99456	Nonelectric_Siluriforms	Only_ampullary	No	Otophysan
Microglanis_iheringi	MI2	Pseudopimelodidae	1.07	0.27552	1.2242	1.9365	0.534239999	0.37984	0.997599999	1.2704	6.618299998	Nonelectric_Siluriforms	Only_ampullary	No	Otophysan
Microglanis_iheringi	MI3	Pseudopimelodidae	0.87	0.235359999	1.1616	1.3168	0.34159999	0.217119999	0.51264	1.004	4.789119988	Nonelectric_Siluriforms	Only_ampullary	No	Otophysan
Microglanis_iheringi	MI4	Pseudopimelodidae	3.04	0.45056	1.6949	2.7996	0.774879999	0.7152	1.6779	1.8518	9.964839999	Nonelectric_Siluriforms	Only_ampullary	No	Otophysan
Mormyrus_tapirus	MT3	Mormyridae	7.33	0.3798	23.738	35.845	10.113	15.551	102.92	9.882	198.4288	Pulse_Mormyroid	Tuberous	Yes	Osteoglossiform
Mormyrus_tapirus	MT1	Mormyridae	20.41	0.7647	37.32966667	49.86816667	14.264	36.06733333	228.2666667	17.51023334	384.0707667	Pulse_Mormyroid	Tuberous	Yes	Osteoglossiform
Mormyrus_tapirus	MT2	Mormyridae	13.35	0.4815	27.51	64.3005	13.7745	23.49	165.9	10.683	306.1395	Pulse_Mormyroid	Tuberous	Yes	Osteoglossiform
Mormyrus_tapirus	MT4	Mormyridae	30.17	0.6393	37.9965	86.6715	15.2295	26.037	226.935	19.28025	412.78905	Pulse_Mormyroid	Tuberous	Yes	Osteoglossiform
Mormyrus_tapirus	MT5	Mormyridae	38.76	0.4062	36.0825	96.239	16.197	29.3865	280.13	11.2235	469.6647	Pulse_Mormyroid	Tuberous	Yes	Osteoglossiform
Mormyrus_tapirus	MT6	Mormyridae	9.78	0.3982	20.529	39.855	9.856	15.072	95.803	10.0765	191.5897	Pulse_Mormyroid	Tuberous	Yes	Osteoglossiform
Pantodon_buchholzi	PB2	Pantodontidae	7.78	0.4684	6.77	4.893	5.799	1.5415	1.499	5.1525	26.1234	Outgroup_Ossteoglossiforms	None	No	Osteoglossiform
Pantodon_buchholzi	PB3	Pantodontidae	7.27	0.4688	8.286	7.065	6.149	1.476	1.604	6.4185	31.4673	Outgroup_Ossteoglossiforms	None	No	Osteoglossiform
Pantodon_buchholzi	PB1	Pantodontidae	10.49	0.3888	7.323	5.463	6.073	1.25	1.4445	5.4355	27.3778	Outgroup_Ossteoglossiforms	None	No	Osteoglossiform
Pantodon_buchholzi	PB4	Pantodontidae	10.76	0.5468	7.664	5.636	6.604	1.474	1.238	6.0004	29.1632	Outgroup_Ossteoglossiforms	None	No	Osteoglossiform
Pantodon_buchholzi	PB5	Pantodontidae	10.16	0.6298	7.977666667	5.986	6.926	1.854	1.773333333	6.123566667	31.27036667	Outgroup_Ossteoglossiforms	None	No	Osteoglossiform
Petrocephalus_tenuicauda	PSP66	Mormyridae	2.831	0.201333333	7.742	9.6505	4.979666667	6.320666667	14.682	3.402533333	46.9787	Pulse_Mormyroid	Tuberous	Yes	Osteoglossiform
Petrocephalus_tenuicauda	PSP67	Mormyridae	0.849	0.1324	4.347	5.4345	2.9575	4.4015	8.966	2.7362	28.9751	Pulse_Mormyroid	Tuberous	Yes	Osteoglossiform
Petrocephalus_tenuicauda	PSP64	Mormyridae	14.65	0.2862	12.48	19.8605	7.9695	10.995	34.701	6.2123	92.5045	Pulse_Mormyroid	Tuberous	Yes	Osteoglossiform
Petrocephalus_tenuicauda	PSP65	Mormyridae	7.34	0.3084	12.377	17.071	8.115	10.671	32.908	7.409	88.8594	Pulse_Mormyroid	Tuberous	Yes	Osteoglossiform
Petrocephalus_tenuicauda	PSP68	Mormyridae	22.57	0.6543	15.0165	24.2595	7.53	14.0955	52.7175	10.7925	125.0658	Pulse_Mormyroid	Tuberous	Yes	Osteoglossiform
Phenacogrammus_interruptus	PI4	Alestidae	1.51	0.186399999	2.7504	2.9272	6.3784	1.0877	2.7284	4.286	20.3445	Outgroup_Otophysans	None	No	Otophysan
Phenacogrammus_interruptus	PI3	Alestidae	1.08	0.13184	1.8757	1.928	4.7668	0.77072	1.9982	3.336	14.80726	Outgroup_Otophysans	None	No	Otophysan
Phenacogrammus_interruptus	PI1	Alestidae	1.42	0.09344	1.3221	1.8402	3.2432	0.54096	1.2326	2.9536	11.2261	Outgroup_Otophysans	None	No	Otophysan
Phenacogrammus_interruptus	PI2	Alestidae	1.32	0.08256	1.424866667	1.981333333	3.221066667	0.575893333	1.301633333	2.6352	11.22255333	Outgroup_Otophysans	None	No	Otophysan
Steatogenys_elegans	SE1	Rhamphichthyidae	9.28	0.505733333	5.952333333	16.53133333	4.5	7.005	20.57533333	7.494	62.56373333	Pulse_Gymnotiform	Tuberous	Yes	Otophysan
Steatogenys_elegans	SE2	Rhamphichthyidae	8.04	0.627	5.339	17.077	4.291	6.094	16.747	7.748	57.923	Pulse_Gymnotiform	Tuberous	Yes	Otophysan
Sternarchella_calhamazon	SC1	Apteronotidae	6.05	0.47959999	3.453	11.825	3.1285	3.3335	8.914	3.8285	34.96209999	Wave_Gymnotiform	Tuberous	Yes	Otophysan
Sternarchella_calhamazon	SC2	Apteronotidae	8.72	0.4045999	2.817	11.082	2.2965	3.1945	8.6695	4.451	32.9150999	Wave_Gymnotiform	Tuberous	Yes	Otophysan
Sternarchella_orthos	SO1	Apteronotidae	56.98	3.0132	15.143	49.703	10.512	17.23	46.823	22.185	164.6092	Wave_Gymnotiform	Tuberous	Yes	Otophysan
Sternopygus_macrurus	SM1	Sternopygidae	17.986	0.8913	10.593	18.60533333	9.842	10.187	22.163	10.212	82.49363333	Wave_Gymnotiform	Tuberous	Yes	Otophysan
Sternopygus_macrurus	SM2	Sternopygidae	3.83	0.3728	5.861	11.806	5.512	5.927	11.751	8.621	49.8508	Wave_Gymnotiform	Tuberous	Yes	Otophysan
Sternopygus_macrurus	SM3	Sternopygidae	45.78	1.341	15.946	29.858	12.888	13.484	34.641	14.153	122.311	Wave_Gymnotiform	Tuberous	Yes	Otophysan
Synodontis_multipunctatus	SyM1	Mochokidae	14.82	3.8768	17.058	22.502	13.193	6.456	60.914	23.426	143.549	Synodontis_Siluriforms	Only_ampullary	Yes	Otophysan
Synodontis_multipunctatus	SyM2	Mochokidae	15.08	3.8153	17.40266667	24.83533333	15.48433333	8.0505	65.67666667	25.01533333	159.0503667	Synodontis_Siluriforms	Only_ampullary	Yes	Otophysan
Synodontis_ocellifer	SyO2	Mochokidae	39.83	4.14	20.218	28.249	15.86	8.9766	52.276	30.339	155.9186	Synodontis_Siluriforms	Only_ampullary	Yes	Otophysan
Synodontis_petricola	SP3	Mochokidae	3.73	0.9944	5.207	8.59	6.146	2.777	12.017	7.104	42.8354	Synodontis_Siluriforms	Only_ampullary	Yes	Otophysan
Synodontis_petricola	SP4	Mochokidae	2.43	0.731	4.4955	6.648	4.516	2.8195	9.121	6.584	34.915	Synodontis_Siluriforms	Only_ampullary	Yes	Otophysan
Synodontis_petricola	SP5	Mochokidae	4	1.0454	5.548	7.544	5.333	2.498	11.525	8.259	41.7524	Synodontis_Siluriforms	Only_ampullary	Yes	Otophysan
Synodontis_soloni	SS1	Mochokidae	25.51	2.6932	9.843	16.853	8.751	3.9645	29.301	13.064	84.4697	Synodontis_Siluriforms	Only_ampullary	Yes	Otophysan
Synodontis_soloni	SS2	Mochokidae	38.91	3.0173	11.19	20.192	10.301	3.687	28.71	15.977	93.0743	Synodontis_Siluriforms	Only_ampullary	Yes	Otophysan
Xenomystus_nigri	XN8	Notopteridae	4.5	2.212	14.726	6.124	10.12	2.2625	5.322	6.1688	46.9353	Outgroup_Ossteoglossiforms	Only_ampullary	No	Osteoglossiform
Xenomystus_nigri	XN9	Notopteridae	3.29	0.9372	8.656	4.2205	6.378	1.6385	3.609	4.2055	29.6447	Outgroup_Ossteoglossiforms	Only_ampullary	No	Osteoglossiform
Xenomystus_nigri	XN12	Notopteridae	3.93	1.0875	7.536	3.7855	4.19	1.2505	3.2765	3.8192	24.9452	Outgroup_Ossteoglossiforms	Only_ampullary	No	Osteoglossiform
Xenomystus_nigri	XN10	Notopteridae	5.4	1.028	9.342	5.348	6.359	1.66	3.667	4.7012	32.1052	Outgroup_Ossteoglossiforms	Only_ampullary	No	Osteoglossiform
Xenomystus_nigri	XN13	Notopteridae	8.14	1.2145	14.655	6.57	8.201	2.5035	5.49	6.287	44.921	Outgroup_Ossteoglossiforms	Only_ampullary	No	Osteoglossiform
