# Supplementary material for: Convergent mosaic brain evolution is associated with the evolution of novel electrosensory systems in teleost fishes
Source: eLife journal article supplement (doi:10.7554/elife.74159), 2022-06-17
Supplement: supp [file elife-74159-supp-v1.zip › elife_poa_e74159_Supplementary_file_2.csv]

Updated_Order	Order	Family	Genus	Species	Subspecies	Genus_Species	Sample size	Sex	Method	Body weight (g)	Brain weight (g)	Standard length (cm)	Total length (cm)	Age Class	Species Name in original article	Reference	Remark
Acipenseriformes	Acipenseriformes	Acipenseridae	Acipenser	transmontanus		Acipenser_transmontanus	6	unknown	Mass	3520	0.65			unknown		Albert JS et al. (1999) Proceedings of the 5th Indo-Pacific Fish Conference (Seret B, Sire J-Y, eds), pp 647-656
Acipenseriformes	Acipenseriformes	Acipenseridae	Scaphirhynchus	platorynchus		Scaphirhynchus_platorynchus	1	unknown	Mass	510	0.236			unknown		Bauchot R, Diagne M, Platel R, Ridet J-M, Bauchot M-L. in Fishbase. www.fishbase.org. date of access: Apr.-13-17
Acipenseriformes	Acipenseriformes	Acipenseridae	Scaphirhynchus	platorynchus		Scaphirhynchus_platorynchus	1	unknown	Mass	510	0.2567			unknown		Bauchot R, Diagne M, Platel R, Ridet J-M, Bauchot M-L. in Fishbase. www.fishbase.org. date of access: Apr.-13-17
Amiiformes	Amiiformes	Amiidae	Amia	calva		Amia_calva	2	unknown	Mass	727	0.3755			unknown		Bauchot R, Diagne M, Platel R, Ridet J-M, Bauchot M-L. in Fishbase. www.fishbase.org. date of access: Apr.-13-17
Anguilliformes	Anguilliformes	Anguillidae	Anguilla	anguilla		Anguilla_anguilla	1	unknown	Mass	650	0.17			unknown		Dubois E (1913) On the relation between the quantity of brain and the size of the body in vertebrates
Anguilliformes	Anguilliformes	Congridae	Ariosoma	balearicum		Ariosoma_balearicum	1	unknown	Mass	33	0.0546	25		unknown		Bauchot R, Diagne M, Platel R, Ridet J-M, Bauchot M-L. in Fishbase. www.fishbase.org. date of access: Apr.-13-17
Anguilliformes	Anguilliformes	Congridae	Conger	conger		Conger_conger	1	unknown	Mass	2200	0.525		101.5	Adult		Bauchot R, Diagne M, Platel R, Ridet J-M, Bauchot M-L. in Fishbase. www.fishbase.org. date of access: Apr.-13-17
Anguilliformes	Anguilliformes	Congridae	Conger	conger		Conger_conger	1	unknown	Mass	2250	0.488			Adult		Bauchot R, Diagne M, Platel R, Ridet J-M, Bauchot M-L. in Fishbase. www.fishbase.org. date of access: Apr.-13-17
Anguilliformes	Anguilliformes	Congridae	Conger	conger		Conger_conger	1	unknown	Mass	2350	0.502		97	Adult		Bauchot R, Diagne M, Platel R, Ridet J-M, Bauchot M-L. in Fishbase. www.fishbase.org. date of access: Apr.-13-17
Anguilliformes	Anguilliformes	Congridae	Conger	conger		Conger_conger	1	unknown	Mass	2400	0.538		101	Adult		Bauchot R, Diagne M, Platel R, Ridet J-M, Bauchot M-L. in Fishbase. www.fishbase.org. date of access: Apr.-13-17
Anguilliformes	Anguilliformes	Congridae	Conger	conger		Conger_conger	1	unknown	Mass	2450	0.482		97.5	Adult		Bauchot R, Diagne M, Platel R, Ridet J-M, Bauchot M-L. in Fishbase. www.fishbase.org. date of access: Apr.-13-17
Anguilliformes	Anguilliformes	Congridae	Conger	conger		Conger_conger	1	unknown	Mass	2550	0.625		105.5	Adult		Bauchot R, Diagne M, Platel R, Ridet J-M, Bauchot M-L. in Fishbase. www.fishbase.org. date of access: Apr.-13-17
Anguilliformes	Anguilliformes	Congridae	Conger	conger		Conger_conger	1	unknown	Mass	2700	0.489		98.5	Adult		Bauchot R, Diagne M, Platel R, Ridet J-M, Bauchot M-L. in Fishbase. www.fishbase.org. date of access: Apr.-13-17
Anguilliformes	Anguilliformes	Congridae	Conger	conger		Conger_conger	1	unknown	Mass	2820	0.516		106.5	Adult		Bauchot R, Diagne M, Platel R, Ridet J-M, Bauchot M-L. in Fishbase. www.fishbase.org. date of access: Apr.-13-17
Anguilliformes	Anguilliformes	Congridae	Conger	conger		Conger_conger	1	unknown	Mass	2950	0.533		105.8	Adult		Bauchot R, Diagne M, Platel R, Ridet J-M, Bauchot M-L. in Fishbase. www.fishbase.org. date of access: Apr.-13-17
Anguilliformes	Anguilliformes	Congridae	Conger	conger		Conger_conger	1	unknown	Mass	3000	0.575		105	Adult		Bauchot R, Diagne M, Platel R, Ridet J-M, Bauchot M-L. in Fishbase. www.fishbase.org. date of access: Apr.-13-17
Anguilliformes	Anguilliformes	Congridae	Conger	conger		Conger_conger	1	unknown	Mass	3100	0.491		104	Adult		Bauchot R, Diagne M, Platel R, Ridet J-M, Bauchot M-L. in Fishbase. www.fishbase.org. date of access: Apr.-13-17
Anguilliformes	Anguilliformes	Congridae	Conger	conger		Conger_conger	1	unknown	Mass	3250	0.534		107.8	Adult		Bauchot R, Diagne M, Platel R, Ridet J-M, Bauchot M-L. in Fishbase. www.fishbase.org. date of access: Apr.-13-17
Anguilliformes	Anguilliformes	Congridae	Conger	conger		Conger_conger	1	unknown	Mass	3300	0.544		105.5	Adult		Bauchot R, Diagne M, Platel R, Ridet J-M, Bauchot M-L. in Fishbase. www.fishbase.org. date of access: Apr.-13-17
Anguilliformes	Anguilliformes	Congridae	Conger	conger		Conger_conger	1	unknown	Mass	3500	0.571		115	Adult		Bauchot R, Diagne M, Platel R, Ridet J-M, Bauchot M-L. in Fishbase. www.fishbase.org. date of access: Apr.-13-17
Anguilliformes	Anguilliformes	Congridae	Conger	conger		Conger_conger	1	unknown	Mass	3500	0.602		113	Adult		Bauchot R, Diagne M, Platel R, Ridet J-M, Bauchot M-L. in Fishbase. www.fishbase.org. date of access: Apr.-13-17
Anguilliformes	Anguilliformes	Congridae	Conger	conger		Conger_conger	1	unknown	Mass	3650	0.578		113	Adult		Bauchot R, Diagne M, Platel R, Ridet J-M, Bauchot M-L. in Fishbase. www.fishbase.org. date of access: Apr.-13-17
Anguilliformes	Anguilliformes	Congridae	Conger	conger		Conger_conger	1	unknown	Mass	4000	0.578		118	Adult		Bauchot R, Diagne M, Platel R, Ridet J-M, Bauchot M-L. in Fishbase. www.fishbase.org. date of access: Apr.-13-17
Anguilliformes	Anguilliformes	Congridae	Conger	conger		Conger_conger	1	unknown	Mass	4100	0.612		121	Adult		Bauchot R, Diagne M, Platel R, Ridet J-M, Bauchot M-L. in Fishbase. www.fishbase.org. date of access: Apr.-13-17
Anguilliformes	Anguilliformes	Congridae	Conger	conger		Conger_conger	1	unknown	Mass	4300	0.626		112	Adult		Bauchot R, Diagne M, Platel R, Ridet J-M, Bauchot M-L. in Fishbase. www.fishbase.org. date of access: Apr.-13-17
Anguilliformes	Anguilliformes	Congridae	Conger	conger		Conger_conger	1	unknown	Mass	4500	0.625		121.5	Adult		Bauchot R, Diagne M, Platel R, Ridet J-M, Bauchot M-L. in Fishbase. www.fishbase.org. date of access: Apr.-13-17
Anguilliformes	Anguilliformes	Congridae	Conger	conger		Conger_conger	1	unknown	Mass	4500	0.689		122	Adult		Bauchot R, Diagne M, Platel R, Ridet J-M, Bauchot M-L. in Fishbase. www.fishbase.org. date of access: Apr.-13-17
Anguilliformes	Anguilliformes	Congridae	Conger	conger		Conger_conger	1	unknown	Mass	4650	0.628		114.5	Adult		Bauchot R, Diagne M, Platel R, Ridet J-M, Bauchot M-L. in Fishbase. www.fishbase.org. date of access: Apr.-13-17
Anguilliformes	Anguilliformes	Congridae	Conger	conger		Conger_conger	1	unknown	Mass	4700	0.659		125	Adult		Bauchot R, Diagne M, Platel R, Ridet J-M, Bauchot M-L. in Fishbase. www.fishbase.org. date of access: Apr.-13-17
Anguilliformes	Anguilliformes	Congridae	Conger	conger		Conger_conger	1	unknown	Mass	5000	0.605			Adult		Bauchot R, Diagne M, Platel R, Ridet J-M, Bauchot M-L. in Fishbase. www.fishbase.org. date of access: Apr.-13-17
Anguilliformes	Anguilliformes	Congridae	Conger	conger		Conger_conger	1	unknown	Mass	5000	0.621		121	Adult		Bauchot R, Diagne M, Platel R, Ridet J-M, Bauchot M-L. in Fishbase. www.fishbase.org. date of access: Apr.-13-17
Anguilliformes	Anguilliformes	Congridae	Conger	conger		Conger_conger	1	unknown	Mass	5200	0.705		127.5	Adult		Bauchot R, Diagne M, Platel R, Ridet J-M, Bauchot M-L. in Fishbase. www.fishbase.org. date of access: Apr.-13-17
Anguilliformes	Anguilliformes	Congridae	Conger	conger		Conger_conger	1	unknown	Mass	5300	0.727		129.5	Adult		Bauchot R, Diagne M, Platel R, Ridet J-M, Bauchot M-L. in Fishbase. www.fishbase.org. date of access: Apr.-13-17
Anguilliformes	Anguilliformes	Congridae	Conger	conger		Conger_conger	1	unknown	Mass	5350	0.718		129.5	Adult		Bauchot R, Diagne M, Platel R, Ridet J-M, Bauchot M-L. in Fishbase. www.fishbase.org. date of access: Apr.-13-17
Anguilliformes	Anguilliformes	Congridae	Conger	conger		Conger_conger	1	unknown	Mass	6700	0.611		131	Adult		Bauchot R, Diagne M, Platel R, Ridet J-M, Bauchot M-L. in Fishbase. www.fishbase.org. date of access: Apr.-13-17
Anguilliformes	Anguilliformes	Congridae	Conger	conger		Conger_conger	1	unknown	Mass	10500	0.811			Adult		Bauchot R, Diagne M, Platel R, Ridet J-M, Bauchot M-L. in Fishbase. www.fishbase.org. date of access: Apr.-13-17
Anguilliformes	Anguilliformes	Congridae	Conger	conger		Conger_conger	1	unknown	Mass	10000	1.05			Adult	Conger vulgaris	Dubois E (1913) On the relation between the quantity of brain and the size of the body in vertebrates
Anguilliformes	Anguilliformes	Congridae	Conger	conger		Conger_conger	1	unknown	Mass	33.7	0.111		31.5	unknown		Bauchot R, Diagne M, Platel R, Ridet J-M, Bauchot M-L. in Fishbase. www.fishbase.org. date of access: Apr.-13-17
Anguilliformes	Anguilliformes	Congridae	Conger	conger		Conger_conger	1	unknown	Mass	538	0.327		67.5	unknown		Bauchot R, Diagne M, Platel R, Ridet J-M, Bauchot M-L. in Fishbase. www.fishbase.org. date of access: Apr.-13-17
Anguilliformes	Anguilliformes	Congridae	Conger	conger		Conger_conger	1	unknown	Mass	690	0.412		69	unknown		Bauchot R, Diagne M, Platel R, Ridet J-M, Bauchot M-L. in Fishbase. www.fishbase.org. date of access: Apr.-13-17
Anguilliformes	Anguilliformes	Congridae	Conger	conger		Conger_conger	1	unknown	Mass	950	0.405		79.5	unknown		Bauchot R, Diagne M, Platel R, Ridet J-M, Bauchot M-L. in Fishbase. www.fishbase.org. date of access: Apr.-13-17
Anguilliformes	Anguilliformes	Congridae	Conger	conger		Conger_conger	1	unknown	Mass	956	0.382		80	unknown		Bauchot R, Diagne M, Platel R, Ridet J-M, Bauchot M-L. in Fishbase. www.fishbase.org. date of access: Apr.-13-17
Anguilliformes	Anguilliformes	Congridae	Conger	conger		Conger_conger	1	unknown	Mass	978	0.451		80.2	unknown		Bauchot R, Diagne M, Platel R, Ridet J-M, Bauchot M-L. in Fishbase. www.fishbase.org. date of access: Apr.-13-17
Anguilliformes	Anguilliformes	Congridae	Conger	conger		Conger_conger	1	unknown	Mass	1242	0.474		82.5	unknown		Bauchot R, Diagne M, Platel R, Ridet J-M, Bauchot M-L. in Fishbase. www.fishbase.org. date of access: Apr.-13-17
Anguilliformes	Anguilliformes	Congridae	Conger	conger		Conger_conger	1	unknown	Mass	1250	0.437		91.5	unknown		Bauchot R, Diagne M, Platel R, Ridet J-M, Bauchot M-L. in Fishbase. www.fishbase.org. date of access: Apr.-13-17
Anguilliformes	Anguilliformes	Congridae	Conger	conger		Conger_conger	1	unknown	Mass	1350	0.424		83	unknown		Bauchot R, Diagne M, Platel R, Ridet J-M, Bauchot M-L. in Fishbase. www.fishbase.org. date of access: Apr.-13-17
Anguilliformes	Anguilliformes	Congridae	Conger	conger		Conger_conger	1	unknown	Mass	1509	0.536		85.2	unknown		Bauchot R, Diagne M, Platel R, Ridet J-M, Bauchot M-L. in Fishbase. www.fishbase.org. date of access: Apr.-13-17
Anguilliformes	Anguilliformes	Congridae	Conger	conger		Conger_conger	1	unknown	Mass	1550	0.456		86	unknown		Bauchot R, Diagne M, Platel R, Ridet J-M, Bauchot M-L. in Fishbase. www.fishbase.org. date of access: Apr.-13-17
Anguilliformes	Anguilliformes	Congridae	Conger	conger		Conger_conger	1	unknown	Mass	1600	0.49		75	unknown		Bauchot R, Diagne M, Platel R, Ridet J-M, Bauchot M-L. in Fishbase. www.fishbase.org. date of access: Apr.-13-17
Anguilliformes	Anguilliformes	Congridae	Conger	conger		Conger_conger	1	unknown	Mass	1740	0.446		90.8	unknown		Bauchot R, Diagne M, Platel R, Ridet J-M, Bauchot M-L. in Fishbase. www.fishbase.org. date of access: Apr.-13-17
Anguilliformes	Anguilliformes	Congridae	Conger	conger		Conger_conger	1	unknown	Mass	1750	0.463			unknown		Bauchot R, Diagne M, Platel R, Ridet J-M, Bauchot M-L. in Fishbase. www.fishbase.org. date of access: Apr.-13-17
Anguilliformes	Anguilliformes	Congridae	Conger	conger		Conger_conger	1	unknown	Mass	1790	0.517		90.2	unknown		Bauchot R, Diagne M, Platel R, Ridet J-M, Bauchot M-L. in Fishbase. www.fishbase.org. date of access: Apr.-13-17
Anguilliformes	Anguilliformes	Congridae	Conger	conger		Conger_conger	1	unknown	Mass	1800	0.404		89	unknown		Bauchot R, Diagne M, Platel R, Ridet J-M, Bauchot M-L. in Fishbase. www.fishbase.org. date of access: Apr.-13-17
Anguilliformes	Anguilliformes	Congridae	Conger	conger		Conger_conger	1	unknown	Mass	2000	0.491		89.5	unknown		Bauchot R, Diagne M, Platel R, Ridet J-M, Bauchot M-L. in Fishbase. www.fishbase.org. date of access: Apr.-13-17
Anguilliformes	Anguilliformes	Muraenidae	Echidna	nebulosa		Echidna_nebulosa	1	unknown	Mass	26	0.032		28.2	unknown		Bauchot R, Diagne M, Platel R, Ridet J-M, Bauchot M-L. in Fishbase. www.fishbase.org. date of access: Apr.-13-17
Anguilliformes	Anguilliformes	Muraenidae	Echidna	nebulosa		Echidna_nebulosa	1	unknown	Mass	44.7	0.045			unknown		Iglesias TL et al. (2015) J. Evol. Biol. 28:1080-1090
Anguilliformes	Anguilliformes	Muraenidae	Enchelynassa	canina		Enchelynassa_canina	1	unknown	Mass	555	0.198		73	unknown		Bauchot R, Diagne M, Platel R, Ridet J-M, Bauchot M-L. in Fishbase. www.fishbase.org. date of access: Apr.-13-17
Anguilliformes	Anguilliformes	Muraenidae	Gymnothorax	buroensis		Gymnothorax_buroensis	1	unknown	Mass	106	0.131		37.2	unknown		Bauchot R, Diagne M, Platel R, Ridet J-M, Bauchot M-L. in Fishbase. www.fishbase.org. date of access: Apr.-13-17
Anguilliformes	Anguilliformes	Muraenidae	Gymnothorax	eurostus		Gymnothorax_eurostus	1	unknown	Mass	48	0.099			unknown		Bauchot R, Diagne M, Platel R, Ridet J-M, Bauchot M-L. in Fishbase. www.fishbase.org. date of access: Apr.-13-17
Anguilliformes	Anguilliformes	Muraenidae	Gymnothorax	favagineus		Gymnothorax_favagineus	1	unknown	Mass	900	0.165			unknown		Bauchot R, Diagne M, Platel R, Ridet J-M, Bauchot M-L. in Fishbase. www.fishbase.org. date of access: Apr.-13-17
Anguilliformes	Anguilliformes	Muraenidae	Gymnothorax	flavimarginatus		Gymnothorax_flavimarginatus	1	unknown	Mass	590	0.233		71	Adult		Bauchot R, Diagne M, Platel R, Ridet J-M, Bauchot M-L. in Fishbase. www.fishbase.org. date of access: Apr.-13-17
Anguilliformes	Anguilliformes	Muraenidae	Gymnothorax	flavimarginatus		Gymnothorax_flavimarginatus	1	unknown	Mass	1475	0.259		88.5	Adult		Bauchot R, Diagne M, Platel R, Ridet J-M, Bauchot M-L. in Fishbase. www.fishbase.org. date of access: Apr.-13-17
Anguilliformes	Anguilliformes	Muraenidae	Gymnothorax	funebris		Gymnothorax_funebris	1	unknown	Mass	3510	0.51			unknown		Crile G and Quiring DP (1940) Ohio J Sci 40:219-259.
Anguilliformes	Anguilliformes	Muraenidae	Gymnothorax	griseus		Gymnothorax_griseus	1	unknown	Mass	123	0.072			unknown		Bauchot R, Diagne M, Platel R, Ridet J-M, Bauchot M-L. in Fishbase. www.fishbase.org. date of access: Apr.-13-17
Anguilliformes	Anguilliformes	Muraenidae	Gymnothorax	javanicus		Gymnothorax_javanicus	1	unknown	Mass	8100	0.654		142	unknown		Bauchot R, Diagne M, Platel R, Ridet J-M, Bauchot M-L. in Fishbase. www.fishbase.org. date of access: Apr.-13-17
Anguilliformes	Anguilliformes	Muraenidae	Gymnothorax	margaritophorus		Gymnothorax_margaritophorus	1	unknown	Mass	207	0.136			unknown		Bauchot R, Diagne M, Platel R, Ridet J-M, Bauchot M-L. in Fishbase. www.fishbase.org. date of access: Apr.-13-17
Anguilliformes	Anguilliformes	Muraenidae	Gymnothorax	melatremus		Gymnothorax_melatremus	1	unknown	Mass	3	0.009		13.2	unknown		Bauchot R, Diagne M, Platel R, Ridet J-M, Bauchot M-L. in Fishbase. www.fishbase.org. date of access: Apr.-13-17
Anguilliformes	Anguilliformes	Muraenidae	Gymnothorax	meleagris		Gymnothorax_meleagris	1	unknown	Mass	206	0.686			unknown		Bauchot R, Diagne M, Platel R, Ridet J-M, Bauchot M-L. in Fishbase. www.fishbase.org. date of access: Apr.-13-17
Anguilliformes	Anguilliformes	Muraenidae	Gymnothorax	pictus		Gymnothorax_pictus	1	unknown	Mass	425	0.202		62	unknown		Bauchot R, Diagne M, Platel R, Ridet J-M, Bauchot M-L. in Fishbase. www.fishbase.org. date of access: Apr.-13-17
Anguilliformes	Anguilliformes	Muraenidae	Gymnothorax	rueppellii		Gymnothorax_rueppellii	1	unknown	Mass	32.6	0.052		28.9	unknown		Bauchot R, Diagne M, Platel R, Ridet J-M, Bauchot M-L. in Fishbase. www.fishbase.org. date of access: Apr.-13-17
Anguilliformes	Anguilliformes	Muraenidae	Gymnothorax	undulatus		Gymnothorax_undulatus	1	unknown	Mass	1050	0.202		78	Adult		Bauchot R, Diagne M, Platel R, Ridet J-M, Bauchot M-L. in Fishbase. www.fishbase.org. date of access: Apr.-13-17
Anguilliformes	Anguilliformes	Muraenidae	Gymnothorax	undulatus		Gymnothorax_undulatus	1	unknown	Mass	1050	0.204			Adult		Bauchot R, Diagne M, Platel R, Ridet J-M, Bauchot M-L. in Fishbase. www.fishbase.org. date of access: Apr.-13-17
Anguilliformes	Anguilliformes	Muraenidae	Gymnothorax	undulatus		Gymnothorax_undulatus	1	unknown	Mass	2280	0.306		120	Adult		Bauchot R, Diagne M, Platel R, Ridet J-M, Bauchot M-L. in Fishbase. www.fishbase.org. date of access: Apr.-13-17
Anguilliformes	Anguilliformes	Muraenidae	Gymnothorax	undulatus		Gymnothorax_undulatus	1	unknown	Mass	415	0.178		65	unknown		Bauchot R, Diagne M, Platel R, Ridet J-M, Bauchot M-L. in Fishbase. www.fishbase.org. date of access: Apr.-13-17
Anguilliformes	Anguilliformes	Muraenidae	Gymnothorax	undulatus		Gymnothorax_undulatus	1	unknown	Mass	675	0.189			unknown		Bauchot R, Diagne M, Platel R, Ridet J-M, Bauchot M-L. in Fishbase. www.fishbase.org. date of access: Apr.-13-17
Anguilliformes	Anguilliformes	Muraenidae	Gymnothorax	zonipectis		Gymnothorax_zonipectis	1	unknown	Mass	11.2	0.032		21.2	unknown		Bauchot R, Diagne M, Platel R, Ridet J-M, Bauchot M-L. in Fishbase. www.fishbase.org. date of access: Apr.-13-17
Anguilliformes	Anguilliformes	Nemichthyidae	Nemichthys	scolopaceus		Nemichthys_scolopaceus	1	unknown	Mass	14	0.0316	10		unknown		Bauchot R, Diagne M, Platel R, Ridet J-M, Bauchot M-L. in Fishbase. www.fishbase.org. date of access: Apr.-13-17
Anguilliformes	Anguilliformes	Nemichthyidae	Nemichthys	scolopaceus		Nemichthys_scolopaceus	1	unknown	Mass	58	0.0417		11.2	unknown		Bauchot R, Diagne M, Platel R, Ridet J-M, Bauchot M-L. in Fishbase. www.fishbase.org. date of access: Apr.-13-17
Anguilliformes	Anguilliformes	Serrivomeridae	Serrivomer	beanii		Serrivomer_beanii	1	unknown	Mass	136	0.0346			unknown		Bauchot R, Diagne M, Platel R, Ridet J-M, Bauchot M-L. in Fishbase. www.fishbase.org. date of access: Apr.-13-17
Anguilliformes	Anguilliformes	Serrivomeridae	Serrivomer	beanii		Serrivomer_beanii	1	unknown	Mass	71	0.025			unknown		Bauchot R, Diagne M, Platel R, Ridet J-M, Bauchot M-L. in Fishbase. www.fishbase.org. date of access: Apr.-13-17
Anguilliformes	Anguilliformes	Synaphobranchidae	Simenchelys	parasitica		Simenchelys_parasitica	1	unknown	Mass	91	0.244			unknown		Bauchot R, Diagne M, Platel R, Ridet J-M, Bauchot M-L. in Fishbase. www.fishbase.org. date of access: Apr.-13-17
Anguilliformes	Anguilliformes	Synaphobranchidae	Synaphobranchus	kaupii		Synaphobranchus_kaupii	1	unknown	Mass	80	0.141	37	38	unknown		Bauchot R, Diagne M, Platel R, Ridet J-M, Bauchot M-L. in Fishbase. www.fishbase.org. date of access: Apr.-13-17
Anguilliformes	Anguilliformes	Synaphobranchidae	Synaphobranchus	kaupii		Synaphobranchus_kaupii	1	unknown	Mass	1.1	0.0164			unknown		Bauchot R, Diagne M, Platel R, Ridet J-M, Bauchot M-L. in Fishbase. www.fishbase.org. date of access: Apr.-13-17
Anguilliformes	Anguilliformes	Synaphobranchidae	Synaphobranchus	kaupii		Synaphobranchus_kaupii	1	unknown	Mass	5.8	0.0283			unknown		Bauchot R, Diagne M, Platel R, Ridet J-M, Bauchot M-L. in Fishbase. www.fishbase.org. date of access: Apr.-13-17
Anguilliformes	Anguilliformes	Synaphobranchidae	Synaphobranchus	kaupii		Synaphobranchus_kaupii	1	unknown	Mass	7.6	0.0276			unknown		Bauchot R, Diagne M, Platel R, Ridet J-M, Bauchot M-L. in Fishbase. www.fishbase.org. date of access: Apr.-13-17
Anguilliformes	Anguilliformes	Synaphobranchidae	Synaphobranchus	kaupii		Synaphobranchus_kaupii	1	unknown	Mass	8	0.0273		21.2	unknown		Bauchot R, Diagne M, Platel R, Ridet J-M, Bauchot M-L. in Fishbase. www.fishbase.org. date of access: Apr.-13-17
Anguilliformes	Anguilliformes	Synaphobranchidae	Synaphobranchus	kaupii		Synaphobranchus_kaupii	1	unknown	Mass	14	0.102			unknown		Bauchot R, Diagne M, Platel R, Ridet J-M, Bauchot M-L. in Fishbase. www.fishbase.org. date of access: Apr.-13-17
Atheriniformes	Atheriniformes	Atherinidae	Atherina	presbyter		Atherina_presbyter	1	unknown	Mass	10.2	0.05	10.3	11.9	Adult		Bauchot R, Diagne M, Platel R, Ridet J-M, Bauchot M-L. in Fishbase. www.fishbase.org. date of access: Apr.-13-17	Life stage estimated from TL from criterion given by Moreno et al. 2005 Fish. Res. 72:121-131 m > 57mm f > 58 mm has visible gonads
Atheriniformes	Atheriniformes	Atherinidae	Atherina	presbyter		Atherina_presbyter	1	unknown	Mass	11.6	0.055	10.9	11.6	Adult		Bauchot R, Diagne M, Platel R, Ridet J-M, Bauchot M-L. in Fishbase. www.fishbase.org. date of access: Apr.-13-17	Life stage estimated from TL from criterion given by Moreno et al. 2005 Fish. Res. 72:121-131 m > 57mm f > 58 mm has visible gonads
Atheriniformes	Atheriniformes	Atherinidae	Atherina	presbyter		Atherina_presbyter	1	unknown	Mass	17.8	0.063	12.4	13.8	Adult		Bauchot R, Diagne M, Platel R, Ridet J-M, Bauchot M-L. in Fishbase. www.fishbase.org. date of access: Apr.-13-17	Life stage estimated from TL from criterion given by Moreno et al. 2005 Fish. Res. 72:121-131 m > 57mm f > 58 mm has visible gonads
Atheriniformes	Atheriniformes	Atherinidae	Atherina	presbyter		Atherina_presbyter	1	unknown	Mass	18.4	0.065	12.7	14.3	Adult		Bauchot R, Diagne M, Platel R, Ridet J-M, Bauchot M-L. in Fishbase. www.fishbase.org. date of access: Apr.-13-17	Life stage estimated from TL from criterion given by Moreno et al. 2005 Fish. Res. 72:121-131 m > 57mm f > 58 mm has visible gonads
Atheriniformes	Atheriniformes	Atherinidae	Atherina	presbyter		Atherina_presbyter	1	unknown	Mass	18.8	0.074	12.6		Adult		Bauchot R, Diagne M, Platel R, Ridet J-M, Bauchot M-L. in Fishbase. www.fishbase.org. date of access: Apr.-13-17	Life stage estimated from TL from criterion given by Moreno et al. 2005 Fish. Res. 72:121-131 m > 57mm f > 58 mm has visible gonads
Atheriniformes	Atheriniformes	Atherinidae	Atherina	presbyter		Atherina_presbyter	1	unknown	Mass	19.3	0.065	12.8	14.5	Adult		Bauchot R, Diagne M, Platel R, Ridet J-M, Bauchot M-L. in Fishbase. www.fishbase.org. date of access: Apr.-13-17	Life stage estimated from TL from criterion given by Moreno et al. 2005 Fish. Res. 72:121-131 m > 57mm f > 58 mm has visible gonads
Atheriniformes	Atheriniformes	Atherinidae	Atherina	presbyter		Atherina_presbyter	1	unknown	Mass	19.4	0.069	12.4	13.9	Adult		Bauchot R, Diagne M, Platel R, Ridet J-M, Bauchot M-L. in Fishbase. www.fishbase.org. date of access: Apr.-13-17	Life stage estimated from TL from criterion given by Moreno et al. 2005 Fish. Res. 72:121-131 m > 57mm f > 58 mm has visible gonads
Atheriniformes	Atheriniformes	Atherinidae	Atherina	presbyter		Atherina_presbyter	1	unknown	Mass	20.1	0.072	13	14.4	Adult		Bauchot R, Diagne M, Platel R, Ridet J-M, Bauchot M-L. in Fishbase. www.fishbase.org. date of access: Apr.-13-17	Life stage estimated from TL from criterion given by Moreno et al. 2005 Fish. Res. 72:121-131 m > 57mm f > 58 mm has visible gonads
Atheriniformes	Atheriniformes	Atherinidae	Atherina	presbyter		Atherina_presbyter	1	unknown	Mass	20.3	0.063	12.6	13.9	Adult		Bauchot R, Diagne M, Platel R, Ridet J-M, Bauchot M-L. in Fishbase. www.fishbase.org. date of access: Apr.-13-17	Life stage estimated from TL from criterion given by Moreno et al. 2005 Fish. Res. 72:121-131 m > 57mm f > 58 mm has visible gonads
Atheriniformes	Atheriniformes	Atherinidae	Atherina	presbyter		Atherina_presbyter	1	unknown	Mass	20.3	0.073	12.7	14.1	Adult		Bauchot R, Diagne M, Platel R, Ridet J-M, Bauchot M-L. in Fishbase. www.fishbase.org. date of access: Apr.-13-17	Life stage estimated from TL from criterion given by Moreno et al. 2005 Fish. Res. 72:121-131 m > 57mm f > 58 mm has visible gonads
Atheriniformes	Atheriniformes	Atherinidae	Atherina	presbyter		Atherina_presbyter	1	unknown	Mass	20.4	0.073	13	14.5	Adult		Bauchot R, Diagne M, Platel R, Ridet J-M, Bauchot M-L. in Fishbase. www.fishbase.org. date of access: Apr.-13-17	Life stage estimated from TL from criterion given by Moreno et al. 2005 Fish. Res. 72:121-131 m > 57mm f > 58 mm has visible gonads
Atheriniformes	Atheriniformes	Atherinidae	Atherina	presbyter		Atherina_presbyter	1	unknown	Mass	20.8	0.068	12.6	14	Adult		Bauchot R, Diagne M, Platel R, Ridet J-M, Bauchot M-L. in Fishbase. www.fishbase.org. date of access: Apr.-13-17	Life stage estimated from TL from criterion given by Moreno et al. 2005 Fish. Res. 72:121-131 m > 57mm f > 58 mm has visible gonads
Atheriniformes	Atheriniformes	Atherinidae	Atherina	presbyter		Atherina_presbyter	1	unknown	Mass	21.2	0.067	13.1	14.8	Adult		Bauchot R, Diagne M, Platel R, Ridet J-M, Bauchot M-L. in Fishbase. www.fishbase.org. date of access: Apr.-13-17	Life stage estimated from TL from criterion given by Moreno et al. 2005 Fish. Res. 72:121-131 m > 57mm f > 58 mm has visible gonads
Atheriniformes	Atheriniformes	Atherinidae	Atherina	presbyter		Atherina_presbyter	1	unknown	Mass	21.7	0.069	13	14.5	Adult		Bauchot R, Diagne M, Platel R, Ridet J-M, Bauchot M-L. in Fishbase. www.fishbase.org. date of access: Apr.-13-17	Life stage estimated from TL from criterion given by Moreno et al. 2005 Fish. Res. 72:121-131 m > 57mm f > 58 mm has visible gonads
Atheriniformes	Atheriniformes	Atherinidae	Atherina	presbyter		Atherina_presbyter	1	unknown	Mass	21.7	0.077	13.4	15	Adult		Bauchot R, Diagne M, Platel R, Ridet J-M, Bauchot M-L. in Fishbase. www.fishbase.org. date of access: Apr.-13-17	Life stage estimated from TL from criterion given by Moreno et al. 2005 Fish. Res. 72:121-131 m > 57mm f > 58 mm has visible gonads
Atheriniformes	Atheriniformes	Atherinidae	Atherina	presbyter		Atherina_presbyter	1	unknown	Mass	22	0.07	12.9	14.6	Adult		Bauchot R, Diagne M, Platel R, Ridet J-M, Bauchot M-L. in Fishbase. www.fishbase.org. date of access: Apr.-13-17	Life stage estimated from TL from criterion given by Moreno et al. 2005 Fish. Res. 72:121-131 m > 57mm f > 58 mm has visible gonads
Atheriniformes	Atheriniformes	Atherinidae	Atherina	presbyter		Atherina_presbyter	1	unknown	Mass	22.5	0.074	13.2		Adult		Bauchot R, Diagne M, Platel R, Ridet J-M, Bauchot M-L. in Fishbase. www.fishbase.org. date of access: Apr.-13-17	Life stage estimated from TL from criterion given by Moreno et al. 2005 Fish. Res. 72:121-131 m > 57mm f > 58 mm has visible gonads
Atheriniformes	Atheriniformes	Atherinidae	Atherina	presbyter		Atherina_presbyter	1	unknown	Mass	22.9	0.073	13.1	14.7	Adult		Bauchot R, Diagne M, Platel R, Ridet J-M, Bauchot M-L. in Fishbase. www.fishbase.org. date of access: Apr.-13-17	Life stage estimated from TL from criterion given by Moreno et al. 2005 Fish. Res. 72:121-131 m > 57mm f > 58 mm has visible gonads
Atheriniformes	Atheriniformes	Atherinidae	Atherina	presbyter		Atherina_presbyter	1	unknown	Mass	23.8	0.068	13.3	15.2	Adult		Bauchot R, Diagne M, Platel R, Ridet J-M, Bauchot M-L. in Fishbase. www.fishbase.org. date of access: Apr.-13-17	Life stage estimated from TL from criterion given by Moreno et al. 2005 Fish. Res. 72:121-131 m > 57mm f > 58 mm has visible gonads
Atheriniformes	Atheriniformes	Atherinidae	Atherina	presbyter		Atherina_presbyter	1	unknown	Mass	24	0.078	13.3	14.8	Adult		Bauchot R, Diagne M, Platel R, Ridet J-M, Bauchot M-L. in Fishbase. www.fishbase.org. date of access: Apr.-13-17	Life stage estimated from TL from criterion given by Moreno et al. 2005 Fish. Res. 72:121-131 m > 57mm f > 58 mm has visible gonads
Atheriniformes	Atheriniformes	Atherinidae	Atherina	presbyter		Atherina_presbyter	1	unknown	Mass	24.9	0.078	13.6	15.3	Adult		Bauchot R, Diagne M, Platel R, Ridet J-M, Bauchot M-L. in Fishbase. www.fishbase.org. date of access: Apr.-13-17	Life stage estimated from TL from criterion given by Moreno et al. 2005 Fish. Res. 72:121-131 m > 57mm f > 58 mm has visible gonads
Atheriniformes	Atheriniformes	Atherinidae	Atherina	presbyter		Atherina_presbyter	1	unknown	Mass	25	0.075	13.6	15	Adult		Bauchot R, Diagne M, Platel R, Ridet J-M, Bauchot M-L. in Fishbase. www.fishbase.org. date of access: Apr.-13-17	Life stage estimated from TL from criterion given by Moreno et al. 2005 Fish. Res. 72:121-131 m > 57mm f > 58 mm has visible gonads
Atheriniformes	Atheriniformes	Atherinidae	Atherina	presbyter		Atherina_presbyter	1	unknown	Mass	26.8	0.079	14.1	16	Adult		Bauchot R, Diagne M, Platel R, Ridet J-M, Bauchot M-L. in Fishbase. www.fishbase.org. date of access: Apr.-13-17
Atheriniformes	Atheriniformes	Atherinidae	Atherina	presbyter		Atherina_presbyter	1	unknown	Mass	27.1	0.09	14	15.7	Adult		Bauchot R, Diagne M, Platel R, Ridet J-M, Bauchot M-L. in Fishbase. www.fishbase.org. date of access: Apr.-13-17
Atheriniformes	Atheriniformes	Atherinidae	Atherina	presbyter		Atherina_presbyter	1	unknown	Mass	29.3	0.085	14.4	16	Adult		Bauchot R, Diagne M, Platel R, Ridet J-M, Bauchot M-L. in Fishbase. www.fishbase.org. date of access: Apr.-13-17
Atheriniformes	Atheriniformes	Atherinidae	Atherina	presbyter		Atherina_presbyter	1	unknown	Mass	29.5	0.087			Adult		Bauchot R, Diagne M, Platel R, Ridet J-M, Bauchot M-L. in Fishbase. www.fishbase.org. date of access: Apr.-13-17
Atheriniformes	Atheriniformes	Atherinidae	Atherina	presbyter		Atherina_presbyter	1	unknown	Mass	29.7	0.097			Adult		Bauchot R, Diagne M, Platel R, Ridet J-M, Bauchot M-L. in Fishbase. www.fishbase.org. date of access: Apr.-13-17
Atheriniformes	Atheriniformes	Atherinidae	Atherina	presbyter		Atherina_presbyter	1	unknown	Mass	30	0.091	13	15	Adult		Bauchot R, Diagne M, Platel R, Ridet J-M, Bauchot M-L. in Fishbase. www.fishbase.org. date of access: Apr.-13-17
Atheriniformes	Atheriniformes	Atherinidae	Atherina	presbyter		Atherina_presbyter	1	unknown	Mass	30.5	0.109	14.6	16.7	Adult		Bauchot R, Diagne M, Platel R, Ridet J-M, Bauchot M-L. in Fishbase. www.fishbase.org. date of access: Apr.-13-17
Atheriniformes	Atheriniformes	Atherinidae	Atherina	presbyter		Atherina_presbyter	1	unknown	Mass	31.4	0.103	14.5	16.3	Adult		Bauchot R, Diagne M, Platel R, Ridet J-M, Bauchot M-L. in Fishbase. www.fishbase.org. date of access: Apr.-13-17
Atheriniformes	Atheriniformes	Atherinidae	Atherinomorus	lacunosus		Atherinomorus_lacunosus	1	unknown	Mass	15.1	0.081	9.2	11.1	Adult		Bauchot R, Diagne M, Platel R, Ridet J-M, Bauchot M-L. in Fishbase. www.fishbase.org. date of access: Apr.-13-17
Atheriniformes	Atheriniformes	Atherinidae	Atherinomorus	lacunosus		Atherinomorus_lacunosus	1	unknown	Mass	28	0.123	11.8	14	Adult		Bauchot R, Diagne M, Platel R, Ridet J-M, Bauchot M-L. in Fishbase. www.fishbase.org. date of access: Apr.-13-17
Atheriniformes	Atheriniformes	Atherinidae	Hypoatherina	temminckii		Hypoatherina_temminckii	1	unknown	Mass	7.6	0.044			unknown		Bauchot R, Diagne M, Platel R, Ridet J-M, Bauchot M-L. in Fishbase. www.fishbase.org. date of access: Apr.-13-17
Atheriniformes	Atheriniformes	Atherinidae	Hypoatherina	temminckii		Hypoatherina_temminckii	1	unknown	Mass	10	0.079			unknown		Bauchot R, Diagne M, Platel R, Ridet J-M, Bauchot M-L. in Fishbase. www.fishbase.org. date of access: Apr.-13-17
Atheriniformes	Atheriniformes	Isonidae	Iso	natalensis		Iso_natalensis	1	unknown	Mass	1	0.0115			unknown		Bauchot R, Diagne M, Platel R, Ridet J-M, Bauchot M-L. in Fishbase. www.fishbase.org. date of access: Apr.-13-17
Aulopiformes	Aulopiformes	Aulopidae	Hime	japonica		Hime_japonica	1	unknown	Mass	72	0.16	16.5	19.5	unknown		Bauchot R, Diagne M, Platel R, Ridet J-M, Bauchot M-L. in Fishbase. www.fishbase.org. date of access: Apr.-13-17
Aulopiformes	Aulopiformes	Omosudidae	Omosudis	lowii		Omosudis_lowii	1	unknown	Mass	60	0.058			unknown		Bauchot R, Diagne M, Platel R, Ridet J-M, Bauchot M-L. in Fishbase. www.fishbase.org. date of access: Apr.-13-17
Aulopiformes	Aulopiformes	Synodontidae	Saurida	undosquamis		Saurida_undosquamis	1	unknown	Mass	48.7	0.071	16.5	19.5	unknown		Bauchot R, Diagne M, Platel R, Ridet J-M, Bauchot M-L. in Fishbase. www.fishbase.org. date of access: Apr.-13-17
Aulopiformes	Aulopiformes	Synodontidae	Synodus	saurus		Synodus_saurus	1	unknown	Mass	45	0.111	15.2	17.2	unknown		Bauchot R, Diagne M, Platel R, Ridet J-M, Bauchot M-L. in Fishbase. www.fishbase.org. date of access: Apr.-13-17
Aulopiformes	Aulopiformes	Synodontidae	Synodus	variegatus		Synodus_variegatus	1	unknown	Mass	17	0.065	10.8	12.3	unknown		Bauchot R, Diagne M, Platel R, Ridet J-M, Bauchot M-L. in Fishbase. www.fishbase.org. date of access: Apr.-13-17
Aulopiformes	Aulopiformes	Synodontidae	Synodus	variegatus		Synodus_variegatus	1	unknown	Mass	37	0.091	14.6	16.6	unknown		Bauchot R, Diagne M, Platel R, Ridet J-M, Bauchot M-L. in Fishbase. www.fishbase.org. date of access: Apr.-13-17
Aulopiformes	Aulopiformes	Synodontidae	Synodus	variegatus		Synodus_variegatus	1	unknown	Mass	166	0.238	26	28.5	unknown		Bauchot R, Diagne M, Platel R, Ridet J-M, Bauchot M-L. in Fishbase. www.fishbase.org. date of access: Apr.-13-17
Aulopiformes	Aulopiformes	Synodontidae	Synodus	variegatus		Synodus_variegatus	1	unknown	Mass	58.6	0.125			unknown		Iglesias TL et al. (2015) J. Evol. Biol. 28:1080-1090
Aulopiformes	Aulopiformes	Synodontidae	Trachinocephalus	myops		Trachinocephalus_myops	1	unknown	Mass	123.5	0.14	20	23	unknown		Bauchot R, Diagne M, Platel R, Ridet J-M, Bauchot M-L. in Fishbase. www.fishbase.org. date of access: Apr.-13-17
Aulopiformes	Aulopiformes	Synodontidae	Trachinocephalus	myops		Trachinocephalus_myops	1	unknown	Mass	62	0.09	16.2	18.5	unknown		Bauchot R, Diagne M, Platel R, Ridet J-M, Bauchot M-L. in Fishbase. www.fishbase.org. date of access: Apr.-13-17
Aulopiformes	Aulopiformes	Paralepididae	Arctozenus	risso		Arctozenus_risso	1	unknown	Mass	65	0.134			unknown		Bauchot R, Diagne M, Platel R, Ridet J-M, Bauchot M-L. in Fishbase. www.fishbase.org. date of access: Apr.-13-17
Aulopiformes	Aulopiformes	Paralepididae	Arctozenus	risso		Arctozenus_risso	1	unknown	Mass	93	0.109			unknown		Bauchot R, Diagne M, Platel R, Ridet J-M, Bauchot M-L. in Fishbase. www.fishbase.org. date of access: Apr.-13-17
Beloniformes	Beloniformes	Adrianichthyidae	Oryzias	celebensis		Oryzias_celebensis	3	unknown	Mass	0.45	0.015			unknown		Albert JS et al. (1999) Proceedings of the 5th Indo-Pacific Fish Conference (Seret B, Sire J-Y, eds), pp 647-656
Beloniformes	Beloniformes	Adrianichthyidae	Oryzias	celebensis		Oryzias_celebensis	1	unknown	Mass	0.34	0.011			unknown		Bauchot R, Diagne M, Platel R, Ridet J-M, Bauchot M-L. in Fishbase. www.fishbase.org. date of access: Apr.-13-17
Beloniformes	Beloniformes	Adrianichthyidae	Oryzias	celebensis		Oryzias_celebensis	1	unknown	Mass	0.41	0.013			unknown		Bauchot R, Diagne M, Platel R, Ridet J-M, Bauchot M-L. in Fishbase. www.fishbase.org. date of access: Apr.-13-17
Beloniformes	Beloniformes	Adrianichthyidae	Oryzias	celebensis		Oryzias_celebensis	1	unknown	Mass	0.45	0.011			unknown		Bauchot R, Diagne M, Platel R, Ridet J-M, Bauchot M-L. in Fishbase. www.fishbase.org. date of access: Apr.-13-17
Beloniformes	Beloniformes	Adrianichthyidae	Oryzias	dancena		Oryzias_dancena	3	unknown	Mass	0.24	0.014			unknown		Albert JS et al. (1999) Proceedings of the 5th Indo-Pacific Fish Conference (Seret B, Sire J-Y, eds), pp 647-656
Beloniformes	Beloniformes	Adrianichthyidae	Oryzias	latipes		Oryzias_latipes	5	unknown	Mass	0.32	0.012			unknown		Albert JS et al. (1999) Proceedings of the 5th Indo-Pacific Fish Conference (Seret B, Sire J-Y, eds), pp 647-656
Beloniformes	Beloniformes	Adrianichthyidae	Oryzias	latipes		Oryzias_latipes	1	unknown	Mass	0.26	0.012			unknown		Bauchot R, Diagne M, Platel R, Ridet J-M, Bauchot M-L. in Fishbase. www.fishbase.org. date of access: Apr.-13-17
Beloniformes	Beloniformes	Adrianichthyidae	Oryzias	latipes		Oryzias_latipes	1	unknown	Mass	0.31	0.013			unknown		Bauchot R, Diagne M, Platel R, Ridet J-M, Bauchot M-L. in Fishbase. www.fishbase.org. date of access: Apr.-13-17
Beloniformes	Beloniformes	Adrianichthyidae	Oryzias	latipes		Oryzias_latipes	1	unknown	Mass	0.32	0.012			unknown		Bauchot R, Diagne M, Platel R, Ridet J-M, Bauchot M-L. in Fishbase. www.fishbase.org. date of access: Apr.-13-17
Beloniformes	Beloniformes	Adrianichthyidae	Oryzias	marmoratus		Oryzias_marmoratus	5	unknown	Mass	0.64	0.017			unknown		Albert JS et al. (1999) Proceedings of the 5th Indo-Pacific Fish Conference (Seret B, Sire J-Y, eds), pp 647-656
Beloniformes	Beloniformes	Adrianichthyidae	Oryzias	matanensis		Oryzias_matanensis	5	unknown	Mass	0.61	0.016			unknown		Albert JS et al. (1999) Proceedings of the 5th Indo-Pacific Fish Conference (Seret B, Sire J-Y, eds), pp 647-656
Beloniformes	Beloniformes	Adrianichthyidae	Oryzias	matanensis		Oryzias_matanensis	1	unknown	Mass	0.43	0.014			unknown		Bauchot R, Diagne M, Platel R, Ridet J-M, Bauchot M-L. in Fishbase. www.fishbase.org. date of access: Apr.-13-17
Beloniformes	Beloniformes	Adrianichthyidae	Oryzias	matanensis		Oryzias_matanensis	1	unknown	Mass	0.5	0.0145			unknown		Bauchot R, Diagne M, Platel R, Ridet J-M, Bauchot M-L. in Fishbase. www.fishbase.org. date of access: Apr.-13-17
Beloniformes	Beloniformes	Adrianichthyidae	Oryzias	matanensis		Oryzias_matanensis	1	unknown	Mass	0.61	0.016			unknown		Bauchot R, Diagne M, Platel R, Ridet J-M, Bauchot M-L. in Fishbase. www.fishbase.org. date of access: Apr.-13-17
Beloniformes	Beloniformes	Adrianichthyidae	Oryzias	profundicola		Oryzias_profundicola	5	unknown	Mass	0.59	0.016			unknown		Albert JS et al. (1999) Proceedings of the 5th Indo-Pacific Fish Conference (Seret B, Sire J-Y, eds), pp 647-656
Beloniformes	Beloniformes	Belonidae	Ablennes	hians		Ablennes_hians	1	unknown	Mass	1500	1.018			unknown		Bauchot R, Diagne M, Platel R, Ridet J-M, Bauchot M-L. in Fishbase. www.fishbase.org. date of access: Apr.-13-17
Beloniformes	Beloniformes	Belonidae	Belone	belone		Belone_belone	1	unknown	Mass	78	0.237	40.2	42.3	Adult		Bauchot R, Diagne M, Platel R, Ridet J-M, Bauchot M-L. in Fishbase. www.fishbase.org. date of access: Apr.-13-17
Beloniformes	Beloniformes	Belonidae	Belone	belone		Belone_belone	1	unknown	Mass	282	0.421	54.3	58.1	Adult		Bauchot R, Diagne M, Platel R, Ridet J-M, Bauchot M-L. in Fishbase. www.fishbase.org. date of access: Apr.-13-17
Beloniformes	Beloniformes	Belonidae	Belone	belone		Belone_belone	1	unknown	Mass	329.9	0.553	61.8	66.4	Adult		Bauchot R, Diagne M, Platel R, Ridet J-M, Bauchot M-L. in Fishbase. www.fishbase.org. date of access: Apr.-13-17
Beloniformes	Beloniformes	Belonidae	Belone	belone		Belone_belone	1	unknown	Mass	401	0.409	62	65.5	Adult		Bauchot R, Diagne M, Platel R, Ridet J-M, Bauchot M-L. in Fishbase. www.fishbase.org. date of access: Apr.-13-17
Beloniformes	Beloniformes	Belonidae	Belone	belone		Belone_belone	1	unknown	Mass	345.4	0.453			Adult		Bauchot R, Diagne M, Platel R, Ridet J-M, Bauchot M-L. in Fishbase. www.fishbase.org. date of access: Apr.-13-17
Beloniformes	Beloniformes	Belonidae	Platybelone	argalus		Platybelone_argalus	1	unknown	Mass	101	0.402	40.5	42.2	unknown		Bauchot R, Diagne M, Platel R, Ridet J-M, Bauchot M-L. in Fishbase. www.fishbase.org. date of access: Apr.-13-17
Beloniformes	Beloniformes	Belonidae	Strongylura	strongylura		Strongylura_strongylura	1	unknown	Mass	74	0.16	34	37	unknown		Bauchot R, Diagne M, Platel R, Ridet J-M, Bauchot M-L. in Fishbase. www.fishbase.org. date of access: Apr.-13-17
Beloniformes	Beloniformes	Belonidae	Tylosurus	crocodilus		Tylosurus_crocodilus	1	unknown	Mass	2500	0.884	81	92	unknown		Bauchot R, Diagne M, Platel R, Ridet J-M, Bauchot M-L. in Fishbase. www.fishbase.org. date of access: Apr.-13-17
Beloniformes	Beloniformes	Hemiramphidae	Hemiramphus	far		Hemiramphus_far	1	unknown	Mass	37	0.182	22.5	25.2	unknown		Bauchot R, Diagne M, Platel R, Ridet J-M, Bauchot M-L. in Fishbase. www.fishbase.org. date of access: Apr.-13-17
Beloniformes	Beloniformes	Hemiramphidae	Nomorhamphus	megarrhamphus		Nomorhamphus_megarrhamphus	1	unknown	Mass	0.61	0.019			unknown		Albert JS et al. (1999) Proceedings of the 5th Indo-Pacific Fish Conference (Seret B, Sire J-Y, eds), pp 647-656
Beloniformes	Beloniformes	Hemiramphidae	Nomorhamphus	towoetii		Nomorhamphus_towoetii	1	unknown	Mass	0.59	0.018			unknown		Albert JS et al. (1999) Proceedings of the 5th Indo-Pacific Fish Conference (Seret B, Sire J-Y, eds), pp 647-656
Trachichthyiformes	Beryciformes	Anoplogastridae	Anoplogaster	cornuta		Anoplogaster_cornuta	1	unknown	Mass	114	0.0895			unknown		Bauchot R, Diagne M, Platel R, Ridet J-M, Bauchot M-L. in Fishbase. www.fishbase.org. date of access: Apr.-13-17
Trachichthyiformes	Beryciformes	Anoplogastridae	Anoplogaster	cornuta		Anoplogaster_cornuta	1	unknown	Mass	115	0.07	16.1	18.6	unknown		Bauchot R, Diagne M, Platel R, Ridet J-M, Bauchot M-L. in Fishbase. www.fishbase.org. date of access: Apr.-13-17
Beryciformes	Beryciformes	Berycidae	Beryx	decadactylus		Beryx_decadactylus	1	unknown	Mass	830	0.946			Adult		Bauchot R, Diagne M, Platel R, Ridet J-M, Bauchot M-L. in Fishbase. www.fishbase.org. date of access: Apr.-13-17
Beryciformes	Beryciformes	Berycidae	Beryx	decadactylus		Beryx_decadactylus	1	unknown	Mass	1000	0.974			Adult		Bauchot R, Diagne M, Platel R, Ridet J-M, Bauchot M-L. in Fishbase. www.fishbase.org. date of access: Apr.-13-17
Beryciformes	Beryciformes	Berycidae	Beryx	decadactylus		Beryx_decadactylus	1	unknown	Mass	245	0.497	21.5	26	unknown		Bauchot R, Diagne M, Platel R, Ridet J-M, Bauchot M-L. in Fishbase. www.fishbase.org. date of access: Apr.-13-17
Beryciformes	Beryciformes	Berycidae	Beryx	splendens		Beryx_splendens	1	unknown	Mass	315	0.836			Adult		Bauchot R, Diagne M, Platel R, Ridet J-M, Bauchot M-L. in Fishbase. www.fishbase.org. date of access: Apr.-13-17
Beryciformes	Beryciformes	Berycidae	Beryx	splendens		Beryx_splendens	1	unknown	Mass	200	0.619	19	24	unknown		Bauchot R, Diagne M, Platel R, Ridet J-M, Bauchot M-L. in Fishbase. www.fishbase.org. date of access: Apr.-13-17
Beryciformes	Beryciformes	Berycidae	Centroberyx	gerrardi		Centroberyx_gerrardi	1	unknown	Mass	663.05	0.819			unknown		Bauchot R, Diagne M, Platel R, Ridet J-M, Bauchot M-L. in Fishbase. www.fishbase.org. date of access: Apr.-13-17
Holocentriformes	Beryciformes	Holocentridae	Myripristis	berndti		Myripristis_berndti	2	unknown	Mass	24.9	0.209			unknown		Iglesias TL et al. (2015) J. Evol. Biol. 28:1080-1090
Holocentriformes	Beryciformes	Holocentridae	Myripristis	jacobus		Myripristis_jacobus	1	unknown	Mass	119	0.384			unknown		Iglesias TL et al. (2015) J. Evol. Biol. 28:1080-1090
Holocentriformes	Beryciformes	Holocentridae	Myripristis	kuntee		Myripristis_kuntee	1	unknown	Mass	20	0.177			unknown		Bauchot R, Diagne M, Platel R, Ridet J-M, Bauchot M-L. in Fishbase. www.fishbase.org. date of access: Apr.-13-17
Holocentriformes	Beryciformes	Holocentridae	Myripristis	kuntee		Myripristis_kuntee	1	unknown	Mass	42	0.28	10.5	13.2	unknown		Bauchot R, Diagne M, Platel R, Ridet J-M, Bauchot M-L. in Fishbase. www.fishbase.org. date of access: Apr.-13-17
Holocentriformes	Beryciformes	Holocentridae	Myripristis	kuntee		Myripristis_kuntee	1	unknown	Mass	27.27	0.22			unknown		Iglesias TL et al. (2015) J. Evol. Biol. 28:1080-1090
Holocentriformes	Beryciformes	Holocentridae	Myripristis	murdjan		Myripristis_murdjan	1	unknown	Mass	301.5	0.6105			unknown		Bauchot R, Diagne M, Platel R, Ridet J-M, Bauchot M-L. in Fishbase. www.fishbase.org. date of access: Apr.-13-17
Holocentriformes	Beryciformes	Holocentridae	Myripristis	violacea		Myripristis_violacea	1	unknown	Mass	48	0.27	11	13.7	unknown		Bauchot R, Diagne M, Platel R, Ridet J-M, Bauchot M-L. in Fishbase. www.fishbase.org. date of access: Apr.-13-17
Holocentriformes	Beryciformes	Holocentridae	Myripristis	violacea		Myripristis_violacea	1	unknown	Mass	190	0.426	16	20.5	unknown		Bauchot R, Diagne M, Platel R, Ridet J-M, Bauchot M-L. in Fishbase. www.fishbase.org. date of access: Apr.-13-17
Holocentriformes	Beryciformes	Holocentridae	Myripristis	violacea		Myripristis_violacea	3	unknown	Mass	88	0.341			unknown		Iglesias TL et al. (2015) J. Evol. Biol. 28:1080-1090
Holocentriformes	Beryciformes	Holocentridae	Neoniphon	argenteus		Neoniphon_argenteus	1	unknown	Mass	37	0.269	11.5	14	unknown		Bauchot R, Diagne M, Platel R, Ridet J-M, Bauchot M-L. in Fishbase. www.fishbase.org. date of access: Apr.-13-17
Holocentriformes	Beryciformes	Holocentridae	Neoniphon	aurolineatus		Neoniphon_aurolineatus	1	unknown	Mass	188	0.581	19.5	22.5	unknown		Bauchot R, Diagne M, Platel R, Ridet J-M, Bauchot M-L. in Fishbase. www.fishbase.org. date of access: Apr.-13-17
Holocentriformes	Beryciformes	Holocentridae	Neoniphon	aurolineatus		Neoniphon_aurolineatus	1	unknown	Mass	193	0.623	20	22.5	unknown		Bauchot R, Diagne M, Platel R, Ridet J-M, Bauchot M-L. in Fishbase. www.fishbase.org. date of access: Apr.-13-17
Holocentriformes	Beryciformes	Holocentridae	Neoniphon	sammara		Neoniphon_sammara	1	unknown	Mass	53	0.366	13.2	15.7	unknown		Bauchot R, Diagne M, Platel R, Ridet J-M, Bauchot M-L. in Fishbase. www.fishbase.org. date of access: Apr.-13-17
Holocentriformes	Beryciformes	Holocentridae	Neoniphon	sammara		Neoniphon_sammara	1	unknown	Mass	123	0.528	18.5	21.8	unknown		Bauchot R, Diagne M, Platel R, Ridet J-M, Bauchot M-L. in Fishbase. www.fishbase.org. date of access: Apr.-13-17
Holocentriformes	Beryciformes	Holocentridae	Neoniphon	sammara		Neoniphon_sammara	4	unknown	Mass	86.4	0.441			unknown		Iglesias TL et al. (2015) J. Evol. Biol. 28:1080-1090
Holocentriformes	Beryciformes	Holocentridae	Sargocentron	caudimaculatum		Sargocentron_caudimaculatum	1	unknown	Mass	210	0.548			unknown		Bauchot R, Diagne M, Platel R, Ridet J-M, Bauchot M-L. in Fishbase. www.fishbase.org. date of access: Apr.-13-17
Holocentriformes	Beryciformes	Holocentridae	Sargocentron	diadema		Sargocentron_diadema	1	unknown	Mass	29.2	0.215	11	12.8	unknown		Bauchot R, Diagne M, Platel R, Ridet J-M, Bauchot M-L. in Fishbase. www.fishbase.org. date of access: Apr.-13-17
Holocentriformes	Beryciformes	Holocentridae	Sargocentron	diadema		Sargocentron_diadema	1	unknown	Mass	75	0.326	13.4		unknown		Bauchot R, Diagne M, Platel R, Ridet J-M, Bauchot M-L. in Fishbase. www.fishbase.org. date of access: Apr.-13-17
Holocentriformes	Beryciformes	Holocentridae	Sargocentron	diadema		Sargocentron_diadema	3	unknown	Mass	25.13	0.187			unknown		Iglesias TL et al. (2015) J. Evol. Biol. 28:1080-1090
Holocentriformes	Beryciformes	Holocentridae	Sargocentron	microstoma		Sargocentron_microstoma	1	unknown	Mass	64.5	0.37	13.7	16.5	unknown		Bauchot R, Diagne M, Platel R, Ridet J-M, Bauchot M-L. in Fishbase. www.fishbase.org. date of access: Apr.-13-17
Holocentriformes	Beryciformes	Holocentridae	Sargocentron	microstoma		Sargocentron_microstoma	1	unknown	Mass	40.65	0.275			unknown		Iglesias TL et al. (2015) J. Evol. Biol. 28:1080-1090
Holocentriformes	Beryciformes	Holocentridae	Sargocentron	punctatissimum		Sargocentron_punctatissimum	1	unknown	Mass	70	0.263			unknown		Bauchot R, Diagne M, Platel R, Ridet J-M, Bauchot M-L. in Fishbase. www.fishbase.org. date of access: Apr.-13-17
Holocentriformes	Beryciformes	Holocentridae	Sargocentron	punctatissimum		Sargocentron_punctatissimum	1	unknown	Mass	70	0.333			unknown		Bauchot R, Diagne M, Platel R, Ridet J-M, Bauchot M-L. in Fishbase. www.fishbase.org. date of access: Apr.-13-17
Holocentriformes	Beryciformes	Holocentridae	Sargocentron	punctatissimum		Sargocentron_punctatissimum	1	unknown	Mass	75	0.363			unknown		Bauchot R, Diagne M, Platel R, Ridet J-M, Bauchot M-L. in Fishbase. www.fishbase.org. date of access: Apr.-13-17
Holocentriformes	Beryciformes	Holocentridae	Sargocentron	punctatissimum		Sargocentron_punctatissimum	1	unknown	Mass	37.06	0.24			unknown		Iglesias TL et al. (2015) J. Evol. Biol. 28:1080-1090
Holocentriformes	Beryciformes	Holocentridae	Sargocentron	spiniferum		Sargocentron_spiniferum	1	unknown	Mass	45	0.333			unknown		Bauchot R, Diagne M, Platel R, Ridet J-M, Bauchot M-L. in Fishbase. www.fishbase.org. date of access: Apr.-13-17
Holocentriformes	Beryciformes	Holocentridae	Sargocentron	spiniferum		Sargocentron_spiniferum	1	unknown	Mass	260	0.6			unknown		Bauchot R, Diagne M, Platel R, Ridet J-M, Bauchot M-L. in Fishbase. www.fishbase.org. date of access: Apr.-13-17
Holocentriformes	Beryciformes	Holocentridae	Sargocentron	spiniferum		Sargocentron_spiniferum	1	unknown	Mass	596	0.672			unknown		Bauchot R, Diagne M, Platel R, Ridet J-M, Bauchot M-L. in Fishbase. www.fishbase.org. date of access: Apr.-13-17
Holocentriformes	Beryciformes	Holocentridae	Sargocentron	spiniferum		Sargocentron_spiniferum	1	unknown	Mass	620	0.847			unknown		Bauchot R, Diagne M, Platel R, Ridet J-M, Bauchot M-L. in Fishbase. www.fishbase.org. date of access: Apr.-13-17
Holocentriformes	Beryciformes	Holocentridae	Sargocentron	spiniferum		Sargocentron_spiniferum	1	unknown	Mass	1140	0.921			unknown		Bauchot R, Diagne M, Platel R, Ridet J-M, Bauchot M-L. in Fishbase. www.fishbase.org. date of access: Apr.-13-17
Holocentriformes	Beryciformes	Holocentridae	Sargocentron	spiniferum		Sargocentron_spiniferum	1	unknown	Mass	383.5	0.546			unknown		Iglesias TL et al. (2015) J. Evol. Biol. 28:1080-1090
Holocentriformes	Beryciformes	Holocentridae	Sargocentron	tiere		Sargocentron_tiere	1	unknown	Mass	195	0.529	21	26	unknown		Bauchot R, Diagne M, Platel R, Ridet J-M, Bauchot M-L. in Fishbase. www.fishbase.org. date of access: Apr.-13-17
Holocentriformes	Beryciformes	Holocentridae	Sargocentron	tiere		Sargocentron_tiere	1	unknown	Mass	215	0.535	20.2	24.5	unknown		Bauchot R, Diagne M, Platel R, Ridet J-M, Bauchot M-L. in Fishbase. www.fishbase.org. date of access: Apr.-13-17
Holocentriformes	Beryciformes	Holocentridae	Sargocentron	tiere		Sargocentron_tiere	1	unknown	Mass	164.8	0.497			unknown		Iglesias TL et al. (2015) J. Evol. Biol. 28:1080-1090
Holocentriformes	Beryciformes	Holocentridae	Sargocentron	xantherythrum		Sargocentron_xantherythrum	1	unknown	Mass	34.1	0.252			unknown		Bauchot R, Diagne M, Platel R, Ridet J-M, Bauchot M-L. in Fishbase. www.fishbase.org. date of access: Apr.-13-17
Trachichthyiformes	Beryciformes	Trachichthyidae	Hoplostethus	mediterraneus		Hoplostethus_mediterraneus	1	unknown	Mass	348	0.349		28.03	Adult		Bauchot R, Diagne M, Platel R, Ridet J-M, Bauchot M-L. in Fishbase. www.fishbase.org. date of access: Apr.-13-17
Trachichthyiformes	Beryciformes	Trachichthyidae	Hoplostethus	mediterraneus		Hoplostethus_mediterraneus	1	unknown	Mass	360	0.383		28.34	Adult		Bauchot R, Diagne M, Platel R, Ridet J-M, Bauchot M-L. in Fishbase. www.fishbase.org. date of access: Apr.-13-17
Trachichthyiformes	Beryciformes	Trachichthyidae	Hoplostethus	mediterraneus		Hoplostethus_mediterraneus	1	unknown	Mass	400	0.392		29.33	Adult		Bauchot R, Diagne M, Platel R, Ridet J-M, Bauchot M-L. in Fishbase. www.fishbase.org. date of access: Apr.-13-17
Trachichthyiformes	Beryciformes	Trachichthyidae	Hoplostethus	mediterraneus		Hoplostethus_mediterraneus	1	unknown	Mass	420	0.387		29.79	Adult		Bauchot R, Diagne M, Platel R, Ridet J-M, Bauchot M-L. in Fishbase. www.fishbase.org. date of access: Apr.-13-17
Trachichthyiformes	Beryciformes	Trachichthyidae	Hoplostethus	mediterraneus		Hoplostethus_mediterraneus	1	unknown	Mass	525	0.401		32.03	Adult		Bauchot R, Diagne M, Platel R, Ridet J-M, Bauchot M-L. in Fishbase. www.fishbase.org. date of access: Apr.-13-17
Trachichthyiformes	Beryciformes	Trachichthyidae	Hoplostethus	mediterraneus		Hoplostethus_mediterraneus	1	unknown	Mass	3100	0.557		56.89	Adult		Bauchot R, Diagne M, Platel R, Ridet J-M, Bauchot M-L. in Fishbase. www.fishbase.org. date of access: Apr.-13-17
Trachichthyiformes	Beryciformes	Trachichthyidae	Hoplostethus	mediterraneus		Hoplostethus_mediterraneus	1	unknown	Mass	3600	0.626		59.72	Adult		Bauchot R, Diagne M, Platel R, Ridet J-M, Bauchot M-L. in Fishbase. www.fishbase.org. date of access: Apr.-13-17
Characiformes	Characiformes	Alestidae	Phenocogrammus	interruptus		Phenacogrammus_interruptus	1		Volume Conversion	1.51	0.0269					This study
Characiformes	Characiformes	Alestidae	Phenocogrammus	interruptus		Phenacogrammus_interruptus	1		Volume Conversion	1.08	0.0195					This study
Characiformes	Characiformes	Alestidae	Phenocogrammus	interruptus		Phenacogrammus_interruptus	1		Volume Conversion	1.42	0.0148					This study
Characiformes	Characiformes	Alestidae	Phenocogrammus	interruptus		Phenacogrammus_interruptus	1		Volume Conversion	1.32	0.0148					This study
Characiformes	Characiformes	Characidae	Gymnocorymbus	ternetzi		Gymnocorymbus_ternetzi	1		Volume Conversion	1.6	0.0149					This study
Characiformes	Characiformes	Characidae	Gymnocorymbus	ternetzi		Gymnocorymbus_ternetzi	1		Volume Conversion	1.51	0.0163					This study
Characiformes	Characiformes	Characidae	Gymnocorymbus	ternetzi		Gymnocorymbus_ternetzi	1		Volume Conversion	1.48	0.0205					This study
Characiformes	Characiformes	Parodontidae	Parodon	nasus		Parodon_nasus	1	unknown	Mass	3.07	0.043			unknown	Parodon gestri	Albert JS et al. (1999) Proceedings of the 5th Indo-Pacific Fish Conference (Seret B, Sire J-Y, eds), pp 647-656
Characiformes	Characiformes	Serrasalmidae	Pygocentrus	nattereri		Pygocentrus_nattereri	1	unknown	Mass	8.48	0.058			unknown		Albert JS et al. (1999) Proceedings of the 5th Indo-Pacific Fish Conference (Seret B, Sire J-Y, eds), pp 647-656
Clupeiformes	Clupeiformes	Clupeidae	Alosa	alosa		Alosa_alosa	1	unknown	Mass	400	0.354			unknown		Bauchot R, Diagne M, Platel R, Ridet J-M, Bauchot M-L. in Fishbase. www.fishbase.org. date of access: Apr.-13-17
Clupeiformes	Clupeiformes	Clupeidae	Alosa	alosa		Alosa_alosa	1	unknown	Mass	1050	0.506			unknown		Bauchot R, Diagne M, Platel R, Ridet J-M, Bauchot M-L. in Fishbase. www.fishbase.org. date of access: Apr.-13-17
Clupeiformes	Clupeiformes	Clupeidae	Alosa	caspia	caspia	Alosa_caspia	1	unknown	Mass	84	0.234			unknown		Bauchot R, Diagne M, Platel R, Ridet J-M, Bauchot M-L. in Fishbase. www.fishbase.org. date of access: Apr.-13-17
Clupeiformes	Clupeiformes	Clupeidae	Alosa	fallax		Alosa_fallax	1	unknown	Mass	600	0.452			unknown		Bauchot R, Diagne M, Platel R, Ridet J-M, Bauchot M-L. in Fishbase. www.fishbase.org. date of access: Apr.-13-17
Clupeiformes	Clupeiformes	Clupeidae	Alosa	immaculata		Alosa_immaculata	1	unknown	Mass	280	0.33			unknown		Bauchot R, Diagne M, Platel R, Ridet J-M, Bauchot M-L. in Fishbase. www.fishbase.org. date of access: Apr.-13-17
Clupeiformes	Clupeiformes	Clupeidae	Alosa	immaculata		Alosa_immaculata	1	unknown	Mass	350	0.438			unknown		Bauchot R, Diagne M, Platel R, Ridet J-M, Bauchot M-L. in Fishbase. www.fishbase.org. date of access: Apr.-13-17
Clupeiformes	Clupeiformes	Clupeidae	Alosa	immaculata		Alosa_immaculata	1	unknown	Mass	375	0.494			unknown		Bauchot R, Diagne M, Platel R, Ridet J-M, Bauchot M-L. in Fishbase. www.fishbase.org. date of access: Apr.-13-17
Clupeiformes	Clupeiformes	Clupeidae	Amblygaster	sirm		Amblygaster_sirm	1	unknown	Mass	25	0.115			unknown		Bauchot R, Diagne M, Platel R, Ridet J-M, Bauchot M-L. in Fishbase. www.fishbase.org. date of access: Apr.-13-17
Clupeiformes	Clupeiformes	Clupeidae	Anodontostoma	chacunda		Anodontostoma_chacunda	1	unknown	Mass	43	0.155			unknown		Bauchot R, Diagne M, Platel R, Ridet J-M, Bauchot M-L. in Fishbase. www.fishbase.org. date of access: Apr.-13-17
Clupeiformes	Clupeiformes	Clupeidae	Clupea	harengus		Clupea_harengus	1	unknown	Mass	180	0.281	23.5	27.5	Adult		Bauchot R, Diagne M, Platel R, Ridet J-M, Bauchot M-L. in Fishbase. www.fishbase.org. date of access: Apr.-13-17
Clupeiformes	Clupeiformes	Clupeidae	Clupea	harengus		Clupea_harengus	1	unknown	Mass	180	0.428			Adult		Bauchot R, Diagne M, Platel R, Ridet J-M, Bauchot M-L. in Fishbase. www.fishbase.org. date of access: Apr.-13-17
Clupeiformes	Clupeiformes	Clupeidae	Clupea	harengus		Clupea_harengus	1	unknown	Mass	205	0.347	24	28	Adult		Bauchot R, Diagne M, Platel R, Ridet J-M, Bauchot M-L. in Fishbase. www.fishbase.org. date of access: Apr.-13-17
Clupeiformes	Clupeiformes	Clupeidae	Clupea	harengus		Clupea_harengus	1	unknown	Mass	480	0.48	27	32	Adult		Bauchot R, Diagne M, Platel R, Ridet J-M, Bauchot M-L. in Fishbase. www.fishbase.org. date of access: Apr.-13-17
Clupeiformes	Clupeiformes	Clupeidae	Clupea	harengus		Clupea_harengus	1	unknown	Mass	49	0.144			unknown		Bauchot R, Diagne M, Platel R, Ridet J-M, Bauchot M-L. in Fishbase. www.fishbase.org. date of access: Apr.-13-17
Clupeiformes	Clupeiformes	Clupeidae	Clupea	harengus		Clupea_harengus	1	unknown	Mass	85	0.234			unknown		Bauchot R, Diagne M, Platel R, Ridet J-M, Bauchot M-L. in Fishbase. www.fishbase.org. date of access: Apr.-13-17
Clupeiformes	Clupeiformes	Clupeidae	Hyperlophus	translucidus		Hyperlophus_translucidus	1	unknown	Mass	1.7	0.016			unknown		Bauchot R, Diagne M, Platel R, Ridet J-M, Bauchot M-L. in Fishbase. www.fishbase.org. date of access: Apr.-13-17
Clupeiformes	Clupeiformes	Clupeidae	Sardina	pilchardus		Sardina_pilchardus	1	unknown	Mass	160	0.354	22	26	unknown		Bauchot R, Diagne M, Platel R, Ridet J-M, Bauchot M-L. in Fishbase. www.fishbase.org. date of access: Apr.-13-17
Clupeiformes	Clupeiformes	Clupeidae	Sardinops	sagax		Sardinops_sagax	1	unknown	Mass	52.31	0.195			unknown		Bauchot R, Diagne M, Platel R, Ridet J-M, Bauchot M-L. in Fishbase. www.fishbase.org. date of access: Apr.-13-17
Clupeiformes	Clupeiformes	Clupeidae	Spratelloides	delicatulus		Spratelloides_delicatulus	1	unknown	Mass	1.1	0.011	4.8	5.2	unknown		Bauchot R, Diagne M, Platel R, Ridet J-M, Bauchot M-L. in Fishbase. www.fishbase.org. date of access: Apr.-13-17
Clupeiformes	Clupeiformes	Clupeidae	Spratelloides	delicatulus		Spratelloides_delicatulus	1	unknown	Mass	1.3	0.013	4.8	5.5	unknown		Bauchot R, Diagne M, Platel R, Ridet J-M, Bauchot M-L. in Fishbase. www.fishbase.org. date of access: Apr.-13-17
Clupeiformes	Clupeiformes	Clupeidae	Spratelloides	delicatulus		Spratelloides_delicatulus	1	unknown	Mass	2.1	0.016	5.5	6.2	unknown		Bauchot R, Diagne M, Platel R, Ridet J-M, Bauchot M-L. in Fishbase. www.fishbase.org. date of access: Apr.-13-17
Clupeiformes	Clupeiformes	Clupeidae	Sprattus	sprattus		Sprattus_sprattus	1	unknown	Mass	11	0.066	10.1		unknown		Bauchot R, Diagne M, Platel R, Ridet J-M, Bauchot M-L. in Fishbase. www.fishbase.org. date of access: Apr.-13-17
Clupeiformes	Clupeiformes	Clupeidae	Sprattus	sprattus		Sprattus_sprattus	1	unknown	Mass	20	0.13	15	16.5	unknown		Bauchot R, Diagne M, Platel R, Ridet J-M, Bauchot M-L. in Fishbase. www.fishbase.org. date of access: Apr.-13-17
Cypriniformes	Cypriniformes	Cyprinidae	Carassius	auratus		Carassius_auratus	1	f	Mass	9.52	0.097			unknown		Crile G and Quiring DP (1940) Ohio J Sci 40:219-259.
Cypriniformes	Cypriniformes	Cyprinidae	Carassius	auratus		Carassius_auratus	1	m	Mass	5.54	0.069			unknown		Crile G and Quiring DP (1940) Ohio J Sci 40:219-259.
Cypriniformes	Cypriniformes	Cyprinidae	Carassius	carassius		Carassius_carassius	1	unknown	Mass	5.22	0.47			unknown	Carassius vulgaris	Dubois E (1913) On the relation between the quantity of brain and the size of the body in vertebrates
Cypriniformes	Cypriniformes	Cyprinidae	Cyprinus	carpio		Cyprinus_carpio	2	f	Mass	1061	1.191			unknown		Crile G and Quiring DP (1940) Ohio J Sci 40:219-259.
Cypriniformes	Cypriniformes	Cyprinidae	Cyprinus	carpio		Cyprinus_carpio	4	m	Mass	1042.1	1.2833			unknown		Crile G and Quiring DP (1940) Ohio J Sci 40:219-259.
Cypriniformes	Cypriniformes	Cyprinidae	Cyprinus	carpio		Cyprinus_carpio	1	unknown	Mass	1817.3	1.27			unknown		Dubois E (1913) On the relation between the quantity of brain and the size of the body in vertebrates
Cypriniformes	Cypriniformes	Cyprinidae	Danio	rerio		Danio_rerio	1		Volume Conversion	0.29	0.0071					This study
Cypriniformes	Cypriniformes	Cyprinidae	Danio	rerio		Danio_rerio	1		Volume Conversion	0.34	0.0066					This study
Cypriniformes	Cypriniformes	Cyprinidae	Danio	rerio		Danio_rerio	1		Volume Conversion	0.3	0.0065					This study
Cypriniformes	Cypriniformes	Cyprinidae	Danio	rerio		Danio_rerio	1		Volume Conversion	0.28	0.0056					This study
Cypriniformes	Cypriniformes	Cyprinidae	Danio	rerio		Danio_rerio	1		Volume Conversion	0.19	0.0038					This study
Cypriniformes	Cypriniformes	Cyprinidae	Danio	rerio		Danio_rerio	1		Volume Conversion	0.4	0.006					This study
Cypriniformes	Cypriniformes	Cyprinidae	Danio	rerio		Danio_rerio	1		Volume Conversion	0.38	0.0052					This study
Cypriniformes	Cypriniformes	Cyprinidae	Danio	rerio		Danio_rerio	1		Volume Conversion	0.22	0.0043					This study
Cypriniformes	Cypriniformes	Cyprinidae	Danio	rerio		Danio_rerio	1		Volume Conversion	0.24	0.0039					This study
Cypriniformes	Cypriniformes	Cyprinidae	Danio	rerio		Danio_rerio	1		Volume Conversion	0.35	0.0064					This study
Cypriniformes	Cypriniformes	Cyprinidae	Danio	rerio		Danio_rerio	1		Volume Conversion	0.38	0.0067					This study
Cypriniformes	Cypriniformes	Cyprinidae	Danio	rerio		Danio_rerio	1		Volume Conversion	0.35	0.0046					This study
Cypriniformes	Cypriniformes	Cyprinidae	Devario	aequipinnatus		Devario_aequipinnatus	1		Volume Conversion	2.01	0.0237					This study
Cypriniformes	Cypriniformes	Cyprinidae	Devario	aequipinnatus		Devario_aequipinnatus	1		Volume Conversion	1.97	0.018					This study
Cypriniformes	Cypriniformes	Cyprinidae	Devario	aequipinnatus		Devario_aequipinnatus	1		Volume Conversion	1.77	0.016					This study
Cypriniformes	Cypriniformes	Cyprinidae	Devario	aequipinnatus		Devario_aequipinnatus	1		Volume Conversion	1.64	0.0184					This study
Cypriniformes	Cypriniformes	Cyprinidae	Gobio	gobio		Gobio_gobio	2	unknown	Mass	42.2	0.159			unknown	Gobio fluviatilis	Dubois E (1913) On the relation between the quantity of brain and the size of the body in vertebrates
Cyprinodontiformes	Cyprinodontiformes	Aplocheilidae	Aplocheilus	panchax		Aplocheilus_panchax	1	unknown	Mass	0.24	0.014			unknown		Bauchot R, Diagne M, Platel R, Ridet J-M, Bauchot M-L. in Fishbase. www.fishbase.org. date of access: Apr.-13-17
Cyprinodontiformes	Cyprinodontiformes	Aplocheilidae	Aplocheilus	panchax		Aplocheilus_panchax	1	unknown	Mass	0.24	0.013			unknown		Bauchot R, Diagne M, Platel R, Ridet J-M, Bauchot M-L. in Fishbase. www.fishbase.org. date of access: Apr.-13-17
Cyprinodontiformes	Cyprinodontiformes	Aplocheilidae	Aplocheilus	panchax		Aplocheilus_panchax	1	unknown	Mass	0.26	0.013			unknown		Bauchot R, Diagne M, Platel R, Ridet J-M, Bauchot M-L. in Fishbase. www.fishbase.org. date of access: Apr.-13-17
Cyprinodontiformes	Cyprinodontiformes	Poeciliidae	Poecilia	reticulata		Poecilia_reticulata	1	unknown	Mass	0.1	0.0029			unknown		Bauchot R, Diagne M, Platel R, Ridet J-M, Bauchot M-L. in Fishbase. www.fishbase.org. date of access: Apr.-13-17
Cyprinodontiformes	Cyprinodontiformes	Poeciliidae	Poecilia	reticulata		Poecilia_reticulata	1	unknown	Mass	0.1	0.0032			unknown		Bauchot R, Diagne M, Platel R, Ridet J-M, Bauchot M-L. in Fishbase. www.fishbase.org. date of access: Apr.-13-17
Cyprinodontiformes	Cyprinodontiformes	Poeciliidae	Poecilia	reticulata		Poecilia_reticulata	1	unknown	Mass	0.1	0.0033			unknown		Bauchot R, Diagne M, Platel R, Ridet J-M, Bauchot M-L. in Fishbase. www.fishbase.org. date of access: Apr.-13-17
Cyprinodontiformes	Cyprinodontiformes	Poeciliidae	Poecilia	reticulata		Poecilia_reticulata	1	unknown	Mass	0.2	0.0047			unknown		Bauchot R, Diagne M, Platel R, Ridet J-M, Bauchot M-L. in Fishbase. www.fishbase.org. date of access: Apr.-13-17
Cyprinodontiformes	Cyprinodontiformes	Poeciliidae	Poecilia	reticulata		Poecilia_reticulata	1	unknown	Mass	0.2	0.0052			unknown		Bauchot R, Diagne M, Platel R, Ridet J-M, Bauchot M-L. in Fishbase. www.fishbase.org. date of access: Apr.-13-17
Cyprinodontiformes	Cyprinodontiformes	Poeciliidae	Poecilia	reticulata		Poecilia_reticulata	1	unknown	Mass	0.3	0.0058			unknown		Bauchot R, Diagne M, Platel R, Ridet J-M, Bauchot M-L. in Fishbase. www.fishbase.org. date of access: Apr.-13-17
Esociformes	Esociformes	Esocidae	Esox	lucius		Esox_lucius	2	f	Mass	373.8	0.535			unknown		Crile G and Quiring DP (1940) Ohio J Sci 40:219-259.
Esociformes	Esociformes	Esocidae	Esox	lucius		Esox_lucius	4	m	Mass	352.3	0.464			unknown		Crile G and Quiring DP (1940) Ohio J Sci 40:219-259.
Esociformes	Esociformes	Esocidae	Esox	lucius		Esox_lucius	1	unknown	Mass	11500	2.85			unknown		Albert JS et al. (1999) Proceedings of the 5th Indo-Pacific Fish Conference (Seret B, Sire J-Y, eds), pp 647-656
Esociformes	Esociformes	Esocidae	Esox	lucius		Esox_lucius	1	unknown	Mass	820	0.597			unknown		Crile G and Quiring DP (1940) Ohio J Sci 40:219-259.
Esociformes	Esociformes	Esocidae	Esox	lucius		Esox_lucius	1	unknown	Mass	12700	4.86			unknown		Dubois E (1913) On the relation between the quantity of brain and the size of the body in vertebrates
Esociformes	Esociformes	Umbridae	Umbra	krameri		Umbra_krameri	1	unknown	Mass	6.44	0.028	7.4		unknown		Albert JS et al. (1999) Proceedings of the 5th Indo-Pacific Fish Conference (Seret B, Sire J-Y, eds), pp 647-656
Gadiformes	Gadiformes	Gadidae	Boreogadus	saida		Boreogadus_saida	1	unknown	Mass	45	0.202			unknown		Bauchot R, Diagne M, Platel R, Ridet J-M, Bauchot M-L. in Fishbase. www.fishbase.org. date of access: Apr.-13-17
Gadiformes	Gadiformes	Gadidae	Boreogadus	saida		Boreogadus_saida	1	unknown	Mass	45	0.217			unknown		Bauchot R, Diagne M, Platel R, Ridet J-M, Bauchot M-L. in Fishbase. www.fishbase.org. date of access: Apr.-13-17
Gadiformes	Gadiformes	Gadidae	Boreogadus	saida		Boreogadus_saida	1	unknown	Mass	50	0.1607			unknown		Bauchot R, Diagne M, Platel R, Ridet J-M, Bauchot M-L. in Fishbase. www.fishbase.org. date of access: Apr.-13-17
Gadiformes	Gadiformes	Gadidae	Boreogadus	saida		Boreogadus_saida	1	unknown	Mass	50	0.257			unknown		Bauchot R, Diagne M, Platel R, Ridet J-M, Bauchot M-L. in Fishbase. www.fishbase.org. date of access: Apr.-13-17
Gadiformes	Gadiformes	Gadidae	Eleginus	nawaga		Eleginus_nawaga	1	unknown	Mass	27	0.133			unknown		Bauchot R, Diagne M, Platel R, Ridet J-M, Bauchot M-L. in Fishbase. www.fishbase.org. date of access: Apr.-13-17
Gadiformes	Gadiformes	Gadidae	Eleginus	nawaga		Eleginus_nawaga	1	unknown	Mass	57.9	0.19			unknown		Bauchot R, Diagne M, Platel R, Ridet J-M, Bauchot M-L. in Fishbase. www.fishbase.org. date of access: Apr.-13-17
Gadiformes	Gadiformes	Gadidae	Eleginus	nawaga		Eleginus_nawaga	1	unknown	Mass	71.9	0.196			unknown		Bauchot R, Diagne M, Platel R, Ridet J-M, Bauchot M-L. in Fishbase. www.fishbase.org. date of access: Apr.-13-17
Gadiformes	Gadiformes	Gadidae	Eleginus	nawaga		Eleginus_nawaga	1	unknown	Mass	105	0.282			unknown		Bauchot R, Diagne M, Platel R, Ridet J-M, Bauchot M-L. in Fishbase. www.fishbase.org. date of access: Apr.-13-17
Gadiformes	Gadiformes	Gadidae	Eleginus	nawaga		Eleginus_nawaga	1	unknown	Mass	137	0.326			unknown		Bauchot R, Diagne M, Platel R, Ridet J-M, Bauchot M-L. in Fishbase. www.fishbase.org. date of access: Apr.-13-17
Gadiformes	Gadiformes	Gadidae	Gadiculus	argenteus		Gadiculus_argenteus	1	unknown	Mass	12	0.103			unknown		Bauchot R, Diagne M, Platel R, Ridet J-M, Bauchot M-L. in Fishbase. www.fishbase.org. date of access: Apr.-13-17
Gadiformes	Gadiformes	Gadidae	Gadiculus	argenteus		Gadiculus_argenteus	1	unknown	Mass	26	0.137			unknown		Bauchot R, Diagne M, Platel R, Ridet J-M, Bauchot M-L. in Fishbase. www.fishbase.org. date of access: Apr.-13-17
Gadiformes	Gadiformes	Gadidae	Gadiculus	argenteus		Gadiculus_argenteus	1	unknown	Mass	39	0.11			unknown		Bauchot R, Diagne M, Platel R, Ridet J-M, Bauchot M-L. in Fishbase. www.fishbase.org. date of access: Apr.-13-17
Gadiformes	Gadiformes	Gadidae	Gadiculus	argenteus		Gadiculus_argenteus	1	unknown	Mass	40	0.146			unknown		Bauchot R, Diagne M, Platel R, Ridet J-M, Bauchot M-L. in Fishbase. www.fishbase.org. date of access: Apr.-13-17
Gadiformes	Gadiformes	Gadidae	Gadus	morhua		Gadus_morhua	1	f	Mass	10600	5.0401		101.06	Adult	Gadus callarias	Crile G and Quiring DP (1940) Ohio J Sci 40:219-259.
Gadiformes	Gadiformes	Gadidae	Gadus	morhua		Gadus_morhua	3	f	Mass	2625	2.218		64.23	Adult	Gadus callarias	Crile G and Quiring DP (1940) Ohio J Sci 40:219-259.
Gadiformes	Gadiformes	Gadidae	Gadus	morhua		Gadus_morhua	3	m	Mass	2518	1.9792		63.37	Adult	Gadus callarias	Crile G and Quiring DP (1940) Ohio J Sci 40:219-259.
Gadiformes	Gadiformes	Gadidae	Gadus	morhua		Gadus_morhua	1	unknown	Mass	4237.52	1.588		75.04	Adult		Bauchot R, Diagne M, Platel R, Ridet J-M, Bauchot M-L. in Fishbase. www.fishbase.org. date of access: Apr.-13-17
Gadiformes	Gadiformes	Gadidae	Gadus	morhua		Gadus_morhua	1	unknown	Mass	349.9	0.581		33.39	Adult		Bauchot R, Diagne M, Platel R, Ridet J-M, Bauchot M-L. in Fishbase. www.fishbase.org. date of access: Apr.-13-17
Gadiformes	Gadiformes	Gadidae	Gadus	morhua		Gadus_morhua	1	unknown	Mass	610	0.759		39.99	Adult		Bauchot R, Diagne M, Platel R, Ridet J-M, Bauchot M-L. in Fishbase. www.fishbase.org. date of access: Apr.-13-17
Gadiformes	Gadiformes	Gadidae	Gadus	morhua		Gadus_morhua	1	unknown	Mass	830	0.92		44.2	Adult		Bauchot R, Diagne M, Platel R, Ridet J-M, Bauchot M-L. in Fishbase. www.fishbase.org. date of access: Apr.-13-17
Gadiformes	Gadiformes	Gadidae	Gadus	morhua		Gadus_morhua	1	unknown	Mass	991	0.908		46.82	Adult		Bauchot R, Diagne M, Platel R, Ridet J-M, Bauchot M-L. in Fishbase. www.fishbase.org. date of access: Apr.-13-17
Gadiformes	Gadiformes	Gadidae	Gadus	morhua		Gadus_morhua	1	unknown	Mass	1069	0.977		47.98	Adult		Bauchot R, Diagne M, Platel R, Ridet J-M, Bauchot M-L. in Fishbase. www.fishbase.org. date of access: Apr.-13-17
Gadiformes	Gadiformes	Gadidae	Gadus	morhua		Gadus_morhua	1	unknown	Mass	1250	1.005		50.48	Adult		Bauchot R, Diagne M, Platel R, Ridet J-M, Bauchot M-L. in Fishbase. www.fishbase.org. date of access: Apr.-13-17
Gadiformes	Gadiformes	Gadidae	Gadus	morhua		Gadus_morhua	1	unknown	Mass	1349	1.002		51.75	Adult		Bauchot R, Diagne M, Platel R, Ridet J-M, Bauchot M-L. in Fishbase. www.fishbase.org. date of access: Apr.-13-17
Gadiformes	Gadiformes	Gadidae	Gadus	morhua		Gadus_morhua	1	unknown	Mass	1622	1.151		54.94	Adult		Bauchot R, Diagne M, Platel R, Ridet J-M, Bauchot M-L. in Fishbase. www.fishbase.org. date of access: Apr.-13-17
Gadiformes	Gadiformes	Gadidae	Gadus	morhua		Gadus_morhua	1	unknown	Mass	1941	1.1722		58.24	Adult		Bauchot R, Diagne M, Platel R, Ridet J-M, Bauchot M-L. in Fishbase. www.fishbase.org. date of access: Apr.-13-17
Gadiformes	Gadiformes	Gadidae	Gadus	morhua		Gadus_morhua	1	unknown	Mass	2099	1.486		59.73	Adult		Bauchot R, Diagne M, Platel R, Ridet J-M, Bauchot M-L. in Fishbase. www.fishbase.org. date of access: Apr.-13-17
Gadiformes	Gadiformes	Gadidae	Gadus	morhua		Gadus_morhua	1	unknown	Mass	2249	1.4		61.09	Adult		Bauchot R, Diagne M, Platel R, Ridet J-M, Bauchot M-L. in Fishbase. www.fishbase.org. date of access: Apr.-13-17
Gadiformes	Gadiformes	Gadidae	Gadus	morhua		Gadus_morhua	1	unknown	Mass	2301	1.343		61.54	Adult		Bauchot R, Diagne M, Platel R, Ridet J-M, Bauchot M-L. in Fishbase. www.fishbase.org. date of access: Apr.-13-17
Gadiformes	Gadiformes	Gadidae	Gadus	morhua		Gadus_morhua	1	unknown	Mass	2500	1.524		63.22	Adult		Bauchot R, Diagne M, Platel R, Ridet J-M, Bauchot M-L. in Fishbase. www.fishbase.org. date of access: Apr.-13-17
Gadiformes	Gadiformes	Gadidae	Gadus	morhua		Gadus_morhua	1	unknown	Mass	2600.2	1.722		64.03	Adult		Bauchot R, Diagne M, Platel R, Ridet J-M, Bauchot M-L. in Fishbase. www.fishbase.org. date of access: Apr.-13-17
Gadiformes	Gadiformes	Gadidae	Gadus	morhua		Gadus_morhua	1	unknown	Mass	2649	1.489		64.42	Adult		Bauchot R, Diagne M, Platel R, Ridet J-M, Bauchot M-L. in Fishbase. www.fishbase.org. date of access: Apr.-13-17
Gadiformes	Gadiformes	Gadidae	Gadus	morhua		Gadus_morhua	1	unknown	Mass	2931	1.762		66.57	Adult		Bauchot R, Diagne M, Platel R, Ridet J-M, Bauchot M-L. in Fishbase. www.fishbase.org. date of access: Apr.-13-17
Gadiformes	Gadiformes	Gadidae	Gadus	morhua		Gadus_morhua	1	unknown	Mass	3396	1.663		69.83	Adult		Bauchot R, Diagne M, Platel R, Ridet J-M, Bauchot M-L. in Fishbase. www.fishbase.org. date of access: Apr.-13-17
Gadiformes	Gadiformes	Gadidae	Gadus	morhua		Gadus_morhua	1	unknown	Mass	3451	1.726		70.2	Adult		Bauchot R, Diagne M, Platel R, Ridet J-M, Bauchot M-L. in Fishbase. www.fishbase.org. date of access: Apr.-13-17
Gadiformes	Gadiformes	Gadidae	Gadus	morhua		Gadus_morhua	1	unknown	Mass	3500	2.089		70.52	Adult		Bauchot R, Diagne M, Platel R, Ridet J-M, Bauchot M-L. in Fishbase. www.fishbase.org. date of access: Apr.-13-17
Gadiformes	Gadiformes	Gadidae	Gadus	morhua		Gadus_morhua	1	unknown	Mass	3999	1.7579		73.64	Adult		Bauchot R, Diagne M, Platel R, Ridet J-M, Bauchot M-L. in Fishbase. www.fishbase.org. date of access: Apr.-13-17
Gadiformes	Gadiformes	Gadidae	Gadus	morhua		Gadus_morhua	1	unknown	Mass	4295	1.884		75.37	Adult		Bauchot R, Diagne M, Platel R, Ridet J-M, Bauchot M-L. in Fishbase. www.fishbase.org. date of access: Apr.-13-17
Gadiformes	Gadiformes	Gadidae	Gadus	morhua		Gadus_morhua	1	unknown	Mass	4498	1.585		76.5	Adult		Bauchot R, Diagne M, Platel R, Ridet J-M, Bauchot M-L. in Fishbase. www.fishbase.org. date of access: Apr.-13-17
Gadiformes	Gadiformes	Gadidae	Gadus	morhua		Gadus_morhua	1	unknown	Mass	4797	1.7298		78.12	Adult		Bauchot R, Diagne M, Platel R, Ridet J-M, Bauchot M-L. in Fishbase. www.fishbase.org. date of access: Apr.-13-17
Gadiformes	Gadiformes	Gadidae	Gadus	morhua		Gadus_morhua	1	unknown	Mass	5100	1.94		79.69	Adult		Bauchot R, Diagne M, Platel R, Ridet J-M, Bauchot M-L. in Fishbase. www.fishbase.org. date of access: Apr.-13-17
Gadiformes	Gadiformes	Gadidae	Gadus	morhua		Gadus_morhua	1	unknown	Mass	5105	1.941		79.71	Adult		Bauchot R, Diagne M, Platel R, Ridet J-M, Bauchot M-L. in Fishbase. www.fishbase.org. date of access: Apr.-13-17
Gadiformes	Gadiformes	Gadidae	Gadus	morhua		Gadus_morhua	1	unknown	Mass	5495.4	1.849		81.64	Adult		Bauchot R, Diagne M, Platel R, Ridet J-M, Bauchot M-L. in Fishbase. www.fishbase.org. date of access: Apr.-13-17
Gadiformes	Gadiformes	Gadidae	Gadus	morhua		Gadus_morhua	1	unknown	Mass	6998.4	2.2233		88.31	Adult		Bauchot R, Diagne M, Platel R, Ridet J-M, Bauchot M-L. in Fishbase. www.fishbase.org. date of access: Apr.-13-17
Gadiformes	Gadiformes	Gadidae	Gadus	morhua		Gadus_morhua	1	unknown	Mass	7096	1.995		88.71	Adult		Bauchot R, Diagne M, Platel R, Ridet J-M, Bauchot M-L. in Fishbase. www.fishbase.org. date of access: Apr.-13-17
Gadiformes	Gadiformes	Gadidae	Gadus	morhua		Gadus_morhua	1	unknown	Mass	9205	2.649		96.53	Adult		Bauchot R, Diagne M, Platel R, Ridet J-M, Bauchot M-L. in Fishbase. www.fishbase.org. date of access: Apr.-13-17
Gadiformes	Gadiformes	Gadidae	Gadus	morhua		Gadus_morhua	1	unknown	Mass	9705	2.685		98.2	Adult		Bauchot R, Diagne M, Platel R, Ridet J-M, Bauchot M-L. in Fishbase. www.fishbase.org. date of access: Apr.-13-17
Gadiformes	Gadiformes	Gadidae	Gadus	morhua		Gadus_morhua	1	unknown	Mass	10399	2.2029		100.43	Adult		Bauchot R, Diagne M, Platel R, Ridet J-M, Bauchot M-L. in Fishbase. www.fishbase.org. date of access: Apr.-13-17
Gadiformes	Gadiformes	Gadidae	Gadus	morhua		Gadus_morhua	1	unknown	Mass	11995	2.904		105.19	Adult		Bauchot R, Diagne M, Platel R, Ridet J-M, Bauchot M-L. in Fishbase. www.fishbase.org. date of access: Apr.-13-17
Gadiformes	Gadiformes	Gadidae	Gadus	morhua		Gadus_morhua	1	unknown	Mass	14191	3.069		111.1	Adult		Bauchot R, Diagne M, Platel R, Ridet J-M, Bauchot M-L. in Fishbase. www.fishbase.org. date of access: Apr.-13-17
Gadiformes	Gadiformes	Gadidae	Gadus	morhua		Gadus_morhua	1	unknown	Mass	19679	3.381		123.54	Adult		Bauchot R, Diagne M, Platel R, Ridet J-M, Bauchot M-L. in Fishbase. www.fishbase.org. date of access: Apr.-13-17
Gadiformes	Gadiformes	Gadidae	Gadus	morhua		Gadus_morhua	1	unknown	Mass	120	0.4375		23.59	unknown		Bauchot R, Diagne M, Platel R, Ridet J-M, Bauchot M-L. in Fishbase. www.fishbase.org. date of access: Apr.-13-17
Gadiformes	Gadiformes	Gadidae	Gadus	morhua		Gadus_morhua	1	unknown	Mass	175	0.432		26.66	unknown		Bauchot R, Diagne M, Platel R, Ridet J-M, Bauchot M-L. in Fishbase. www.fishbase.org. date of access: Apr.-13-17
Gadiformes	Gadiformes	Gadidae	Gadus	morhua		Gadus_morhua	1	unknown	Mass	236	0.471		29.38	unknown		Bauchot R, Diagne M, Platel R, Ridet J-M, Bauchot M-L. in Fishbase. www.fishbase.org. date of access: Apr.-13-17
Gadiformes	Gadiformes	Gadidae	Gadus	morhua		Gadus_morhua	1	unknown	Mass	250	0.5321		29.94	unknown		Bauchot R, Diagne M, Platel R, Ridet J-M, Bauchot M-L. in Fishbase. www.fishbase.org. date of access: Apr.-13-17
Gadiformes	Gadiformes	Gadidae	Gadus	morhua		Gadus_morhua	1	unknown	Mass	222	0.342		28.8	unknown		Nilsson GE et al. (2000) Proc. R. Soc. B 267:1335-1339	Oslo Fjord
Gadiformes	Gadiformes	Gadidae	Gadus	ogac		Gadus_ogac	1	unknown	Mass	951	1.186			Adult		Bauchot R, Diagne M, Platel R, Ridet J-M, Bauchot M-L. in Fishbase. www.fishbase.org. date of access: Apr.-13-17
Gadiformes	Gadiformes	Gadidae	Gadus	ogac		Gadus_ogac	1	unknown	Mass	1510	1.524			Adult		Bauchot R, Diagne M, Platel R, Ridet J-M, Bauchot M-L. in Fishbase. www.fishbase.org. date of access: Apr.-13-17
Gadiformes	Gadiformes	Gadidae	Gadus	ogac		Gadus_ogac	1	unknown	Mass	2128	1.343			Adult		Bauchot R, Diagne M, Platel R, Ridet J-M, Bauchot M-L. in Fishbase. www.fishbase.org. date of access: Apr.-13-17
Gadiformes	Gadiformes	Gadidae	Gadus	ogac		Gadus_ogac	1	unknown	Mass	2350	1.734			Adult		Bauchot R, Diagne M, Platel R, Ridet J-M, Bauchot M-L. in Fishbase. www.fishbase.org. date of access: Apr.-13-17
Gadiformes	Gadiformes	Gadidae	Gadus	ogac		Gadus_ogac	1	unknown	Mass	2500	1.531			Adult		Bauchot R, Diagne M, Platel R, Ridet J-M, Bauchot M-L. in Fishbase. www.fishbase.org. date of access: Apr.-13-17
Gadiformes	Gadiformes	Gadidae	Gadus	ogac		Gadus_ogac	1	unknown	Mass	2999.2	1.778			Adult		Bauchot R, Diagne M, Platel R, Ridet J-M, Bauchot M-L. in Fishbase. www.fishbase.org. date of access: Apr.-13-17
Gadiformes	Gadiformes	Gadidae	Gadus	ogac		Gadus_ogac	1	unknown	Mass	3229	1.667			Adult		Bauchot R, Diagne M, Platel R, Ridet J-M, Bauchot M-L. in Fishbase. www.fishbase.org. date of access: Apr.-13-17
Gadiformes	Gadiformes	Gadidae	Gadus	ogac		Gadus_ogac	1	unknown	Mass	200	0.454			unknown		Bauchot R, Diagne M, Platel R, Ridet J-M, Bauchot M-L. in Fishbase. www.fishbase.org. date of access: Apr.-13-17
Gadiformes	Gadiformes	Gadidae	Melanogrammus	aeglefinus		Melanogrammus_aeglefinus	6	f	Mass	3275	2.0502		68.99	Adult		Crile G and Quiring DP (1940) Ohio J Sci 40:219-259.
Gadiformes	Gadiformes	Gadidae	Melanogrammus	aeglefinus		Melanogrammus_aeglefinus	1	unknown	Mass	1500	1.445		53.72	Adult		Bauchot R, Diagne M, Platel R, Ridet J-M, Bauchot M-L. in Fishbase. www.fishbase.org. date of access: Apr.-13-17
Gadiformes	Gadiformes	Gadidae	Melanogrammus	aeglefinus		Melanogrammus_aeglefinus	1	unknown	Mass	1698	1.514		55.89	Adult		Bauchot R, Diagne M, Platel R, Ridet J-M, Bauchot M-L. in Fishbase. www.fishbase.org. date of access: Apr.-13-17
Gadiformes	Gadiformes	Gadidae	Melanogrammus	aeglefinus		Melanogrammus_aeglefinus	1	unknown	Mass	4395.4	2.2233		75.82	Adult		Bauchot R, Diagne M, Platel R, Ridet J-M, Bauchot M-L. in Fishbase. www.fishbase.org. date of access: Apr.-13-17
Gadiformes	Gadiformes	Gadidae	Melanogrammus	aeglefinus		Melanogrammus_aeglefinus	1	unknown	Mass	30	0.21		15.33	unknown		Bauchot R, Diagne M, Platel R, Ridet J-M, Bauchot M-L. in Fishbase. www.fishbase.org. date of access: Apr.-13-17
Gadiformes	Gadiformes	Gadidae	Melanogrammus	aeglefinus		Melanogrammus_aeglefinus	1	unknown	Mass	319	0.675		32.71	unknown		Bauchot R, Diagne M, Platel R, Ridet J-M, Bauchot M-L. in Fishbase. www.fishbase.org. date of access: Apr.-13-17
Gadiformes	Gadiformes	Gadidae	Melanogrammus	aeglefinus		Melanogrammus_aeglefinus	1	unknown	Mass	540	0.7195		38.72	unknown		Bauchot R, Diagne M, Platel R, Ridet J-M, Bauchot M-L. in Fishbase. www.fishbase.org. date of access: Apr.-13-17
Gadiformes	Gadiformes	Gadidae	Merlangius	merlangus		Merlangius_merlangus	1	unknown	Mass	335	0.202		34.67	Adult		Bauchot R, Diagne M, Platel R, Ridet J-M, Bauchot M-L. in Fishbase. www.fishbase.org. date of access: Apr.-13-17
Gadiformes	Gadiformes	Gadidae	Merlangius	merlangus		Merlangius_merlangus	1	unknown	Mass	800	0.771		46.07	Adult		Bauchot R, Diagne M, Platel R, Ridet J-M, Bauchot M-L. in Fishbase. www.fishbase.org. date of access: Apr.-13-17
Gadiformes	Gadiformes	Gadidae	Merlangius	merlangus		Merlangius_merlangus	1	unknown	Mass	820	0.7194		46.45	Adult		Bauchot R, Diagne M, Platel R, Ridet J-M, Bauchot M-L. in Fishbase. www.fishbase.org. date of access: Apr.-13-17
Gadiformes	Gadiformes	Gadidae	Merlangius	merlangus		Merlangius_merlangus	1	unknown	Mass	7.4	0.071		9.97	unknown		Bauchot R, Diagne M, Platel R, Ridet J-M, Bauchot M-L. in Fishbase. www.fishbase.org. date of access: Apr.-13-17
Gadiformes	Gadiformes	Gadidae	Merlangius	merlangus		Merlangius_merlangus	1	unknown	Mass	8.7	0.0839		10.51	unknown		Bauchot R, Diagne M, Platel R, Ridet J-M, Bauchot M-L. in Fishbase. www.fishbase.org. date of access: Apr.-13-17
Gadiformes	Gadiformes	Gadidae	Merlangius	merlangus		Merlangius_merlangus	1	unknown	Mass	9	0.075		10.63	unknown		Bauchot R, Diagne M, Platel R, Ridet J-M, Bauchot M-L. in Fishbase. www.fishbase.org. date of access: Apr.-13-17
Gadiformes	Gadiformes	Gadidae	Merlangius	merlangus		Merlangius_merlangus	1	unknown	Mass	10.3	0.0879		11.11	unknown		Bauchot R, Diagne M, Platel R, Ridet J-M, Bauchot M-L. in Fishbase. www.fishbase.org. date of access: Apr.-13-17
Gadiformes	Gadiformes	Gadidae	Merlangius	merlangus		Merlangius_merlangus	1	unknown	Mass	11.4	0.0861		11.48	unknown		Bauchot R, Diagne M, Platel R, Ridet J-M, Bauchot M-L. in Fishbase. www.fishbase.org. date of access: Apr.-13-17
Gadiformes	Gadiformes	Gadidae	Merlangius	merlangus		Merlangius_merlangus	1	unknown	Mass	12.8	0.103		11.93	unknown		Bauchot R, Diagne M, Platel R, Ridet J-M, Bauchot M-L. in Fishbase. www.fishbase.org. date of access: Apr.-13-17
Gadiformes	Gadiformes	Gadidae	Merlangius	merlangus		Merlangius_merlangus	1	unknown	Mass	14.4	0.092		12.4	unknown		Bauchot R, Diagne M, Platel R, Ridet J-M, Bauchot M-L. in Fishbase. www.fishbase.org. date of access: Apr.-13-17
Gadiformes	Gadiformes	Gadidae	Micromesistius	poutassou		Micromesistius_poutassou	1	unknown	Mass	50	0.247		20.12	Adult		Bauchot R, Diagne M, Platel R, Ridet J-M, Bauchot M-L. in Fishbase. www.fishbase.org. date of access: Apr.-13-17
Gadiformes	Gadiformes	Gadidae	Micromesistius	poutassou		Micromesistius_poutassou	1	unknown	Mass	110	0.396		25.82	Adult		Bauchot R, Diagne M, Platel R, Ridet J-M, Bauchot M-L. in Fishbase. www.fishbase.org. date of access: Apr.-13-17
Gadiformes	Gadiformes	Gadidae	Micromesistius	poutassou		Micromesistius_poutassou	1	unknown	Mass	120	0.333		26.54	Adult		Bauchot R, Diagne M, Platel R, Ridet J-M, Bauchot M-L. in Fishbase. www.fishbase.org. date of access: Apr.-13-17
Gadiformes	Gadiformes	Gadidae	Micromesistius	poutassou		Micromesistius_poutassou	1	unknown	Mass	150	0.472		28.48	Adult		Bauchot R, Diagne M, Platel R, Ridet J-M, Bauchot M-L. in Fishbase. www.fishbase.org. date of access: Apr.-13-17
Gadiformes	Gadiformes	Gadidae	Micromesistius	poutassou		Micromesistius_poutassou	1	unknown	Mass	230	0.63		32.6	Adult		Bauchot R, Diagne M, Platel R, Ridet J-M, Bauchot M-L. in Fishbase. www.fishbase.org. date of access: Apr.-13-17
Gadiformes	Gadiformes	Gadidae	Micromesistius	poutassou		Micromesistius_poutassou	1	unknown	Mass	250	0.508		33.48	Adult		Bauchot R, Diagne M, Platel R, Ridet J-M, Bauchot M-L. in Fishbase. www.fishbase.org. date of access: Apr.-13-17
Gadiformes	Gadiformes	Gadidae	Micromesistius	poutassou		Micromesistius_poutassou	1	unknown	Mass	250	0.565		33.48	Adult		Bauchot R, Diagne M, Platel R, Ridet J-M, Bauchot M-L. in Fishbase. www.fishbase.org. date of access: Apr.-13-17
Gadiformes	Gadiformes	Gadidae	Micromesistius	poutassou		Micromesistius_poutassou	1	unknown	Mass	285	0.687		34.89	Adult		Bauchot R, Diagne M, Platel R, Ridet J-M, Bauchot M-L. in Fishbase. www.fishbase.org. date of access: Apr.-13-17
Gadiformes	Gadiformes	Gadidae	Micromesistius	poutassou		Micromesistius_poutassou	1	unknown	Mass	13	0.0745		13.13	unknown		Bauchot R, Diagne M, Platel R, Ridet J-M, Bauchot M-L. in Fishbase. www.fishbase.org. date of access: Apr.-13-17
Gadiformes	Gadiformes	Gadidae	Pollachius	pollachius		Pollachius_pollachius	1	unknown	Mass	5997.9	2.218		84.78	Adult		Bauchot R, Diagne M, Platel R, Ridet J-M, Bauchot M-L. in Fishbase. www.fishbase.org. date of access: Apr.-13-17
Gadiformes	Gadiformes	Gadidae	Pollachius	pollachius		Pollachius_pollachius	1	unknown	Mass	8.2	0.105		9.96	unknown		Bauchot R, Diagne M, Platel R, Ridet J-M, Bauchot M-L. in Fishbase. www.fishbase.org. date of access: Apr.-13-17
Gadiformes	Gadiformes	Gadidae	Pollachius	pollachius		Pollachius_pollachius	1	unknown	Mass	11.6	0.116		11.15	unknown		Bauchot R, Diagne M, Platel R, Ridet J-M, Bauchot M-L. in Fishbase. www.fishbase.org. date of access: Apr.-13-17
Gadiformes	Gadiformes	Gadidae	Pollachius	pollachius		Pollachius_pollachius	1	unknown	Mass	11.9	0.128		11.24	unknown		Bauchot R, Diagne M, Platel R, Ridet J-M, Bauchot M-L. in Fishbase. www.fishbase.org. date of access: Apr.-13-17
Gadiformes	Gadiformes	Gadidae	Pollachius	pollachius		Pollachius_pollachius	1	unknown	Mass	12.4	0.139		11.39	unknown		Bauchot R, Diagne M, Platel R, Ridet J-M, Bauchot M-L. in Fishbase. www.fishbase.org. date of access: Apr.-13-17
Gadiformes	Gadiformes	Gadidae	Pollachius	pollachius		Pollachius_pollachius	1	unknown	Mass	13.1	0.137		11.6	unknown		Bauchot R, Diagne M, Platel R, Ridet J-M, Bauchot M-L. in Fishbase. www.fishbase.org. date of access: Apr.-13-17
Gadiformes	Gadiformes	Gadidae	Pollachius	pollachius		Pollachius_pollachius	1	unknown	Mass	13.8	0.147		11.8	unknown		Bauchot R, Diagne M, Platel R, Ridet J-M, Bauchot M-L. in Fishbase. www.fishbase.org. date of access: Apr.-13-17
Gadiformes	Gadiformes	Gadidae	Pollachius	pollachius		Pollachius_pollachius	1	unknown	Mass	14.9	0.127		12.09	unknown		Bauchot R, Diagne M, Platel R, Ridet J-M, Bauchot M-L. in Fishbase. www.fishbase.org. date of access: Apr.-13-17
Gadiformes	Gadiformes	Gadidae	Pollachius	pollachius		Pollachius_pollachius	1	unknown	Mass	15.3	0.137		12.2	unknown		Bauchot R, Diagne M, Platel R, Ridet J-M, Bauchot M-L. in Fishbase. www.fishbase.org. date of access: Apr.-13-17
Gadiformes	Gadiformes	Gadidae	Pollachius	pollachius		Pollachius_pollachius	1	unknown	Mass	15.6	0.133		12.28	unknown		Bauchot R, Diagne M, Platel R, Ridet J-M, Bauchot M-L. in Fishbase. www.fishbase.org. date of access: Apr.-13-17
Gadiformes	Gadiformes	Gadidae	Pollachius	pollachius		Pollachius_pollachius	1	unknown	Mass	15.9	0.136		12.35	unknown		Bauchot R, Diagne M, Platel R, Ridet J-M, Bauchot M-L. in Fishbase. www.fishbase.org. date of access: Apr.-13-17
Gadiformes	Gadiformes	Gadidae	Pollachius	pollachius		Pollachius_pollachius	1	unknown	Mass	16	0.139		12.38	unknown		Bauchot R, Diagne M, Platel R, Ridet J-M, Bauchot M-L. in Fishbase. www.fishbase.org. date of access: Apr.-13-17
Gadiformes	Gadiformes	Gadidae	Pollachius	pollachius		Pollachius_pollachius	1	unknown	Mass	16.2	0.161		12.43	unknown		Bauchot R, Diagne M, Platel R, Ridet J-M, Bauchot M-L. in Fishbase. www.fishbase.org. date of access: Apr.-13-17
Gadiformes	Gadiformes	Gadidae	Pollachius	pollachius		Pollachius_pollachius	1	unknown	Mass	16.5	0.13		12.5	unknown		Bauchot R, Diagne M, Platel R, Ridet J-M, Bauchot M-L. in Fishbase. www.fishbase.org. date of access: Apr.-13-17
Gadiformes	Gadiformes	Gadidae	Pollachius	pollachius		Pollachius_pollachius	1	unknown	Mass	17.1	0.149		12.65	unknown		Bauchot R, Diagne M, Platel R, Ridet J-M, Bauchot M-L. in Fishbase. www.fishbase.org. date of access: Apr.-13-17
Gadiformes	Gadiformes	Gadidae	Pollachius	pollachius		Pollachius_pollachius	1	unknown	Mass	17.8	0.14		12.81	unknown		Bauchot R, Diagne M, Platel R, Ridet J-M, Bauchot M-L. in Fishbase. www.fishbase.org. date of access: Apr.-13-17
Gadiformes	Gadiformes	Gadidae	Pollachius	pollachius		Pollachius_pollachius	1	unknown	Mass	17.8	0.147		12.81	unknown		Bauchot R, Diagne M, Platel R, Ridet J-M, Bauchot M-L. in Fishbase. www.fishbase.org. date of access: Apr.-13-17
Gadiformes	Gadiformes	Gadidae	Pollachius	pollachius		Pollachius_pollachius	1	unknown	Mass	17.8	0.155		12.81	unknown		Bauchot R, Diagne M, Platel R, Ridet J-M, Bauchot M-L. in Fishbase. www.fishbase.org. date of access: Apr.-13-17
Gadiformes	Gadiformes	Gadidae	Pollachius	pollachius		Pollachius_pollachius	1	unknown	Mass	18.2	0.1589		12.91	unknown		Bauchot R, Diagne M, Platel R, Ridet J-M, Bauchot M-L. in Fishbase. www.fishbase.org. date of access: Apr.-13-17
Gadiformes	Gadiformes	Gadidae	Pollachius	pollachius		Pollachius_pollachius	1	unknown	Mass	18.5	0.17		12.97	unknown		Bauchot R, Diagne M, Platel R, Ridet J-M, Bauchot M-L. in Fishbase. www.fishbase.org. date of access: Apr.-13-17
Gadiformes	Gadiformes	Gadidae	Pollachius	pollachius		Pollachius_pollachius	1	unknown	Mass	18.9	0.155		13.06	unknown		Bauchot R, Diagne M, Platel R, Ridet J-M, Bauchot M-L. in Fishbase. www.fishbase.org. date of access: Apr.-13-17
Gadiformes	Gadiformes	Gadidae	Pollachius	pollachius		Pollachius_pollachius	1	unknown	Mass	19	0.162		13.09	unknown		Bauchot R, Diagne M, Platel R, Ridet J-M, Bauchot M-L. in Fishbase. www.fishbase.org. date of access: Apr.-13-17
Gadiformes	Gadiformes	Gadidae	Pollachius	pollachius		Pollachius_pollachius	1	unknown	Mass	19.1	0.161		13.11	unknown		Bauchot R, Diagne M, Platel R, Ridet J-M, Bauchot M-L. in Fishbase. www.fishbase.org. date of access: Apr.-13-17
Gadiformes	Gadiformes	Gadidae	Pollachius	pollachius		Pollachius_pollachius	1	unknown	Mass	20.3	0.1641		13.37	unknown		Bauchot R, Diagne M, Platel R, Ridet J-M, Bauchot M-L. in Fishbase. www.fishbase.org. date of access: Apr.-13-17
Gadiformes	Gadiformes	Gadidae	Pollachius	pollachius		Pollachius_pollachius	1	unknown	Mass	21.6	0.157		13.64	unknown		Bauchot R, Diagne M, Platel R, Ridet J-M, Bauchot M-L. in Fishbase. www.fishbase.org. date of access: Apr.-13-17
Gadiformes	Gadiformes	Gadidae	Pollachius	pollachius		Pollachius_pollachius	1	unknown	Mass	21.8	0.148		13.68	unknown		Bauchot R, Diagne M, Platel R, Ridet J-M, Bauchot M-L. in Fishbase. www.fishbase.org. date of access: Apr.-13-17
Gadiformes	Gadiformes	Gadidae	Pollachius	pollachius		Pollachius_pollachius	1	unknown	Mass	24.3	0.16		14.18	unknown		Bauchot R, Diagne M, Platel R, Ridet J-M, Bauchot M-L. in Fishbase. www.fishbase.org. date of access: Apr.-13-17
Gadiformes	Gadiformes	Gadidae	Pollachius	pollachius		Pollachius_pollachius	1	unknown	Mass	24.9	0.169		14.29	unknown		Bauchot R, Diagne M, Platel R, Ridet J-M, Bauchot M-L. in Fishbase. www.fishbase.org. date of access: Apr.-13-17
Gadiformes	Gadiformes	Gadidae	Pollachius	pollachius		Pollachius_pollachius	1	unknown	Mass	25	0.202		14.31	unknown		Bauchot R, Diagne M, Platel R, Ridet J-M, Bauchot M-L. in Fishbase. www.fishbase.org. date of access: Apr.-13-17
Gadiformes	Gadiformes	Gadidae	Pollachius	pollachius		Pollachius_pollachius	1	unknown	Mass	26.2	0.195		14.53	unknown		Bauchot R, Diagne M, Platel R, Ridet J-M, Bauchot M-L. in Fishbase. www.fishbase.org. date of access: Apr.-13-17
Gadiformes	Gadiformes	Gadidae	Pollachius	pollachius		Pollachius_pollachius	1	unknown	Mass	26.6	0.226		14.6	unknown		Bauchot R, Diagne M, Platel R, Ridet J-M, Bauchot M-L. in Fishbase. www.fishbase.org. date of access: Apr.-13-17
Gadiformes	Gadiformes	Gadidae	Pollachius	pollachius		Pollachius_pollachius	1	unknown	Mass	32.9	0.402		15.64	unknown		Bauchot R, Diagne M, Platel R, Ridet J-M, Bauchot M-L. in Fishbase. www.fishbase.org. date of access: Apr.-13-17
Gadiformes	Gadiformes	Gadidae	Pollachius	pollachius		Pollachius_pollachius	1	unknown	Mass	44.3	0.404		17.23	unknown		Bauchot R, Diagne M, Platel R, Ridet J-M, Bauchot M-L. in Fishbase. www.fishbase.org. date of access: Apr.-13-17
Gadiformes	Gadiformes	Gadidae	Pollachius	pollachius		Pollachius_pollachius	1	unknown	Mass	91.8	0.4467		21.83	unknown		Bauchot R, Diagne M, Platel R, Ridet J-M, Bauchot M-L. in Fishbase. www.fishbase.org. date of access: Apr.-13-17
Gadiformes	Gadiformes	Gadidae	Pollachius	pollachius		Pollachius_pollachius	1	unknown	Mass	100	0.433		22.44	unknown		Bauchot R, Diagne M, Platel R, Ridet J-M, Bauchot M-L. in Fishbase. www.fishbase.org. date of access: Apr.-13-17
Gadiformes	Gadiformes	Gadidae	Pollachius	pollachius		Pollachius_pollachius	1	unknown	Mass	101	0.429		22.51	unknown		Bauchot R, Diagne M, Platel R, Ridet J-M, Bauchot M-L. in Fishbase. www.fishbase.org. date of access: Apr.-13-17
Gadiformes	Gadiformes	Gadidae	Pollachius	pollachius		Pollachius_pollachius	1	unknown	Mass	105	0.422		22.8	unknown		Bauchot R, Diagne M, Platel R, Ridet J-M, Bauchot M-L. in Fishbase. www.fishbase.org. date of access: Apr.-13-17
Gadiformes	Gadiformes	Gadidae	Pollachius	pollachius		Pollachius_pollachius	1	unknown	Mass	122	0.488		23.94	unknown		Bauchot R, Diagne M, Platel R, Ridet J-M, Bauchot M-L. in Fishbase. www.fishbase.org. date of access: Apr.-13-17
Gadiformes	Gadiformes	Gadidae	Pollachius	pollachius		Pollachius_pollachius	1	unknown	Mass	149	0.448		25.54	unknown		Bauchot R, Diagne M, Platel R, Ridet J-M, Bauchot M-L. in Fishbase. www.fishbase.org. date of access: Apr.-13-17
Gadiformes	Gadiformes	Gadidae	Pollachius	pollachius		Pollachius_pollachius	1	unknown	Mass	157	0.427		25.98	unknown		Bauchot R, Diagne M, Platel R, Ridet J-M, Bauchot M-L. in Fishbase. www.fishbase.org. date of access: Apr.-13-17
Gadiformes	Gadiformes	Gadidae	Pollachius	pollachius		Pollachius_pollachius	1	unknown	Mass	163	0.498		26.3	unknown		Bauchot R, Diagne M, Platel R, Ridet J-M, Bauchot M-L. in Fishbase. www.fishbase.org. date of access: Apr.-13-17
Gadiformes	Gadiformes	Gadidae	Pollachius	pollachius		Pollachius_pollachius	1	unknown	Mass	214	0.711		28.73	unknown		Bauchot R, Diagne M, Platel R, Ridet J-M, Bauchot M-L. in Fishbase. www.fishbase.org. date of access: Apr.-13-17
Gadiformes	Gadiformes	Gadidae	Pollachius	pollachius		Pollachius_pollachius	1	unknown	Mass	266	0.555		30.83	unknown		Bauchot R, Diagne M, Platel R, Ridet J-M, Bauchot M-L. in Fishbase. www.fishbase.org. date of access: Apr.-13-17
Gadiformes	Gadiformes	Gadidae	Pollachius	pollachius		Pollachius_pollachius	1	unknown	Mass	315	0.61		32.57	unknown		Bauchot R, Diagne M, Platel R, Ridet J-M, Bauchot M-L. in Fishbase. www.fishbase.org. date of access: Apr.-13-17
Gadiformes	Gadiformes	Gadidae	Pollachius	virens		Pollachius_virens	1	unknown	Mass	9397	2.449			unknown		Bauchot R, Diagne M, Platel R, Ridet J-M, Bauchot M-L. in Fishbase. www.fishbase.org. date of access: Apr.-13-17
Gadiformes	Gadiformes	Gadidae	Pollachius	virens		Pollachius_virens	1	unknown	Mass	1170	0.783			unknown		Nilsson GE et al. (2000) Proc. R. Soc. B 267:1335-1339	Oslo Fjord
Gadiformes	Gadiformes	Gadidae	Trisopterus	esmarkii		Trisopterus_esmarkii	1	unknown	Mass	16	0.147			unknown		Bauchot R, Diagne M, Platel R, Ridet J-M, Bauchot M-L. in Fishbase. www.fishbase.org. date of access: Apr.-13-17
Gadiformes	Gadiformes	Gadidae	Trisopterus	esmarkii		Trisopterus_esmarkii	1	unknown	Mass	20	0.21			unknown		Bauchot R, Diagne M, Platel R, Ridet J-M, Bauchot M-L. in Fishbase. www.fishbase.org. date of access: Apr.-13-17
Gadiformes	Gadiformes	Gadidae	Trisopterus	esmarkii		Trisopterus_esmarkii	1	unknown	Mass	50	0.286			unknown		Bauchot R, Diagne M, Platel R, Ridet J-M, Bauchot M-L. in Fishbase. www.fishbase.org. date of access: Apr.-13-17
Gadiformes	Gadiformes	Gadidae	Trisopterus	esmarkii		Trisopterus_esmarkii	1	unknown	Mass	80	0.27			unknown		Bauchot R, Diagne M, Platel R, Ridet J-M, Bauchot M-L. in Fishbase. www.fishbase.org. date of access: Apr.-13-17
Gadiformes	Gadiformes	Gadidae	Trisopterus	luscus		Trisopterus_luscus	1	unknown	Mass	109	0.344		20.65	Adult		Bauchot R, Diagne M, Platel R, Ridet J-M, Bauchot M-L. in Fishbase. www.fishbase.org. date of access: Apr.-13-17
Gadiformes	Gadiformes	Gadidae	Trisopterus	luscus		Trisopterus_luscus	1	unknown	Mass	111	0.36		20.77	Adult		Bauchot R, Diagne M, Platel R, Ridet J-M, Bauchot M-L. in Fishbase. www.fishbase.org. date of access: Apr.-13-17
Gadiformes	Gadiformes	Gadidae	Trisopterus	luscus		Trisopterus_luscus	1	unknown	Mass	127	0.402		21.68	Adult		Bauchot R, Diagne M, Platel R, Ridet J-M, Bauchot M-L. in Fishbase. www.fishbase.org. date of access: Apr.-13-17
Gadiformes	Gadiformes	Gadidae	Trisopterus	luscus		Trisopterus_luscus	1	unknown	Mass	148	0.365		22.76	Adult		Bauchot R, Diagne M, Platel R, Ridet J-M, Bauchot M-L. in Fishbase. www.fishbase.org. date of access: Apr.-13-17
Gadiformes	Gadiformes	Gadidae	Trisopterus	luscus		Trisopterus_luscus	1	unknown	Mass	148	0.367		22.76	Adult		Bauchot R, Diagne M, Platel R, Ridet J-M, Bauchot M-L. in Fishbase. www.fishbase.org. date of access: Apr.-13-17
Gadiformes	Gadiformes	Gadidae	Trisopterus	luscus		Trisopterus_luscus	1	unknown	Mass	173	0.444		23.92	Adult		Bauchot R, Diagne M, Platel R, Ridet J-M, Bauchot M-L. in Fishbase. www.fishbase.org. date of access: Apr.-13-17
Gadiformes	Gadiformes	Gadidae	Trisopterus	luscus		Trisopterus_luscus	1	unknown	Mass	173	0.465		23.92	Adult		Bauchot R, Diagne M, Platel R, Ridet J-M, Bauchot M-L. in Fishbase. www.fishbase.org. date of access: Apr.-13-17
Gadiformes	Gadiformes	Gadidae	Trisopterus	luscus		Trisopterus_luscus	1	unknown	Mass	206	0.484		25.29	Adult		Bauchot R, Diagne M, Platel R, Ridet J-M, Bauchot M-L. in Fishbase. www.fishbase.org. date of access: Apr.-13-17
Gadiformes	Gadiformes	Gadidae	Trisopterus	luscus		Trisopterus_luscus	1	unknown	Mass	207	0.425		25.33	Adult		Bauchot R, Diagne M, Platel R, Ridet J-M, Bauchot M-L. in Fishbase. www.fishbase.org. date of access: Apr.-13-17
Gadiformes	Gadiformes	Gadidae	Trisopterus	luscus		Trisopterus_luscus	1	unknown	Mass	317	0.571		29.01	Adult		Bauchot R, Diagne M, Platel R, Ridet J-M, Bauchot M-L. in Fishbase. www.fishbase.org. date of access: Apr.-13-17
Gadiformes	Gadiformes	Gadidae	Trisopterus	luscus		Trisopterus_luscus	1	unknown	Mass	380	0.655		30.74	Adult		Bauchot R, Diagne M, Platel R, Ridet J-M, Bauchot M-L. in Fishbase. www.fishbase.org. date of access: Apr.-13-17
Gadiformes	Gadiformes	Gadidae	Trisopterus	luscus		Trisopterus_luscus	1	unknown	Mass	879	1.253		40.15	Adult		Bauchot R, Diagne M, Platel R, Ridet J-M, Bauchot M-L. in Fishbase. www.fishbase.org. date of access: Apr.-13-17
Gadiformes	Gadiformes	Gadidae	Trisopterus	luscus		Trisopterus_luscus	1	unknown	Mass	1099	1.1995		43.11	Adult		Bauchot R, Diagne M, Platel R, Ridet J-M, Bauchot M-L. in Fishbase. www.fishbase.org. date of access: Apr.-13-17
Gadiformes	Gadiformes	Gadidae	Trisopterus	luscus		Trisopterus_luscus	1	unknown	Mass	3.7	0.05		7.03	unknown		Bauchot R, Diagne M, Platel R, Ridet J-M, Bauchot M-L. in Fishbase. www.fishbase.org. date of access: Apr.-13-17
Gadiformes	Gadiformes	Gadidae	Trisopterus	luscus		Trisopterus_luscus	1	unknown	Mass	4.3	0.053		7.38	unknown		Bauchot R, Diagne M, Platel R, Ridet J-M, Bauchot M-L. in Fishbase. www.fishbase.org. date of access: Apr.-13-17
Gadiformes	Gadiformes	Gadidae	Trisopterus	luscus		Trisopterus_luscus	1	unknown	Mass	5.3	0.0729		7.88	unknown		Bauchot R, Diagne M, Platel R, Ridet J-M, Bauchot M-L. in Fishbase. www.fishbase.org. date of access: Apr.-13-17
Gadiformes	Gadiformes	Gadidae	Trisopterus	luscus		Trisopterus_luscus	1	unknown	Mass	6.9	0.078		8.58	unknown		Bauchot R, Diagne M, Platel R, Ridet J-M, Bauchot M-L. in Fishbase. www.fishbase.org. date of access: Apr.-13-17
Gadiformes	Gadiformes	Gadidae	Trisopterus	luscus		Trisopterus_luscus	1	unknown	Mass	11.1	0.0971		9.98	unknown		Bauchot R, Diagne M, Platel R, Ridet J-M, Bauchot M-L. in Fishbase. www.fishbase.org. date of access: Apr.-13-17
Gadiformes	Gadiformes	Gadidae	Trisopterus	luscus		Trisopterus_luscus	1	unknown	Mass	12.2	0.107		10.28	unknown		Bauchot R, Diagne M, Platel R, Ridet J-M, Bauchot M-L. in Fishbase. www.fishbase.org. date of access: Apr.-13-17
Gadiformes	Gadiformes	Gadidae	Trisopterus	luscus		Trisopterus_luscus	1	unknown	Mass	21.7	0.155		12.35	unknown		Bauchot R, Diagne M, Platel R, Ridet J-M, Bauchot M-L. in Fishbase. www.fishbase.org. date of access: Apr.-13-17
Gadiformes	Gadiformes	Gadidae	Trisopterus	luscus		Trisopterus_luscus	1	unknown	Mass	24.5	0.135		12.84	unknown		Bauchot R, Diagne M, Platel R, Ridet J-M, Bauchot M-L. in Fishbase. www.fishbase.org. date of access: Apr.-13-17
Gadiformes	Gadiformes	Gadidae	Trisopterus	luscus		Trisopterus_luscus	1	unknown	Mass	33.2	0.175		14.14	unknown		Bauchot R, Diagne M, Platel R, Ridet J-M, Bauchot M-L. in Fishbase. www.fishbase.org. date of access: Apr.-13-17
Gadiformes	Gadiformes	Gadidae	Trisopterus	luscus		Trisopterus_luscus	1	unknown	Mass	41	0.17		15.13	unknown		Bauchot R, Diagne M, Platel R, Ridet J-M, Bauchot M-L. in Fishbase. www.fishbase.org. date of access: Apr.-13-17
Gadiformes	Gadiformes	Gadidae	Trisopterus	luscus		Trisopterus_luscus	1	unknown	Mass	44.5	0.175		15.53	unknown		Bauchot R, Diagne M, Platel R, Ridet J-M, Bauchot M-L. in Fishbase. www.fishbase.org. date of access: Apr.-13-17
Gadiformes	Gadiformes	Gadidae	Trisopterus	luscus		Trisopterus_luscus	1	unknown	Mass	54.5	0.26		16.56	unknown		Bauchot R, Diagne M, Platel R, Ridet J-M, Bauchot M-L. in Fishbase. www.fishbase.org. date of access: Apr.-13-17
Gadiformes	Gadiformes	Gadidae	Trisopterus	luscus		Trisopterus_luscus	1	unknown	Mass	57	0.195		16.8	unknown		Bauchot R, Diagne M, Platel R, Ridet J-M, Bauchot M-L. in Fishbase. www.fishbase.org. date of access: Apr.-13-17
Gadiformes	Gadiformes	Gadidae	Trisopterus	minutus		Trisopterus_minutus	1	unknown	Mass	29.5	0.182			unknown		Bauchot R, Diagne M, Platel R, Ridet J-M, Bauchot M-L. in Fishbase. www.fishbase.org. date of access: Apr.-13-17
Gadiformes	Gadiformes	Gadidae	Trisopterus	minutus		Trisopterus_minutus	1	unknown	Mass	37.8	0.21			unknown		Bauchot R, Diagne M, Platel R, Ridet J-M, Bauchot M-L. in Fishbase. www.fishbase.org. date of access: Apr.-13-17
Gadiformes	Gadiformes	Gadidae	Trisopterus	minutus		Trisopterus_minutus	1	unknown	Mass	80	0.361			unknown		Bauchot R, Diagne M, Platel R, Ridet J-M, Bauchot M-L. in Fishbase. www.fishbase.org. date of access: Apr.-13-17
Gadiformes	Gadiformes	Gadidae	Trisopterus	minutus		Trisopterus_minutus	1	unknown	Mass	140	0.454			unknown		Bauchot R, Diagne M, Platel R, Ridet J-M, Bauchot M-L. in Fishbase. www.fishbase.org. date of access: Apr.-13-17
Gadiformes	Gadiformes	Lotidae	Brosme	brosme		Brosme_brosme	1	unknown	Mass	250	0.361			unknown		Bauchot R, Diagne M, Platel R, Ridet J-M, Bauchot M-L. in Fishbase. www.fishbase.org. date of access: Apr.-13-17
Gadiformes	Gadiformes	Lotidae	Brosme	brosme		Brosme_brosme	1	unknown	Mass	599.8	0.6223			unknown		Bauchot R, Diagne M, Platel R, Ridet J-M, Bauchot M-L. in Fishbase. www.fishbase.org. date of access: Apr.-13-17
Gadiformes	Gadiformes	Lotidae	Brosme	brosme		Brosme_brosme	1	unknown	Mass	900	0.78			unknown		Bauchot R, Diagne M, Platel R, Ridet J-M, Bauchot M-L. in Fishbase. www.fishbase.org. date of access: Apr.-13-17
Gadiformes	Gadiformes	Lotidae	Ciliata	mustela		Ciliata_mustela	1	unknown	Mass	2.7	0.034			unknown		Bauchot R, Diagne M, Platel R, Ridet J-M, Bauchot M-L. in Fishbase. www.fishbase.org. date of access: Apr.-13-17
Gadiformes	Gadiformes	Lotidae	Ciliata	mustela		Ciliata_mustela	1	unknown	Mass	3.2	0.037			unknown		Bauchot R, Diagne M, Platel R, Ridet J-M, Bauchot M-L. in Fishbase. www.fishbase.org. date of access: Apr.-13-17
Gadiformes	Gadiformes	Lotidae	Ciliata	mustela		Ciliata_mustela	1	unknown	Mass	4.6	0.039			unknown		Bauchot R, Diagne M, Platel R, Ridet J-M, Bauchot M-L. in Fishbase. www.fishbase.org. date of access: Apr.-13-17
Gadiformes	Gadiformes	Lotidae	Ciliata	mustela		Ciliata_mustela	1	unknown	Mass	5.3	0.046			unknown		Bauchot R, Diagne M, Platel R, Ridet J-M, Bauchot M-L. in Fishbase. www.fishbase.org. date of access: Apr.-13-17
Gadiformes	Gadiformes	Lotidae	Ciliata	mustela		Ciliata_mustela	1	unknown	Mass	5.6	0.048			unknown		Bauchot R, Diagne M, Platel R, Ridet J-M, Bauchot M-L. in Fishbase. www.fishbase.org. date of access: Apr.-13-17
Gadiformes	Gadiformes	Lotidae	Ciliata	mustela		Ciliata_mustela	1	unknown	Mass	5.7	0.039			unknown		Bauchot R, Diagne M, Platel R, Ridet J-M, Bauchot M-L. in Fishbase. www.fishbase.org. date of access: Apr.-13-17
Gadiformes	Gadiformes	Lotidae	Ciliata	mustela		Ciliata_mustela	1	unknown	Mass	5.9	0.044			unknown		Bauchot R, Diagne M, Platel R, Ridet J-M, Bauchot M-L. in Fishbase. www.fishbase.org. date of access: Apr.-13-17
Gadiformes	Gadiformes	Lotidae	Ciliata	mustela		Ciliata_mustela	1	unknown	Mass	6	0.042			unknown		Bauchot R, Diagne M, Platel R, Ridet J-M, Bauchot M-L. in Fishbase. www.fishbase.org. date of access: Apr.-13-17
Gadiformes	Gadiformes	Lotidae	Ciliata	mustela		Ciliata_mustela	1	unknown	Mass	6.7	0.048			unknown		Bauchot R, Diagne M, Platel R, Ridet J-M, Bauchot M-L. in Fishbase. www.fishbase.org. date of access: Apr.-13-17
Gadiformes	Gadiformes	Lotidae	Ciliata	mustela		Ciliata_mustela	1	unknown	Mass	7	0.049			unknown		Bauchot R, Diagne M, Platel R, Ridet J-M, Bauchot M-L. in Fishbase. www.fishbase.org. date of access: Apr.-13-17
Gadiformes	Gadiformes	Lotidae	Ciliata	mustela		Ciliata_mustela	1	unknown	Mass	7	0.0511			unknown		Bauchot R, Diagne M, Platel R, Ridet J-M, Bauchot M-L. in Fishbase. www.fishbase.org. date of access: Apr.-13-17
Gadiformes	Gadiformes	Lotidae	Ciliata	mustela		Ciliata_mustela	1	unknown	Mass	8	0.047			unknown		Bauchot R, Diagne M, Platel R, Ridet J-M, Bauchot M-L. in Fishbase. www.fishbase.org. date of access: Apr.-13-17
Gadiformes	Gadiformes	Lotidae	Ciliata	mustela		Ciliata_mustela	1	unknown	Mass	8.1	0.049			unknown		Bauchot R, Diagne M, Platel R, Ridet J-M, Bauchot M-L. in Fishbase. www.fishbase.org. date of access: Apr.-13-17
Gadiformes	Gadiformes	Lotidae	Ciliata	mustela		Ciliata_mustela	1	unknown	Mass	8.4	0.0579			unknown		Bauchot R, Diagne M, Platel R, Ridet J-M, Bauchot M-L. in Fishbase. www.fishbase.org. date of access: Apr.-13-17
Gadiformes	Gadiformes	Lotidae	Ciliata	mustela		Ciliata_mustela	1	unknown	Mass	8.6	0.054			unknown		Bauchot R, Diagne M, Platel R, Ridet J-M, Bauchot M-L. in Fishbase. www.fishbase.org. date of access: Apr.-13-17
Gadiformes	Gadiformes	Lotidae	Ciliata	mustela		Ciliata_mustela	1	unknown	Mass	8.9	0.047			unknown		Bauchot R, Diagne M, Platel R, Ridet J-M, Bauchot M-L. in Fishbase. www.fishbase.org. date of access: Apr.-13-17
Gadiformes	Gadiformes	Lotidae	Ciliata	mustela		Ciliata_mustela	1	unknown	Mass	9.6	0.05			unknown		Bauchot R, Diagne M, Platel R, Ridet J-M, Bauchot M-L. in Fishbase. www.fishbase.org. date of access: Apr.-13-17
Gadiformes	Gadiformes	Lotidae	Ciliata	mustela		Ciliata_mustela	1	unknown	Mass	9.6	0.061			unknown		Bauchot R, Diagne M, Platel R, Ridet J-M, Bauchot M-L. in Fishbase. www.fishbase.org. date of access: Apr.-13-17
Gadiformes	Gadiformes	Lotidae	Ciliata	mustela		Ciliata_mustela	1	unknown	Mass	10.4	0.061			unknown		Bauchot R, Diagne M, Platel R, Ridet J-M, Bauchot M-L. in Fishbase. www.fishbase.org. date of access: Apr.-13-17
Gadiformes	Gadiformes	Lotidae	Ciliata	mustela		Ciliata_mustela	1	unknown	Mass	10.9	0.064			unknown		Bauchot R, Diagne M, Platel R, Ridet J-M, Bauchot M-L. in Fishbase. www.fishbase.org. date of access: Apr.-13-17
Gadiformes	Gadiformes	Lotidae	Ciliata	mustela		Ciliata_mustela	1	unknown	Mass	14.2	0.0681			unknown		Bauchot R, Diagne M, Platel R, Ridet J-M, Bauchot M-L. in Fishbase. www.fishbase.org. date of access: Apr.-13-17
Gadiformes	Gadiformes	Lotidae	Ciliata	mustela		Ciliata_mustela	1	unknown	Mass	14.4	0.065			unknown		Bauchot R, Diagne M, Platel R, Ridet J-M, Bauchot M-L. in Fishbase. www.fishbase.org. date of access: Apr.-13-17
Gadiformes	Gadiformes	Lotidae	Ciliata	mustela		Ciliata_mustela	1	unknown	Mass	14.5	0.0579			unknown		Bauchot R, Diagne M, Platel R, Ridet J-M, Bauchot M-L. in Fishbase. www.fishbase.org. date of access: Apr.-13-17
Gadiformes	Gadiformes	Lotidae	Ciliata	mustela		Ciliata_mustela	1	unknown	Mass	20.7	0.0959			unknown		Bauchot R, Diagne M, Platel R, Ridet J-M, Bauchot M-L. in Fishbase. www.fishbase.org. date of access: Apr.-13-17
Gadiformes	Gadiformes	Lotidae	Ciliata	mustela		Ciliata_mustela	1	unknown	Mass	39.9	0.122			unknown		Bauchot R, Diagne M, Platel R, Ridet J-M, Bauchot M-L. in Fishbase. www.fishbase.org. date of access: Apr.-13-17
Gadiformes	Gadiformes	Lotidae	Ciliata	mustela		Ciliata_mustela	1	unknown	Mass	9.84	0.055			unknown		Bauchot R, Diagne M, Platel R, Ridet J-M, Bauchot M-L. in Fishbase. www.fishbase.org. date of access: Apr.-13-17
Gadiformes	Gadiformes	Lotidae	Ciliata	septentrionalis		Ciliata_septentrionalis	1	unknown	Mass	10	0.0469			unknown		Bauchot R, Diagne M, Platel R, Ridet J-M, Bauchot M-L. in Fishbase. www.fishbase.org. date of access: Apr.-13-17
Gadiformes	Gadiformes	Lotidae	Enchelyopus	cimbrius		Enchelyopus_cimbrius	1	unknown	Mass	40	0.166			unknown		Bauchot R, Diagne M, Platel R, Ridet J-M, Bauchot M-L. in Fishbase. www.fishbase.org. date of access: Apr.-13-17
Gadiformes	Gadiformes	Lotidae	Enchelyopus	cimbrius		Enchelyopus_cimbrius	1	unknown	Mass	60	0.173			unknown		Bauchot R, Diagne M, Platel R, Ridet J-M, Bauchot M-L. in Fishbase. www.fishbase.org. date of access: Apr.-13-17
Gadiformes	Gadiformes	Lotidae	Gaidropsarus	argentatus		Gaidropsarus_argentatus	1	unknown	Mass	12	0.103			unknown		Bauchot R, Diagne M, Platel R, Ridet J-M, Bauchot M-L. in Fishbase. www.fishbase.org. date of access: Apr.-13-17
Gadiformes	Gadiformes	Lotidae	Gaidropsarus	argentatus		Gaidropsarus_argentatus	1	unknown	Mass	50	0.214			unknown		Bauchot R, Diagne M, Platel R, Ridet J-M, Bauchot M-L. in Fishbase. www.fishbase.org. date of access: Apr.-13-17
Gadiformes	Gadiformes	Lotidae	Gaidropsarus	argentatus		Gaidropsarus_argentatus	1	unknown	Mass	80	0.201			unknown		Bauchot R, Diagne M, Platel R, Ridet J-M, Bauchot M-L. in Fishbase. www.fishbase.org. date of access: Apr.-13-17
Gadiformes	Gadiformes	Lotidae	Gaidropsarus	ensis		Gaidropsarus_ensis	1	unknown	Mass	100	0.173			unknown		Bauchot R, Diagne M, Platel R, Ridet J-M, Bauchot M-L. in Fishbase. www.fishbase.org. date of access: Apr.-13-17
Gadiformes	Gadiformes	Lotidae	Gaidropsarus	ensis		Gaidropsarus_ensis	1	unknown	Mass	100	0.202			unknown		Bauchot R, Diagne M, Platel R, Ridet J-M, Bauchot M-L. in Fishbase. www.fishbase.org. date of access: Apr.-13-17
Gadiformes	Gadiformes	Lotidae	Gaidropsarus	mediterraneus		Gaidropsarus_mediterraneus	1	unknown	Mass	458	0.508			unknown		Bauchot R, Diagne M, Platel R, Ridet J-M, Bauchot M-L. in Fishbase. www.fishbase.org. date of access: Apr.-13-17
Gadiformes	Gadiformes	Lotidae	Molva	dypterygia		Molva_dypterygia	1	unknown	Mass	1500	1.102			unknown		Bauchot R, Diagne M, Platel R, Ridet J-M, Bauchot M-L. in Fishbase. www.fishbase.org. date of access: Apr.-13-17
Gadiformes	Gadiformes	Lotidae	Molva	dypterygia		Molva_dypterygia	1	unknown	Mass	2697.7	1.361			unknown		Bauchot R, Diagne M, Platel R, Ridet J-M, Bauchot M-L. in Fishbase. www.fishbase.org. date of access: Apr.-13-17
Gadiformes	Gadiformes	Lotidae	Molva	dypterygia		Molva_dypterygia	1	unknown	Mass	8995	2.307			unknown		Bauchot R, Diagne M, Platel R, Ridet J-M, Bauchot M-L. in Fishbase. www.fishbase.org. date of access: Apr.-13-17
Gadiformes	Gadiformes	Lotidae	Molva	macrophthalma		Molva_macrophthalma	1	unknown	Mass	7499	2.07			unknown		Bauchot R, Diagne M, Platel R, Ridet J-M, Bauchot M-L. in Fishbase. www.fishbase.org. date of access: Apr.-13-17
Gadiformes	Gadiformes	Lotidae	Molva	molva		Molva_molva	1	unknown	Mass	5724.68	1.659			unknown		Bauchot R, Diagne M, Platel R, Ridet J-M, Bauchot M-L. in Fishbase. www.fishbase.org. date of access: Apr.-13-17
Gadiformes	Gadiformes	Macrouridae	Coelorinchus	caelorhincus		Coelorinchus_caelorhincus	1	unknown	Mass	50	0.4276			unknown		Bauchot R, Diagne M, Platel R, Ridet J-M, Bauchot M-L. in Fishbase. www.fishbase.org. date of access: Apr.-13-17
Gadiformes	Gadiformes	Macrouridae	Coelorinchus	caelorhincus		Coelorinchus_caelorhincus	1	unknown	Mass	60	0.476			unknown		Bauchot R, Diagne M, Platel R, Ridet J-M, Bauchot M-L. in Fishbase. www.fishbase.org. date of access: Apr.-13-17
Gadiformes	Gadiformes	Macrouridae	Coelorinchus	caelorhincus		Coelorinchus_caelorhincus	1	unknown	Mass	83.9	0.251			unknown		Bauchot R, Diagne M, Platel R, Ridet J-M, Bauchot M-L. in Fishbase. www.fishbase.org. date of access: Apr.-13-17
Gadiformes	Gadiformes	Macrouridae	Coelorinchus	caelorhincus		Coelorinchus_caelorhincus	1	unknown	Mass	163	0.3251			unknown		Bauchot R, Diagne M, Platel R, Ridet J-M, Bauchot M-L. in Fishbase. www.fishbase.org. date of access: Apr.-13-17
Gadiformes	Gadiformes	Macrouridae	Coelorinchus	caelorhincus		Coelorinchus_caelorhincus	1	unknown	Mass	167	0.182			unknown		Bauchot R, Diagne M, Platel R, Ridet J-M, Bauchot M-L. in Fishbase. www.fishbase.org. date of access: Apr.-13-17
Gadiformes	Gadiformes	Macrouridae	Coelorinchus	caelorhincus		Coelorinchus_caelorhincus	1	unknown	Mass	200	0.492			unknown		Bauchot R, Diagne M, Platel R, Ridet J-M, Bauchot M-L. in Fishbase. www.fishbase.org. date of access: Apr.-13-17
Gadiformes	Gadiformes	Macrouridae	Coryphaenoides	rupestris		Coryphaenoides_rupestris	1	unknown	Mass	1199.5	1.043			unknown		Bauchot R, Diagne M, Platel R, Ridet J-M, Bauchot M-L. in Fishbase. www.fishbase.org. date of access: Apr.-13-17
Gadiformes	Gadiformes	Macrouridae	Coryphaenoides	rupestris		Coryphaenoides_rupestris	1	unknown	Mass	200	0.422			unknown		Bauchot R, Diagne M, Platel R, Ridet J-M, Bauchot M-L. in Fishbase. www.fishbase.org. date of access: Apr.-13-17
Gadiformes	Gadiformes	Macrouridae	Coryphaenoides	rupestris		Coryphaenoides_rupestris	1	unknown	Mass	279.9	0.437			unknown		Bauchot R, Diagne M, Platel R, Ridet J-M, Bauchot M-L. in Fishbase. www.fishbase.org. date of access: Apr.-13-17
Gadiformes	Gadiformes	Macrouridae	Coryphaenoides	rupestris		Coryphaenoides_rupestris	1	unknown	Mass	299.9	0.469			unknown		Bauchot R, Diagne M, Platel R, Ridet J-M, Bauchot M-L. in Fishbase. www.fishbase.org. date of access: Apr.-13-17
Gadiformes	Gadiformes	Macrouridae	Coryphaenoides	rupestris		Coryphaenoides_rupestris	1	unknown	Mass	530	0.583			unknown		Bauchot R, Diagne M, Platel R, Ridet J-M, Bauchot M-L. in Fishbase. www.fishbase.org. date of access: Apr.-13-17
Gadiformes	Gadiformes	Macrouridae	Coryphaenoides	rupestris		Coryphaenoides_rupestris	1	unknown	Mass	599.8	0.664			unknown		Bauchot R, Diagne M, Platel R, Ridet J-M, Bauchot M-L. in Fishbase. www.fishbase.org. date of access: Apr.-13-17
Gadiformes	Gadiformes	Macrouridae	Coryphaenoides	rupestris		Coryphaenoides_rupestris	1	unknown	Mass	599.8	0.6855			unknown		Bauchot R, Diagne M, Platel R, Ridet J-M, Bauchot M-L. in Fishbase. www.fishbase.org. date of access: Apr.-13-17
Gadiformes	Gadiformes	Macrouridae	Coryphaenoides	rupestris		Coryphaenoides_rupestris	1	unknown	Mass	740	0.603			unknown		Bauchot R, Diagne M, Platel R, Ridet J-M, Bauchot M-L. in Fishbase. www.fishbase.org. date of access: Apr.-13-17
Gadiformes	Gadiformes	Macrouridae	Coryphaenoides	rupestris		Coryphaenoides_rupestris	1	unknown	Mass	934	0.765			unknown		Bauchot R, Diagne M, Platel R, Ridet J-M, Bauchot M-L. in Fishbase. www.fishbase.org. date of access: Apr.-13-17
Gadiformes	Gadiformes	Macrouridae	Coryphaenoides	rupestris		Coryphaenoides_rupestris	1	unknown	Mass	982	0.9			unknown		Bauchot R, Diagne M, Platel R, Ridet J-M, Bauchot M-L. in Fishbase. www.fishbase.org. date of access: Apr.-13-17
Gadiformes	Gadiformes	Macrouridae	Coryphaenoides	rupestris		Coryphaenoides_rupestris	1	unknown	Mass	1099	0.204			unknown		Bauchot R, Diagne M, Platel R, Ridet J-M, Bauchot M-L. in Fishbase. www.fishbase.org. date of access: Apr.-13-17
Gadiformes	Gadiformes	Macrouridae	Coryphaenoides	rupestris		Coryphaenoides_rupestris	1	unknown	Mass	1200	0.948			unknown		Bauchot R, Diagne M, Platel R, Ridet J-M, Bauchot M-L. in Fishbase. www.fishbase.org. date of access: Apr.-13-17
Gadiformes	Gadiformes	Macrouridae	Coryphaenoides	rupestris		Coryphaenoides_rupestris	1	unknown	Mass	1200	1.138			unknown		Bauchot R, Diagne M, Platel R, Ridet J-M, Bauchot M-L. in Fishbase. www.fishbase.org. date of access: Apr.-13-17
Gadiformes	Gadiformes	Macrouridae	Coryphaenoides	rupestris		Coryphaenoides_rupestris	1	unknown	Mass	721.89	0.651			unknown		Bauchot R, Diagne M, Platel R, Ridet J-M, Bauchot M-L. in Fishbase. www.fishbase.org. date of access: Apr.-13-17
Gadiformes	Gadiformes	Macrouridae	Macrourus	berglax		Macrourus_berglax	1	unknown	Mass	1500	1.432		54.9	Adult		Bauchot R, Diagne M, Platel R, Ridet J-M, Bauchot M-L. in Fishbase. www.fishbase.org. date of access: Apr.-13-17
Gadiformes	Gadiformes	Macrouridae	Macrourus	berglax		Macrourus_berglax	1	unknown	Mass	299.9	0.565		31.69	unknown		Bauchot R, Diagne M, Platel R, Ridet J-M, Bauchot M-L. in Fishbase. www.fishbase.org. date of access: Apr.-13-17
Gadiformes	Gadiformes	Macrouridae	Macrourus	berglax		Macrourus_berglax	1	unknown	Mass	115	0.402		22.85	unknown		Bauchot R, Diagne M, Platel R, Ridet J-M, Bauchot M-L. in Fishbase. www.fishbase.org. date of access: Apr.-13-17
Gadiformes	Gadiformes	Macrouridae	Macrourus	berglax		Macrourus_berglax	1	unknown	Mass	830	1.409		44.86	unknown		Bauchot R, Diagne M, Platel R, Ridet J-M, Bauchot M-L. in Fishbase. www.fishbase.org. date of access: Apr.-13-17
Gadiformes	Gadiformes	Macrouridae	Macrourus	berglax		Macrourus_berglax	1	unknown	Mass	875	0.986		45.67	unknown		Bauchot R, Diagne M, Platel R, Ridet J-M, Bauchot M-L. in Fishbase. www.fishbase.org. date of access: Apr.-13-17
Gadiformes	Gadiformes	Macrouridae	Macrourus	berglax		Macrourus_berglax	1	unknown	Mass	1026	1.191		48.22	unknown		Bauchot R, Diagne M, Platel R, Ridet J-M, Bauchot M-L. in Fishbase. www.fishbase.org. date of access: Apr.-13-17
Gadiformes	Gadiformes	Macrouridae	Malacocephalus	laevis		Malacocephalus_laevis	1	unknown	Mass	70	0.27			unknown		Bauchot R, Diagne M, Platel R, Ridet J-M, Bauchot M-L. in Fishbase. www.fishbase.org. date of access: Apr.-13-17
Gadiformes	Gadiformes	Macrouridae	Malacocephalus	laevis		Malacocephalus_laevis	1	unknown	Mass	130	0.365			unknown		Bauchot R, Diagne M, Platel R, Ridet J-M, Bauchot M-L. in Fishbase. www.fishbase.org. date of access: Apr.-13-17
Gadiformes	Gadiformes	Macrouridae	Malacocephalus	laevis		Malacocephalus_laevis	1	unknown	Mass	185	0.409			unknown		Bauchot R, Diagne M, Platel R, Ridet J-M, Bauchot M-L. in Fishbase. www.fishbase.org. date of access: Apr.-13-17
Gadiformes	Gadiformes	Macrouridae	Malacocephalus	laevis		Malacocephalus_laevis	1	unknown	Mass	250	0.43			unknown		Bauchot R, Diagne M, Platel R, Ridet J-M, Bauchot M-L. in Fishbase. www.fishbase.org. date of access: Apr.-13-17
Gadiformes	Gadiformes	Macrouridae	Malacocephalus	laevis		Malacocephalus_laevis	1	unknown	Mass	255	0.56			unknown		Bauchot R, Diagne M, Platel R, Ridet J-M, Bauchot M-L. in Fishbase. www.fishbase.org. date of access: Apr.-13-17
Gadiformes	Gadiformes	Macrouridae	Malacocephalus	laevis		Malacocephalus_laevis	1	unknown	Mass	374	0.646			unknown		Bauchot R, Diagne M, Platel R, Ridet J-M, Bauchot M-L. in Fishbase. www.fishbase.org. date of access: Apr.-13-17
Gadiformes	Gadiformes	Macrouridae	Nezumia	aequalis		Nezumia_aequalis	1	unknown	Mass	6	0.0607			unknown		Bauchot R, Diagne M, Platel R, Ridet J-M, Bauchot M-L. in Fishbase. www.fishbase.org. date of access: Apr.-13-17
Gadiformes	Gadiformes	Macrouridae	Nezumia	aequalis		Nezumia_aequalis	1	unknown	Mass	19	0.106			unknown		Bauchot R, Diagne M, Platel R, Ridet J-M, Bauchot M-L. in Fishbase. www.fishbase.org. date of access: Apr.-13-17
Gadiformes	Gadiformes	Macrouridae	Nezumia	aequalis		Nezumia_aequalis	1	unknown	Mass	75	0.195			unknown		Bauchot R, Diagne M, Platel R, Ridet J-M, Bauchot M-L. in Fishbase. www.fishbase.org. date of access: Apr.-13-17
Gadiformes	Gadiformes	Macrouridae	Trachyrincus	scabrus		Trachyrincus_scabrus	1	unknown	Mass	330.4	0.395			unknown		Bauchot R, Diagne M, Platel R, Ridet J-M, Bauchot M-L. in Fishbase. www.fishbase.org. date of access: Apr.-13-17
Gadiformes	Gadiformes	Macrouridae	Trachyrincus	scabrus		Trachyrincus_scabrus	1	unknown	Mass	345	0.387			unknown		Bauchot R, Diagne M, Platel R, Ridet J-M, Bauchot M-L. in Fishbase. www.fishbase.org. date of access: Apr.-13-17
Gadiformes	Gadiformes	Macrouridae	Trachyrincus	scabrus		Trachyrincus_scabrus	1	unknown	Mass	475	0.395			unknown		Bauchot R, Diagne M, Platel R, Ridet J-M, Bauchot M-L. in Fishbase. www.fishbase.org. date of access: Apr.-13-17
Gadiformes	Gadiformes	Macrouridae	Trachyrincus	scabrus		Trachyrincus_scabrus	1	unknown	Mass	630	0.481			unknown		Bauchot R, Diagne M, Platel R, Ridet J-M, Bauchot M-L. in Fishbase. www.fishbase.org. date of access: Apr.-13-17
Gadiformes	Gadiformes	Merlucciidae	Merluccius	merluccius		Merluccius_merluccius	1	unknown	Mass	2999.2	0.9931			unknown		Bauchot R, Diagne M, Platel R, Ridet J-M, Bauchot M-L. in Fishbase. www.fishbase.org. date of access: Apr.-13-17
Gadiformes	Gadiformes	Merlucciidae	Merluccius	merluccius		Merluccius_merluccius	1	unknown	Mass	3500	0.847			unknown		Bauchot R, Diagne M, Platel R, Ridet J-M, Bauchot M-L. in Fishbase. www.fishbase.org. date of access: Apr.-13-17
Gadiformes	Gadiformes	Merlucciidae	Merluccius	merluccius		Merluccius_merluccius	1	unknown	Mass	7195	1.202			unknown		Bauchot R, Diagne M, Platel R, Ridet J-M, Bauchot M-L. in Fishbase. www.fishbase.org. date of access: Apr.-13-17
Gadiformes	Gadiformes	Merlucciidae	Merluccius	merluccius		Merluccius_merluccius	1	unknown	Mass	10000	1.409			unknown		Bauchot R, Diagne M, Platel R, Ridet J-M, Bauchot M-L. in Fishbase. www.fishbase.org. date of access: Apr.-13-17
Gadiformes	Gadiformes	Moridae	Halargyreus	johnsonii		Halargyreus_johnsonii	1	unknown	Mass	6	0.0622			unknown		Bauchot R, Diagne M, Platel R, Ridet J-M, Bauchot M-L. in Fishbase. www.fishbase.org. date of access: Apr.-13-17
Gadiformes	Gadiformes	Moridae	Halargyreus	johnsonii		Halargyreus_johnsonii	1	unknown	Mass	6	0.0617			unknown		Bauchot R, Diagne M, Platel R, Ridet J-M, Bauchot M-L. in Fishbase. www.fishbase.org. date of access: Apr.-13-17
Gadiformes	Gadiformes	Moridae	Halargyreus	johnsonii		Halargyreus_johnsonii	1	unknown	Mass	10	0.104			unknown		Bauchot R, Diagne M, Platel R, Ridet J-M, Bauchot M-L. in Fishbase. www.fishbase.org. date of access: Apr.-13-17
Gadiformes	Gadiformes	Moridae	Halargyreus	johnsonii		Halargyreus_johnsonii	1	unknown	Mass	22	0.13			unknown		Bauchot R, Diagne M, Platel R, Ridet J-M, Bauchot M-L. in Fishbase. www.fishbase.org. date of access: Apr.-13-17
Gadiformes	Gadiformes	Moridae	Halargyreus	johnsonii		Halargyreus_johnsonii	1	unknown	Mass	26	0.1439			unknown		Bauchot R, Diagne M, Platel R, Ridet J-M, Bauchot M-L. in Fishbase. www.fishbase.org. date of access: Apr.-13-17
Gadiformes	Gadiformes	Moridae	Halargyreus	johnsonii		Halargyreus_johnsonii	1	unknown	Mass	26	0.124			unknown		Bauchot R, Diagne M, Platel R, Ridet J-M, Bauchot M-L. in Fishbase. www.fishbase.org. date of access: Apr.-13-17
Gadiformes	Gadiformes	Moridae	Halargyreus	johnsonii		Halargyreus_johnsonii	1	unknown	Mass	28	0.1439			unknown		Bauchot R, Diagne M, Platel R, Ridet J-M, Bauchot M-L. in Fishbase. www.fishbase.org. date of access: Apr.-13-17
Gadiformes	Gadiformes	Moridae	Halargyreus	johnsonii		Halargyreus_johnsonii	1	unknown	Mass	30	0.147			unknown		Bauchot R, Diagne M, Platel R, Ridet J-M, Bauchot M-L. in Fishbase. www.fishbase.org. date of access: Apr.-13-17
Gadiformes	Gadiformes	Moridae	Halargyreus	johnsonii		Halargyreus_johnsonii	1	unknown	Mass	30	0.165			unknown		Bauchot R, Diagne M, Platel R, Ridet J-M, Bauchot M-L. in Fishbase. www.fishbase.org. date of access: Apr.-13-17
Gadiformes	Gadiformes	Moridae	Halargyreus	johnsonii		Halargyreus_johnsonii	1	unknown	Mass	35	0.171			unknown		Bauchot R, Diagne M, Platel R, Ridet J-M, Bauchot M-L. in Fishbase. www.fishbase.org. date of access: Apr.-13-17
Gadiformes	Gadiformes	Moridae	Halargyreus	johnsonii		Halargyreus_johnsonii	1	unknown	Mass	36	0.1589			unknown		Bauchot R, Diagne M, Platel R, Ridet J-M, Bauchot M-L. in Fishbase. www.fishbase.org. date of access: Apr.-13-17
Gadiformes	Gadiformes	Moridae	Halargyreus	johnsonii		Halargyreus_johnsonii	1	unknown	Mass	42	0.197			unknown		Bauchot R, Diagne M, Platel R, Ridet J-M, Bauchot M-L. in Fishbase. www.fishbase.org. date of access: Apr.-13-17
Gadiformes	Gadiformes	Moridae	Halargyreus	johnsonii		Halargyreus_johnsonii	1	unknown	Mass	45	0.179			unknown		Bauchot R, Diagne M, Platel R, Ridet J-M, Bauchot M-L. in Fishbase. www.fishbase.org. date of access: Apr.-13-17
Gadiformes	Gadiformes	Moridae	Halargyreus	johnsonii		Halargyreus_johnsonii	1	unknown	Mass	66.1	0.167			unknown		Bauchot R, Diagne M, Platel R, Ridet J-M, Bauchot M-L. in Fishbase. www.fishbase.org. date of access: Apr.-13-17
Gadiformes	Gadiformes	Moridae	Halargyreus	johnsonii		Halargyreus_johnsonii	1	unknown	Mass	100	0.248			unknown		Bauchot R, Diagne M, Platel R, Ridet J-M, Bauchot M-L. in Fishbase. www.fishbase.org. date of access: Apr.-13-17
Gadiformes	Gadiformes	Moridae	Lepidion	eques		Lepidion_eques	1	unknown	Mass	196	0.429		32.2	Adult		Bauchot R, Diagne M, Platel R, Ridet J-M, Bauchot M-L. in Fishbase. www.fishbase.org. date of access: Apr.-13-17
Gadiformes	Gadiformes	Moridae	Lepidion	eques		Lepidion_eques	1	unknown	Mass	310	0.492		36.66	Adult		Bauchot R, Diagne M, Platel R, Ridet J-M, Bauchot M-L. in Fishbase. www.fishbase.org. date of access: Apr.-13-17
Gadiformes	Gadiformes	Moridae	Lepidion	eques		Lepidion_eques	1	unknown	Mass	400	0.6776		39.39	Adult		Bauchot R, Diagne M, Platel R, Ridet J-M, Bauchot M-L. in Fishbase. www.fishbase.org. date of access: Apr.-13-17
Gadiformes	Gadiformes	Moridae	Lepidion	eques		Lepidion_eques	1	unknown	Mass	80	0.299		25	unknown		Bauchot R, Diagne M, Platel R, Ridet J-M, Bauchot M-L. in Fishbase. www.fishbase.org. date of access: Apr.-13-17
Gadiformes	Gadiformes	Moridae	Lepidion	eques		Lepidion_eques	1	unknown	Mass	80	0.312		25	unknown		Bauchot R, Diagne M, Platel R, Ridet J-M, Bauchot M-L. in Fishbase. www.fishbase.org. date of access: Apr.-13-17
Gadiformes	Gadiformes	Moridae	Lepidion	eques		Lepidion_eques	1	unknown	Mass	92.9	0.364		26.08	unknown		Bauchot R, Diagne M, Platel R, Ridet J-M, Bauchot M-L. in Fishbase. www.fishbase.org. date of access: Apr.-13-17
Gadiformes	Gadiformes	Moridae	Mora	moro		Mora_moro	1	unknown	Mass	1799	0.793			unknown		Bauchot R, Diagne M, Platel R, Ridet J-M, Bauchot M-L. in Fishbase. www.fishbase.org. date of access: Apr.-13-17
Gadiformes	Gadiformes	Moridae	Mora	moro		Mora_moro	1	unknown	Mass	2350	1.045			unknown		Bauchot R, Diagne M, Platel R, Ridet J-M, Bauchot M-L. in Fishbase. www.fishbase.org. date of access: Apr.-13-17
Gadiformes	Gadiformes	Muraenolepididae	Muraenolepis	marmorata		Muraenolepis_marmorata	1	unknown	Mass	109.9	0.323			unknown		Bauchot R, Diagne M, Platel R, Ridet J-M, Bauchot M-L. in Fishbase. www.fishbase.org. date of access: Apr.-13-17
Gadiformes	Gadiformes	Phycidae	Phycis	blennoides		Phycis_blennoides	1	unknown	Mass	110	0.354			unknown		Bauchot R, Diagne M, Platel R, Ridet J-M, Bauchot M-L. in Fishbase. www.fishbase.org. date of access: Apr.-13-17
Gadiformes	Gadiformes	Phycidae	Phycis	blennoides		Phycis_blennoides	1	unknown	Mass	650	0.736			unknown		Bauchot R, Diagne M, Platel R, Ridet J-M, Bauchot M-L. in Fishbase. www.fishbase.org. date of access: Apr.-13-17
Gadiformes	Gadiformes	Phycidae	Phycis	blennoides		Phycis_blennoides	1	unknown	Mass	840	0.822			unknown		Bauchot R, Diagne M, Platel R, Ridet J-M, Bauchot M-L. in Fishbase. www.fishbase.org. date of access: Apr.-13-17
Gadiformes	Gadiformes	Phycidae	Phycis	blennoides		Phycis_blennoides	1	unknown	Mass	1200	0.984			unknown		Bauchot R, Diagne M, Platel R, Ridet J-M, Bauchot M-L. in Fishbase. www.fishbase.org. date of access: Apr.-13-17
Gadiformes	Gadiformes	Phycidae	Phycis	blennoides		Phycis_blennoides	1	unknown	Mass	1250	0.8241			unknown		Bauchot R, Diagne M, Platel R, Ridet J-M, Bauchot M-L. in Fishbase. www.fishbase.org. date of access: Apr.-13-17
Gadiformes	Gadiformes	Phycidae	Phycis	blennoides		Phycis_blennoides	1	unknown	Mass	2697.7	1.167			unknown		Bauchot R, Diagne M, Platel R, Ridet J-M, Bauchot M-L. in Fishbase. www.fishbase.org. date of access: Apr.-13-17
Gadiformes	Gadiformes	Phycidae	Phycis	blennoides		Phycis_blennoides	1	unknown	Mass	5997.9	1.514			unknown		Bauchot R, Diagne M, Platel R, Ridet J-M, Bauchot M-L. in Fishbase. www.fishbase.org. date of access: Apr.-13-17
Gasterosteiformes	Gasterosteiformes	Gasterosteidae	Gasterosteus	aculeatus		Gasterosteus_aculeatus	1	unknown	Mass	1.5	0.019	5.1	5.8	Adult		Bauchot R, Diagne M, Platel R, Ridet J-M, Bauchot M-L. in Fishbase. www.fishbase.org. date of access: Apr.-13-17
Gasterosteiformes	Gasterosteiformes	Gasterosteidae	Gasterosteus	aculeatus		Gasterosteus_aculeatus	1	unknown	Mass	5.5	0.04		7.8	Adult		Bauchot R, Diagne M, Platel R, Ridet J-M, Bauchot M-L. in Fishbase. www.fishbase.org. date of access: Apr.-13-17
Gasterosteiformes	Gasterosteiformes	Gasterosteidae	Gasterosteus	aculeatus		Gasterosteus_aculeatus	1	unknown	Mass	2	0.0245		5.61	Adult		Bauchot R, Diagne M, Platel R, Ridet J-M, Bauchot M-L. in Fishbase. www.fishbase.org. date of access: Apr.-13-17
Gasterosteiformes	Gasterosteiformes	Gasterosteidae	Gasterosteus	aculeatus		Gasterosteus_aculeatus	1	unknown	Mass	2	0.0208		5.61	Adult		Bauchot R, Diagne M, Platel R, Ridet J-M, Bauchot M-L. in Fishbase. www.fishbase.org. date of access: Apr.-13-17
Gasterosteiformes	Gasterosteiformes	Gasterosteidae	Gasterosteus	aculeatus		Gasterosteus_aculeatus	1	unknown	Mass	2.1	0.023		5.7	Adult		Bauchot R, Diagne M, Platel R, Ridet J-M, Bauchot M-L. in Fishbase. www.fishbase.org. date of access: Apr.-13-17
Gasterosteiformes	Gasterosteiformes	Gasterosteidae	Gasterosteus	aculeatus		Gasterosteus_aculeatus	1	unknown	Mass	2.1	0.0242		5.7	Adult		Bauchot R, Diagne M, Platel R, Ridet J-M, Bauchot M-L. in Fishbase. www.fishbase.org. date of access: Apr.-13-17
Gasterosteiformes	Gasterosteiformes	Gasterosteidae	Gasterosteus	aculeatus		Gasterosteus_aculeatus	1	unknown	Mass	2.2	0.0243		5.78	Adult		Bauchot R, Diagne M, Platel R, Ridet J-M, Bauchot M-L. in Fishbase. www.fishbase.org. date of access: Apr.-13-17
Gasterosteiformes	Gasterosteiformes	Gasterosteidae	Gasterosteus	aculeatus		Gasterosteus_aculeatus	1	unknown	Mass	2.4	0.026		5.94	Adult		Bauchot R, Diagne M, Platel R, Ridet J-M, Bauchot M-L. in Fishbase. www.fishbase.org. date of access: Apr.-13-17
Gasterosteiformes	Gasterosteiformes	Gasterosteidae	Gasterosteus	aculeatus		Gasterosteus_aculeatus	1	unknown	Mass	3.4	0.0295		6.64	Adult		Bauchot R, Diagne M, Platel R, Ridet J-M, Bauchot M-L. in Fishbase. www.fishbase.org. date of access: Apr.-13-17
Gasterosteiformes	Gasterosteiformes	Gasterosteidae	Gasterosteus	aculeatus		Gasterosteus_aculeatus	1	unknown	Mass	0.8	0.0147		4.19	unknown		Bauchot R, Diagne M, Platel R, Ridet J-M, Bauchot M-L. in Fishbase. www.fishbase.org. date of access: Apr.-13-17
Gasterosteiformes	Gasterosteiformes	Gasterosteidae	Gasterosteus	aculeatus		Gasterosteus_aculeatus	1	unknown	Mass	0.9	0.0207		4.35	unknown		Bauchot R, Diagne M, Platel R, Ridet J-M, Bauchot M-L. in Fishbase. www.fishbase.org. date of access: Apr.-13-17
Gasterosteiformes	Gasterosteiformes	Gasterosteidae	Gasterosteus	aculeatus		Gasterosteus_aculeatus	1	unknown	Mass	1	0.0156		4.5	unknown		Bauchot R, Diagne M, Platel R, Ridet J-M, Bauchot M-L. in Fishbase. www.fishbase.org. date of access: Apr.-13-17
Gasterosteiformes	Gasterosteiformes	Gasterosteidae	Gasterosteus	aculeatus		Gasterosteus_aculeatus	1	unknown	Mass	1	0.0167		4.5	unknown		Bauchot R, Diagne M, Platel R, Ridet J-M, Bauchot M-L. in Fishbase. www.fishbase.org. date of access: Apr.-13-17
Gasterosteiformes	Gasterosteiformes	Gasterosteidae	Gasterosteus	aculeatus		Gasterosteus_aculeatus	1	unknown	Mass	1	0.0193		4.5	unknown		Bauchot R, Diagne M, Platel R, Ridet J-M, Bauchot M-L. in Fishbase. www.fishbase.org. date of access: Apr.-13-17
Gasterosteiformes	Gasterosteiformes	Gasterosteidae	Gasterosteus	aculeatus		Gasterosteus_aculeatus	1	unknown	Mass	1.1	0.017		4.64	unknown		Bauchot R, Diagne M, Platel R, Ridet J-M, Bauchot M-L. in Fishbase. www.fishbase.org. date of access: Apr.-13-17
Gasterosteiformes	Gasterosteiformes	Gasterosteidae	Gasterosteus	aculeatus		Gasterosteus_aculeatus	1	unknown	Mass	1.1	0.0192		4.64	unknown		Bauchot R, Diagne M, Platel R, Ridet J-M, Bauchot M-L. in Fishbase. www.fishbase.org. date of access: Apr.-13-17
Gasterosteiformes	Gasterosteiformes	Gasterosteidae	Gasterosteus	aculeatus		Gasterosteus_aculeatus	1	unknown	Mass	1.1	0.0203		4.64	unknown		Bauchot R, Diagne M, Platel R, Ridet J-M, Bauchot M-L. in Fishbase. www.fishbase.org. date of access: Apr.-13-17
Gasterosteiformes	Gasterosteiformes	Gasterosteidae	Gasterosteus	aculeatus		Gasterosteus_aculeatus	1	unknown	Mass	1.2	0.0204		4.77	unknown		Bauchot R, Diagne M, Platel R, Ridet J-M, Bauchot M-L. in Fishbase. www.fishbase.org. date of access: Apr.-13-17
Gasterosteiformes	Gasterosteiformes	Gasterosteidae	Gasterosteus	aculeatus		Gasterosteus_aculeatus	1	unknown	Mass	1.2	0.0205		4.77	unknown		Bauchot R, Diagne M, Platel R, Ridet J-M, Bauchot M-L. in Fishbase. www.fishbase.org. date of access: Apr.-13-17
Gasterosteiformes	Gasterosteiformes	Gasterosteidae	Gasterosteus	aculeatus		Gasterosteus_aculeatus	1	unknown	Mass	1.3	0.0213		4.89	unknown		Bauchot R, Diagne M, Platel R, Ridet J-M, Bauchot M-L. in Fishbase. www.fishbase.org. date of access: Apr.-13-17
Gasterosteiformes	Gasterosteiformes	Gasterosteidae	Gasterosteus	aculeatus		Gasterosteus_aculeatus	1	unknown	Mass	1.4	0.0185		5.01	unknown		Bauchot R, Diagne M, Platel R, Ridet J-M, Bauchot M-L. in Fishbase. www.fishbase.org. date of access: Apr.-13-17
Gasterosteiformes	Gasterosteiformes	Gasterosteidae	Gasterosteus	aculeatus		Gasterosteus_aculeatus	1	unknown	Mass	1.5	0.0221		5.12	unknown		Bauchot R, Diagne M, Platel R, Ridet J-M, Bauchot M-L. in Fishbase. www.fishbase.org. date of access: Apr.-13-17
Gasterosteiformes	Gasterosteiformes	Gasterosteidae	Gasterosteus	aculeatus		Gasterosteus_aculeatus	1	unknown	Mass	1.5	0.0212		5.12	unknown		Bauchot R, Diagne M, Platel R, Ridet J-M, Bauchot M-L. in Fishbase. www.fishbase.org. date of access: Apr.-13-17
Gasterosteiformes	Gasterosteiformes	Gasterosteidae	Gasterosteus	aculeatus		Gasterosteus_aculeatus	1	unknown	Mass	1.5	0.021		5.12	unknown		Bauchot R, Diagne M, Platel R, Ridet J-M, Bauchot M-L. in Fishbase. www.fishbase.org. date of access: Apr.-13-17
Gasterosteiformes	Gasterosteiformes	Gasterosteidae	Gasterosteus	aculeatus		Gasterosteus_aculeatus	1	unknown	Mass	1.5	0.0177		5.12	unknown		Bauchot R, Diagne M, Platel R, Ridet J-M, Bauchot M-L. in Fishbase. www.fishbase.org. date of access: Apr.-13-17
Gasterosteiformes	Gasterosteiformes	Gasterosteidae	Gasterosteus	aculeatus		Gasterosteus_aculeatus	1	unknown	Mass	1.6	0.0253		5.22	unknown		Bauchot R, Diagne M, Platel R, Ridet J-M, Bauchot M-L. in Fishbase. www.fishbase.org. date of access: Apr.-13-17
Gasterosteiformes	Gasterosteiformes	Gasterosteidae	Gasterosteus	aculeatus		Gasterosteus_aculeatus	1	unknown	Mass	1.7	0.022		5.33	unknown		Bauchot R, Diagne M, Platel R, Ridet J-M, Bauchot M-L. in Fishbase. www.fishbase.org. date of access: Apr.-13-17
Gasterosteiformes	Gasterosteiformes	Gasterosteidae	Gasterosteus	aculeatus		Gasterosteus_aculeatus	1	unknown	Mass	1.8	0.024		5.42	unknown		Bauchot R, Diagne M, Platel R, Ridet J-M, Bauchot M-L. in Fishbase. www.fishbase.org. date of access: Apr.-13-17
Gasterosteiformes	Gasterosteiformes	Gasterosteidae	Gasterosteus	aculeatus		Gasterosteus_aculeatus	1	unknown	Mass	1.8	0.021		5.42	unknown		Bauchot R, Diagne M, Platel R, Ridet J-M, Bauchot M-L. in Fishbase. www.fishbase.org. date of access: Apr.-13-17
Gasterosteiformes	Gasterosteiformes	Gasterosteidae	Gasterosteus	aculeatus		Gasterosteus_aculeatus	1	unknown	Mass	1.8	0.022		5.42	unknown		Bauchot R, Diagne M, Platel R, Ridet J-M, Bauchot M-L. in Fishbase. www.fishbase.org. date of access: Apr.-13-17
Gasterosteiformes	Gasterosteiformes	Gasterosteidae	Gasterosteus	aculeatus		Gasterosteus_aculeatus	1	unknown	Mass	1.8	0.0256		5.42	unknown		Bauchot R, Diagne M, Platel R, Ridet J-M, Bauchot M-L. in Fishbase. www.fishbase.org. date of access: Apr.-13-17
Gasterosteiformes	Gasterosteiformes	Gasterosteidae	Gasterosteus	aculeatus		Gasterosteus_aculeatus	2	unknown	Mass	1.45	0.022		5.06	unknown		Dubois E (1913) On the relation between the quantity of brain and the size of the body in vertebrates
Gasterosteiformes	Gasterosteiformes	Gasterosteidae	Pungitius	pungitius		Pungitius_pungitius	1	unknown	Mass	0.2	0.0047	2.7	3.1	unknown		Bauchot R, Diagne M, Platel R, Ridet J-M, Bauchot M-L. in Fishbase. www.fishbase.org. date of access: Apr.-13-17
Gasterosteiformes	Gasterosteiformes	Gasterosteidae	Pungitius	pungitius		Pungitius_pungitius	1	unknown	Mass	0.4	0.0048	3.1	3.6	unknown		Bauchot R, Diagne M, Platel R, Ridet J-M, Bauchot M-L. in Fishbase. www.fishbase.org. date of access: Apr.-13-17
Gasterosteiformes	Gasterosteiformes	Gasterosteidae	Pungitius	pungitius		Pungitius_pungitius	1	unknown	Mass	0.5	0.0102			unknown		Bauchot R, Diagne M, Platel R, Ridet J-M, Bauchot M-L. in Fishbase. www.fishbase.org. date of access: Apr.-13-17
Gasterosteiformes	Gasterosteiformes	Gasterosteidae	Pungitius	pungitius		Pungitius_pungitius	1	unknown	Mass	0.5	0.0113	3.7	4.2	unknown		Bauchot R, Diagne M, Platel R, Ridet J-M, Bauchot M-L. in Fishbase. www.fishbase.org. date of access: Apr.-13-17
Gasterosteiformes	Gasterosteiformes	Gasterosteidae	Pungitius	pungitius		Pungitius_pungitius	1	unknown	Mass	0.5	0.0119			unknown		Bauchot R, Diagne M, Platel R, Ridet J-M, Bauchot M-L. in Fishbase. www.fishbase.org. date of access: Apr.-13-17
Gasterosteiformes	Gasterosteiformes	Gasterosteidae	Pungitius	pungitius		Pungitius_pungitius	1	unknown	Mass	0.6	0.0114			unknown		Bauchot R, Diagne M, Platel R, Ridet J-M, Bauchot M-L. in Fishbase. www.fishbase.org. date of access: Apr.-13-17
Gasterosteiformes	Gasterosteiformes	Gasterosteidae	Pungitius	pungitius		Pungitius_pungitius	1	unknown	Mass	0.7	0.0105	4	4.6	unknown		Bauchot R, Diagne M, Platel R, Ridet J-M, Bauchot M-L. in Fishbase. www.fishbase.org. date of access: Apr.-13-17
Gasterosteiformes	Gasterosteiformes	Gasterosteidae	Spinachia	spinachia		Spinachia_spinachia	1	unknown	Mass	0.5	0.012	5.5	6	unknown		Bauchot R, Diagne M, Platel R, Ridet J-M, Bauchot M-L. in Fishbase. www.fishbase.org. date of access: Apr.-13-17
Gasterosteiformes	Gasterosteiformes	Gasterosteidae	Spinachia	spinachia		Spinachia_spinachia	1	unknown	Mass	0.7	0.016	6.4	7	unknown		Bauchot R, Diagne M, Platel R, Ridet J-M, Bauchot M-L. in Fishbase. www.fishbase.org. date of access: Apr.-13-17
Gasterosteiformes	Gasterosteiformes	Gasterosteidae	Spinachia	spinachia		Spinachia_spinachia	1	unknown	Mass	0.7	0.015	6.2	6.9	unknown		Bauchot R, Diagne M, Platel R, Ridet J-M, Bauchot M-L. in Fishbase. www.fishbase.org. date of access: Apr.-13-17
Gasterosteiformes	Gasterosteiformes	Gasterosteidae	Spinachia	spinachia		Spinachia_spinachia	1	unknown	Mass	0.7	0.015	6.2	6.9	unknown		Bauchot R, Diagne M, Platel R, Ridet J-M, Bauchot M-L. in Fishbase. www.fishbase.org. date of access: Apr.-13-17
Gasterosteiformes	Gasterosteiformes	Gasterosteidae	Spinachia	spinachia		Spinachia_spinachia	1	unknown	Mass	0.7	0.015	6.2	6.9	unknown		Bauchot R, Diagne M, Platel R, Ridet J-M, Bauchot M-L. in Fishbase. www.fishbase.org. date of access: Apr.-13-17
Gasterosteiformes	Gasterosteiformes	Gasterosteidae	Spinachia	spinachia		Spinachia_spinachia	1	unknown	Mass	0.8	0.014			unknown		Bauchot R, Diagne M, Platel R, Ridet J-M, Bauchot M-L. in Fishbase. www.fishbase.org. date of access: Apr.-13-17
Gasterosteiformes	Gasterosteiformes	Gasterosteidae	Spinachia	spinachia		Spinachia_spinachia	1	unknown	Mass	0.8	0.016	6.8	7.5	unknown		Bauchot R, Diagne M, Platel R, Ridet J-M, Bauchot M-L. in Fishbase. www.fishbase.org. date of access: Apr.-13-17
Gasterosteiformes	Gasterosteiformes	Gasterosteidae	Spinachia	spinachia		Spinachia_spinachia	1	unknown	Mass	0.9	0.014			unknown		Bauchot R, Diagne M, Platel R, Ridet J-M, Bauchot M-L. in Fishbase. www.fishbase.org. date of access: Apr.-13-17
Gasterosteiformes	Gasterosteiformes	Gasterosteidae	Spinachia	spinachia		Spinachia_spinachia	1	unknown	Mass	1	0.019	7.2	8	unknown		Bauchot R, Diagne M, Platel R, Ridet J-M, Bauchot M-L. in Fishbase. www.fishbase.org. date of access: Apr.-13-17
Gasterosteiformes	Gasterosteiformes	Gasterosteidae	Spinachia	spinachia		Spinachia_spinachia	1	unknown	Mass	1	0.018	7.1	7.9	unknown		Bauchot R, Diagne M, Platel R, Ridet J-M, Bauchot M-L. in Fishbase. www.fishbase.org. date of access: Apr.-13-17
Gasterosteiformes	Gasterosteiformes	Gasterosteidae	Spinachia	spinachia		Spinachia_spinachia	1	unknown	Mass	1.2	0.02	7.4	8.2	unknown		Bauchot R, Diagne M, Platel R, Ridet J-M, Bauchot M-L. in Fishbase. www.fishbase.org. date of access: Apr.-13-17
Gasterosteiformes	Gasterosteiformes	Gasterosteidae	Spinachia	spinachia		Spinachia_spinachia	1	unknown	Mass	1.2	0.018	7.6	8.3	unknown		Bauchot R, Diagne M, Platel R, Ridet J-M, Bauchot M-L. in Fishbase. www.fishbase.org. date of access: Apr.-13-17
Gasterosteiformes	Gasterosteiformes	Gasterosteidae	Spinachia	spinachia		Spinachia_spinachia	1	unknown	Mass	1.2	0.018	7.6	8.3	unknown		Bauchot R, Diagne M, Platel R, Ridet J-M, Bauchot M-L. in Fishbase. www.fishbase.org. date of access: Apr.-13-17
Gasterosteiformes	Gasterosteiformes	Gasterosteidae	Spinachia	spinachia		Spinachia_spinachia	1	unknown	Mass	1.2	0.018	7.6	8.3	unknown		Bauchot R, Diagne M, Platel R, Ridet J-M, Bauchot M-L. in Fishbase. www.fishbase.org. date of access: Apr.-13-17
Gasterosteiformes	Gasterosteiformes	Gasterosteidae	Spinachia	spinachia		Spinachia_spinachia	1	unknown	Mass	1.3	0.018	7.6	8.4	unknown		Bauchot R, Diagne M, Platel R, Ridet J-M, Bauchot M-L. in Fishbase. www.fishbase.org. date of access: Apr.-13-17
Gasterosteiformes	Gasterosteiformes	Gasterosteidae	Spinachia	spinachia		Spinachia_spinachia	1	unknown	Mass	1.3	0.02	7.7	8.3	unknown		Bauchot R, Diagne M, Platel R, Ridet J-M, Bauchot M-L. in Fishbase. www.fishbase.org. date of access: Apr.-13-17
Gasterosteiformes	Gasterosteiformes	Gasterosteidae	Spinachia	spinachia		Spinachia_spinachia	1	unknown	Mass	1.4	0.02	7.6	8.4	unknown		Bauchot R, Diagne M, Platel R, Ridet J-M, Bauchot M-L. in Fishbase. www.fishbase.org. date of access: Apr.-13-17
Gasterosteiformes	Gasterosteiformes	Gasterosteidae	Spinachia	spinachia		Spinachia_spinachia	1	unknown	Mass	1.5	0.021	8.2	9	unknown		Bauchot R, Diagne M, Platel R, Ridet J-M, Bauchot M-L. in Fishbase. www.fishbase.org. date of access: Apr.-13-17
Gasterosteiformes	Gasterosteiformes	Gasterosteidae	Spinachia	spinachia		Spinachia_spinachia	1	unknown	Mass	1.5	0.021	8.2	9	unknown		Bauchot R, Diagne M, Platel R, Ridet J-M, Bauchot M-L. in Fishbase. www.fishbase.org. date of access: Apr.-13-17
Gasterosteiformes	Gasterosteiformes	Gasterosteidae	Spinachia	spinachia		Spinachia_spinachia	1	unknown	Mass	1.5	0.021	8.2	9	unknown		Bauchot R, Diagne M, Platel R, Ridet J-M, Bauchot M-L. in Fishbase. www.fishbase.org. date of access: Apr.-13-17
Gasterosteiformes	Gasterosteiformes	Gasterosteidae	Spinachia	spinachia		Spinachia_spinachia	1	unknown	Mass	1.6	0.022	8.5	9.4	unknown		Bauchot R, Diagne M, Platel R, Ridet J-M, Bauchot M-L. in Fishbase. www.fishbase.org. date of access: Apr.-13-17
Gasterosteiformes	Gasterosteiformes	Gasterosteidae	Spinachia	spinachia		Spinachia_spinachia	1	unknown	Mass	1.6	0.024	9	9.8	unknown		Bauchot R, Diagne M, Platel R, Ridet J-M, Bauchot M-L. in Fishbase. www.fishbase.org. date of access: Apr.-13-17
Gasterosteiformes	Gasterosteiformes	Gasterosteidae	Spinachia	spinachia		Spinachia_spinachia	1	unknown	Mass	1.6	0.022	8.5	9.4	unknown		Bauchot R, Diagne M, Platel R, Ridet J-M, Bauchot M-L. in Fishbase. www.fishbase.org. date of access: Apr.-13-17
Gasterosteiformes	Gasterosteiformes	Gasterosteidae	Spinachia	spinachia		Spinachia_spinachia	1	unknown	Mass	1.8	0.023			unknown		Bauchot R, Diagne M, Platel R, Ridet J-M, Bauchot M-L. in Fishbase. www.fishbase.org. date of access: Apr.-13-17
Gasterosteiformes	Gasterosteiformes	Gasterosteidae	Spinachia	spinachia		Spinachia_spinachia	1	unknown	Mass	1.8	0.024	8.7	9.6	unknown		Bauchot R, Diagne M, Platel R, Ridet J-M, Bauchot M-L. in Fishbase. www.fishbase.org. date of access: Apr.-13-17
Gasterosteiformes	Gasterosteiformes	Gasterosteidae	Spinachia	spinachia		Spinachia_spinachia	1	unknown	Mass	1.9	0.022	9.1	10.1	unknown		Bauchot R, Diagne M, Platel R, Ridet J-M, Bauchot M-L. in Fishbase. www.fishbase.org. date of access: Apr.-13-17
Gasterosteiformes	Gasterosteiformes	Gasterosteidae	Spinachia	spinachia		Spinachia_spinachia	1	unknown	Mass	2	0.026	9.4	10.2	unknown		Bauchot R, Diagne M, Platel R, Ridet J-M, Bauchot M-L. in Fishbase. www.fishbase.org. date of access: Apr.-13-17
Gasterosteiformes	Gasterosteiformes	Gasterosteidae	Spinachia	spinachia		Spinachia_spinachia	1	unknown	Mass	2	0.025	9.2	10	unknown		Bauchot R, Diagne M, Platel R, Ridet J-M, Bauchot M-L. in Fishbase. www.fishbase.org. date of access: Apr.-13-17
Gasterosteiformes	Gasterosteiformes	Gasterosteidae	Spinachia	spinachia		Spinachia_spinachia	1	unknown	Mass	2.1	0.025	9.2	10	unknown		Bauchot R, Diagne M, Platel R, Ridet J-M, Bauchot M-L. in Fishbase. www.fishbase.org. date of access: Apr.-13-17
Gasterosteiformes	Gasterosteiformes	Gasterosteidae	Spinachia	spinachia		Spinachia_spinachia	1	unknown	Mass	2.1	0.027	9.1	9.9	unknown		Bauchot R, Diagne M, Platel R, Ridet J-M, Bauchot M-L. in Fishbase. www.fishbase.org. date of access: Apr.-13-17
Gasterosteiformes	Gasterosteiformes	Gasterosteidae	Spinachia	spinachia		Spinachia_spinachia	1	unknown	Mass	2.2	0.025	9.7	10.5	unknown		Bauchot R, Diagne M, Platel R, Ridet J-M, Bauchot M-L. in Fishbase. www.fishbase.org. date of access: Apr.-13-17
Gasterosteiformes	Gasterosteiformes	Gasterosteidae	Spinachia	spinachia		Spinachia_spinachia	1	unknown	Mass	2.5	0.032	10.2	11.1	unknown		Bauchot R, Diagne M, Platel R, Ridet J-M, Bauchot M-L. in Fishbase. www.fishbase.org. date of access: Apr.-13-17
Gasterosteiformes	Gasterosteiformes	Gasterosteidae	Spinachia	spinachia		Spinachia_spinachia	1	unknown	Mass	3	0.033	10.5	11.3	unknown		Bauchot R, Diagne M, Platel R, Ridet J-M, Bauchot M-L. in Fishbase. www.fishbase.org. date of access: Apr.-13-17
Gasterosteiformes	Gasterosteiformes	Gasterosteidae	Spinachia	spinachia		Spinachia_spinachia	1	unknown	Mass	1.5	0.019	8.2	9	unknown		Bauchot R, Diagne M, Platel R, Ridet J-M, Bauchot M-L. in Fishbase. www.fishbase.org. date of access: Apr.-13-17
Syngnathiformes	Gasterosteiformes	Pegasidae	Pegasus	volitans		Pegasus_volitans	1	unknown	Mass	1.3	0.0086			unknown		Bauchot R, Diagne M, Platel R, Ridet J-M, Bauchot M-L. in Fishbase. www.fishbase.org. date of access: Apr.-13-17
Gobiesociformes	Gobiesociformes	Gobiesocidae	Lepadogaster	candolii		Lepadogaster_candolii	1	unknown	Mass	3.9	0.014			unknown		Bauchot R, Diagne M, Platel R, Ridet J-M, Bauchot M-L. in Fishbase. www.fishbase.org. date of access: Apr.-13-17
Gobiesociformes	Gobiesociformes	Gobiesocidae	Lepadogaster	lepadogaster		Lepadogaster_lepadogaster	1	unknown	Mass	2.8	0.0114			unknown		Bauchot R, Diagne M, Platel R, Ridet J-M, Bauchot M-L. in Fishbase. www.fishbase.org. date of access: Apr.-13-17
Gobiesociformes	Gobiesociformes	Gobiesocidae	Lepadogaster	lepadogaster		Lepadogaster_lepadogaster	1	unknown	Mass	3	0.0131	5.5	6.1	unknown		Bauchot R, Diagne M, Platel R, Ridet J-M, Bauchot M-L. in Fishbase. www.fishbase.org. date of access: Apr.-13-17
Gobiesociformes	Gobiesociformes	Gobiesocidae	Lepadogaster	lepadogaster		Lepadogaster_lepadogaster	1	unknown	Mass	3	0.013			unknown		Bauchot R, Diagne M, Platel R, Ridet J-M, Bauchot M-L. in Fishbase. www.fishbase.org. date of access: Apr.-13-17
Gobiesociformes	Gobiesociformes	Gobiesocidae	Lepadogaster	lepadogaster		Lepadogaster_lepadogaster	1	unknown	Mass	4.1	0.0151			unknown		Bauchot R, Diagne M, Platel R, Ridet J-M, Bauchot M-L. in Fishbase. www.fishbase.org. date of access: Apr.-13-17
Gobiesociformes	Gobiesociformes	Gobiesocidae	Lepadogaster	lepadogaster		Lepadogaster_lepadogaster	1	unknown	Mass	5.8	0.0095	4.7	5.8	unknown		Bauchot R, Diagne M, Platel R, Ridet J-M, Bauchot M-L. in Fishbase. www.fishbase.org. date of access: Apr.-13-17
Gobiesociformes	Gobiesociformes	Gobiesocidae	Lepadogaster	lepadogaster		Lepadogaster_lepadogaster	1	unknown	Mass	5.8	0.0106			unknown		Bauchot R, Diagne M, Platel R, Ridet J-M, Bauchot M-L. in Fishbase. www.fishbase.org. date of access: Apr.-13-17
Gobiesociformes	Gobiesociformes	Gobiesocidae	Lepadogaster	lepadogaster		Lepadogaster_lepadogaster	1	unknown	Mass	5.9	0.0109	5.1	5.9	unknown		Bauchot R, Diagne M, Platel R, Ridet J-M, Bauchot M-L. in Fishbase. www.fishbase.org. date of access: Apr.-13-17
Gobiesociformes	Gobiesociformes	Gobiesocidae	Lepadogaster	lepadogaster		Lepadogaster_lepadogaster	1	unknown	Mass	6.3	0.0123	5.6	6.3	unknown		Bauchot R, Diagne M, Platel R, Ridet J-M, Bauchot M-L. in Fishbase. www.fishbase.org. date of access: Apr.-13-17
Gobiesociformes	Gobiesociformes	Gobiesocidae	Lepadogaster	lepadogaster		Lepadogaster_lepadogaster	1	unknown	Mass	6.6	0.0126	5.7	6.6	unknown		Bauchot R, Diagne M, Platel R, Ridet J-M, Bauchot M-L. in Fishbase. www.fishbase.org. date of access: Apr.-13-17
Gobiesociformes	Gobiesociformes	Gobiesocidae	Lepadogaster	lepadogaster		Lepadogaster_lepadogaster	1	unknown	Mass	6.8	0.0143			unknown		Bauchot R, Diagne M, Platel R, Ridet J-M, Bauchot M-L. in Fishbase. www.fishbase.org. date of access: Apr.-13-17
Gymnotiformes	Gymnotiformes	Apteronotidae	Adontosternarchus	balaenops		Adontosternarchus_balaenops	2	unknown	Mass	7.02	0.117			unknown		Albert JS et al. (1999) Proceedings of the 5th Indo-Pacific Fish Conference (Seret B, Sire J-Y, eds), pp 647-656
Gymnotiformes	Gymnotiformes	Apteronotidae	Apteronotus	albifrons		Apteronotus_albifrons	5	unknown	Mass	34.8	0.171			unknown		Albert JS et al. (1999) Proceedings of the 5th Indo-Pacific Fish Conference (Seret B, Sire J-Y, eds), pp 647-656
Gymnotiformes	Gymnotiformes	Apteronotidae	Apteronotus	albifrons		Apteronotus_albifrons	1		Volume Conversion	4.48	0.1175					This study
Gymnotiformes	Gymnotiformes	Apteronotidae	Apteronotus	albifrons		Apteronotus_albifrons	1		Volume Conversion	15.71	0.1416					This study
Gymnotiformes	Gymnotiformes	Apteronotidae	Apteronotus	leptorhynchus		Apteronotus_leptorhynchus	10	unknown	Mass	25.21	0.15			unknown		Albert JS et al. (1999) Proceedings of the 5th Indo-Pacific Fish Conference (Seret B, Sire J-Y, eds), pp 647-656
Gymnotiformes	Gymnotiformes	Apteronotidae	Apteronotus	leptorhynchus		Apteronotus_leptorhynchus	1	unknown	Mass	5.9	0.067			unknown		Bauchot R, Diagne M, Platel R, Ridet J-M, Bauchot M-L. in Fishbase. www.fishbase.org. date of access: Apr.-13-17
Gymnotiformes	Gymnotiformes	Apteronotidae	Apteronotus	leptorhynchus		Apteronotus_leptorhynchus	1	unknown	Mass	11.9	0.095			unknown		Bauchot R, Diagne M, Platel R, Ridet J-M, Bauchot M-L. in Fishbase. www.fishbase.org. date of access: Apr.-13-17
Gymnotiformes	Gymnotiformes	Apteronotidae	Apteronotus	leptorhynchus		Apteronotus_leptorhynchus	1	unknown	Mass	12.2	0.102			unknown		Bauchot R, Diagne M, Platel R, Ridet J-M, Bauchot M-L. in Fishbase. www.fishbase.org. date of access: Apr.-13-17
Gymnotiformes	Gymnotiformes	Apteronotidae	Apteronotus	leptorhynchus		Apteronotus_leptorhynchus	1	unknown	Mass	16	0.115			unknown		Bauchot R, Diagne M, Platel R, Ridet J-M, Bauchot M-L. in Fishbase. www.fishbase.org. date of access: Apr.-13-17
Gymnotiformes	Gymnotiformes	Apteronotidae	Apteronotus	leptorhynchus		Apteronotus_leptorhynchus	1	unknown	Mass	17	0.117			unknown		Bauchot R, Diagne M, Platel R, Ridet J-M, Bauchot M-L. in Fishbase. www.fishbase.org. date of access: Apr.-13-17
Gymnotiformes	Gymnotiformes	Apteronotidae	Apteronotus	leptorhynchus		Apteronotus_leptorhynchus	1	unknown	Mass	19	0.128			unknown		Bauchot R, Diagne M, Platel R, Ridet J-M, Bauchot M-L. in Fishbase. www.fishbase.org. date of access: Apr.-13-17
Gymnotiformes	Gymnotiformes	Apteronotidae	Apteronotus	leptorhynchus		Apteronotus_leptorhynchus	1	unknown	Mass	22	0.135			unknown		Bauchot R, Diagne M, Platel R, Ridet J-M, Bauchot M-L. in Fishbase. www.fishbase.org. date of access: Apr.-13-17
Gymnotiformes	Gymnotiformes	Apteronotidae	Apteronotus	leptorhynchus		Apteronotus_leptorhynchus	1	unknown	Mass	25.2	0.15			unknown		Bauchot R, Diagne M, Platel R, Ridet J-M, Bauchot M-L. in Fishbase. www.fishbase.org. date of access: Apr.-13-17
Gymnotiformes	Gymnotiformes	Apteronotidae	Apteronotus	leptorhynchus		Apteronotus_leptorhynchus	1	unknown	Mass	37	0.156			unknown		Bauchot R, Diagne M, Platel R, Ridet J-M, Bauchot M-L. in Fishbase. www.fishbase.org. date of access: Apr.-13-17
Gymnotiformes	Gymnotiformes	Apteronotidae	Orthosternarchus	tamandua		Orthosternarchus_tamandua	1	unknown	Mass	13.04	0.219			unknown		Albert JS et al. (1999) Proceedings of the 5th Indo-Pacific Fish Conference (Seret B, Sire J-Y, eds), pp 647-656
Gymnotiformes	Gymnotiformes	Apteronotidae	Porotergus	compsus		Porotergus_compsus	14	unknown	Mass	14.15	0.127			unknown		Albert JS et al. (1999) Proceedings of the 5th Indo-Pacific Fish Conference (Seret B, Sire J-Y, eds), pp 647-656
Gymnotiformes	Gymnotiformes	Apteronotidae	Sternarchella	calhamazon		Sternarchella_calhamazon	1		Volume Conversion	6.05	0.0461					This study
Gymnotiformes	Gymnotiformes	Apteronotidae	Sternarchella	calhamazon		Sternarchella_calhamazon	1		Volume Conversion	8.72	0.0434					This study
Gymnotiformes	Gymnotiformes	Apteronotidae	Sternarchella	orthos		Sternarchella_orthos	5	unknown	Mass	12.15	0.131			unknown		Albert JS et al. (1999) Proceedings of the 5th Indo-Pacific Fish Conference (Seret B, Sire J-Y, eds), pp 647-656
Gymnotiformes	Gymnotiformes	Apteronotidae	Sternarchella	orthos		Sternarchella_orthos	1		Volume Conversion	56.98	0.2173					This study
Gymnotiformes	Gymnotiformes	Apteronotidae	Sternarchella	sima		Sternarchella_sima	5	unknown	Mass	32.8	0.258			unknown		Albert JS et al. (1999) Proceedings of the 5th Indo-Pacific Fish Conference (Seret B, Sire J-Y, eds), pp 647-656
Gymnotiformes	Gymnotiformes	Apteronotidae	Sternarchorhamphus	muelleri		Sternarchorhamphus_muelleri	1	unknown	Mass	22.1	0.208			unknown		Albert JS et al. (1999) Proceedings of the 5th Indo-Pacific Fish Conference (Seret B, Sire J-Y, eds), pp 647-656
Gymnotiformes	Gymnotiformes	Apteronotidae	Sternarchorhynchus	curvirostris		Sternarchorhynchus_curvirostris	1	unknown	Mass	13	0.179			unknown		Albert JS et al. (1999) Proceedings of the 5th Indo-Pacific Fish Conference (Seret B, Sire J-Y, eds), pp 647-656
Gymnotiformes	Gymnotiformes	Gymnotidae	Electrophorus	spp		Electrophorus_spp	1		Volume Conversion	3.46	0.0508					This study
Gymnotiformes	Gymnotiformes	Gymnotidae	Electrophorus	spp		Electrophorus_spp	1		Volume Conversion	2.3	0.0385					This study
Gymnotiformes	Gymnotiformes	Gymnotidae	Gymnotus	carapo		Gymnotus_carapo	5	unknown	Mass	20.01	0.108			unknown		Albert JS et al. (1999) Proceedings of the 5th Indo-Pacific Fish Conference (Seret B, Sire J-Y, eds), pp 647-656
Gymnotiformes	Gymnotiformes	Gymnotidae	Gymnotus	carapo		Gymnotus_carapo	1	unknown	Mass	36	0.118			unknown		Bauchot R, Diagne M, Platel R, Ridet J-M, Bauchot M-L. in Fishbase. www.fishbase.org. date of access: Apr.-13-17
Gymnotiformes	Gymnotiformes	Gymnotidae	Gymnotus	carapo		Gymnotus_carapo	1	unknown	Mass	96	0.166			unknown		Bauchot R, Diagne M, Platel R, Ridet J-M, Bauchot M-L. in Fishbase. www.fishbase.org. date of access: Apr.-13-17
Gymnotiformes	Gymnotiformes	Gymnotidae	Gymnotus	carapo		Gymnotus_carapo	1		Volume Conversion	3.93	0.0477					This study
Gymnotiformes	Gymnotiformes	Gymnotidae	Gymnotus	carapo		Gymnotus_carapo	1		Volume Conversion	38.33	0.1143					This study
Gymnotiformes	Gymnotiformes	Gymnotidae	Gymnotus	javari		Gymnotus_javari	1		Volume Conversion	8.44	0.0454					This study
Gymnotiformes	Gymnotiformes	Gymnotidae	Gymnotus	javari		Gymnotus_javari	1		Volume Conversion	2.82	0.0226					This study
Gymnotiformes	Gymnotiformes	Hypopomidae	Brachyhypopomus	brevirostris		Brachyhypopomus_brevirostris	1	unknown	Mass	11.46	0.09			unknown		Albert JS et al. (1999) Proceedings of the 5th Indo-Pacific Fish Conference (Seret B, Sire J-Y, eds), pp 647-656
Gymnotiformes	Gymnotiformes	Hypopomidae	Brachyhypopomus	gauderio		Brachyhypopomus_gauderio	1		Volume Conversion	2.46	0.0306					This study
Gymnotiformes	Gymnotiformes	Hypopomidae	Brachyhypopomus	gauderio		Brachyhypopomus_gauderio	1		Volume Conversion	8.79	0.0467					This study
Gymnotiformes	Gymnotiformes	Hypopomidae	Steatogenys	duidae		Steatogenys_duidae	1	unknown	Mass	5.65	0.078			unknown		Albert JS et al. (1999) Proceedings of the 5th Indo-Pacific Fish Conference (Seret B, Sire J-Y, eds), pp 647-656
Gymnotiformes	Gymnotiformes	Hypopomidae	Steatogenys	elegans		Steatogenys_elegans	3	unknown	Mass	11.96	0.093			unknown		Albert JS et al. (1999) Proceedings of the 5th Indo-Pacific Fish Conference (Seret B, Sire J-Y, eds), pp 647-656
Gymnotiformes	Gymnotiformes	Rhamphichthyidae	Steatogenys	elegans		Steatogenys_elegans	1		Volume Conversion	9.28	0.0826					This study
Gymnotiformes	Gymnotiformes	Rhamphichthyidae	Steatogenys	elegans		Steatogenys_elegans	1		Volume Conversion	8.04	0.0765					This study
Gymnotiformes	Gymnotiformes	Sternopygidae	Eigenmannia	limbata		Eigenmannia_limbata	1		Volume Conversion	6.66	0.08					This study
Gymnotiformes	Gymnotiformes	Sternopygidae	Eigenmannia	virescens		Eigenmannia_virescens	1		Volume Conversion	3.65	0.041					This study
Gymnotiformes	Gymnotiformes	Sternopygidae	Eigenmannia	virescens		Eigenmannia_virescens	1		Volume Conversion	3.68	0.0385					This study
Gymnotiformes	Gymnotiformes	Sternopygidae	Eigenmannia	virescens		Eigenmannia_virescens	1		Volume Conversion	3.71	0.0489					This study
Gymnotiformes	Gymnotiformes	Sternopygidae	Sternopygus	macrurus		Sternopygus_macrurus	1		Volume Conversion	17.986	0.1089					This study
Gymnotiformes	Gymnotiformes	Sternopygidae	Sternopygus	macrurus		Sternopygus_macrurus	1		Volume Conversion	3.83	0.0658					This study
Gymnotiformes	Gymnotiformes	Sternopygidae	Sternopygus	macrurus		Sternopygus_macrurus	1		Volume Conversion	45.78	0.1615					This study
Lepisosteiformes	Lepisosteiformes	Lepisosteidae	Lepisosteus	osseus		Lepisosteus_osseus	1	unknown	Mass	35.86	0.2			unknown		Albert JS et al. (1999) Proceedings of the 5th Indo-Pacific Fish Conference (Seret B, Sire J-Y, eds), pp 647-656
Lepisosteiformes	Lepisosteiformes	Lepisosteidae	Lepisosteus	osseus		Lepisosteus_osseus	1	unknown	Mass	1065	0.629			unknown		Bauchot R, Diagne M, Platel R, Ridet J-M, Bauchot M-L. in Fishbase. www.fishbase.org. date of access: Apr.-13-17
Lophiiformes	Lophiiformes	Antennariidae	Antennatus	coccineus		Antennatus_coccineus	1	unknown	Mass	3.1	0.012	3.6	4.3	unknown		Bauchot R, Diagne M, Platel R, Ridet J-M, Bauchot M-L. in Fishbase. www.fishbase.org. date of access: Apr.-13-17
Lophiiformes	Lophiiformes	Lophiidae	Lophius	budegassa		Lophius_budegassa	1	unknown	Mass	500	0.183	30		unknown		Bauchot R, Diagne M, Platel R, Ridet J-M, Bauchot M-L. in Fishbase. www.fishbase.org. date of access: Apr.-13-17
Lophiiformes	Lophiiformes	Lophiidae	Lophius	piscatorius		Lophius_piscatorius	1	unknown	Mass	650	0.25	32		Adult		Bauchot R, Diagne M, Platel R, Ridet J-M, Bauchot M-L. in Fishbase. www.fishbase.org. date of access: Apr.-13-17
Lophiiformes	Lophiiformes	Lophiidae	Lophius	piscatorius		Lophius_piscatorius	1	unknown	Mass	1300	0.362			Adult		Bauchot R, Diagne M, Platel R, Ridet J-M, Bauchot M-L. in Fishbase. www.fishbase.org. date of access: Apr.-13-17
Lophiiformes	Lophiiformes	Lophiidae	Lophius	piscatorius		Lophius_piscatorius	1	unknown	Mass	7000	0.859	71	86	Adult		Bauchot R, Diagne M, Platel R, Ridet J-M, Bauchot M-L. in Fishbase. www.fishbase.org. date of access: Apr.-13-17
Lophiiformes	Lophiiformes	Lophiidae	Lophius	piscatorius		Lophius_piscatorius	1	unknown	Mass	14400	0.621		97	Adult		Bauchot R, Diagne M, Platel R, Ridet J-M, Bauchot M-L. in Fishbase. www.fishbase.org. date of access: Apr.-13-17
Mugiliformes	Mugiliformes	Mugilidae	Crenimugil	crenilabis		Crenimugil_crenilabis	1	unknown	Mass	13.1	0.055			unknown		Nilsson GE et al. (2000) Proc. R. Soc. B 267:1335-1339
Mugiliformes	Mugiliformes	Mugilidae	Crenimugil	crenilabis		Crenimugil_crenilabis	1	unknown	Mass	15.3	0.053			unknown		Nilsson GE et al. (2000) Proc. R. Soc. B 267:1335-1339
Mugiliformes	Mugiliformes	Mugilidae	Liza	aurata		Liza_aurata	1	unknown	Mass	367	0.327	28.2	34.5	unknown		Bauchot R, Diagne M, Platel R, Ridet J-M, Bauchot M-L. in Fishbase. www.fishbase.org. date of access: Apr.-13-17
Myctophiformes	Myctophiformes	Myctophidae	Ceratoscopelus	warmingii		Ceratoscopelus_warmingii	1	unknown	Mass	3	0.0282			unknown		Bauchot R, Diagne M, Platel R, Ridet J-M, Bauchot M-L. in Fishbase. www.fishbase.org. date of access: Apr.-13-17
Myctophiformes	Myctophiformes	Myctophidae	Myctophum	punctatum		Myctophum_punctatum	1	unknown	Mass	5.6	0.0361	7	8.5	unknown		Bauchot R, Diagne M, Platel R, Ridet J-M, Bauchot M-L. in Fishbase. www.fishbase.org. date of access: Apr.-13-17
Myctophiformes	Myctophiformes	Myctophidae	Myctophum	punctatum		Myctophum_punctatum	1	unknown	Mass	8.2	0.0368	8.3	10.5	unknown		Bauchot R, Diagne M, Platel R, Ridet J-M, Bauchot M-L. in Fishbase. www.fishbase.org. date of access: Apr.-13-17
Myctophiformes	Myctophiformes	Myctophidae	Myctophum	punctatum		Myctophum_punctatum	1	unknown	Mass	8.3	0.0521	8.3		unknown		Bauchot R, Diagne M, Platel R, Ridet J-M, Bauchot M-L. in Fishbase. www.fishbase.org. date of access: Apr.-13-17
Myctophiformes	Myctophiformes	Myctophidae	Nannobrachium	atrum		Nannobrachium_atrum	1	unknown	Mass	10.7	0.0502	10.2	12	unknown		Bauchot R, Diagne M, Platel R, Ridet J-M, Bauchot M-L. in Fishbase. www.fishbase.org. date of access: Apr.-13-17
Myctophiformes	Myctophiformes	Myctophidae	Nannobrachium	atrum		Nannobrachium_atrum	1	unknown	Mass	5	0.0362	10.2	11.5	unknown		Bauchot R, Diagne M, Platel R, Ridet J-M, Bauchot M-L. in Fishbase. www.fishbase.org. date of access: Apr.-13-17
Myctophiformes	Myctophiformes	Myctophidae	Nannobrachium	lineatum		Nannobrachium_lineatum	1	unknown	Mass	20	0.0422			unknown		Bauchot R, Diagne M, Platel R, Ridet J-M, Bauchot M-L. in Fishbase. www.fishbase.org. date of access: Apr.-13-17
Myctophiformes	Myctophiformes	Myctophidae	Notoscopelus	caudispinosus		Notoscopelus_caudispinosus	1	unknown	Mass	9	0.0756			unknown		Bauchot R, Diagne M, Platel R, Ridet J-M, Bauchot M-L. in Fishbase. www.fishbase.org. date of access: Apr.-13-17
Myctophiformes	Myctophiformes	Myctophidae	Stenobrachius	leucopsarus		Stenobrachius_leucopsarus	1	unknown	Mass	4.7	0.025		8.5	unknown		Bauchot R, Diagne M, Platel R, Ridet J-M, Bauchot M-L. in Fishbase. www.fishbase.org. date of access: Apr.-13-17
Myctophiformes	Myctophiformes	Myctophidae	Stenobrachius	leucopsarus		Stenobrachius_leucopsarus	1	unknown	Mass	5	0.0368			unknown		Bauchot R, Diagne M, Platel R, Ridet J-M, Bauchot M-L. in Fishbase. www.fishbase.org. date of access: Apr.-13-17
Notacanthiformes	Notacanthiformes	Notacanthidae	Notacanthus	bonaparte		Notacanthus_bonaparte	1	unknown	Mass	44	0.079			unknown		Bauchot R, Diagne M, Platel R, Ridet J-M, Bauchot M-L. in Fishbase. www.fishbase.org. date of access: Apr.-13-17
Notacanthiformes	Notacanthiformes	Notacanthidae	Notacanthus	bonaparte		Notacanthus_bonaparte	1	unknown	Mass	75	0.12			unknown		Bauchot R, Diagne M, Platel R, Ridet J-M, Bauchot M-L. in Fishbase. www.fishbase.org. date of access: Apr.-13-17
Notacanthiformes	Notacanthiformes	Notacanthidae	Notacanthus	bonaparte		Notacanthus_bonaparte	1	unknown	Mass	85	0.152			unknown		Bauchot R, Diagne M, Platel R, Ridet J-M, Bauchot M-L. in Fishbase. www.fishbase.org. date of access: Apr.-13-17
Notacanthiformes	Notacanthiformes	Notacanthidae	Notacanthus	bonaparte		Notacanthus_bonaparte	1	unknown	Mass	105	0.166			unknown		Bauchot R, Diagne M, Platel R, Ridet J-M, Bauchot M-L. in Fishbase. www.fishbase.org. date of access: Apr.-13-17
Notacanthiformes	Notacanthiformes	Notacanthidae	Notacanthus	bonaparte		Notacanthus_bonaparte	1	unknown	Mass	125	0.149			unknown		Bauchot R, Diagne M, Platel R, Ridet J-M, Bauchot M-L. in Fishbase. www.fishbase.org. date of access: Apr.-13-17
Notacanthiformes	Notacanthiformes	Notacanthidae	Notacanthus	bonaparte		Notacanthus_bonaparte	1	unknown	Mass	250	0.194			unknown		Bauchot R, Diagne M, Platel R, Ridet J-M, Bauchot M-L. in Fishbase. www.fishbase.org. date of access: Apr.-13-17
Notacanthiformes	Notacanthiformes	Notacanthidae	Notacanthus	chemnitzii		Notacanthus_chemnitzii	1	unknown	Mass	4500	0.812	102		unknown		Bauchot R, Diagne M, Platel R, Ridet J-M, Bauchot M-L. in Fishbase. www.fishbase.org. date of access: Apr.-13-17
Ophidiiformes	Ophidiiformes	Carapidae	Carapus	mourlani		Carapus_mourlani	1	unknown	Mass	13.3	0.0093		21	Adult		Bauchot R, Diagne M, Platel R, Ridet J-M, Bauchot M-L. in Fishbase. www.fishbase.org. date of access: Apr.-13-17
Ophidiiformes	Ophidiiformes	Carapidae	Echiodon	drummondii		Echiodon_drummondii	1	unknown	Mass	16	0.031	29	30	Adult		Bauchot R, Diagne M, Platel R, Ridet J-M, Bauchot M-L. in Fishbase. www.fishbase.org. date of access: Apr.-13-17
Ophidiiformes	Ophidiiformes	Ophidiidae	Acanthonus	armatus		Acanthonus_armatus	1	unknown	Mass	180	0.0487			unknown		Fine ML et al. (1987) Proc. R. Soc. B 230:257-265
Ophidiiformes	Ophidiiformes	Ophidiidae	Acanthonus	armatus		Acanthonus_armatus	1	unknown	Mass	183	0.046			unknown		Fine ML et al. (1987) Proc. R. Soc. B 230:257-265
Ophidiiformes	Ophidiiformes	Ophidiidae	Acanthonus	armatus		Acanthonus_armatus	1	unknown	Mass	161	0.035			unknown		Fine ML et al. (1987) Proc. R. Soc. B 230:257-265
Ophidiiformes	Ophidiiformes	Ophidiidae	Acanthonus	armatus		Acanthonus_armatus	1	unknown	Mass	138	0.035			unknown		Fine ML et al. (1987) Proc. R. Soc. B 230:257-265
Ophidiiformes	Ophidiiformes	Ophidiidae	Acanthonus	armatus		Acanthonus_armatus	1	unknown	Mass	83	0.029			unknown		Fine ML et al. (1987) Proc. R. Soc. B 230:257-265
Ophidiiformes	Ophidiiformes	Ophidiidae	Acanthonus	armatus		Acanthonus_armatus	1	unknown	Mass	62	0.028			unknown		Fine ML et al. (1987) Proc. R. Soc. B 230:257-265
Ophidiiformes	Ophidiiformes	Ophidiidae	Acanthonus	armatus		Acanthonus_armatus	1	unknown	Mass	35	0.023			unknown		Fine ML et al. (1987) Proc. R. Soc. B 230:257-265
Ophidiiformes	Ophidiiformes	Ophidiidae	Acanthonus	armatus		Acanthonus_armatus	1	unknown	Mass	25	0.02			unknown		Fine ML et al. (1987) Proc. R. Soc. B 230:257-265
Ophidiiformes	Ophidiiformes	Ophidiidae	Acanthonus	armatus		Acanthonus_armatus	1	unknown	Mass	20.5	0.018			unknown		Fine ML et al. (1987) Proc. R. Soc. B 230:257-265
Ophidiiformes	Ophidiiformes	Ophidiidae	Acanthonus	armatus		Acanthonus_armatus	1	unknown	Mass	23.6	0.017			unknown		Fine ML et al. (1987) Proc. R. Soc. B 230:257-265
Ophidiiformes	Ophidiiformes	Ophidiidae	Acanthonus	armatus		Acanthonus_armatus	1	unknown	Mass	13.6	0.015			unknown		Fine ML et al. (1987) Proc. R. Soc. B 230:257-265
Ophidiiformes	Ophidiiformes	Ophidiidae	Acanthonus	armatus		Acanthonus_armatus	1	unknown	Mass	15.5	0.014			unknown		Fine ML et al. (1987) Proc. R. Soc. B 230:257-265
Ophidiiformes	Ophidiiformes	Ophidiidae	Acanthonus	armatus		Acanthonus_armatus	1	unknown	Mass	7.4	0.013			unknown		Fine ML et al. (1987) Proc. R. Soc. B 230:257-265
Ophidiiformes	Ophidiiformes	Ophidiidae	Acanthonus	armatus		Acanthonus_armatus	1	unknown	Mass	5	0.011			unknown		Fine ML et al. (1987) Proc. R. Soc. B 230:257-265
Ophidiiformes	Ophidiiformes	Ophidiidae	Acanthonus	armatus		Acanthonus_armatus	1	unknown	Mass	7.4	0.01			unknown		Fine ML et al. (1987) Proc. R. Soc. B 230:257-265
Ophidiiformes	Ophidiiformes	Ophidiidae	Acanthonus	armatus		Acanthonus_armatus	1	unknown	Mass	5.6	0.007			unknown		Fine ML et al. (1987) Proc. R. Soc. B 230:257-265
Ophidiiformes	Ophidiiformes	Ophidiidae	Acanthonus	armatus		Acanthonus_armatus	1	unknown	Mass	2.3	0.0062			unknown		Fine ML et al. (1987) Proc. R. Soc. B 230:257-265
Ophidiiformes	Ophidiiformes	Ophidiidae	Brotula	barbata		Brotula_barbata	1	unknown	Mass	1.2	0.02			unknown		Iglesias TL et al. (2015) J. Evol. Biol. 28:1080-1090
Ophidiiformes	Ophidiiformes	Ophidiidae	Brotula	multibarbata		Brotula_multibarbata	1	unknown	Mass	344.3	0.418			unknown		Bauchot R, Diagne M, Platel R, Ridet J-M, Bauchot M-L. in Fishbase. www.fishbase.org. date of access: Apr.-13-17
Alepocephaliformes	Osmeriformes	Alepocephalidae	Xenodermichthys	copei		Xenodermichthys_copei	1	unknown	Mass	38	0.0752			unknown		Bauchot R, Diagne M, Platel R, Ridet J-M, Bauchot M-L. in Fishbase. www.fishbase.org. date of access: Apr.-13-17
Alepocephaliformes	Osmeriformes	Alepocephalidae	Xenodermichthys	copei		Xenodermichthys_copei	1	unknown	Mass	27.93	0.064			unknown		Bauchot R, Diagne M, Platel R, Ridet J-M, Bauchot M-L. in Fishbase. www.fishbase.org. date of access: Apr.-13-17
Argentiniformes	Osmeriformes	Argentinidae	Argentina	silus		Argentina_silus	1	unknown	Mass	137	0.34	23.5	26.5	unknown		Bauchot R, Diagne M, Platel R, Ridet J-M, Bauchot M-L. in Fishbase. www.fishbase.org. date of access: Apr.-13-17
Argentiniformes	Osmeriformes	Argentinidae	Argentina	silus		Argentina_silus	1	unknown	Mass	170	0.474	28	32.5	unknown		Bauchot R, Diagne M, Platel R, Ridet J-M, Bauchot M-L. in Fishbase. www.fishbase.org. date of access: Apr.-13-17
Argentiniformes	Osmeriformes	Argentinidae	Argentina	silus		Argentina_silus	1	unknown	Mass	230	0.458			unknown		Bauchot R, Diagne M, Platel R, Ridet J-M, Bauchot M-L. in Fishbase. www.fishbase.org. date of access: Apr.-13-17
Argentiniformes	Osmeriformes	Argentinidae	Argentina	silus		Argentina_silus	1	unknown	Mass	270	0.676			unknown		Bauchot R, Diagne M, Platel R, Ridet J-M, Bauchot M-L. in Fishbase. www.fishbase.org. date of access: Apr.-13-17
Argentiniformes	Osmeriformes	Argentinidae	Argentina	silus		Argentina_silus	1	unknown	Mass	340	0.422	30	35	unknown		Bauchot R, Diagne M, Platel R, Ridet J-M, Bauchot M-L. in Fishbase. www.fishbase.org. date of access: Apr.-13-17
Argentiniformes	Osmeriformes	Argentinidae	Argentina	silus		Argentina_silus	1	unknown	Mass	530	0.588	34.5	40	unknown		Bauchot R, Diagne M, Platel R, Ridet J-M, Bauchot M-L. in Fishbase. www.fishbase.org. date of access: Apr.-13-17
Argentiniformes	Osmeriformes	Argentinidae	Argentina	sphyraena		Argentina_sphyraena	1	unknown	Mass	50	0.195			unknown		Bauchot R, Diagne M, Platel R, Ridet J-M, Bauchot M-L. in Fishbase. www.fishbase.org. date of access: Apr.-13-17
Argentiniformes	Osmeriformes	Argentinidae	Argentina	sphyraena		Argentina_sphyraena	1	unknown	Mass	60	0.226	20	23	unknown		Bauchot R, Diagne M, Platel R, Ridet J-M, Bauchot M-L. in Fishbase. www.fishbase.org. date of access: Apr.-13-17
Argentiniformes	Osmeriformes	Argentinidae	Argentina	sphyraena		Argentina_sphyraena	1	unknown	Mass	92	0.19	20.5	24	unknown		Bauchot R, Diagne M, Platel R, Ridet J-M, Bauchot M-L. in Fishbase. www.fishbase.org. date of access: Apr.-13-17
Argentiniformes	Osmeriformes	Opisthoproctidae	Opisthoproctus	soleatus		Opisthoproctus_soleatus	1	unknown	Mass	7.9	0.026			unknown		Bauchot R, Diagne M, Platel R, Ridet J-M, Bauchot M-L. in Fishbase. www.fishbase.org. date of access: Apr.-13-17
Osmeriformes	Osmeriformes	Osmeridae	Mallotus	villosus		Mallotus_villosus	1	unknown	Mass	19.6	0.081			unknown		Bauchot R, Diagne M, Platel R, Ridet J-M, Bauchot M-L. in Fishbase. www.fishbase.org. date of access: Apr.-13-17
Osmeriformes	Osmeriformes	Osmeridae	Mallotus	villosus		Mallotus_villosus	1	unknown	Mass	22	0.089			unknown		Bauchot R, Diagne M, Platel R, Ridet J-M, Bauchot M-L. in Fishbase. www.fishbase.org. date of access: Apr.-13-17
Osmeriformes	Osmeriformes	Osmeridae	Mallotus	villosus		Mallotus_villosus	1	unknown	Mass	22.7	0.096			unknown		Bauchot R, Diagne M, Platel R, Ridet J-M, Bauchot M-L. in Fishbase. www.fishbase.org. date of access: Apr.-13-17
Osmeriformes	Osmeriformes	Osmeridae	Mallotus	villosus		Mallotus_villosus	1	unknown	Mass	29	0.111			unknown		Bauchot R, Diagne M, Platel R, Ridet J-M, Bauchot M-L. in Fishbase. www.fishbase.org. date of access: Apr.-13-17
Osmeriformes	Osmeriformes	Osmeridae	Osmerus	mordax		Osmerus_mordax	1	unknown	Mass	47.66	0.109			unknown		Crile G and Quiring DP (1940) Ohio J Sci 40:219-259.	Lake Erie Cleveland; Brain weight one digit misrecorded. Changed from 1.09 to 0.109 g
Osmeriformes	Osmeriformes	Osmeridae	Osmerus	mordax		Osmerus_mordax	1	unknown	Mass	74	0.116			unknown		Bauchot R, Diagne M, Platel R, Ridet J-M, Bauchot M-L. in Fishbase. www.fishbase.org. date of access: Apr.-13-17
Osmeriformes	Osmeriformes	Osmeridae	Osmerus	mordax		Osmerus_mordax	1	unknown	Mass	75	0.127			unknown		Bauchot R, Diagne M, Platel R, Ridet J-M, Bauchot M-L. in Fishbase. www.fishbase.org. date of access: Apr.-13-17
Alepocephaliformes	Osmeriformes	Alepocephalidae	Alepocephalus	bairdii		Alepocephalus_bairdii	1	unknown	Mass	1400	0.722			unknown		Bauchot R, Diagne M, Platel R, Ridet J-M, Bauchot M-L. in Fishbase. www.fishbase.org. date of access: Apr.-13-17
Alepocephaliformes	Osmeriformes	Alepocephalidae	Alepocephalus	bairdii		Alepocephalus_bairdii	1	unknown	Mass	1500	0.573			unknown		Bauchot R, Diagne M, Platel R, Ridet J-M, Bauchot M-L. in Fishbase. www.fishbase.org. date of access: Apr.-13-17
Alepocephaliformes	Osmeriformes	Alepocephalidae	Alepocephalus	bairdii		Alepocephalus_bairdii	1	unknown	Mass	2050	0.908			unknown		Bauchot R, Diagne M, Platel R, Ridet J-M, Bauchot M-L. in Fishbase. www.fishbase.org. date of access: Apr.-13-17
Alepocephaliformes	Osmeriformes	Alepocephalidae	Alepocephalus	bairdii		Alepocephalus_bairdii	1	unknown	Mass	2620	1.004			unknown		Bauchot R, Diagne M, Platel R, Ridet J-M, Bauchot M-L. in Fishbase. www.fishbase.org. date of access: Apr.-13-17
Alepocephaliformes	Osmeriformes	Alepocephalidae	Alepocephalus	rostratus		Alepocephalus_rostratus	1	unknown	Mass	720	0.466			unknown		Bauchot R, Diagne M, Platel R, Ridet J-M, Bauchot M-L. in Fishbase. www.fishbase.org. date of access: Apr.-13-17
Alepocephaliformes	Osmeriformes	Alepocephalidae	Alepocephalus	rostratus		Alepocephalus_rostratus	1	unknown	Mass	815	0.414			unknown		Bauchot R, Diagne M, Platel R, Ridet J-M, Bauchot M-L. in Fishbase. www.fishbase.org. date of access: Apr.-13-17
Alepocephaliformes	Osmeriformes	Alepocephalidae	Alepocephalus	rostratus		Alepocephalus_rostratus	1	unknown	Mass	910	0.471			unknown		Bauchot R, Diagne M, Platel R, Ridet J-M, Bauchot M-L. in Fishbase. www.fishbase.org. date of access: Apr.-13-17
Alepocephaliformes	Osmeriformes	Alepocephalidae	Alepocephalus	rostratus		Alepocephalus_rostratus	1	unknown	Mass	1180	0.493			unknown		Bauchot R, Diagne M, Platel R, Ridet J-M, Bauchot M-L. in Fishbase. www.fishbase.org. date of access: Apr.-13-17
Osteoglossiformes	Osteoglossiformes	Arapaimidae	Arapaima	gigas		Arapaima_gigas	1	unknown	Mass	496	1.142			unknown		Bauchot R, Diagne M, Platel R, Ridet J-M, Bauchot M-L. in Fishbase. www.fishbase.org. date of access: Apr.-13-17
Osteoglossiformes	Osteoglossiformes	Arapaimidae	Heterotis	niloticus		Heterotis_niloticus	2	unknown	Mass	343.3	1.6			unknown		Albert JS et al. (1999) Proceedings of the 5th Indo-Pacific Fish Conference (Seret B, Sire J-Y, eds), pp 647-656
Osteoglossiformes	Osteoglossiformes	Gymnarchidae	Gymnarchus	niloticus		Gymnarchus_niloticus	1		Mass	12.65	0.26365					Sukhum et al (2016) Proc.B. 283: 20162157
Osteoglossiformes	Osteoglossiformes	Gymnarchidae	Gymnarchus	niloticus		Gymnarchus_niloticus	1		Mass	1.32	0.06229					Sukhum et al (2016) Proc.B. 283: 20162157
Osteoglossiformes	Osteoglossiformes	Mormyridae	Boulengeromyrus	knoepffleri		Boulengeromyrus_knoepffleri	1		Mass	13.7	0.38508					Sukhum et al (2016) Proc.B. 283: 20162157
Osteoglossiformes	Osteoglossiformes	Mormyridae	Brevimyrus	niger		Brevimyrus_niger	1		Mass	4.23	0.09483					Sukhum et al (2016) Proc.B. 283: 20162157
Osteoglossiformes	Osteoglossiformes	Mormyridae	Brevimyrus	niger		Brevimyrus_niger	1		Mass	3.59	0.08377					Sukhum et al (2016) Proc.B. 283: 20162157
Osteoglossiformes	Osteoglossiformes	Mormyridae	Brevimyrus	niger		Brevimyrus_niger	1		Mass	1.6	0.05057					Sukhum et al (2016) Proc.B. 283: 20162157
Osteoglossiformes	Osteoglossiformes	Mormyridae	Brevimyrus	niger		Brevimyrus_niger	1		Mass	6.12	0.052					This study
Osteoglossiformes	Osteoglossiformes	Mormyridae	Brevimyrus	niger		Brevimyrus_niger	1		Mass	3.02	0.0336					This study
Osteoglossiformes	Osteoglossiformes	Mormyridae	Brevimyrus	niger		Brevimyrus_niger	1		Volume Conversion	2.95	0.064					This study
Osteoglossiformes	Osteoglossiformes	Mormyridae	Brevimyrus	niger		Brevimyrus_niger	1		Volume Conversion	4.57	0.0786					This study
Osteoglossiformes	Osteoglossiformes	Mormyridae	Brevimyrus	niger		Brevimyrus_niger	1		Volume Conversion	9.52	0.1803					This study
Osteoglossiformes	Osteoglossiformes	Mormyridae	Brienomyrus	brachyistius		Brienomyrus_brachyistius	1		Mass	13.68	0.11523					Sukhum et al (2016) Proc.B. 283: 20162157
Osteoglossiformes	Osteoglossiformes	Mormyridae	Brienomyrus	brachyistius		Brienomyrus_brachyistius	1		Mass	21.01	0.14257					Sukhum et al (2016) Proc.B. 283: 20162157
Osteoglossiformes	Osteoglossiformes	Mormyridae	Brienomyrus	brachyistius		Brienomyrus_brachyistius	1		Mass	7.84	0.08679					Sukhum et al (2016) Proc.B. 283: 20162157
Osteoglossiformes	Osteoglossiformes	Mormyridae	Brienomyrus	brachyistius		Brienomyrus_brachyistius	1		Mass	20.87	0.15005					Sukhum et al (2016) Proc.B. 283: 20162157
Osteoglossiformes	Osteoglossiformes	Mormyridae	Brienomyrus	brachyistius		Brienomyrus_brachyistius	1		Mass	14.46	0.14436					Sukhum et al (2016) Proc.B. 283: 20162157
Osteoglossiformes	Osteoglossiformes	Mormyridae	Brienomyrus	brachyistius		Brienomyrus_brachyistius	1		Mass	6.96	0.08862					Sukhum et al (2016) Proc.B. 283: 20162157
Osteoglossiformes	Osteoglossiformes	Mormyridae	Brienomyrus	brachyistius		Brienomyrus_brachyistius	1		Mass	17	0.12694					Sukhum et al (2016) Proc.B. 283: 20162157
Osteoglossiformes	Osteoglossiformes	Mormyridae	Brienomyrus	brachyistius		Brienomyrus_brachyistius	1		Mass	15.55	0.12339					Sukhum et al (2016) Proc.B. 283: 20162157
Osteoglossiformes	Osteoglossiformes	Mormyridae	Brienomyrus	brachyistius		Brienomyrus_brachyistius	1		Mass	11.37	0.11005					Sukhum et al (2016) Proc.B. 283: 20162157
Osteoglossiformes	Osteoglossiformes	Mormyridae	Brienomyrus	brachyistius		Brienomyrus_brachyistius	1		Mass	14.21	0.11233					Sukhum et al (2016) Proc.B. 283: 20162157
Osteoglossiformes	Osteoglossiformes	Mormyridae	Brienomyrus	brachyistius		Brienomyrus_brachyistius	1		Mass	9.61	0.10376					Sukhum et al (2016) Proc.B. 283: 20162157
Osteoglossiformes	Osteoglossiformes	Mormyridae	Brienomyrus	brachyistius		Brienomyrus_brachyistius	1		Mass	6.22	0.11077					Sukhum et al (2016) Proc.B. 283: 20162157
Osteoglossiformes	Osteoglossiformes	Mormyridae	Brienomyrus	brachyistius		Brienomyrus_brachyistius	1		Mass	4.06	0.0512					This study
Osteoglossiformes	Osteoglossiformes	Mormyridae	Brienomyrus	brachyistius		Brienomyrus_brachyistius	1		Mass	7.535	0.073					This study
Osteoglossiformes	Osteoglossiformes	Mormyridae	Brienomyrus	brachyistius		Brienomyrus_brachyistius	1		Volume Conversion	4.945	0.0616					This study
Osteoglossiformes	Osteoglossiformes	Mormyridae	Brienomyrus	brachyistius		Brienomyrus_brachyistius	1		Volume Conversion	4.64	0.0826					This study
Osteoglossiformes	Osteoglossiformes	Mormyridae	Brienomyrus	brachyistius		Brienomyrus_brachyistius	1		Volume Conversion	11.77	0.1071					This study
Osteoglossiformes	Osteoglossiformes	Mormyridae	Campylomormyrus	numenius		Campylomormyrus_numenius	1		Mass	17.927	0.4403					Sukhum et al (2016) Proc.B. 283: 20162157
Osteoglossiformes	Osteoglossiformes	Mormyridae	Campylomormyrus	numenius		Campylomormyrus_numenius	1		Mass	2.222	0.1252					Sukhum et al (2016) Proc.B. 283: 20162157
Osteoglossiformes	Osteoglossiformes	Mormyridae	Campylomormyrus	phantasticus		Campylomormyrus_phantasticus	1		Mass	45.28	0.96891					Sukhum et al (2016) Proc.B. 283: 20162157
Osteoglossiformes	Osteoglossiformes	Mormyridae	Campylomormyrus	phantasticus		Campylomormyrus_phantasticus	1		Mass	32.5	0.753					Sukhum et al (2016) Proc.B. 283: 20162157
Osteoglossiformes	Osteoglossiformes	Mormyridae	Campylomormyrus	phantasticus		Campylomormyrus_phantasticus	1		Mass	15.41	0.50622					Sukhum et al (2016) Proc.B. 283: 20162157
Osteoglossiformes	Osteoglossiformes	Mormyridae	Campylomormyrus	spp		Campylomormyrus_spp	1		Volume Conversion	5.35	0.1573					This study
Osteoglossiformes	Osteoglossiformes	Mormyridae	Campylomormyrus	spp		Campylomormyrus_spp	1		Volume Conversion	4.89	0.2152					This study
Osteoglossiformes	Osteoglossiformes	Mormyridae	Campylomormyrus	spp		Campylomormyrus_spp	1		Volume Conversion	13.03	0.4467					This study
Osteoglossiformes	Osteoglossiformes	Mormyridae	Campylomormyrus	spp		Campylomormyrus_spp	1		Volume Conversion	7.237	0.318					This study
Osteoglossiformes	Osteoglossiformes	Mormyridae	Campylomormyrus	spp		Campylomormyrus_spp	1		Volume Conversion	9.29	0.4405					This study
Osteoglossiformes	Osteoglossiformes	Mormyridae	Campylomormyrus	tamandua		Campylomormyrus_tamandua	1		Mass	7.335	0.2517					Sukhum et al (2016) Proc.B. 283: 20162157
Osteoglossiformes	Osteoglossiformes	Mormyridae	Campylomormyrus	tamandua		Campylomormyrus_tamandua	1		Mass	4.165	0.166					Sukhum et al (2016) Proc.B. 283: 20162157
Osteoglossiformes	Osteoglossiformes	Mormyridae	Cyphomyrus	psittacus		Cyphomyrus_psittacus	1		Mass	10.19	0.23537					Sukhum et al (2016) Proc.B. 283: 20162157
Osteoglossiformes	Osteoglossiformes	Mormyridae	Cyphomyrus	psittacus		Cyphomyrus_psittacus	1		Mass	3.2	0.13327					Sukhum et al (2016) Proc.B. 283: 20162157
Osteoglossiformes	Osteoglossiformes	Mormyridae	Gnathonemus	echidnorhynchus		Gnathonemus_echidnorhynchus	1		Mass	8.59	0.24175					Sukhum et al (2016) Proc.B. 283: 20162157
Osteoglossiformes	Osteoglossiformes	Mormyridae	Gnathonemus	echidnorhynchus		Gnathonemus_echidnorhynchus	1		Mass	11.66	0.26565					Sukhum et al (2016) Proc.B. 283: 20162157
Osteoglossiformes	Osteoglossiformes	Mormyridae	Gnathonemus	echidnorhynchus		Gnathonemus_echidnorhynchus	1		Mass	11.45	0.20689					Sukhum et al (2016) Proc.B. 283: 20162157
Osteoglossiformes	Osteoglossiformes	Mormyridae	Gnathonemus	longibarbis		Gnathonemus_longibarbis	1	unknown	Mass	31.55	0.6549			unknown		Chapman LJ and Hulen KG (2001) J. Zool., Lond. 254: 461-472
Osteoglossiformes	Osteoglossiformes	Mormyridae	Gnathonemus	longibarbis		Gnathonemus_longibarbis	1	unknown	Mass	33.93	0.6584			unknown		Chapman LJ and Hulen KG (2001) J. Zool., Lond. 254: 461-472
Osteoglossiformes	Osteoglossiformes	Mormyridae	Gnathonemus	longibarbis		Gnathonemus_longibarbis	1	unknown	Mass	36.69	0.6549			unknown		Chapman LJ and Hulen KG (2001) J. Zool., Lond. 254: 461-472
Osteoglossiformes	Osteoglossiformes	Mormyridae	Gnathonemus	longibarbis		Gnathonemus_longibarbis	1	unknown	Mass	38.24	0.6941			unknown		Chapman LJ and Hulen KG (2001) J. Zool., Lond. 254: 461-472
Osteoglossiformes	Osteoglossiformes	Mormyridae	Gnathonemus	longibarbis		Gnathonemus_longibarbis	1	unknown	Mass	50.08	0.8851			unknown		Chapman LJ and Hulen KG (2001) J. Zool., Lond. 254: 461-472
Osteoglossiformes	Osteoglossiformes	Mormyridae	Gnathonemus	longibarbis		Gnathonemus_longibarbis	1	unknown	Mass	86.4	1.159			unknown		Chapman LJ and Hulen KG (2001) J. Zool., Lond. 254: 461-472
Osteoglossiformes	Osteoglossiformes	Mormyridae	Gnathonemus	longibarbis		Gnathonemus_longibarbis	1	unknown	Mass	98.9	1.3089			unknown		Chapman LJ and Hulen KG (2001) J. Zool., Lond. 254: 461-472
Osteoglossiformes	Osteoglossiformes	Mormyridae	Gnathonemus	petersii		Gnathonemus_petersii	5	unknown	Mass	26.09	0.53	18.18		unknown		Kaufman JA (2003) Curr. Anthropol. 44:705-707.
Osteoglossiformes	Osteoglossiformes	Mormyridae	Gnathonemus	petersii		Gnathonemus_petersii	12	unknown	Mass	5.85	0.177			unknown		Nilsson GE (1996) J. Exp. Biol. 199:603-607
Osteoglossiformes	Osteoglossiformes	Mormyridae	Gnathonemus	petersii		Gnathonemus_petersii	1		Mass	9.98	0.26298					Sukhum et al (2016) Proc.B. 283: 20162157
Osteoglossiformes	Osteoglossiformes	Mormyridae	Gnathonemus	petersii		Gnathonemus_petersii	1		Mass	8.8	0.25996					Sukhum et al (2016) Proc.B. 283: 20162157
Osteoglossiformes	Osteoglossiformes	Mormyridae	Gnathonemus	petersii		Gnathonemus_petersii	1		Mass	12.67	0.33282					Sukhum et al (2016) Proc.B. 283: 20162157
Osteoglossiformes	Osteoglossiformes	Mormyridae	Gnathonemus	petersii		Gnathonemus_petersii	1		Mass	10.65	0.29808					Sukhum et al (2016) Proc.B. 283: 20162157
Osteoglossiformes	Osteoglossiformes	Mormyridae	Gnathonemus	petersii		Gnathonemus_petersii	1		Mass	4.18	0.23269					Sukhum et al (2016) Proc.B. 283: 20162157
Osteoglossiformes	Osteoglossiformes	Mormyridae	Gnathonemus	petersii		Gnathonemus_petersii	1		Mass	4.13	0.18119					Sukhum et al (2016) Proc.B. 283: 20162157
Osteoglossiformes	Osteoglossiformes	Mormyridae	Gnathonemus	petersii		Gnathonemus_petersii	1		Mass	6.15	0.2064					Sukhum et al (2016) Proc.B. 283: 20162157
Osteoglossiformes	Osteoglossiformes	Mormyridae	Gnathonemus	petersii		Gnathonemus_petersii	1		Mass	5.21	0.0672					This study
Osteoglossiformes	Osteoglossiformes	Mormyridae	Gnathonemus	petersii		Gnathonemus_petersii	1		Mass	8.45	0.1861					This study
Osteoglossiformes	Osteoglossiformes	Mormyridae	Gnathonemus	petersii		Gnathonemus_petersii	1		Volume Conversion	6.22	0.1465					This study
Osteoglossiformes	Osteoglossiformes	Mormyridae	Gnathonemus	petersii		Gnathonemus_petersii	1		Volume Conversion	5.82	0.1322					This study
Osteoglossiformes	Osteoglossiformes	Mormyridae	Gnathonemus	petersii		Gnathonemus_petersii	1		Volume Conversion	15.53	0.3137					This study
Osteoglossiformes	Osteoglossiformes	Mormyridae	Hippopotamyrus	sp.		Hippopotamyrus_sp.	1		Mass	13.94	0.29097					Sukhum et al (2016) Proc.B. 283: 20162157
Osteoglossiformes	Osteoglossiformes	Mormyridae	Hippopotamyrus	sp.		Hippopotamyrus_sp.	1		Mass	8.7	0.25315					Sukhum et al (2016) Proc.B. 283: 20162157
Osteoglossiformes	Osteoglossiformes	Mormyridae	Hippopotamyrus	sp.		Hippopotamyrus_sp.	1		Mass	4.51	0.15148					Sukhum et al (2016) Proc.B. 283: 20162157
Osteoglossiformes	Osteoglossiformes	Mormyridae	Isichthys	henryi		Isichthys_henryi	1		Mass	10.53	0.10477					Sukhum et al (2016) Proc.B. 283: 20162157
Osteoglossiformes	Osteoglossiformes	Mormyridae	Isichthys	henryi		Isichthys_henryi	1		Mass	17.03	0.12193					Sukhum et al (2016) Proc.B. 283: 20162157
Osteoglossiformes	Osteoglossiformes	Mormyridae	Ivindomyrus	marchei		Ivindomyrus_marchei	1		Mass	14.04	0.37085					Sukhum et al (2016) Proc.B. 283: 20162157
Osteoglossiformes	Osteoglossiformes	Mormyridae	Ivindomyrus	marchei		Ivindomyrus_marchei	1		Mass	14.59	0.3417					Sukhum et al (2016) Proc.B. 283: 20162157
Osteoglossiformes	Osteoglossiformes	Mormyridae	Marcusenius	moorii		Marcusenius_moorii	1		Mass	5.99	0.20534					Sukhum et al (2016) Proc.B. 283: 20162157
Osteoglossiformes	Osteoglossiformes	Mormyridae	Marcusenius	moorii		Marcusenius_moorii	1		Mass	11.38	0.28574					Sukhum et al (2016) Proc.B. 283: 20162157
Osteoglossiformes	Osteoglossiformes	Mormyridae	Marcusenius	moorii		Marcusenius_moorii	1		Mass	12.52	0.28988					Sukhum et al (2016) Proc.B. 283: 20162157
Osteoglossiformes	Osteoglossiformes	Mormyridae	Marcusenius	moorii		Marcusenius_moorii	1		Mass	24.18	0.4226					Sukhum et al (2016) Proc.B. 283: 20162157
Osteoglossiformes	Osteoglossiformes	Mormyridae	Marcusenius	ntemensis		Marcusenius_ntemensis	1		Mass	42.83	0.55876					Sukhum et al (2016) Proc.B. 283: 20162157
Osteoglossiformes	Osteoglossiformes	Mormyridae	Marcusenius	ntemensis		Marcusenius_ntemensis	1		Mass	21.88	0.41957					Sukhum et al (2016) Proc.B. 283: 20162157
Osteoglossiformes	Osteoglossiformes	Mormyridae	Marcusenius	sanagaensis		Marcusenius_sanagaensis	1		Mass	18.12	0.40261					Sukhum et al (2016) Proc.B. 283: 20162157
Osteoglossiformes	Osteoglossiformes	Mormyridae	Marcusenius	sanagaensis		Marcusenius_sanagaensis	1		Mass	16.92	0.39597					Sukhum et al (2016) Proc.B. 283: 20162157
Osteoglossiformes	Osteoglossiformes	Mormyridae	Marcusenius	sanagaensis		Marcusenius_sanagaensis	1		Mass	25.3	0.53378					Sukhum et al (2016) Proc.B. 283: 20162157
Osteoglossiformes	Osteoglossiformes	Mormyridae	Marcusenius	victoriae		Marcusenius_victoriae	1	unknown	Mass	1.34	0.0829			unknown	Gnathonemus victoriae	Chapman LJ and Hulen KG (2001) J. Zool., Lond. 254: 461-472
Osteoglossiformes	Osteoglossiformes	Mormyridae	Marcusenius	victoriae		Marcusenius_victoriae	1	unknown	Mass	1.41	0.0907			unknown	Gnathonemus victoriae	Chapman LJ and Hulen KG (2001) J. Zool., Lond. 254: 461-472
Osteoglossiformes	Osteoglossiformes	Mormyridae	Marcusenius	victoriae		Marcusenius_victoriae	1	unknown	Mass	1.88	0.1085			unknown	Gnathonemus victoriae	Chapman LJ and Hulen KG (2001) J. Zool., Lond. 254: 461-472
Osteoglossiformes	Osteoglossiformes	Mormyridae	Marcusenius	victoriae		Marcusenius_victoriae	1	unknown	Mass	1.79	0.1169			unknown	Gnathonemus victoriae	Chapman LJ and Hulen KG (2001) J. Zool., Lond. 254: 461-472
Osteoglossiformes	Osteoglossiformes	Mormyridae	Marcusenius	victoriae		Marcusenius_victoriae	1	unknown	Mass	2.79	0.1232			unknown	Gnathonemus victoriae	Chapman LJ and Hulen KG (2001) J. Zool., Lond. 254: 461-472
Osteoglossiformes	Osteoglossiformes	Mormyridae	Marcusenius	victoriae		Marcusenius_victoriae	1	unknown	Mass	4.53	0.1491			unknown	Gnathonemus victoriae	Chapman LJ and Hulen KG (2001) J. Zool., Lond. 254: 461-472
Osteoglossiformes	Osteoglossiformes	Mormyridae	Marcusenius	victoriae		Marcusenius_victoriae	1	unknown	Mass	6.54	0.2113			unknown	Gnathonemus victoriae	Chapman LJ and Hulen KG (2001) J. Zool., Lond. 254: 461-472
Osteoglossiformes	Osteoglossiformes	Mormyridae	Marcusenius	victoriae		Marcusenius_victoriae	1	unknown	Mass	8.84	0.2437			unknown	Gnathonemus victoriae	Chapman LJ and Hulen KG (2001) J. Zool., Lond. 254: 461-472
Osteoglossiformes	Osteoglossiformes	Mormyridae	Marcusenius	victoriae		Marcusenius_victoriae	1	unknown	Mass	10.07	0.2542			unknown	Gnathonemus victoriae	Chapman LJ and Hulen KG (2001) J. Zool., Lond. 254: 461-472
Osteoglossiformes	Osteoglossiformes	Mormyridae	Marcusenius	victoriae		Marcusenius_victoriae	1	unknown	Mass	11.11	0.2917			unknown	Gnathonemus victoriae	Chapman LJ and Hulen KG (2001) J. Zool., Lond. 254: 461-472
Osteoglossiformes	Osteoglossiformes	Mormyridae	Marcusenius	victoriae		Marcusenius_victoriae	1	unknown	Mass	12.99	0.3043			unknown	Gnathonemus victoriae	Chapman LJ and Hulen KG (2001) J. Zool., Lond. 254: 461-472
Osteoglossiformes	Osteoglossiformes	Mormyridae	Mormyrops	anguilloides		Mormyrops_anguilloides	1		Mass	22.15	0.31406					Sukhum et al (2016) Proc.B. 283: 20162157
Osteoglossiformes	Osteoglossiformes	Mormyridae	Mormyrops	anguilloides		Mormyrops_anguilloides	1		Mass	39.35	0.41433					Sukhum et al (2016) Proc.B. 283: 20162157
Osteoglossiformes	Osteoglossiformes	Mormyridae	Mormyrops	nigircans		Mormyrops_nigircans	1		Mass	144.52	0.7857					Sukhum et al (2016) Proc.B. 283: 20162157
Osteoglossiformes	Osteoglossiformes	Mormyridae	Mormyrops	nigircans		Mormyrops_nigircans	1		Mass	41.26	0.43138					Sukhum et al (2016) Proc.B. 283: 20162157
Osteoglossiformes	Osteoglossiformes	Mormyridae	Mormyrops	zanclirostris		Mormyrops_zanclirostris	1		Mass	6.23	0.13923					Sukhum et al (2016) Proc.B. 283: 20162157
Osteoglossiformes	Osteoglossiformes	Mormyridae	Mormyrops	zanclirostris		Mormyrops_zanclirostris	1		Mass	24.07	0.27824					Sukhum et al (2016) Proc.B. 283: 20162157
Osteoglossiformes	Osteoglossiformes	Mormyridae	Mormyrops	zanclirostris		Mormyrops_zanclirostris	1		Mass	57.03	0.32967					Sukhum et al (2016) Proc.B. 283: 20162157
Osteoglossiformes	Osteoglossiformes	Mormyridae	Mormyrus	kannume		Mormyrus_kannume	1	unknown	Mass	131.52	2.1857			unknown		Chapman LJ and Hulen KG (2001) J. Zool., Lond. 254: 461-472
Osteoglossiformes	Osteoglossiformes	Mormyridae	Mormyrus	kannume		Mormyrus_kannume	1	unknown	Mass	180.51	2.9854			unknown		Chapman LJ and Hulen KG (2001) J. Zool., Lond. 254: 461-472
Osteoglossiformes	Osteoglossiformes	Mormyridae	Mormyrus	kannume		Mormyrus_kannume	1	unknown	Mass	204.5	3.0012			unknown		Chapman LJ and Hulen KG (2001) J. Zool., Lond. 254: 461-472
Osteoglossiformes	Osteoglossiformes	Mormyridae	Mormyrus	kannume		Mormyrus_kannume	1	unknown	Mass	208.93	2.2678			unknown		Chapman LJ and Hulen KG (2001) J. Zool., Lond. 254: 461-472
Osteoglossiformes	Osteoglossiformes	Mormyridae	Mormyrus	kannume		Mormyrus_kannume	1	unknown	Mass	236.7	2.0512			unknown		Chapman LJ and Hulen KG (2001) J. Zool., Lond. 254: 461-472
Osteoglossiformes	Osteoglossiformes	Mormyridae	Mormyrus	kannume		Mormyrus_kannume	1	unknown	Mass	239.17	2.3534			unknown		Chapman LJ and Hulen KG (2001) J. Zool., Lond. 254: 461-472
Osteoglossiformes	Osteoglossiformes	Mormyridae	Mormyrus	kannume		Mormyrus_kannume	1	unknown	Mass	277.97	2.7002			unknown		Chapman LJ and Hulen KG (2001) J. Zool., Lond. 254: 461-472
Osteoglossiformes	Osteoglossiformes	Mormyridae	Mormyrus	kannume		Mormyrus_kannume	1	unknown	Mass	318.13	3.4435			unknown		Chapman LJ and Hulen KG (2001) J. Zool., Lond. 254: 461-472
Osteoglossiformes	Osteoglossiformes	Mormyridae	Mormyrus	kannume		Mormyrus_kannume	1	unknown	Mass	342.06	3.7273			unknown		Chapman LJ and Hulen KG (2001) J. Zool., Lond. 254: 461-472
Osteoglossiformes	Osteoglossiformes	Mormyridae	Mormyrus	kannume		Mormyrus_kannume	1	unknown	Mass	432.12	4.3222			unknown		Chapman LJ and Hulen KG (2001) J. Zool., Lond. 254: 461-472
Osteoglossiformes	Osteoglossiformes	Mormyridae	Mormyrus	tapirus		Mormyrus_tapirus	1		Mass	165.11	2.71805					Sukhum et al (2016) Proc.B. 283: 20162157
Osteoglossiformes	Osteoglossiformes	Mormyridae	Mormyrus	tapirus		Mormyrus_tapirus	1		Mass	82.13	1.56156					Sukhum et al (2016) Proc.B. 283: 20162157
Osteoglossiformes	Osteoglossiformes	Mormyridae	Mormyrus	tapirus		Mormyrus_tapirus	1		Volume Conversion	7.33	0.2619					This study
Osteoglossiformes	Osteoglossiformes	Mormyridae	Mormyrus	tapirus		Mormyrus_tapirus	1		Volume Conversion	20.41	0.507					This study
Osteoglossiformes	Osteoglossiformes	Mormyridae	Mormyrus	tapirus		Mormyrus_tapirus	1		Volume Conversion	13.35	0.4041					This study
Osteoglossiformes	Osteoglossiformes	Mormyridae	Mormyrus	tapirus		Mormyrus_tapirus	1		Volume Conversion	30.17	0.5449					This study
Osteoglossiformes	Osteoglossiformes	Mormyridae	Mormyrus	tapirus		Mormyrus_tapirus	1		Volume Conversion	38.76	0.62					This study
Osteoglossiformes	Osteoglossiformes	Mormyridae	Mormyrus	tapirus		Mormyrus_tapirus	1		Volume Conversion	9.78	0.2529					This study
Osteoglossiformes	Osteoglossiformes	Mormyridae	Myomyrus	macrops		Myomyrus_macrops	1		Mass	12.41	0.33933					Sukhum et al (2016) Proc.B. 283: 20162157
Osteoglossiformes	Osteoglossiformes	Mormyridae	Myomyrus	macrops		Myomyrus_macrops	1		Mass	9.3	0.24536					Sukhum et al (2016) Proc.B. 283: 20162157
Osteoglossiformes	Osteoglossiformes	Mormyridae	Myomyrus	macrops		Myomyrus_macrops	1		Mass	24.85	0.43717					Sukhum et al (2016) Proc.B. 283: 20162157
Osteoglossiformes	Osteoglossiformes	Mormyridae	Paramormyrops	cabrae		Paramormyrops_cabrae	1		Mass	14.54	0.17127					Sukhum et al (2016) Proc.B. 283: 20162157
Osteoglossiformes	Osteoglossiformes	Mormyridae	Paramormyrops	cabrae		Paramormyrops_cabrae	1		Mass	10.42	0.17161					Sukhum et al (2016) Proc.B. 283: 20162157
Osteoglossiformes	Osteoglossiformes	Mormyridae	Paramormyrops	cabrae		Paramormyrops_cabrae	1		Mass	5.52	0.12723					Sukhum et al (2016) Proc.B. 283: 20162157
Osteoglossiformes	Osteoglossiformes	Mormyridae	Paramormyrops	gabonensis		Paramormyrops_gabonensis	1		Mass	13.8	0.17933					Sukhum et al (2016) Proc.B. 283: 20162157
Osteoglossiformes	Osteoglossiformes	Mormyridae	Paramormyrops	gabonensis		Paramormyrops_gabonensis	1		Mass	17.26	0.18566					Sukhum et al (2016) Proc.B. 283: 20162157
Osteoglossiformes	Osteoglossiformes	Mormyridae	Paramormyrops	magnostipes		Paramormyrops_magnostipes	1		Mass	10.23	0.20335					Sukhum et al (2016) Proc.B. 283: 20162157
Osteoglossiformes	Osteoglossiformes	Mormyridae	Paramormyrops	magnostipes		Paramormyrops_magnostipes	1		Mass	4.96	0.15329					Sukhum et al (2016) Proc.B. 283: 20162157
Osteoglossiformes	Osteoglossiformes	Mormyridae	Paramormyrops	magnostipes		Paramormyrops_magnostipes	1		Mass	10.71	0.18402					Sukhum et al (2016) Proc.B. 283: 20162157
Osteoglossiformes	Osteoglossiformes	Mormyridae	Paramormyrops	sp.		Paramormyrops_sp.	1		Mass	15.16	0.19213					Sukhum et al (2016) Proc.B. 283: 20162157
Osteoglossiformes	Osteoglossiformes	Mormyridae	Paramormyrops	sp.		Paramormyrops_sp.	1		Mass	32.95	0.27696					Sukhum et al (2016) Proc.B. 283: 20162157
Osteoglossiformes	Osteoglossiformes	Mormyridae	Paramormyrops	sp.		Paramormyrops_sp.	1		Mass	18.64	0.24739					Sukhum et al (2016) Proc.B. 283: 20162157
Osteoglossiformes	Osteoglossiformes	Mormyridae	Paramormyrops	sp.		Paramormyrops_sp.	1		Mass	13.13	0.19372					Sukhum et al (2016) Proc.B. 283: 20162157
Osteoglossiformes	Osteoglossiformes	Mormyridae	Paramormyrops	sp.		Paramormyrops_sp.	1		Mass	13.41	0.2225					Sukhum et al (2016) Proc.B. 283: 20162157
Osteoglossiformes	Osteoglossiformes	Mormyridae	Paramormyrops	sp.		Paramormyrops_sp.	1		Mass	22.92	0.3096					Sukhum et al (2016) Proc.B. 283: 20162157
Osteoglossiformes	Osteoglossiformes	Mormyridae	Paramormyrops	sp.		Paramormyrops_sp.	1		Mass	17.42	0.30527					Sukhum et al (2016) Proc.B. 283: 20162157
Osteoglossiformes	Osteoglossiformes	Mormyridae	Paramormyrops	sp.		Paramormyrops_sp.	1		Mass	20.09	0.24515					Sukhum et al (2016) Proc.B. 283: 20162157
Osteoglossiformes	Osteoglossiformes	Mormyridae	Petrocephalus	binotatus		Petrocephalus_binotatus	1		Mass	7.27	0.11322					Sukhum et al (2016) Proc.B. 283: 20162157
Osteoglossiformes	Osteoglossiformes	Mormyridae	Petrocephalus	binotatus		Petrocephalus_binotatus	1		Mass	7.31	0.10675					Sukhum et al (2016) Proc.B. 283: 20162157
Osteoglossiformes	Osteoglossiformes	Mormyridae	Petrocephalus	binotatus		Petrocephalus_binotatus	1		Mass	6.51	0.11408					Sukhum et al (2016) Proc.B. 283: 20162157
Osteoglossiformes	Osteoglossiformes	Mormyridae	Petrocephalus	binotatus		Petrocephalus_binotatus	1		Mass	7.49	0.10911					Sukhum et al (2016) Proc.B. 283: 20162157
Osteoglossiformes	Osteoglossiformes	Mormyridae	Petrocephalus	binotatus		Petrocephalus_binotatus	1		Mass	7.72	0.10599					Sukhum et al (2016) Proc.B. 283: 20162157
Osteoglossiformes	Osteoglossiformes	Mormyridae	Petrocephalus	catostoma		Petrocephalus_catostoma	1	unknown	Mass	0.34	0.0252			unknown		Chapman LJ and Hulen KG (2001) J. Zool., Lond. 254: 461-472
Osteoglossiformes	Osteoglossiformes	Mormyridae	Petrocephalus	catostoma		Petrocephalus_catostoma	1	unknown	Mass	0.7	0.0367			unknown		Chapman LJ and Hulen KG (2001) J. Zool., Lond. 254: 461-472
Osteoglossiformes	Osteoglossiformes	Mormyridae	Petrocephalus	catostoma		Petrocephalus_catostoma	1	unknown	Mass	0.96	0.0431			unknown		Chapman LJ and Hulen KG (2001) J. Zool., Lond. 254: 461-472
Osteoglossiformes	Osteoglossiformes	Mormyridae	Petrocephalus	catostoma		Petrocephalus_catostoma	1	unknown	Mass	1.52	0.0426			unknown		Chapman LJ and Hulen KG (2001) J. Zool., Lond. 254: 461-472
Osteoglossiformes	Osteoglossiformes	Mormyridae	Petrocephalus	catostoma		Petrocephalus_catostoma	1	unknown	Mass	2.11	0.0468			unknown		Chapman LJ and Hulen KG (2001) J. Zool., Lond. 254: 461-472
Osteoglossiformes	Osteoglossiformes	Mormyridae	Petrocephalus	catostoma		Petrocephalus_catostoma	1	unknown	Mass	2.38	0.0515			unknown		Chapman LJ and Hulen KG (2001) J. Zool., Lond. 254: 461-472
Osteoglossiformes	Osteoglossiformes	Mormyridae	Petrocephalus	catostoma		Petrocephalus_catostoma	1	unknown	Mass	2.78	0.0537			unknown		Chapman LJ and Hulen KG (2001) J. Zool., Lond. 254: 461-472
Osteoglossiformes	Osteoglossiformes	Mormyridae	Petrocephalus	catostoma		Petrocephalus_catostoma	1	unknown	Mass	2.85	0.0591			unknown		Chapman LJ and Hulen KG (2001) J. Zool., Lond. 254: 461-472
Osteoglossiformes	Osteoglossiformes	Mormyridae	Petrocephalus	catostoma		Petrocephalus_catostoma	1	unknown	Mass	3.22	0.0704			unknown		Chapman LJ and Hulen KG (2001) J. Zool., Lond. 254: 461-472
Osteoglossiformes	Osteoglossiformes	Mormyridae	Petrocephalus	christyi		Petrocephalus_christyi	1		Mass	11.66	0.1669					Sukhum et al (2016) Proc.B. 283: 20162157
Osteoglossiformes	Osteoglossiformes	Mormyridae	Petrocephalus	christyi		Petrocephalus_christyi	1		Mass	7.66	0.15039					Sukhum et al (2016) Proc.B. 283: 20162157
Osteoglossiformes	Osteoglossiformes	Mormyridae	Petrocephalus	christyi		Petrocephalus_christyi	1		Mass	1.71	0.05911					Sukhum et al (2016) Proc.B. 283: 20162157
Osteoglossiformes	Osteoglossiformes	Mormyridae	Petrocephalus	christyi		Petrocephalus_christyi	1		Mass	7.16	0.15392					Sukhum et al (2016) Proc.B. 283: 20162157
Osteoglossiformes	Osteoglossiformes	Mormyridae	Petrocephalus	micropthalmus		Petrocephalus_micropthalmus	1		Mass	7.64	0.06601					Sukhum et al (2016) Proc.B. 283: 20162157
Osteoglossiformes	Osteoglossiformes	Mormyridae	Petrocephalus	simus		Petrocephalus_simus	1		Mass	16.76	0.21171					Sukhum et al (2016) Proc.B. 283: 20162157
Osteoglossiformes	Osteoglossiformes	Mormyridae	Petrocephalus	tenuicauda		Petrocephalus_tenuicauda	1		Volume Conversion	2.831	0.062					This study
Osteoglossiformes	Osteoglossiformes	Mormyridae	Petrocephalus	tenuicauda		Petrocephalus_tenuicauda	1		Volume Conversion	0.849	0.0382					This study
Osteoglossiformes	Osteoglossiformes	Mormyridae	Petrocephalus	tenuicauda		Petrocephalus_tenuicauda	1		Volume Conversion	14.65	0.1221					This study
Osteoglossiformes	Osteoglossiformes	Mormyridae	Petrocephalus	tenuicauda		Petrocephalus_tenuicauda	1		Volume Conversion	7.34	0.1173					This study
Osteoglossiformes	Osteoglossiformes	Mormyridae	Petrocephalus	tenuicauda		Petrocephalus_tenuicauda	1		Volume Conversion	22.57	0.1651					This study
Osteoglossiformes	Osteoglossiformes	Mormyridae	Pollimyrus	adspersus		Pollimyrus_adspersus	1		Mass	4.045	0.0658					Sukhum et al (2016) Proc.B. 283: 20162157
Osteoglossiformes	Osteoglossiformes	Mormyridae	Pollimyrus	adspersus		Pollimyrus_adspersus	1		Mass	3.596	0.09					Sukhum et al (2016) Proc.B. 283: 20162157
Osteoglossiformes	Osteoglossiformes	Mormyridae	Pollimyrus	adspersus		Pollimyrus_adspersus	1		Mass	4.034	0.0933					Sukhum et al (2016) Proc.B. 283: 20162157
Osteoglossiformes	Osteoglossiformes	Mormyridae	Pollimyrus	adspersus		Pollimyrus_adspersus	1		Mass	2.395	0.0507					Sukhum et al (2016) Proc.B. 283: 20162157
Osteoglossiformes	Osteoglossiformes	Mormyridae	Pollimyrus	adspersus		Pollimyrus_adspersus	1		Mass	3.324	0.0882					Sukhum et al (2016) Proc.B. 283: 20162157
Osteoglossiformes	Osteoglossiformes	Mormyridae	Pollimyrus	adspersus		Pollimyrus_adspersus	1		Mass	3.149	0.0625					Sukhum et al (2016) Proc.B. 283: 20162157
Osteoglossiformes	Osteoglossiformes	Mormyridae	Pollimyrus	adspersus		Pollimyrus_adspersus	1		Mass	7.539	0.1303					Sukhum et al (2016) Proc.B. 283: 20162157
Osteoglossiformes	Osteoglossiformes	Mormyridae	Pollimyrus	isidori		Pollimyrus_isidori	1	unknown	Mass	2.07	0.115			unknown		Albert JS et al. (1999) Proceedings of the 5th Indo-Pacific Fish Conference (Seret B, Sire J-Y, eds), pp 647-656
Osteoglossiformes	Osteoglossiformes	Mormyridae	Stomatorhinus	ivindoensis		Stomatorhinus_ivindoensis	1		Mass	1.87	0.04884					Sukhum et al (2016) Proc.B. 283: 20162157
Osteoglossiformes	Osteoglossiformes	Mormyridae	Stomatorhinus	ivindoensis		Stomatorhinus_ivindoensis	1		Mass	1.54	0.0443					Sukhum et al (2016) Proc.B. 283: 20162157
Osteoglossiformes	Osteoglossiformes	Mormyridae	Stomatorhinus	ivindoensis		Stomatorhinus_ivindoensis	1		Mass	1.89	0.04573					Sukhum et al (2016) Proc.B. 283: 20162157
Osteoglossiformes	Osteoglossiformes	Mormyridae	Stomatorhinus	ivindoensis		Stomatorhinus_ivindoensis	1		Mass	2.13	0.04994					Sukhum et al (2016) Proc.B. 283: 20162157
Osteoglossiformes	Osteoglossiformes	Notopteridae	Chitala	chitala		Chitala_chitala	5	unknown	Mass	11.13	0.19	12.92		unknown		Kaufman JA (2003) Curr. Anthropol. 44:705-707.
Osteoglossiformes	Osteoglossiformes	Notopteridae	Chitala	ornata		Chitala_ornata	1		Mass	9.47	0.17852					Sukhum et al (2016) Proc.B. 283: 20162157
Osteoglossiformes	Osteoglossiformes	Notopteridae	Chitala	ornata		Chitala_ornata	1		Mass	5.24	0.12194					Sukhum et al (2016) Proc.B. 283: 20162157
Osteoglossiformes	Osteoglossiformes	Notopteridae	Chitala	ornata		Chitala_ornata	1		Mass	4	0.10905					Sukhum et al (2016) Proc.B. 283: 20162157
Osteoglossiformes	Osteoglossiformes	Notopteridae	Chitala	ornata		Chitala_ornata	1		Mass	4.47	0.10817					Sukhum et al (2016) Proc.B. 283: 20162157
Osteoglossiformes	Osteoglossiformes	Notopteridae	Chitala	ornata		Chitala_ornata	1		Mass	1.9	0.07054					Sukhum et al (2016) Proc.B. 283: 20162157
Osteoglossiformes	Osteoglossiformes	Notopteridae	Chitala	ornata		Chitala_ornata	1		Mass	1.66	0.05482					Sukhum et al (2016) Proc.B. 283: 20162157
Osteoglossiformes	Osteoglossiformes	Notopteridae	Chitala	ornata		Chitala_ornata	1		Volume Conversion	7.38	0.1548					This study
Osteoglossiformes	Osteoglossiformes	Notopteridae	Chitala	ornata		Chitala_ornata	1		Volume Conversion	10.43	0.1801					This study
Osteoglossiformes	Osteoglossiformes	Notopteridae	Chitala	ornata		Chitala_ornata	1		Volume Conversion	6.36	0.115					This study
Osteoglossiformes	Osteoglossiformes	Notopteridae	Chitala	ornata		Chitala_ornata	1		Volume Conversion	6.4	0.0932					This study
Osteoglossiformes	Osteoglossiformes	Notopteridae	Chitala	ornata		Chitala_ornata	1		Volume Conversion	15.45	0.155					This study
Osteoglossiformes	Osteoglossiformes	Notopteridae	Xenomystus	nigri		Xenomystus_nigri	1		Mass	11.59	0.13971					Sukhum et al (2016) Proc.B. 283: 20162157
Osteoglossiformes	Osteoglossiformes	Notopteridae	Xenomystus	nigri		Xenomystus_nigri	1		Mass	10.33	0.11021					Sukhum et al (2016) Proc.B. 283: 20162157
Osteoglossiformes	Osteoglossiformes	Notopteridae	Xenomystus	nigri		Xenomystus_nigri	1		Mass	4.79	0.06331					Sukhum et al (2016) Proc.B. 283: 20162157
Osteoglossiformes	Osteoglossiformes	Notopteridae	Xenomystus	nigri		Xenomystus_nigri	1		Mass	3.77	0.05895					Sukhum et al (2016) Proc.B. 283: 20162157
Osteoglossiformes	Osteoglossiformes	Notopteridae	Xenomystus	nigri		Xenomystus_nigri	1		Mass	8.62	0.10035					Sukhum et al (2016) Proc.B. 283: 20162157
Osteoglossiformes	Osteoglossiformes	Notopteridae	Xenomystus	nigri		Xenomystus_nigri	1		Mass	4.76	0.06866					Sukhum et al (2016) Proc.B. 283: 20162157
Osteoglossiformes	Osteoglossiformes	Notopteridae	Xenomystus	nigri		Xenomystus_nigri	1		Mass	8.25	0.10528					Sukhum et al (2016) Proc.B. 283: 20162157
Osteoglossiformes	Osteoglossiformes	Notopteridae	Xenomystus	nigri		Xenomystus_nigri	1		Mass	1.17	0.03635					Sukhum et al (2016) Proc.B. 283: 20162157
Osteoglossiformes	Osteoglossiformes	Notopteridae	Xenomystus	nigri		Xenomystus_nigri	1		Mass	4.07	0.0691					Sukhum et al (2016) Proc.B. 283: 20162157
Osteoglossiformes	Osteoglossiformes	Notopteridae	Xenomystus	nigri		Xenomystus_nigri	1		Mass	2.25	0.04743					Sukhum et al (2016) Proc.B. 283: 20162157
Osteoglossiformes	Osteoglossiformes	Notopteridae	Xenomystus	nigri		Xenomystus_nigri	1		Mass	3.94	0.06787					Sukhum et al (2016) Proc.B. 283: 20162157
Osteoglossiformes	Osteoglossiformes	Notopteridae	Xenomystus	nigri		Xenomystus_nigri	1		Mass	1.05	0.03504					Sukhum et al (2016) Proc.B. 283: 20162157
Osteoglossiformes	Osteoglossiformes	Notopteridae	Xenomystus	nigri		Xenomystus_nigri	1		Mass	3.36	0.05679					Sukhum et al (2016) Proc.B. 283: 20162157
Osteoglossiformes	Osteoglossiformes	Notopteridae	Xenomystus	nigri		Xenomystus_nigri	1		Mass	2.17	0.05202					Sukhum et al (2016) Proc.B. 283: 20162157
Osteoglossiformes	Osteoglossiformes	Notopteridae	Xenomystus	nigri		Xenomystus_nigri	1		Mass	2.61	0.04749					Sukhum et al (2016) Proc.B. 283: 20162157
Osteoglossiformes	Osteoglossiformes	Notopteridae	Xenomystus	nigri		Xenomystus_nigri	1		Volume Conversion	4.5	0.062					This study
Osteoglossiformes	Osteoglossiformes	Notopteridae	Xenomystus	nigri		Xenomystus_nigri	1		Volume Conversion	3.29	0.0391					This study
Osteoglossiformes	Osteoglossiformes	Notopteridae	Xenomystus	nigri		Xenomystus_nigri	1		Volume Conversion	3.93	0.0329					This study
Osteoglossiformes	Osteoglossiformes	Notopteridae	Xenomystus	nigri		Xenomystus_nigri	1		Volume Conversion	5.4	0.0424					This study
Osteoglossiformes	Osteoglossiformes	Notopteridae	Xenomystus	nigri		Xenomystus_nigri	1		Volume Conversion	8.14	0.0593					This study
Osteoglossiformes	Osteoglossiformes	Osteoglossidae	Osteoglossum	bicirrhosum		Osteoglossum_bicirrhosum	1	unknown	Mass	275	1.703			unknown		Bauchot R et al. (1994) Brain Res. 35: 143-151
Osteoglossiformes	Osteoglossiformes	Osteoglossidae	Scleropages	formosus		Scleropages_formosus	1	unknown	Mass	11	0.3			unknown		Albert JS et al. (1999) Proceedings of the 5th Indo-Pacific Fish Conference (Seret B, Sire J-Y, eds), pp 647-656
Osteoglossiformes	Osteoglossiformes	Osteoglossidae	Scleropages	formosus		Scleropages_formosus	1	unknown	Mass	13.8	0.266			unknown		Bauchot R et al. (1994) Brain Res. 35: 143-151
Osteoglossiformes	Osteoglossiformes	Osteoglossidae	Scleropages	jardinii		Scleropages_jardinii	3	unknown	Mass	17.3	0.3			unknown		Albert JS et al. (1999) Proceedings of the 5th Indo-Pacific Fish Conference (Seret B, Sire J-Y, eds), pp 647-656
Osteoglossiformes	Osteoglossiformes	Osteoglossidae	Scleropages	jardinii		Scleropages_jardinii	1	unknown	Mass	12.5	0.194			unknown		Bauchot R et al. (1994) Brain Res. 35: 143-151
Osteoglossiformes	Osteoglossiformes	Osteoglossidae	Scleropages	jardinii		Scleropages_jardinii	1	unknown	Mass	21.6	0.271			unknown		Bauchot R et al. (1994) Brain Res. 35: 143-151
Osteoglossiformes	Osteoglossiformes	Osteoglossidae	Scleropages	jardinii		Scleropages_jardinii	1	unknown	Mass	5.9	0.177			unknown		Bauchot R, Diagne M, Platel R, Ridet J-M, Bauchot M-L. in Fishbase. www.fishbase.org. date of access: Apr.-13-17
Osteoglossiformes	Osteoglossiformes	Osteoglossidae	Scleropages	jardinii		Scleropages_jardinii	1	unknown	Mass	12.5	0.2	10.5	12.3	unknown		Bauchot R, Diagne M, Platel R, Ridet J-M, Bauchot M-L. in Fishbase. www.fishbase.org. date of access: Apr.-13-17
Osteoglossiformes	Osteoglossiformes	Pantodontidae	Pantodon	buchholzi		Pantodon_buchholzi	1		Mass	4.73	0.03705					Sukhum et al (2016) Proc.B. 283: 20162157
Osteoglossiformes	Osteoglossiformes	Pantodontidae	Pantodon	buchholzi		Pantodon_buchholzi	1		Mass	2.75	0.02738					Sukhum et al (2016) Proc.B. 283: 20162157
Osteoglossiformes	Osteoglossiformes	Pantodontidae	Pantodon	buchholzi		Pantodon_buchholzi	1		Mass	1.46	0.02247					Sukhum et al (2016) Proc.B. 283: 20162157
Osteoglossiformes	Osteoglossiformes	Pantodontidae	Pantodon	buchholzi		Pantodon_buchholzi	1		Mass	3.64	0.03623					Sukhum et al (2016) Proc.B. 283: 20162157
Osteoglossiformes	Osteoglossiformes	Pantodontidae	Pantodon	buchholzi		Pantodon_buchholzi	1		Mass	3.53	0.03525					Sukhum et al (2016) Proc.B. 283: 20162157
Osteoglossiformes	Osteoglossiformes	Pantodontidae	Pantodon	buchholzi		Pantodon_buchholzi	1		Mass	3.29	0.03563					Sukhum et al (2016) Proc.B. 283: 20162157
Osteoglossiformes	Osteoglossiformes	Pantodontidae	Pantodon	buchholzi		Pantodon_buchholzi	1		Mass	1.54	0.02487					Sukhum et al (2016) Proc.B. 283: 20162157
Osteoglossiformes	Osteoglossiformes	Pantodontidae	Pantodon	buchholzi		Pantodon_buchholzi	1		Mass	2.07	0.02695					Sukhum et al (2016) Proc.B. 283: 20162157
Osteoglossiformes	Osteoglossiformes	Pantodontidae	Pantodon	buchholzi		Pantodon_buchholzi	1		Mass	1.42	0.02024					Sukhum et al (2016) Proc.B. 283: 20162157
Osteoglossiformes	Osteoglossiformes	Pantodontidae	Pantodon	buchholzi		Pantodon_buchholzi	1		Mass	1.3	0.02119					Sukhum et al (2016) Proc.B. 283: 20162157
Osteoglossiformes	Osteoglossiformes	Pantodontidae	Pantodon	buchholzi		Pantodon_buchholzi	1		Mass	3.81	0.03672					Sukhum et al (2016) Proc.B. 283: 20162157
Osteoglossiformes	Osteoglossiformes	Pantodontidae	Pantodon	buchholzi		Pantodon_buchholzi	1		Volume Conversion	7.78	0.0345					This study
Osteoglossiformes	Osteoglossiformes	Pantodontidae	Pantodon	buchholzi		Pantodon_buchholzi	1		Volume Conversion	7.27	0.0415					This study
Osteoglossiformes	Osteoglossiformes	Pantodontidae	Pantodon	buchholzi		Pantodon_buchholzi	1		Volume Conversion	10.49	0.0361					This study
Osteoglossiformes	Osteoglossiformes	Pantodontidae	Pantodon	buchholzi		Pantodon_buchholzi	1		Volume Conversion	10.76	0.0385					This study
Osteoglossiformes	Osteoglossiformes	Pantodontidae	Pantodon	buchholzi		Pantodon_buchholzi	1		Volume Conversion	10.16	0.0413					This study
Acanthuriformes	Perciformes	Acanthuridae	Acanthurus	achilles		Acanthurus_achilles	1	unknown	Mass	140	0.489			unknown		Bauchot R, Diagne M, Platel R, Ridet J-M, Bauchot M-L. in Fishbase. www.fishbase.org. date of access: Apr.-13-17
Acanthuriformes	Perciformes	Acanthuridae	Acanthurus	achilles		Acanthurus_achilles	1	unknown	Mass	330	0.64			unknown		Bauchot R, Diagne M, Platel R, Ridet J-M, Bauchot M-L. in Fishbase. www.fishbase.org. date of access: Apr.-13-17
Acanthuriformes	Perciformes	Acanthuridae	Acanthurus	bahianus		Acanthurus_bahianus	1	unknown	Mass	66.9	0.402			unknown		Bauchot R, Diagne M, Platel R, Ridet J-M, Bauchot M-L. in Fishbase. www.fishbase.org. date of access: Apr.-13-17
Acanthuriformes	Perciformes	Acanthuridae	Acanthurus	bahianus		Acanthurus_bahianus	1	unknown	Mass	145	0.488			unknown		Bauchot R, Diagne M, Platel R, Ridet J-M, Bauchot M-L. in Fishbase. www.fishbase.org. date of access: Apr.-13-17
Acanthuriformes	Perciformes	Acanthuridae	Acanthurus	bahianus		Acanthurus_bahianus	1	unknown	Mass	107	0.405			unknown		Iglesias TL et al. (2015) J. Evol. Biol. 28:1080-1090
Acanthuriformes	Perciformes	Acanthuridae	Acanthurus	chirurgus		Acanthurus_chirurgus	1	unknown	Mass	35	0.218			unknown		Iglesias TL et al. (2015) J. Evol. Biol. 28:1080-1090
Acanthuriformes	Perciformes	Acanthuridae	Acanthurus	coeruleus		Acanthurus_coeruleus	1	unknown	Mass	118	0.49			unknown		Iglesias TL et al. (2015) J. Evol. Biol. 28:1080-1090
Acanthuriformes	Perciformes	Acanthuridae	Acanthurus	dussumieri		Acanthurus_dussumieri	1	unknown	Mass	185	0.505			unknown		Bauchot R, Diagne M, Platel R, Ridet J-M, Bauchot M-L. in Fishbase. www.fishbase.org. date of access: Apr.-13-17
Acanthuriformes	Perciformes	Acanthuridae	Acanthurus	dussumieri		Acanthurus_dussumieri	1	unknown	Mass	229	0.557			unknown		Bauchot R, Diagne M, Platel R, Ridet J-M, Bauchot M-L. in Fishbase. www.fishbase.org. date of access: Apr.-13-17
Acanthuriformes	Perciformes	Acanthuridae	Acanthurus	dussumieri		Acanthurus_dussumieri	1	unknown	Mass	940	0.956			unknown		Bauchot R, Diagne M, Platel R, Ridet J-M, Bauchot M-L. in Fishbase. www.fishbase.org. date of access: Apr.-13-17
Acanthuriformes	Perciformes	Acanthuridae	Acanthurus	guttatus		Acanthurus_guttatus	1	unknown	Mass	288	0.662			unknown		Bauchot R, Diagne M, Platel R, Ridet J-M, Bauchot M-L. in Fishbase. www.fishbase.org. date of access: Apr.-13-17
Acanthuriformes	Perciformes	Acanthuridae	Acanthurus	leucopareius		Acanthurus_leucopareius	1	unknown	Mass	227	0.519			unknown		Bauchot R, Diagne M, Platel R, Ridet J-M, Bauchot M-L. in Fishbase. www.fishbase.org. date of access: Apr.-13-17
Acanthuriformes	Perciformes	Acanthuridae	Acanthurus	leucosternon		Acanthurus_leucosternon	1	unknown	Mass	310	0.596			unknown		Bauchot R, Diagne M, Platel R, Ridet J-M, Bauchot M-L. in Fishbase. www.fishbase.org. date of access: Apr.-13-17
Acanthuriformes	Perciformes	Acanthuridae	Acanthurus	lineatus		Acanthurus_lineatus	1	unknown	Mass	257	0.549			unknown		Bauchot R, Diagne M, Platel R, Ridet J-M, Bauchot M-L. in Fishbase. www.fishbase.org. date of access: Apr.-13-17
Acanthuriformes	Perciformes	Acanthuridae	Acanthurus	lineatus		Acanthurus_lineatus	1	unknown	Mass	300	0.579			unknown		Bauchot R, Diagne M, Platel R, Ridet J-M, Bauchot M-L. in Fishbase. www.fishbase.org. date of access: Apr.-13-17
Acanthuriformes	Perciformes	Acanthuridae	Acanthurus	mata		Acanthurus_mata	1	unknown	Mass	27	0.202			unknown		Bauchot R, Diagne M, Platel R, Ridet J-M, Bauchot M-L. in Fishbase. www.fishbase.org. date of access: Apr.-13-17
Acanthuriformes	Perciformes	Acanthuridae	Acanthurus	mata		Acanthurus_mata	1	unknown	Mass	90.6	0.378			unknown		Bauchot R, Diagne M, Platel R, Ridet J-M, Bauchot M-L. in Fishbase. www.fishbase.org. date of access: Apr.-13-17
Acanthuriformes	Perciformes	Acanthuridae	Acanthurus	mata		Acanthurus_mata	1	unknown	Mass	113	0.359			unknown		Bauchot R, Diagne M, Platel R, Ridet J-M, Bauchot M-L. in Fishbase. www.fishbase.org. date of access: Apr.-13-17
Acanthuriformes	Perciformes	Acanthuridae	Acanthurus	mata		Acanthurus_mata	1	unknown	Mass	213	0.466			unknown		Bauchot R, Diagne M, Platel R, Ridet J-M, Bauchot M-L. in Fishbase. www.fishbase.org. date of access: Apr.-13-17
Acanthuriformes	Perciformes	Acanthuridae	Acanthurus	mata		Acanthurus_mata	1	unknown	Mass	282	0.534			unknown		Bauchot R, Diagne M, Platel R, Ridet J-M, Bauchot M-L. in Fishbase. www.fishbase.org. date of access: Apr.-13-17
Acanthuriformes	Perciformes	Acanthuridae	Acanthurus	mata		Acanthurus_mata	1	unknown	Mass	810	0.964			unknown		Bauchot R, Diagne M, Platel R, Ridet J-M, Bauchot M-L. in Fishbase. www.fishbase.org. date of access: Apr.-13-17
Acanthuriformes	Perciformes	Acanthuridae	Acanthurus	nigricans		Acanthurus_nigricans	1	unknown	Mass	100	0.457			unknown		Bauchot R, Diagne M, Platel R, Ridet J-M, Bauchot M-L. in Fishbase. www.fishbase.org. date of access: Apr.-13-17
Acanthuriformes	Perciformes	Acanthuridae	Acanthurus	nigricans		Acanthurus_nigricans	1	unknown	Mass	428	0.638			unknown		Bauchot R, Diagne M, Platel R, Ridet J-M, Bauchot M-L. in Fishbase. www.fishbase.org. date of access: Apr.-13-17
Acanthuriformes	Perciformes	Acanthuridae	Acanthurus	nigricauda		Acanthurus_nigricauda	1	unknown	Mass	265	0.4			unknown		Bauchot R, Diagne M, Platel R, Ridet J-M, Bauchot M-L. in Fishbase. www.fishbase.org. date of access: Apr.-13-17
Acanthuriformes	Perciformes	Acanthuridae	Acanthurus	nigrofuscus		Acanthurus_nigrofuscus	1	unknown	Mass	12.7	0.118			unknown		Bauchot R, Diagne M, Platel R, Ridet J-M, Bauchot M-L. in Fishbase. www.fishbase.org. date of access: Apr.-13-17
Acanthuriformes	Perciformes	Acanthuridae	Acanthurus	nigrofuscus		Acanthurus_nigrofuscus	1	unknown	Mass	17	0.198			unknown		Bauchot R, Diagne M, Platel R, Ridet J-M, Bauchot M-L. in Fishbase. www.fishbase.org. date of access: Apr.-13-17
Acanthuriformes	Perciformes	Acanthuridae	Acanthurus	nigrofuscus		Acanthurus_nigrofuscus	1	unknown	Mass	73	0.251			unknown		Bauchot R, Diagne M, Platel R, Ridet J-M, Bauchot M-L. in Fishbase. www.fishbase.org. date of access: Apr.-13-17
Acanthuriformes	Perciformes	Acanthuridae	Acanthurus	nigrofuscus		Acanthurus_nigrofuscus	1	unknown	Mass	93	0.303			unknown		Bauchot R, Diagne M, Platel R, Ridet J-M, Bauchot M-L. in Fishbase. www.fishbase.org. date of access: Apr.-13-17
Acanthuriformes	Perciformes	Acanthuridae	Acanthurus	nigroris		Acanthurus_nigroris	1	unknown	Mass	98.7	0.373			unknown		Bauchot R, Diagne M, Platel R, Ridet J-M, Bauchot M-L. in Fishbase. www.fishbase.org. date of access: Apr.-13-17
Acanthuriformes	Perciformes	Acanthuridae	Acanthurus	olivaceus		Acanthurus_olivaceus	1	unknown	Mass	244	0.602			unknown		Bauchot R, Diagne M, Platel R, Ridet J-M, Bauchot M-L. in Fishbase. www.fishbase.org. date of access: Apr.-13-17
Acanthuriformes	Perciformes	Acanthuridae	Acanthurus	olivaceus		Acanthurus_olivaceus	1	unknown	Mass	298	0.631			unknown		Bauchot R, Diagne M, Platel R, Ridet J-M, Bauchot M-L. in Fishbase. www.fishbase.org. date of access: Apr.-13-17
Acanthuriformes	Perciformes	Acanthuridae	Acanthurus	olivaceus		Acanthurus_olivaceus	1	unknown	Mass	347	0.643			unknown		Bauchot R, Diagne M, Platel R, Ridet J-M, Bauchot M-L. in Fishbase. www.fishbase.org. date of access: Apr.-13-17
Acanthuriformes	Perciformes	Acanthuridae	Acanthurus	pyroferus		Acanthurus_pyroferus	1	unknown	Mass	154	0.404			unknown		Bauchot R, Diagne M, Platel R, Ridet J-M, Bauchot M-L. in Fishbase. www.fishbase.org. date of access: Apr.-13-17
Acanthuriformes	Perciformes	Acanthuridae	Acanthurus	thompsoni		Acanthurus_thompsoni	1	unknown	Mass	125	0.344			unknown		Bauchot R, Diagne M, Platel R, Ridet J-M, Bauchot M-L. in Fishbase. www.fishbase.org. date of access: Apr.-13-17
Acanthuriformes	Perciformes	Acanthuridae	Acanthurus	thompsoni		Acanthurus_thompsoni	1	unknown	Mass	173	0.392			unknown		Bauchot R, Diagne M, Platel R, Ridet J-M, Bauchot M-L. in Fishbase. www.fishbase.org. date of access: Apr.-13-17
Acanthuriformes	Perciformes	Acanthuridae	Acanthurus	triostegus		Acanthurus_triostegus	1	unknown	Mass	116	0.255			unknown		Bauchot R, Diagne M, Platel R, Ridet J-M, Bauchot M-L. in Fishbase. www.fishbase.org. date of access: Apr.-13-17
Acanthuriformes	Perciformes	Acanthuridae	Acanthurus	triostegus		Acanthurus_triostegus	1	unknown	Mass	30.5	0.202			unknown		Bauchot R, Diagne M, Platel R, Ridet J-M, Bauchot M-L. in Fishbase. www.fishbase.org. date of access: Apr.-13-17
Acanthuriformes	Perciformes	Acanthuridae	Acanthurus	triostegus		Acanthurus_triostegus	1	unknown	Mass	76	0.245			unknown		Bauchot R, Diagne M, Platel R, Ridet J-M, Bauchot M-L. in Fishbase. www.fishbase.org. date of access: Apr.-13-17
Acanthuriformes	Perciformes	Acanthuridae	Acanthurus	triostegus		Acanthurus_triostegus	1	unknown	Mass	77	0.275			unknown		Bauchot R, Diagne M, Platel R, Ridet J-M, Bauchot M-L. in Fishbase. www.fishbase.org. date of access: Apr.-13-17
Acanthuriformes	Perciformes	Acanthuridae	Acanthurus	triostegus		Acanthurus_triostegus	2	unknown	Mass	64.18	0.271			unknown		Iglesias TL et al. (2015) J. Evol. Biol. 28:1080-1090
Acanthuriformes	Perciformes	Acanthuridae	Acanthurus	xanthopterus		Acanthurus_xanthopterus	1	unknown	Mass	25.1	0.188			unknown		Bauchot R, Diagne M, Platel R, Ridet J-M, Bauchot M-L. in Fishbase. www.fishbase.org. date of access: Apr.-13-17
Acanthuriformes	Perciformes	Acanthuridae	Acanthurus	xanthopterus		Acanthurus_xanthopterus	1	unknown	Mass	39.9	0.277			unknown		Bauchot R, Diagne M, Platel R, Ridet J-M, Bauchot M-L. in Fishbase. www.fishbase.org. date of access: Apr.-13-17
Acanthuriformes	Perciformes	Acanthuridae	Acanthurus	xanthopterus		Acanthurus_xanthopterus	1	unknown	Mass	89.5	0.304			unknown		Bauchot R, Diagne M, Platel R, Ridet J-M, Bauchot M-L. in Fishbase. www.fishbase.org. date of access: Apr.-13-17
Acanthuriformes	Perciformes	Acanthuridae	Acanthurus	xanthopterus		Acanthurus_xanthopterus	1	unknown	Mass	307	0.608			unknown		Bauchot R, Diagne M, Platel R, Ridet J-M, Bauchot M-L. in Fishbase. www.fishbase.org. date of access: Apr.-13-17
Acanthuriformes	Perciformes	Acanthuridae	Acanthurus	xanthopterus		Acanthurus_xanthopterus	1	unknown	Mass	322	0.547			unknown		Bauchot R, Diagne M, Platel R, Ridet J-M, Bauchot M-L. in Fishbase. www.fishbase.org. date of access: Apr.-13-17
Acanthuriformes	Perciformes	Acanthuridae	Acanthurus	xanthopterus		Acanthurus_xanthopterus	1	unknown	Mass	3280	1.35			unknown		Bauchot R, Diagne M, Platel R, Ridet J-M, Bauchot M-L. in Fishbase. www.fishbase.org. date of access: Apr.-13-17
Acanthuriformes	Perciformes	Acanthuridae	Ctenochaetus	binotatus		Ctenochaetus_binotatus	1	unknown	Mass	40	0.247	9.4	13	unknown		Bauchot R, Diagne M, Platel R, Ridet J-M, Bauchot M-L. in Fishbase. www.fishbase.org. date of access: Apr.-13-17
Acanthuriformes	Perciformes	Acanthuridae	Ctenochaetus	binotatus		Ctenochaetus_binotatus	1	unknown	Mass	57	0.243	11	15	unknown		Bauchot R, Diagne M, Platel R, Ridet J-M, Bauchot M-L. in Fishbase. www.fishbase.org. date of access: Apr.-13-17
Acanthuriformes	Perciformes	Acanthuridae	Ctenochaetus	striatus		Ctenochaetus_striatus	1	unknown	Mass	156	0.333	15.5	20.5	Adult		Bauchot R, Diagne M, Platel R, Ridet J-M, Bauchot M-L. in Fishbase. www.fishbase.org. date of access: Apr.-13-17
Acanthuriformes	Perciformes	Acanthuridae	Ctenochaetus	striatus		Ctenochaetus_striatus	1	unknown	Mass	219	0.396	17.5	22.5	Adult		Bauchot R, Diagne M, Platel R, Ridet J-M, Bauchot M-L. in Fishbase. www.fishbase.org. date of access: Apr.-13-17
Acanthuriformes	Perciformes	Acanthuridae	Ctenochaetus	striatus		Ctenochaetus_striatus	3	unknown	Mass	94.8	0.272			unknown		Iglesias TL et al. (2015) J. Evol. Biol. 28:1080-1090
Acanthuriformes	Perciformes	Acanthuridae	Ctenochaetus	strigosus		Ctenochaetus_strigosus	1	unknown	Mass	113	0.3	13.8	17	Adult		Bauchot R, Diagne M, Platel R, Ridet J-M, Bauchot M-L. in Fishbase. www.fishbase.org. date of access: Apr.-13-17
Acanthuriformes	Perciformes	Acanthuridae	Naso	brevirostris		Naso_brevirostris	1	unknown	Mass	610	1.122	37.7	40.5	unknown		Bauchot R, Diagne M, Platel R, Ridet J-M, Bauchot M-L. in Fishbase. www.fishbase.org. date of access: Apr.-13-17
Acanthuriformes	Perciformes	Acanthuridae	Naso	hexacanthus		Naso_hexacanthus	1	unknown	Mass	198	0.666	21	24	unknown		Bauchot R, Diagne M, Platel R, Ridet J-M, Bauchot M-L. in Fishbase. www.fishbase.org. date of access: Apr.-13-17
Acanthuriformes	Perciformes	Acanthuridae	Naso	lituratus		Naso_lituratus	1	unknown	Mass	183	0.79	22.5		unknown		Bauchot R, Diagne M, Platel R, Ridet J-M, Bauchot M-L. in Fishbase. www.fishbase.org. date of access: Apr.-13-17
Acanthuriformes	Perciformes	Acanthuridae	Naso	lituratus		Naso_lituratus	1	unknown	Mass	279	0.846			unknown		Bauchot R, Diagne M, Platel R, Ridet J-M, Bauchot M-L. in Fishbase. www.fishbase.org. date of access: Apr.-13-17
Acanthuriformes	Perciformes	Acanthuridae	Naso	lituratus		Naso_lituratus	1	unknown	Mass	355	0.764	22	26.7	unknown		Bauchot R, Diagne M, Platel R, Ridet J-M, Bauchot M-L. in Fishbase. www.fishbase.org. date of access: Apr.-13-17
Acanthuriformes	Perciformes	Acanthuridae	Naso	lituratus		Naso_lituratus	1	unknown	Mass	790	0.733	28.5		unknown		Bauchot R, Diagne M, Platel R, Ridet J-M, Bauchot M-L. in Fishbase. www.fishbase.org. date of access: Apr.-13-17
Acanthuriformes	Perciformes	Acanthuridae	Naso	unicornis		Naso_unicornis	1	unknown	Mass	340	0.665	20.5	25.5	unknown		Bauchot R, Diagne M, Platel R, Ridet J-M, Bauchot M-L. in Fishbase. www.fishbase.org. date of access: Apr.-13-17
Acanthuriformes	Perciformes	Acanthuridae	Naso	vlamingii		Naso_vlamingii	1	unknown	Mass	1220	1.352	37	53	unknown		Bauchot R, Diagne M, Platel R, Ridet J-M, Bauchot M-L. in Fishbase. www.fishbase.org. date of access: Apr.-13-17
Acanthuriformes	Perciformes	Acanthuridae	Zebrasoma	flavescens		Zebrasoma_flavescens	1	unknown	Mass	33.5	0.193	10	11.7	unknown		Bauchot R, Diagne M, Platel R, Ridet J-M, Bauchot M-L. in Fishbase. www.fishbase.org. date of access: Apr.-13-17
Acanthuriformes	Perciformes	Acanthuridae	Zebrasoma	flavescens		Zebrasoma_flavescens	1	unknown	Mass	61	0.289	11.2	13.6	unknown		Bauchot R, Diagne M, Platel R, Ridet J-M, Bauchot M-L. in Fishbase. www.fishbase.org. date of access: Apr.-13-17
Acanthuriformes	Perciformes	Acanthuridae	Zebrasoma	flavescens		Zebrasoma_flavescens	1	unknown	Mass	88.5	0.283	13.5	15.7	unknown		Bauchot R, Diagne M, Platel R, Ridet J-M, Bauchot M-L. in Fishbase. www.fishbase.org. date of access: Apr.-13-17
Acanthuriformes	Perciformes	Acanthuridae	Zebrasoma	scopas		Zebrasoma_scopas	1	unknown	Mass	34.4	0.214			unknown		Bauchot R, Diagne M, Platel R, Ridet J-M, Bauchot M-L. in Fishbase. www.fishbase.org. date of access: Apr.-13-17
Acanthuriformes	Perciformes	Acanthuridae	Zebrasoma	scopas		Zebrasoma_scopas	1	unknown	Mass	81.3	0.282	11.5	14	unknown		Bauchot R, Diagne M, Platel R, Ridet J-M, Bauchot M-L. in Fishbase. www.fishbase.org. date of access: Apr.-13-17
Acanthuriformes	Perciformes	Acanthuridae	Zebrasoma	velifer		Zebrasoma_velifer	1	unknown	Mass	125	0.345	13.5	17.2	unknown		Bauchot R, Diagne M, Platel R, Ridet J-M, Bauchot M-L. in Fishbase. www.fishbase.org. date of access: Apr.-13-17
Acanthuriformes	Perciformes	Acanthuridae	Zebrasoma	velifer		Zebrasoma_velifer	1	unknown	Mass	310	0.495	20.3	23.8	unknown		Bauchot R, Diagne M, Platel R, Ridet J-M, Bauchot M-L. in Fishbase. www.fishbase.org. date of access: Apr.-13-17
Acanthuriformes	Perciformes	Acanthuridae	Zebrasoma	velifer		Zebrasoma_velifer	1	unknown	Mass	680	0.655	25.4	31	unknown		Bauchot R, Diagne M, Platel R, Ridet J-M, Bauchot M-L. in Fishbase. www.fishbase.org. date of access: Apr.-13-17
Acanthuriformes	Perciformes	Acanthuridae	Zebrasoma	velifer		Zebrasoma_velifer	1	unknown	Mass	680	0.662	24.5	32	unknown		Bauchot R, Diagne M, Platel R, Ridet J-M, Bauchot M-L. in Fishbase. www.fishbase.org. date of access: Apr.-13-17
Perciformes	Perciformes	Ammodytidae	Ammodytes	marinus		Ammodytes_marinus	1	unknown	Mass	4.3	0.015			unknown		Bauchot R, Diagne M, Platel R, Ridet J-M, Bauchot M-L. in Fishbase. www.fishbase.org. date of access: Apr.-13-17
Perciformes	Perciformes	Ammodytidae	Ammodytes	marinus		Ammodytes_marinus	1	unknown	Mass	4.7	0.016			unknown		Bauchot R, Diagne M, Platel R, Ridet J-M, Bauchot M-L. in Fishbase. www.fishbase.org. date of access: Apr.-13-17
Perciformes	Perciformes	Ammodytidae	Ammodytes	marinus		Ammodytes_marinus	1	unknown	Mass	100	0.12			unknown		Bauchot R, Diagne M, Platel R, Ridet J-M, Bauchot M-L. in Fishbase. www.fishbase.org. date of access: Apr.-13-17
Perciformes	Perciformes	Ammodytidae	Hyperoplus	lanceolatus		Hyperoplus_lanceolatus	1	unknown	Mass	13.5	0.0449			unknown		Bauchot R, Diagne M, Platel R, Ridet J-M, Bauchot M-L. in Fishbase. www.fishbase.org. date of access: Apr.-13-17
Perciformes	Perciformes	Ammodytidae	Hyperoplus	lanceolatus		Hyperoplus_lanceolatus	1	unknown	Mass	19.1	0.0499			unknown		Bauchot R, Diagne M, Platel R, Ridet J-M, Bauchot M-L. in Fishbase. www.fishbase.org. date of access: Apr.-13-17
Scorpaeniformes	Perciformes	Anarhichadidae	Anarhichas	denticulatus		Anarhichas_denticulatus	1	unknown	Mass	2900	0.272			unknown		Bauchot R, Diagne M, Platel R, Ridet J-M, Bauchot M-L. in Fishbase. www.fishbase.org. date of access: Apr.-13-17
Scorpaeniformes	Perciformes	Anarhichadidae	Anarhichas	denticulatus		Anarhichas_denticulatus	1	unknown	Mass	3500	0.301			unknown		Bauchot R, Diagne M, Platel R, Ridet J-M, Bauchot M-L. in Fishbase. www.fishbase.org. date of access: Apr.-13-17
Scorpaeniformes	Perciformes	Anarhichadidae	Anarhichas	denticulatus		Anarhichas_denticulatus	1	unknown	Mass	6000	0.346			unknown		Bauchot R, Diagne M, Platel R, Ridet J-M, Bauchot M-L. in Fishbase. www.fishbase.org. date of access: Apr.-13-17
Scorpaeniformes	Perciformes	Anarhichadidae	Anarhichas	denticulatus		Anarhichas_denticulatus	1	unknown	Mass	6700	0.434			unknown		Bauchot R, Diagne M, Platel R, Ridet J-M, Bauchot M-L. in Fishbase. www.fishbase.org. date of access: Apr.-13-17
Scorpaeniformes	Perciformes	Anarhichadidae	Anarhichas	denticulatus		Anarhichas_denticulatus	1	unknown	Mass	10500	0.637			unknown		Bauchot R, Diagne M, Platel R, Ridet J-M, Bauchot M-L. in Fishbase. www.fishbase.org. date of access: Apr.-13-17
Scorpaeniformes	Perciformes	Anarhichadidae	Anarhichas	lupus		Anarhichas_lupus	1	unknown	Mass	20	0.108			unknown		Bauchot R, Diagne M, Platel R, Ridet J-M, Bauchot M-L. in Fishbase. www.fishbase.org. date of access: Apr.-13-17
Scorpaeniformes	Perciformes	Anarhichadidae	Anarhichas	lupus		Anarhichas_lupus	1	unknown	Mass	40	0.118			unknown		Bauchot R, Diagne M, Platel R, Ridet J-M, Bauchot M-L. in Fishbase. www.fishbase.org. date of access: Apr.-13-17
Scorpaeniformes	Perciformes	Anarhichadidae	Anarhichas	lupus		Anarhichas_lupus	1	unknown	Mass	47	0.145			unknown		Bauchot R, Diagne M, Platel R, Ridet J-M, Bauchot M-L. in Fishbase. www.fishbase.org. date of access: Apr.-13-17
Scorpaeniformes	Perciformes	Anarhichadidae	Anarhichas	lupus		Anarhichas_lupus	1	unknown	Mass	95	0.177			unknown		Bauchot R, Diagne M, Platel R, Ridet J-M, Bauchot M-L. in Fishbase. www.fishbase.org. date of access: Apr.-13-17
Scorpaeniformes	Perciformes	Anarhichadidae	Anarhichas	lupus		Anarhichas_lupus	1	unknown	Mass	130	0.224			unknown		Bauchot R, Diagne M, Platel R, Ridet J-M, Bauchot M-L. in Fishbase. www.fishbase.org. date of access: Apr.-13-17
Scorpaeniformes	Perciformes	Anarhichadidae	Anarhichas	lupus		Anarhichas_lupus	1	unknown	Mass	170	0.234			unknown		Bauchot R, Diagne M, Platel R, Ridet J-M, Bauchot M-L. in Fishbase. www.fishbase.org. date of access: Apr.-13-17
Scorpaeniformes	Perciformes	Anarhichadidae	Anarhichas	lupus		Anarhichas_lupus	1	unknown	Mass	200	0.227			unknown		Bauchot R, Diagne M, Platel R, Ridet J-M, Bauchot M-L. in Fishbase. www.fishbase.org. date of access: Apr.-13-17
Scorpaeniformes	Perciformes	Anarhichadidae	Anarhichas	lupus		Anarhichas_lupus	1	unknown	Mass	300	0.277			unknown		Bauchot R, Diagne M, Platel R, Ridet J-M, Bauchot M-L. in Fishbase. www.fishbase.org. date of access: Apr.-13-17
Scorpaeniformes	Perciformes	Anarhichadidae	Anarhichas	lupus		Anarhichas_lupus	1	unknown	Mass	510	0.253			unknown		Bauchot R, Diagne M, Platel R, Ridet J-M, Bauchot M-L. in Fishbase. www.fishbase.org. date of access: Apr.-13-17
Scorpaeniformes	Perciformes	Anarhichadidae	Anarhichas	lupus		Anarhichas_lupus	1	unknown	Mass	520	0.302			unknown		Bauchot R, Diagne M, Platel R, Ridet J-M, Bauchot M-L. in Fishbase. www.fishbase.org. date of access: Apr.-13-17
Scorpaeniformes	Perciformes	Anarhichadidae	Anarhichas	lupus		Anarhichas_lupus	1	unknown	Mass	690	0.374			unknown		Bauchot R, Diagne M, Platel R, Ridet J-M, Bauchot M-L. in Fishbase. www.fishbase.org. date of access: Apr.-13-17
Scorpaeniformes	Perciformes	Anarhichadidae	Anarhichas	lupus		Anarhichas_lupus	1	unknown	Mass	800	0.318			unknown		Bauchot R, Diagne M, Platel R, Ridet J-M, Bauchot M-L. in Fishbase. www.fishbase.org. date of access: Apr.-13-17
Scorpaeniformes	Perciformes	Anarhichadidae	Anarhichas	lupus		Anarhichas_lupus	1	unknown	Mass	1100	0.339			unknown		Bauchot R, Diagne M, Platel R, Ridet J-M, Bauchot M-L. in Fishbase. www.fishbase.org. date of access: Apr.-13-17
Scorpaeniformes	Perciformes	Anarhichadidae	Anarhichas	lupus		Anarhichas_lupus	1	unknown	Mass	1140	0.452			unknown		Bauchot R, Diagne M, Platel R, Ridet J-M, Bauchot M-L. in Fishbase. www.fishbase.org. date of access: Apr.-13-17
Scorpaeniformes	Perciformes	Anarhichadidae	Anarhichas	lupus		Anarhichas_lupus	1	unknown	Mass	1260	0.5			unknown		Bauchot R, Diagne M, Platel R, Ridet J-M, Bauchot M-L. in Fishbase. www.fishbase.org. date of access: Apr.-13-17
Scorpaeniformes	Perciformes	Anarhichadidae	Anarhichas	lupus		Anarhichas_lupus	1	unknown	Mass	1300	0.445			unknown		Bauchot R, Diagne M, Platel R, Ridet J-M, Bauchot M-L. in Fishbase. www.fishbase.org. date of access: Apr.-13-17
Scorpaeniformes	Perciformes	Anarhichadidae	Anarhichas	lupus		Anarhichas_lupus	1	unknown	Mass	1540	0.499			unknown		Bauchot R, Diagne M, Platel R, Ridet J-M, Bauchot M-L. in Fishbase. www.fishbase.org. date of access: Apr.-13-17
Scorpaeniformes	Perciformes	Anarhichadidae	Anarhichas	lupus		Anarhichas_lupus	1	unknown	Mass	1680	0.552			unknown		Bauchot R, Diagne M, Platel R, Ridet J-M, Bauchot M-L. in Fishbase. www.fishbase.org. date of access: Apr.-13-17
Scorpaeniformes	Perciformes	Anarhichadidae	Anarhichas	lupus		Anarhichas_lupus	1	unknown	Mass	1980	0.5			unknown		Bauchot R, Diagne M, Platel R, Ridet J-M, Bauchot M-L. in Fishbase. www.fishbase.org. date of access: Apr.-13-17
Scorpaeniformes	Perciformes	Anarhichadidae	Anarhichas	lupus		Anarhichas_lupus	1	unknown	Mass	2250	0.68			unknown		Bauchot R, Diagne M, Platel R, Ridet J-M, Bauchot M-L. in Fishbase. www.fishbase.org. date of access: Apr.-13-17
Scorpaeniformes	Perciformes	Anarhichadidae	Anarhichas	lupus		Anarhichas_lupus	1	unknown	Mass	2500	0.601			unknown		Bauchot R, Diagne M, Platel R, Ridet J-M, Bauchot M-L. in Fishbase. www.fishbase.org. date of access: Apr.-13-17
Scorpaeniformes	Perciformes	Anarhichadidae	Anarhichas	minor		Anarhichas_minor	1	unknown	Mass	2250	0.458			unknown		Bauchot R, Diagne M, Platel R, Ridet J-M, Bauchot M-L. in Fishbase. www.fishbase.org. date of access: Apr.-13-17
Scorpaeniformes	Perciformes	Anarhichadidae	Anarhichas	minor		Anarhichas_minor	1	unknown	Mass	2600	0.607			unknown		Bauchot R, Diagne M, Platel R, Ridet J-M, Bauchot M-L. in Fishbase. www.fishbase.org. date of access: Apr.-13-17
Scorpaeniformes	Perciformes	Anarhichadidae	Anarhichas	minor		Anarhichas_minor	1	unknown	Mass	2800	0.532			unknown		Bauchot R, Diagne M, Platel R, Ridet J-M, Bauchot M-L. in Fishbase. www.fishbase.org. date of access: Apr.-13-17
Scorpaeniformes	Perciformes	Anarhichadidae	Anarhichas	minor		Anarhichas_minor	1	unknown	Mass	4750	0.691			unknown		Bauchot R, Diagne M, Platel R, Ridet J-M, Bauchot M-L. in Fishbase. www.fishbase.org. date of access: Apr.-13-17
Scorpaeniformes	Perciformes	Anarhichadidae	Anarhichas	minor		Anarhichas_minor	1	unknown	Mass	5400	0.708			unknown		Bauchot R, Diagne M, Platel R, Ridet J-M, Bauchot M-L. in Fishbase. www.fishbase.org. date of access: Apr.-13-17
Scorpaeniformes	Perciformes	Anarhichadidae	Anarhichas	minor		Anarhichas_minor	1	unknown	Mass	6400	0.754			unknown		Bauchot R, Diagne M, Platel R, Ridet J-M, Bauchot M-L. in Fishbase. www.fishbase.org. date of access: Apr.-13-17
Scorpaeniformes	Perciformes	Anarhichadidae	Anarhichas	minor		Anarhichas_minor	1	unknown	Mass	6900	0.532			unknown		Bauchot R, Diagne M, Platel R, Ridet J-M, Bauchot M-L. in Fishbase. www.fishbase.org. date of access: Apr.-13-17
Scorpaeniformes	Perciformes	Anarhichadidae	Anarhichas	minor		Anarhichas_minor	1	unknown	Mass	9400	0.585			unknown		Bauchot R, Diagne M, Platel R, Ridet J-M, Bauchot M-L. in Fishbase. www.fishbase.org. date of access: Apr.-13-17
Scorpaeniformes	Perciformes	Anarhichadidae	Anarhichas	minor		Anarhichas_minor	1	unknown	Mass	10600	0.7885			unknown		Bauchot R, Diagne M, Platel R, Ridet J-M, Bauchot M-L. in Fishbase. www.fishbase.org. date of access: Apr.-13-17
Scorpaeniformes	Perciformes	Anarhichadidae	Anarhichas	minor		Anarhichas_minor	1	unknown	Mass	11000	0.744			unknown		Bauchot R, Diagne M, Platel R, Ridet J-M, Bauchot M-L. in Fishbase. www.fishbase.org. date of access: Apr.-13-17
Scorpaeniformes	Perciformes	Anarhichadidae	Anarhichas	minor		Anarhichas_minor	1	unknown	Mass	21000	0.967			unknown		Bauchot R, Diagne M, Platel R, Ridet J-M, Bauchot M-L. in Fishbase. www.fishbase.org. date of access: Apr.-13-17
Kurtiformes	Perciformes	Apogonidae	Amioides	polyacanthus		Amioides_polyacanthus	1	unknown	Mass	85	0.307			unknown		Bauchot R, Diagne M, Platel R, Ridet J-M, Bauchot M-L. in Fishbase. www.fishbase.org. date of access: Apr.-13-17
Kurtiformes	Perciformes	Apogonidae	Apogon	coccineus		Apogon_coccineus	1	unknown	Mass	0.9	0.016			unknown		Bauchot R, Diagne M, Platel R, Ridet J-M, Bauchot M-L. in Fishbase. www.fishbase.org. date of access: Apr.-13-17
Kurtiformes	Perciformes	Apogonidae	Apogon	coccineus		Apogon_coccineus	1	unknown	Mass	1.7	0.02	3.2	4.1	unknown		Bauchot R, Diagne M, Platel R, Ridet J-M, Bauchot M-L. in Fishbase. www.fishbase.org. date of access: Apr.-13-17
Kurtiformes	Perciformes	Apogonidae	Apogon	exostigma		Apogon_exostigma	1	unknown	Mass	14.85	0.084			unknown		Iglesias TL et al. (2015) J. Evol. Biol. 28:1080-1090
Kurtiformes	Perciformes	Apogonidae	Apogon	kallopterus		Apogon_kallopterus	1	unknown	Mass	22.8	0.123			unknown		Bauchot R, Diagne M, Platel R, Ridet J-M, Bauchot M-L. in Fishbase. www.fishbase.org. date of access: Apr.-13-17
Kurtiformes	Perciformes	Apogonidae	Apogon	maculatus		Apogon_maculatus	1	unknown	Mass	9.8	0.05			unknown		Iglesias TL et al. (2015) J. Evol. Biol. 28:1080-1090
Kurtiformes	Perciformes	Apogonidae	Apogon	semiornatus		Apogon_semiornatus	1	unknown	Mass	14.3	0.033			unknown		Bauchot R, Diagne M, Platel R, Ridet J-M, Bauchot M-L. in Fishbase. www.fishbase.org. date of access: Apr.-13-17
Kurtiformes	Perciformes	Apogonidae	Apogonichthyoides	timorensis		Apogonichthyoides_timorensis	1	unknown	Mass	11.1	0.074			unknown		Bauchot R, Diagne M, Platel R, Ridet J-M, Bauchot M-L. in Fishbase. www.fishbase.org. date of access: Apr.-13-17
Kurtiformes	Perciformes	Apogonidae	Archamia	fucata		Archamia_fucata	1	unknown	Mass	5.7	0.049			unknown		Bauchot R, Diagne M, Platel R, Ridet J-M, Bauchot M-L. in Fishbase. www.fishbase.org. date of access: Apr.-13-17
Kurtiformes	Perciformes	Apogonidae	Cheilodipterus	arabicus		Cheilodipterus_arabicus	1	unknown	Mass	68	0.187	14	16.8	unknown		Bauchot R, Diagne M, Platel R, Ridet J-M, Bauchot M-L. in Fishbase. www.fishbase.org. date of access: Apr.-13-17
Kurtiformes	Perciformes	Apogonidae	Cheilodipterus	lachneri		Cheilodipterus_lachneri	1	unknown	Mass	25	0.123	10.3	12.5	unknown		Bauchot R, Diagne M, Platel R, Ridet J-M, Bauchot M-L. in Fishbase. www.fishbase.org. date of access: Apr.-13-17
Kurtiformes	Perciformes	Apogonidae	Cheilodipterus	macrodon		Cheilodipterus_macrodon	1	unknown	Mass	13.2	0.093	8	10.2	unknown		Bauchot R, Diagne M, Platel R, Ridet J-M, Bauchot M-L. in Fishbase. www.fishbase.org. date of access: Apr.-13-17
Kurtiformes	Perciformes	Apogonidae	Cheilodipterus	macrodon		Cheilodipterus_macrodon	2	unknown	Mass	21.93	0.108			unknown		Iglesias TL et al. (2015) J. Evol. Biol. 28:1080-1090
Kurtiformes	Perciformes	Apogonidae	Cheilodipterus	novemstriatus		Cheilodipterus_novemstriatus	1	unknown	Mass	3.9	0.041			unknown		Bauchot R, Diagne M, Platel R, Ridet J-M, Bauchot M-L. in Fishbase. www.fishbase.org. date of access: Apr.-13-17
Kurtiformes	Perciformes	Apogonidae	Cheilodipterus	quinquelineatus		Cheilodipterus_quinquelineatus	1	unknown	Mass	208	0.348			Adult		Bauchot R, Diagne M, Platel R, Ridet J-M, Bauchot M-L. in Fishbase. www.fishbase.org. date of access: Apr.-13-17
Kurtiformes	Perciformes	Apogonidae	Fowleria	aurita		Fowleria_aurita	1	unknown	Mass	2.8	0.027			unknown		Bauchot R, Diagne M, Platel R, Ridet J-M, Bauchot M-L. in Fishbase. www.fishbase.org. date of access: Apr.-13-17
Blenniiformes	Perciformes	Blenniidae	Antennablennius	australis		Antennablennius_australis	1	unknown	Mass	1.4	0.0138	5	5.7	unknown		Bauchot R, Diagne M, Platel R, Ridet J-M, Bauchot M-L. in Fishbase. www.fishbase.org. date of access: Apr.-13-17
Blenniiformes	Perciformes	Blenniidae	Blenniella	chrysospilos		Blenniella_chrysospilos	1	unknown	Mass	1.1	0.0155	4.2	5.2	unknown		Bauchot R, Diagne M, Platel R, Ridet J-M, Bauchot M-L. in Fishbase. www.fishbase.org. date of access: Apr.-13-17
Blenniiformes	Perciformes	Blenniidae	Blenniella	paula		Blenniella_paula	1	unknown	Mass	9	0.0508			unknown		Bauchot R, Diagne M, Platel R, Ridet J-M, Bauchot M-L. in Fishbase. www.fishbase.org. date of access: Apr.-13-17
Blenniiformes	Perciformes	Blenniidae	Blenniella	periophthalmus		Blenniella_periophthalmus	1	unknown	Mass	12	0.0421		8	unknown		Bauchot R, Diagne M, Platel R, Ridet J-M, Bauchot M-L. in Fishbase. www.fishbase.org. date of access: Apr.-13-17
Blenniiformes	Perciformes	Blenniidae	Lipophrys	pholis		Lipophrys_pholis	1	unknown	Mass	4.6	0.035	7	8.2	Adult		Bauchot R, Diagne M, Platel R, Ridet J-M, Bauchot M-L. in Fishbase. www.fishbase.org. date of access: Apr.-13-17
Blenniiformes	Perciformes	Blenniidae	Lipophrys	pholis		Lipophrys_pholis	1	unknown	Mass	4.7	0.037	6.8	8	Adult		Bauchot R, Diagne M, Platel R, Ridet J-M, Bauchot M-L. in Fishbase. www.fishbase.org. date of access: Apr.-13-17
Blenniiformes	Perciformes	Blenniidae	Lipophrys	pholis		Lipophrys_pholis	1	unknown	Mass	4.9	0.041	6.9	8	Adult		Bauchot R, Diagne M, Platel R, Ridet J-M, Bauchot M-L. in Fishbase. www.fishbase.org. date of access: Apr.-13-17
Blenniiformes	Perciformes	Blenniidae	Lipophrys	pholis		Lipophrys_pholis	1	unknown	Mass	4.9	0.039	7.2	8.4	Adult		Bauchot R, Diagne M, Platel R, Ridet J-M, Bauchot M-L. in Fishbase. www.fishbase.org. date of access: Apr.-13-17
Blenniiformes	Perciformes	Blenniidae	Lipophrys	pholis		Lipophrys_pholis	1	unknown	Mass	5	0.044	7	8.2	Adult		Bauchot R, Diagne M, Platel R, Ridet J-M, Bauchot M-L. in Fishbase. www.fishbase.org. date of access: Apr.-13-17
Blenniiformes	Perciformes	Blenniidae	Lipophrys	pholis		Lipophrys_pholis	1	unknown	Mass	5	0.04	7.2	8.3	Adult		Bauchot R, Diagne M, Platel R, Ridet J-M, Bauchot M-L. in Fishbase. www.fishbase.org. date of access: Apr.-13-17
Blenniiformes	Perciformes	Blenniidae	Lipophrys	pholis		Lipophrys_pholis	1	unknown	Mass	5.8	0.042	7.2	8.4	Adult		Bauchot R, Diagne M, Platel R, Ridet J-M, Bauchot M-L. in Fishbase. www.fishbase.org. date of access: Apr.-13-17
Blenniiformes	Perciformes	Blenniidae	Lipophrys	pholis		Lipophrys_pholis	1	unknown	Mass	7	0.043			Adult		Bauchot R, Diagne M, Platel R, Ridet J-M, Bauchot M-L. in Fishbase. www.fishbase.org. date of access: Apr.-13-17
Blenniiformes	Perciformes	Blenniidae	Lipophrys	pholis		Lipophrys_pholis	1	unknown	Mass	7.1	0.045	7.8	9.2	Adult		Bauchot R, Diagne M, Platel R, Ridet J-M, Bauchot M-L. in Fishbase. www.fishbase.org. date of access: Apr.-13-17
Blenniiformes	Perciformes	Blenniidae	Lipophrys	pholis		Lipophrys_pholis	1	unknown	Mass	7.1	0.046			Adult		Bauchot R, Diagne M, Platel R, Ridet J-M, Bauchot M-L. in Fishbase. www.fishbase.org. date of access: Apr.-13-17
Blenniiformes	Perciformes	Blenniidae	Lipophrys	pholis		Lipophrys_pholis	1	unknown	Mass	7.3	0.048	7.8	9.2	Adult		Bauchot R, Diagne M, Platel R, Ridet J-M, Bauchot M-L. in Fishbase. www.fishbase.org. date of access: Apr.-13-17
Blenniiformes	Perciformes	Blenniidae	Lipophrys	pholis		Lipophrys_pholis	1	unknown	Mass	7.5	0.05	7.9	9.2	Adult		Bauchot R, Diagne M, Platel R, Ridet J-M, Bauchot M-L. in Fishbase. www.fishbase.org. date of access: Apr.-13-17
Blenniiformes	Perciformes	Blenniidae	Lipophrys	pholis		Lipophrys_pholis	1	unknown	Mass	7.6	0.043	8.3	9.6	Adult		Bauchot R, Diagne M, Platel R, Ridet J-M, Bauchot M-L. in Fishbase. www.fishbase.org. date of access: Apr.-13-17
Blenniiformes	Perciformes	Blenniidae	Lipophrys	pholis		Lipophrys_pholis	1	unknown	Mass	7.7	0.045	7.9	9.1	Adult		Bauchot R, Diagne M, Platel R, Ridet J-M, Bauchot M-L. in Fishbase. www.fishbase.org. date of access: Apr.-13-17
Blenniiformes	Perciformes	Blenniidae	Lipophrys	pholis		Lipophrys_pholis	1	unknown	Mass	8.1	0.049	8.3	9.5	Adult		Bauchot R, Diagne M, Platel R, Ridet J-M, Bauchot M-L. in Fishbase. www.fishbase.org. date of access: Apr.-13-17
Blenniiformes	Perciformes	Blenniidae	Lipophrys	pholis		Lipophrys_pholis	1	unknown	Mass	8.1	0.05	8	9.4	Adult		Bauchot R, Diagne M, Platel R, Ridet J-M, Bauchot M-L. in Fishbase. www.fishbase.org. date of access: Apr.-13-17
Blenniiformes	Perciformes	Blenniidae	Lipophrys	pholis		Lipophrys_pholis	1	unknown	Mass	8.2	0.047	8.2	9.5	Adult		Bauchot R, Diagne M, Platel R, Ridet J-M, Bauchot M-L. in Fishbase. www.fishbase.org. date of access: Apr.-13-17
Blenniiformes	Perciformes	Blenniidae	Lipophrys	pholis		Lipophrys_pholis	1	unknown	Mass	8.4	0.053			Adult		Bauchot R, Diagne M, Platel R, Ridet J-M, Bauchot M-L. in Fishbase. www.fishbase.org. date of access: Apr.-13-17
Blenniiformes	Perciformes	Blenniidae	Lipophrys	pholis		Lipophrys_pholis	1	unknown	Mass	8.5	0.05	8.5	9.8	Adult		Bauchot R, Diagne M, Platel R, Ridet J-M, Bauchot M-L. in Fishbase. www.fishbase.org. date of access: Apr.-13-17
Blenniiformes	Perciformes	Blenniidae	Lipophrys	pholis		Lipophrys_pholis	1	unknown	Mass	8.6	0.054	8.2	9.7	Adult		Bauchot R, Diagne M, Platel R, Ridet J-M, Bauchot M-L. in Fishbase. www.fishbase.org. date of access: Apr.-13-17
Blenniiformes	Perciformes	Blenniidae	Lipophrys	pholis		Lipophrys_pholis	1	unknown	Mass	8.7	0.051			Adult		Bauchot R, Diagne M, Platel R, Ridet J-M, Bauchot M-L. in Fishbase. www.fishbase.org. date of access: Apr.-13-17
Blenniiformes	Perciformes	Blenniidae	Lipophrys	pholis		Lipophrys_pholis	1	unknown	Mass	9.3	0.05	8.8	10.2	Adult		Bauchot R, Diagne M, Platel R, Ridet J-M, Bauchot M-L. in Fishbase. www.fishbase.org. date of access: Apr.-13-17
Blenniiformes	Perciformes	Blenniidae	Lipophrys	pholis		Lipophrys_pholis	1	unknown	Mass	9.9	0.05	8.5	10	Adult		Bauchot R, Diagne M, Platel R, Ridet J-M, Bauchot M-L. in Fishbase. www.fishbase.org. date of access: Apr.-13-17
Blenniiformes	Perciformes	Blenniidae	Lipophrys	pholis		Lipophrys_pholis	1	unknown	Mass	10.6	0.053	9.1	10.5	Adult		Bauchot R, Diagne M, Platel R, Ridet J-M, Bauchot M-L. in Fishbase. www.fishbase.org. date of access: Apr.-13-17
Blenniiformes	Perciformes	Blenniidae	Lipophrys	pholis		Lipophrys_pholis	1	unknown	Mass	11.2	0.058	9.3	10.7	Adult		Bauchot R, Diagne M, Platel R, Ridet J-M, Bauchot M-L. in Fishbase. www.fishbase.org. date of access: Apr.-13-17
Blenniiformes	Perciformes	Blenniidae	Lipophrys	pholis		Lipophrys_pholis	1	unknown	Mass	11.6	0.068	9.2	10.9	Adult		Bauchot R, Diagne M, Platel R, Ridet J-M, Bauchot M-L. in Fishbase. www.fishbase.org. date of access: Apr.-13-17
Blenniiformes	Perciformes	Blenniidae	Lipophrys	pholis		Lipophrys_pholis	1	unknown	Mass	12.4	0.056			Adult		Bauchot R, Diagne M, Platel R, Ridet J-M, Bauchot M-L. in Fishbase. www.fishbase.org. date of access: Apr.-13-17
Blenniiformes	Perciformes	Blenniidae	Lipophrys	pholis		Lipophrys_pholis	1	unknown	Mass	17	0.065	10.2	11.7	Adult		Bauchot R, Diagne M, Platel R, Ridet J-M, Bauchot M-L. in Fishbase. www.fishbase.org. date of access: Apr.-13-17
Blenniiformes	Perciformes	Blenniidae	Lipophrys	pholis		Lipophrys_pholis	1	unknown	Mass	17.9	0.075	10.4	12.1	Adult		Bauchot R, Diagne M, Platel R, Ridet J-M, Bauchot M-L. in Fishbase. www.fishbase.org. date of access: Apr.-13-17
Blenniiformes	Perciformes	Blenniidae	Lipophrys	pholis		Lipophrys_pholis	1	unknown	Mass	24.5	0.07	11.4	13.1	Adult		Bauchot R, Diagne M, Platel R, Ridet J-M, Bauchot M-L. in Fishbase. www.fishbase.org. date of access: Apr.-13-17
Blenniiformes	Perciformes	Blenniidae	Lipophrys	pholis		Lipophrys_pholis	1	unknown	Mass	25	0.096	12.2	14	Adult		Bauchot R, Diagne M, Platel R, Ridet J-M, Bauchot M-L. in Fishbase. www.fishbase.org. date of access: Apr.-13-17
Blenniiformes	Perciformes	Blenniidae	Lipophrys	pholis		Lipophrys_pholis	1	unknown	Mass	4.2	0.037	6.6	7.7	unknown		Bauchot R, Diagne M, Platel R, Ridet J-M, Bauchot M-L. in Fishbase. www.fishbase.org. date of access: Apr.-13-17
Blenniiformes	Perciformes	Blenniidae	Meiacanthus	anema		Meiacanthus_anema	1	unknown	Mass	0.4	0.0076			unknown		Bauchot R, Diagne M, Platel R, Ridet J-M, Bauchot M-L. in Fishbase. www.fishbase.org. date of access: Apr.-13-17
Blenniiformes	Perciformes	Blenniidae	Parablennius	gattorugine		Parablennius_gattorugine	1	unknown	Mass	16.5	0.059	9.3	10.8	unknown		Bauchot R, Diagne M, Platel R, Ridet J-M, Bauchot M-L. in Fishbase. www.fishbase.org. date of access: Apr.-13-17
Blenniiformes	Perciformes	Blenniidae	Parablennius	gattorugine		Parablennius_gattorugine	1	unknown	Mass	42.2	0.097			unknown		Bauchot R, Diagne M, Platel R, Ridet J-M, Bauchot M-L. in Fishbase. www.fishbase.org. date of access: Apr.-13-17
Blenniiformes	Perciformes	Blenniidae	Parablennius	gattorugine		Parablennius_gattorugine	1	unknown	Mass	42.9	0.102			unknown		Bauchot R, Diagne M, Platel R, Ridet J-M, Bauchot M-L. in Fishbase. www.fishbase.org. date of access: Apr.-13-17
Blenniiformes	Perciformes	Blenniidae	Parablennius	gattorugine		Parablennius_gattorugine	1	unknown	Mass	44.1	0.09	13.5	15.6	unknown		Bauchot R, Diagne M, Platel R, Ridet J-M, Bauchot M-L. in Fishbase. www.fishbase.org. date of access: Apr.-13-17
Blenniiformes	Perciformes	Blenniidae	Parablennius	gattorugine		Parablennius_gattorugine	1	unknown	Mass	47.4	0.104	14.4	16.8	unknown		Bauchot R, Diagne M, Platel R, Ridet J-M, Bauchot M-L. in Fishbase. www.fishbase.org. date of access: Apr.-13-17
Blenniiformes	Perciformes	Blenniidae	Parablennius	gattorugine		Parablennius_gattorugine	1	unknown	Mass	47.7	0.104	14.1	16.4	unknown		Bauchot R, Diagne M, Platel R, Ridet J-M, Bauchot M-L. in Fishbase. www.fishbase.org. date of access: Apr.-13-17
Blenniiformes	Perciformes	Blenniidae	Parablennius	gattorugine		Parablennius_gattorugine	1	unknown	Mass	52	0.093	14	15.9	unknown		Bauchot R, Diagne M, Platel R, Ridet J-M, Bauchot M-L. in Fishbase. www.fishbase.org. date of access: Apr.-13-17
Blenniiformes	Perciformes	Blenniidae	Parablennius	gattorugine		Parablennius_gattorugine	1	unknown	Mass	54.2	0.128	15	17.4	unknown		Bauchot R, Diagne M, Platel R, Ridet J-M, Bauchot M-L. in Fishbase. www.fishbase.org. date of access: Apr.-13-17
Blenniiformes	Perciformes	Blenniidae	Parablennius	gattorugine		Parablennius_gattorugine	1	unknown	Mass	54.6	0.093	14.4	16.9	unknown		Bauchot R, Diagne M, Platel R, Ridet J-M, Bauchot M-L. in Fishbase. www.fishbase.org. date of access: Apr.-13-17
Blenniiformes	Perciformes	Blenniidae	Parablennius	gattorugine		Parablennius_gattorugine	1	unknown	Mass	57.2	0.119	14.4	16.6	unknown		Bauchot R, Diagne M, Platel R, Ridet J-M, Bauchot M-L. in Fishbase. www.fishbase.org. date of access: Apr.-13-17
Blenniiformes	Perciformes	Blenniidae	Parablennius	gattorugine		Parablennius_gattorugine	1	unknown	Mass	59.2	0.109	15	17.6	unknown		Bauchot R, Diagne M, Platel R, Ridet J-M, Bauchot M-L. in Fishbase. www.fishbase.org. date of access: Apr.-13-17
Blenniiformes	Perciformes	Blenniidae	Parablennius	gattorugine		Parablennius_gattorugine	1	unknown	Mass	59.4	0.103	15.1	17.2	unknown		Bauchot R, Diagne M, Platel R, Ridet J-M, Bauchot M-L. in Fishbase. www.fishbase.org. date of access: Apr.-13-17
Blenniiformes	Perciformes	Blenniidae	Parablennius	gattorugine		Parablennius_gattorugine	1	unknown	Mass	64.9	0.11	15.4	17.5	unknown		Bauchot R, Diagne M, Platel R, Ridet J-M, Bauchot M-L. in Fishbase. www.fishbase.org. date of access: Apr.-13-17
Blenniiformes	Perciformes	Blenniidae	Parablennius	gattorugine		Parablennius_gattorugine	1	unknown	Mass	65.3	0.118	14.9	17.5	unknown		Bauchot R, Diagne M, Platel R, Ridet J-M, Bauchot M-L. in Fishbase. www.fishbase.org. date of access: Apr.-13-17
Blenniiformes	Perciformes	Blenniidae	Parablennius	gattorugine		Parablennius_gattorugine	1	unknown	Mass	67.9	0.111	15.4	18	unknown		Bauchot R, Diagne M, Platel R, Ridet J-M, Bauchot M-L. in Fishbase. www.fishbase.org. date of access: Apr.-13-17
Blenniiformes	Perciformes	Blenniidae	Parablennius	gattorugine		Parablennius_gattorugine	1	unknown	Mass	73	0.115	16.2	18.6	unknown		Bauchot R, Diagne M, Platel R, Ridet J-M, Bauchot M-L. in Fishbase. www.fishbase.org. date of access: Apr.-13-17
Blenniiformes	Perciformes	Blenniidae	Parablennius	gattorugine		Parablennius_gattorugine	1	unknown	Mass	74	0.131	16.3	18.8	unknown		Bauchot R, Diagne M, Platel R, Ridet J-M, Bauchot M-L. in Fishbase. www.fishbase.org. date of access: Apr.-13-17
Blenniiformes	Perciformes	Blenniidae	Parablennius	gattorugine		Parablennius_gattorugine	1	unknown	Mass	75	0.138	16.4	19	unknown		Bauchot R, Diagne M, Platel R, Ridet J-M, Bauchot M-L. in Fishbase. www.fishbase.org. date of access: Apr.-13-17
Blenniiformes	Perciformes	Blenniidae	Parablennius	gattorugine		Parablennius_gattorugine	1	unknown	Mass	84.2	0.136	16.5	19.1	unknown		Bauchot R, Diagne M, Platel R, Ridet J-M, Bauchot M-L. in Fishbase. www.fishbase.org. date of access: Apr.-13-17
Blenniiformes	Perciformes	Blenniidae	Parablennius	gattorugine		Parablennius_gattorugine	1	unknown	Mass	109	0.153	18.5	21.2	unknown		Bauchot R, Diagne M, Platel R, Ridet J-M, Bauchot M-L. in Fishbase. www.fishbase.org. date of access: Apr.-13-17
Blenniiformes	Perciformes	Blenniidae	Parablennius	sanguinolentus		Parablennius_sanguinolentus	1	unknown	Mass	40	0.077	13.5	15.5	unknown		Bauchot R, Diagne M, Platel R, Ridet J-M, Bauchot M-L. in Fishbase. www.fishbase.org. date of access: Apr.-13-17
Blenniiformes	Perciformes	Blenniidae	Parablennius	sanguinolentus		Parablennius_sanguinolentus	1	unknown	Mass	52	0.125	14.4	16.6	unknown		Bauchot R, Diagne M, Platel R, Ridet J-M, Bauchot M-L. in Fishbase. www.fishbase.org. date of access: Apr.-13-17
Blenniiformes	Perciformes	Blenniidae	Salarias	fasciatus		Salarias_fasciatus	1	unknown	Mass	9	0.057	8	9.7	unknown		Bauchot R, Diagne M, Platel R, Ridet J-M, Bauchot M-L. in Fishbase. www.fishbase.org. date of access: Apr.-13-17
Blenniiformes	Perciformes	Blenniidae	Salarias	fasciatus		Salarias_fasciatus	1	unknown	Mass	9.87	0.056			unknown		Iglesias TL et al. (2015) J. Evol. Biol. 28:1080-1090
Perciformes	Perciformes	Bramidae	Brama	brama		Brama_brama	1	unknown	Mass	1850	1.261			unknown		Bauchot R, Diagne M, Platel R, Ridet J-M, Bauchot M-L. in Fishbase. www.fishbase.org. date of access: Apr.-13-17
Perciformes	Perciformes	Caesionidae	Caesio	caerulaurea		Caesio_caerulaurea	1	unknown	Mass	290	0.6984			unknown		Bauchot R, Diagne M, Platel R, Ridet J-M, Bauchot M-L. in Fishbase. www.fishbase.org. date of access: Apr.-13-17
Perciformes	Perciformes	Caesionidae	Caesio	cuning		Caesio_cuning	1	unknown	Mass	335	0.611			unknown		Bauchot R, Diagne M, Platel R, Ridet J-M, Bauchot M-L. in Fishbase. www.fishbase.org. date of access: Apr.-13-17
Perciformes	Perciformes	Caesionidae	Pterocaesio	digramma		Pterocaesio_digramma	1	unknown	Mass	106	0.424			unknown		Bauchot R, Diagne M, Platel R, Ridet J-M, Bauchot M-L. in Fishbase. www.fishbase.org. date of access: Apr.-13-17
Perciformes	Perciformes	Caesionidae	Pterocaesio	digramma		Pterocaesio_digramma	1	unknown	Mass	210	0.726			unknown		Bauchot R, Diagne M, Platel R, Ridet J-M, Bauchot M-L. in Fishbase. www.fishbase.org. date of access: Apr.-13-17
Perciformes	Perciformes	Caesionidae	Pterocaesio	pisang		Pterocaesio_pisang	1	unknown	Mass	195	0.728			unknown		Bauchot R, Diagne M, Platel R, Ridet J-M, Bauchot M-L. in Fishbase. www.fishbase.org. date of access: Apr.-13-17
Perciformes	Perciformes	Callionymidae	Callionymus	grossi		Callionymus_grossi	1	unknown	Mass	23	0.068			unknown		Bauchot R, Diagne M, Platel R, Ridet J-M, Bauchot M-L. in Fishbase. www.fishbase.org. date of access: Apr.-13-17
Perciformes	Perciformes	Callionymidae	Callionymus	lyra		Callionymus_lyra	1	unknown	Mass	20.9	0.059	12.5	14.5	Adult		Bauchot R, Diagne M, Platel R, Ridet J-M, Bauchot M-L. in Fishbase. www.fishbase.org. date of access: Apr.-13-17
Perciformes	Perciformes	Callionymidae	Callionymus	lyra		Callionymus_lyra	1	unknown	Mass	25.7	0.062	13.5	15.5	Adult		Bauchot R, Diagne M, Platel R, Ridet J-M, Bauchot M-L. in Fishbase. www.fishbase.org. date of access: Apr.-13-17
Perciformes	Perciformes	Callionymidae	Callionymus	lyra		Callionymus_lyra	1	unknown	Mass	26.1	0.071	12.5	15.3	Adult		Bauchot R, Diagne M, Platel R, Ridet J-M, Bauchot M-L. in Fishbase. www.fishbase.org. date of access: Apr.-13-17
Perciformes	Perciformes	Callionymidae	Callionymus	lyra		Callionymus_lyra	1	unknown	Mass	30.8	0.07	13	16.2	Adult		Bauchot R, Diagne M, Platel R, Ridet J-M, Bauchot M-L. in Fishbase. www.fishbase.org. date of access: Apr.-13-17
Perciformes	Perciformes	Callionymidae	Callionymus	lyra		Callionymus_lyra	1	unknown	Mass	36.5	0.067	12.6	15.4	Adult		Bauchot R, Diagne M, Platel R, Ridet J-M, Bauchot M-L. in Fishbase. www.fishbase.org. date of access: Apr.-13-17
Perciformes	Perciformes	Callionymidae	Callionymus	lyra		Callionymus_lyra	1	unknown	Mass	40	0.0747			Adult		Bauchot R, Diagne M, Platel R, Ridet J-M, Bauchot M-L. in Fishbase. www.fishbase.org. date of access: Apr.-13-17
Perciformes	Perciformes	Callionymidae	Callionymus	lyra		Callionymus_lyra	1	unknown	Mass	50	0.11	18.5	23	Adult		Bauchot R, Diagne M, Platel R, Ridet J-M, Bauchot M-L. in Fishbase. www.fishbase.org. date of access: Apr.-13-17
Perciformes	Perciformes	Callionymidae	Callionymus	lyra		Callionymus_lyra	1	unknown	Mass	71	0.161	20	24.5	Adult		Bauchot R, Diagne M, Platel R, Ridet J-M, Bauchot M-L. in Fishbase. www.fishbase.org. date of access: Apr.-13-17
Perciformes	Perciformes	Callionymidae	Callionymus	lyra		Callionymus_lyra	1	unknown	Mass	80	0.157		24	Adult		Bauchot R, Diagne M, Platel R, Ridet J-M, Bauchot M-L. in Fishbase. www.fishbase.org. date of access: Apr.-13-17
Perciformes	Perciformes	Callionymidae	Callionymus	lyra		Callionymus_lyra	1	unknown	Mass	200	0.19			Adult		Bauchot R, Diagne M, Platel R, Ridet J-M, Bauchot M-L. in Fishbase. www.fishbase.org. date of access: Apr.-13-17
Perciformes	Perciformes	Callionymidae	Callionymus	lyra		Callionymus_lyra	1	unknown	Mass	1.1	0.014			unknown		Bauchot R, Diagne M, Platel R, Ridet J-M, Bauchot M-L. in Fishbase. www.fishbase.org. date of access: Apr.-13-17
Perciformes	Perciformes	Callionymidae	Callionymus	lyra		Callionymus_lyra	1	unknown	Mass	1.7	0.0242	5.4	6.7	unknown		Bauchot R, Diagne M, Platel R, Ridet J-M, Bauchot M-L. in Fishbase. www.fishbase.org. date of access: Apr.-13-17
Perciformes	Perciformes	Callionymidae	Callionymus	lyra		Callionymus_lyra	1	unknown	Mass	1.9	0.0202	5.3	6.5	unknown		Bauchot R, Diagne M, Platel R, Ridet J-M, Bauchot M-L. in Fishbase. www.fishbase.org. date of access: Apr.-13-17
Perciformes	Perciformes	Callionymidae	Callionymus	lyra		Callionymus_lyra	1	unknown	Mass	2	0.0214	5.4	6.6	unknown		Bauchot R, Diagne M, Platel R, Ridet J-M, Bauchot M-L. in Fishbase. www.fishbase.org. date of access: Apr.-13-17
Perciformes	Perciformes	Callionymidae	Callionymus	lyra		Callionymus_lyra	1	unknown	Mass	2.3	0.021	5.2	6.3	unknown		Bauchot R, Diagne M, Platel R, Ridet J-M, Bauchot M-L. in Fishbase. www.fishbase.org. date of access: Apr.-13-17
Perciformes	Perciformes	Callionymidae	Callionymus	lyra		Callionymus_lyra	1	unknown	Mass	2.3	0.022	5.6	6.8	unknown		Bauchot R, Diagne M, Platel R, Ridet J-M, Bauchot M-L. in Fishbase. www.fishbase.org. date of access: Apr.-13-17
Perciformes	Perciformes	Callionymidae	Callionymus	lyra		Callionymus_lyra	1	unknown	Mass	2.3	0.0264	5.9	7	unknown		Bauchot R, Diagne M, Platel R, Ridet J-M, Bauchot M-L. in Fishbase. www.fishbase.org. date of access: Apr.-13-17
Perciformes	Perciformes	Callionymidae	Callionymus	lyra		Callionymus_lyra	1	unknown	Mass	2.5	0.0267	6.1	7.5	unknown		Bauchot R, Diagne M, Platel R, Ridet J-M, Bauchot M-L. in Fishbase. www.fishbase.org. date of access: Apr.-13-17
Perciformes	Perciformes	Callionymidae	Callionymus	lyra		Callionymus_lyra	1	unknown	Mass	2.7	0.02	5.7	6.9	unknown		Bauchot R, Diagne M, Platel R, Ridet J-M, Bauchot M-L. in Fishbase. www.fishbase.org. date of access: Apr.-13-17
Perciformes	Perciformes	Callionymidae	Callionymus	lyra		Callionymus_lyra	1	unknown	Mass	3	0.0292	6.5	8	unknown		Bauchot R, Diagne M, Platel R, Ridet J-M, Bauchot M-L. in Fishbase. www.fishbase.org. date of access: Apr.-13-17
Perciformes	Perciformes	Callionymidae	Callionymus	lyra		Callionymus_lyra	1	unknown	Mass	3.2	0.026	6.6	8	unknown		Bauchot R, Diagne M, Platel R, Ridet J-M, Bauchot M-L. in Fishbase. www.fishbase.org. date of access: Apr.-13-17
Perciformes	Perciformes	Callionymidae	Callionymus	lyra		Callionymus_lyra	1	unknown	Mass	3.3	0.0258			unknown		Bauchot R, Diagne M, Platel R, Ridet J-M, Bauchot M-L. in Fishbase. www.fishbase.org. date of access: Apr.-13-17
Perciformes	Perciformes	Callionymidae	Callionymus	lyra		Callionymus_lyra	1	unknown	Mass	3.3	0.0283	6.6	8	unknown		Bauchot R, Diagne M, Platel R, Ridet J-M, Bauchot M-L. in Fishbase. www.fishbase.org. date of access: Apr.-13-17
Perciformes	Perciformes	Callionymidae	Callionymus	lyra		Callionymus_lyra	1	unknown	Mass	3.9	0.0294			unknown		Bauchot R, Diagne M, Platel R, Ridet J-M, Bauchot M-L. in Fishbase. www.fishbase.org. date of access: Apr.-13-17
Perciformes	Perciformes	Callionymidae	Callionymus	lyra		Callionymus_lyra	1	unknown	Mass	4	0.0313			unknown		Bauchot R, Diagne M, Platel R, Ridet J-M, Bauchot M-L. in Fishbase. www.fishbase.org. date of access: Apr.-13-17
Perciformes	Perciformes	Callionymidae	Callionymus	lyra		Callionymus_lyra	1	unknown	Mass	4.1	0.0325	7.2	8.8	unknown		Bauchot R, Diagne M, Platel R, Ridet J-M, Bauchot M-L. in Fishbase. www.fishbase.org. date of access: Apr.-13-17
Perciformes	Perciformes	Callionymidae	Callionymus	lyra		Callionymus_lyra	1	unknown	Mass	4.4	0.0298	7.1	8.5	unknown		Bauchot R, Diagne M, Platel R, Ridet J-M, Bauchot M-L. in Fishbase. www.fishbase.org. date of access: Apr.-13-17
Perciformes	Perciformes	Callionymidae	Callionymus	lyra		Callionymus_lyra	1	unknown	Mass	4.4	0.031	7.1	8.6	unknown		Bauchot R, Diagne M, Platel R, Ridet J-M, Bauchot M-L. in Fishbase. www.fishbase.org. date of access: Apr.-13-17
Perciformes	Perciformes	Callionymidae	Callionymus	lyra		Callionymus_lyra	1	unknown	Mass	4.6	0.0252	7.4	8.8	unknown		Bauchot R, Diagne M, Platel R, Ridet J-M, Bauchot M-L. in Fishbase. www.fishbase.org. date of access: Apr.-13-17
Perciformes	Perciformes	Callionymidae	Callionymus	lyra		Callionymus_lyra	1	unknown	Mass	4.9	0.0287			unknown		Bauchot R, Diagne M, Platel R, Ridet J-M, Bauchot M-L. in Fishbase. www.fishbase.org. date of access: Apr.-13-17
Perciformes	Perciformes	Callionymidae	Callionymus	lyra		Callionymus_lyra	1	unknown	Mass	5.3	0.0338	7.6	9	unknown		Bauchot R, Diagne M, Platel R, Ridet J-M, Bauchot M-L. in Fishbase. www.fishbase.org. date of access: Apr.-13-17
Perciformes	Perciformes	Callionymidae	Callionymus	lyra		Callionymus_lyra	1	unknown	Mass	5.4	0.0299	7.4	9.1	unknown		Bauchot R, Diagne M, Platel R, Ridet J-M, Bauchot M-L. in Fishbase. www.fishbase.org. date of access: Apr.-13-17
Perciformes	Perciformes	Callionymidae	Callionymus	lyra		Callionymus_lyra	1	unknown	Mass	5.6	0.0318			unknown		Bauchot R, Diagne M, Platel R, Ridet J-M, Bauchot M-L. in Fishbase. www.fishbase.org. date of access: Apr.-13-17
Perciformes	Perciformes	Callionymidae	Callionymus	lyra		Callionymus_lyra	1	unknown	Mass	5.7	0.0351	7.8	9.6	unknown		Bauchot R, Diagne M, Platel R, Ridet J-M, Bauchot M-L. in Fishbase. www.fishbase.org. date of access: Apr.-13-17
Perciformes	Perciformes	Callionymidae	Callionymus	lyra		Callionymus_lyra	1	unknown	Mass	6.8	0.0403			unknown		Bauchot R, Diagne M, Platel R, Ridet J-M, Bauchot M-L. in Fishbase. www.fishbase.org. date of access: Apr.-13-17
Perciformes	Perciformes	Callionymidae	Callionymus	lyra		Callionymus_lyra	1	unknown	Mass	7.8	0.0388			unknown		Bauchot R, Diagne M, Platel R, Ridet J-M, Bauchot M-L. in Fishbase. www.fishbase.org. date of access: Apr.-13-17
Perciformes	Perciformes	Callionymidae	Callionymus	lyra		Callionymus_lyra	1	unknown	Mass	11.2	0.0457	9.2	11.4	unknown		Bauchot R, Diagne M, Platel R, Ridet J-M, Bauchot M-L. in Fishbase. www.fishbase.org. date of access: Apr.-13-17
Perciformes	Perciformes	Callionymidae	Callionymus	lyra		Callionymus_lyra	1	unknown	Mass	11.7	0.0439	9.6	11.7	unknown		Bauchot R, Diagne M, Platel R, Ridet J-M, Bauchot M-L. in Fishbase. www.fishbase.org. date of access: Apr.-13-17
Perciformes	Perciformes	Callionymidae	Callionymus	lyra		Callionymus_lyra	1	unknown	Mass	15.1	0.0489	10.2	12.6	unknown		Bauchot R, Diagne M, Platel R, Ridet J-M, Bauchot M-L. in Fishbase. www.fishbase.org. date of access: Apr.-13-17
Perciformes	Perciformes	Callionymidae	Callionymus	lyra		Callionymus_lyra	1	unknown	Mass	15.5	0.0503	10.7	13.2	unknown		Bauchot R, Diagne M, Platel R, Ridet J-M, Bauchot M-L. in Fishbase. www.fishbase.org. date of access: Apr.-13-17
Perciformes	Perciformes	Callionymidae	Callionymus	lyra		Callionymus_lyra	1	unknown	Mass	15.6	0.054	10.6	13.1	unknown		Bauchot R, Diagne M, Platel R, Ridet J-M, Bauchot M-L. in Fishbase. www.fishbase.org. date of access: Apr.-13-17
Perciformes	Perciformes	Callionymidae	Callionymus	maculatus		Callionymus_maculatus	1	unknown	Mass	9	0.0514	12	15	Adult		Bauchot R, Diagne M, Platel R, Ridet J-M, Bauchot M-L. in Fishbase. www.fishbase.org. date of access: Apr.-13-17
Perciformes	Perciformes	Callionymidae	Callionymus	maculatus		Callionymus_maculatus	1	unknown	Mass	10	0.0615	12.5	16	Adult		Bauchot R, Diagne M, Platel R, Ridet J-M, Bauchot M-L. in Fishbase. www.fishbase.org. date of access: Apr.-13-17
Perciformes	Perciformes	Callionymidae	Callionymus	maculatus		Callionymus_maculatus	1	unknown	Mass	16	0.0594			Adult		Bauchot R, Diagne M, Platel R, Ridet J-M, Bauchot M-L. in Fishbase. www.fishbase.org. date of access: Apr.-13-17
Perciformes	Perciformes	Callionymidae	Callionymus	maculatus		Callionymus_maculatus	1	unknown	Mass	18	0.0554	13	17	Adult		Bauchot R, Diagne M, Platel R, Ridet J-M, Bauchot M-L. in Fishbase. www.fishbase.org. date of access: Apr.-13-17
Perciformes	Perciformes	Callionymidae	Callionymus	maculatus		Callionymus_maculatus	1	unknown	Mass	20	0.049	11	13	Adult		Bauchot R, Diagne M, Platel R, Ridet J-M, Bauchot M-L. in Fishbase. www.fishbase.org. date of access: Apr.-13-17
Perciformes	Perciformes	Callionymidae	Callionymus	maculatus		Callionymus_maculatus	1	unknown	Mass	8	0.0453	8.8		unknown		Bauchot R, Diagne M, Platel R, Ridet J-M, Bauchot M-L. in Fishbase. www.fishbase.org. date of access: Apr.-13-17
Perciformes	Perciformes	Callionymidae	Callionymus	sublaevis		Callionymus_sublaevis	1	unknown	Mass	19.5	0.067	11.7	14.3	Adult		Bauchot R, Diagne M, Platel R, Ridet J-M, Bauchot M-L. in Fishbase. www.fishbase.org. date of access: Apr.-13-17
Perciformes	Perciformes	Caproidae	Capros	aper		Capros_aper	1	unknown	Mass	17	0.16	9.5	11.5	Adult		Bauchot R, Diagne M, Platel R, Ridet J-M, Bauchot M-L. in Fishbase. www.fishbase.org. date of access: Apr.-13-17
Perciformes	Perciformes	Caproidae	Capros	aper		Capros_aper	1	unknown	Mass	22	0.172	10	12	Adult		Bauchot R, Diagne M, Platel R, Ridet J-M, Bauchot M-L. in Fishbase. www.fishbase.org. date of access: Apr.-13-17
Perciformes	Perciformes	Caproidae	Capros	aper		Capros_aper	1	unknown	Mass	30	0.152	10	12.2	Adult		Bauchot R, Diagne M, Platel R, Ridet J-M, Bauchot M-L. in Fishbase. www.fishbase.org. date of access: Apr.-13-17
Perciformes	Perciformes	Caproidae	Capros	aper		Capros_aper	1	unknown	Mass	35	0.156	10	12	Adult		Bauchot R, Diagne M, Platel R, Ridet J-M, Bauchot M-L. in Fishbase. www.fishbase.org. date of access: Apr.-13-17
Perciformes	Perciformes	Caproidae	Capros	aper		Capros_aper	1	unknown	Mass	60	0.308	13.5	17	Adult		Bauchot R, Diagne M, Platel R, Ridet J-M, Bauchot M-L. in Fishbase. www.fishbase.org. date of access: Apr.-13-17
Perciformes	Perciformes	Caproidae	Capros	aper		Capros_aper	1	unknown	Mass	10	0.084	6.2		unknown		Bauchot R, Diagne M, Platel R, Ridet J-M, Bauchot M-L. in Fishbase. www.fishbase.org. date of access: Apr.-13-17
Carangiformes	Perciformes	Carangidae	Alepes	djedaba		Alepes_djedaba	1	unknown	Mass	120	0.504			unknown		Bauchot R, Diagne M, Platel R, Ridet J-M, Bauchot M-L. in Fishbase. www.fishbase.org. date of access: Apr.-13-17
Carangiformes	Perciformes	Carangidae	Atule	mate		Atule_mate	1	unknown	Mass	250	0.661	25	30	Adult		Bauchot R, Diagne M, Platel R, Ridet J-M, Bauchot M-L. in Fishbase. www.fishbase.org. date of access: Apr.-13-17
Carangiformes	Perciformes	Carangidae	Carangoides	bartholomaei		Carangoides_bartholomaei	1	f	Mass	4274	7.56			Adult	Caranx bartholomei	Crile G and Quiring DP (1940) Ohio J Sci 40:219-259.	Key West Florida
Carangiformes	Perciformes	Carangidae	Carangoides	bartholomaei		Carangoides_bartholomaei	1	m	Mass	4812	4.72			Adult	Caranx bartholomei	Crile G and Quiring DP (1940) Ohio J Sci 40:219-259.	Key West Florida
Carangiformes	Perciformes	Carangidae	Carangoides	bartholomaei		Carangoides_bartholomaei	1	unknown	Mass	57.6	0.44			unknown		Bauchot R, Diagne M, Platel R, Ridet J-M, Bauchot M-L. in Fishbase. www.fishbase.org. date of access: Apr.-13-17
Carangiformes	Perciformes	Carangidae	Carangoides	chrysophrys		Carangoides_chrysophrys	1	unknown	Mass	140	0.58			unknown		Bauchot R, Diagne M, Platel R, Ridet J-M, Bauchot M-L. in Fishbase. www.fishbase.org. date of access: Apr.-13-17
Carangiformes	Perciformes	Carangidae	Carangoides	equula		Carangoides_equula	1	unknown	Mass	215	1.139			unknown		Bauchot R, Diagne M, Platel R, Ridet J-M, Bauchot M-L. in Fishbase. www.fishbase.org. date of access: Apr.-13-17
Carangiformes	Perciformes	Carangidae	Carangoides	fulvoguttatus		Carangoides_fulvoguttatus	1	unknown	Mass	6200	2.934			unknown		Bauchot R, Diagne M, Platel R, Ridet J-M, Bauchot M-L. in Fishbase. www.fishbase.org. date of access: Apr.-13-17
Carangiformes	Perciformes	Carangidae	Caranx	hippos		Caranx_hippos	1	m	Mass	2305	2.97			unknown		Crile G and Quiring DP (1940) Ohio J Sci 40:219-259.	Key West Florida
Carangiformes	Perciformes	Carangidae	Caranx	ignobilis		Caranx_ignobilis	1	unknown	Mass	3200	1.906	47.5		Adult		Bauchot R, Diagne M, Platel R, Ridet J-M, Bauchot M-L. in Fishbase. www.fishbase.org. date of access: Apr.-13-17
Carangiformes	Perciformes	Carangidae	Caranx	lugubris		Caranx_lugubris	1	unknown	Mass	4160	2.78	55	65	Adult		Bauchot R, Diagne M, Platel R, Ridet J-M, Bauchot M-L. in Fishbase. www.fishbase.org. date of access: Apr.-13-17
Carangiformes	Perciformes	Carangidae	Caranx	lugubris		Caranx_lugubris	1	unknown	Mass	15500	4.64	91	98	Adult		Bauchot R, Diagne M, Platel R, Ridet J-M, Bauchot M-L. in Fishbase. www.fishbase.org. date of access: Apr.-13-17
Carangiformes	Perciformes	Carangidae	Caranx	melampygus		Caranx_melampygus	1	unknown	Mass	980	1.389	39.5	43	Adult		Bauchot R, Diagne M, Platel R, Ridet J-M, Bauchot M-L. in Fishbase. www.fishbase.org. date of access: Apr.-13-17
Carangiformes	Perciformes	Carangidae	Caranx	melampygus		Caranx_melampygus	1	unknown	Mass	1920	2.535	48.5	54.5	Adult		Bauchot R, Diagne M, Platel R, Ridet J-M, Bauchot M-L. in Fishbase. www.fishbase.org. date of access: Apr.-13-17
Carangiformes	Perciformes	Carangidae	Caranx	melampygus		Caranx_melampygus	1	unknown	Mass	2000	2.819			Adult		Bauchot R, Diagne M, Platel R, Ridet J-M, Bauchot M-L. in Fishbase. www.fishbase.org. date of access: Apr.-13-17
Carangiformes	Perciformes	Carangidae	Caranx	melampygus		Caranx_melampygus	1	unknown	Mass	2500	2.937	51.2	59	Adult		Bauchot R, Diagne M, Platel R, Ridet J-M, Bauchot M-L. in Fishbase. www.fishbase.org. date of access: Apr.-13-17
Carangiformes	Perciformes	Carangidae	Caranx	melampygus		Caranx_melampygus	1	unknown	Mass	2775	2.77	55	59.5	Adult		Bauchot R, Diagne M, Platel R, Ridet J-M, Bauchot M-L. in Fishbase. www.fishbase.org. date of access: Apr.-13-17
Carangiformes	Perciformes	Carangidae	Caranx	melampygus		Caranx_melampygus	1	unknown	Mass	4830	3.029			Adult		Bauchot R, Diagne M, Platel R, Ridet J-M, Bauchot M-L. in Fishbase. www.fishbase.org. date of access: Apr.-13-17
Carangiformes	Perciformes	Carangidae	Caranx	melampygus		Caranx_melampygus	1	unknown	Mass	6500	3.295	63	69	Adult		Bauchot R, Diagne M, Platel R, Ridet J-M, Bauchot M-L. in Fishbase. www.fishbase.org. date of access: Apr.-13-17
Carangiformes	Perciformes	Carangidae	Caranx	melampygus		Caranx_melampygus	1	unknown	Mass	70.3	0.432	14	18	unknown		Bauchot R, Diagne M, Platel R, Ridet J-M, Bauchot M-L. in Fishbase. www.fishbase.org. date of access: Apr.-13-17
Carangiformes	Perciformes	Carangidae	Caranx	melampygus		Caranx_melampygus	1	unknown	Mass	102	0.537	16.7	19.5	unknown		Bauchot R, Diagne M, Platel R, Ridet J-M, Bauchot M-L. in Fishbase. www.fishbase.org. date of access: Apr.-13-17
Carangiformes	Perciformes	Carangidae	Caranx	melampygus		Caranx_melampygus	1	unknown	Mass	175	0.712	19.5	22.5	unknown		Bauchot R, Diagne M, Platel R, Ridet J-M, Bauchot M-L. in Fishbase. www.fishbase.org. date of access: Apr.-13-17
Carangiformes	Perciformes	Carangidae	Caranx	sexfasciatus		Caranx_sexfasciatus	1	unknown	Mass	915	1.748	38.5	43	Adult		Bauchot R, Diagne M, Platel R, Ridet J-M, Bauchot M-L. in Fishbase. www.fishbase.org. date of access: Apr.-13-17
Carangiformes	Perciformes	Carangidae	Decapterus	macrosoma		Decapterus_macrosoma	1	unknown	Mass	150	0.785	23.5	25.5	Adult		Bauchot R, Diagne M, Platel R, Ridet J-M, Bauchot M-L. in Fishbase. www.fishbase.org. date of access: Apr.-13-17
Carangiformes	Perciformes	Carangidae	Decapterus	muroadsi		Decapterus_muroadsi	1	unknown	Mass	225	0.978	24.6	27.4	Adult		Bauchot R, Diagne M, Platel R, Ridet J-M, Bauchot M-L. in Fishbase. www.fishbase.org. date of access: Apr.-13-17
Carangiformes	Perciformes	Carangidae	Decapterus	tabl		Decapterus_tabl	1	unknown	Mass	460	1.492			unknown		Iglesias TL et al. (2015) J. Evol. Biol. 28:1080-1090
Carangiformes	Perciformes	Carangidae	Parastromateus	niger		Parastromateus_niger	1	unknown	Mass	400	0.666			unknown		Bauchot R, Diagne M, Platel R, Ridet J-M, Bauchot M-L. in Fishbase. www.fishbase.org. date of access: Apr.-13-17
Carangiformes	Perciformes	Carangidae	Selar	crumenophthalmus		Selar_crumenophthalmus	1	unknown	Mass	135	0.574	21.5	23.3	unknown		Bauchot R, Diagne M, Platel R, Ridet J-M, Bauchot M-L. in Fishbase. www.fishbase.org. date of access: Apr.-13-17
Carangiformes	Perciformes	Carangidae	Selar	crumenophthalmus		Selar_crumenophthalmus	1	unknown	Mass	186	0.66	21.6	24.7	unknown		Bauchot R, Diagne M, Platel R, Ridet J-M, Bauchot M-L. in Fishbase. www.fishbase.org. date of access: Apr.-13-17
Carangiformes	Perciformes	Carangidae	Selar	crumenophthalmus		Selar_crumenophthalmus	1	unknown	Mass	240	1.214	26.2	29	unknown		Bauchot R, Diagne M, Platel R, Ridet J-M, Bauchot M-L. in Fishbase. www.fishbase.org. date of access: Apr.-13-17
Carangiformes	Perciformes	Carangidae	Selaroides	leptolepis		Selaroides_leptolepis	1	unknown	Mass	450	1.289			Adult		Bauchot R, Diagne M, Platel R, Ridet J-M, Bauchot M-L. in Fishbase. www.fishbase.org. date of access: Apr.-13-17
Carangiformes	Perciformes	Carangidae	Selaroides	leptolepis		Selaroides_leptolepis	1	unknown	Mass	12	0.111			unknown		Bauchot R, Diagne M, Platel R, Ridet J-M, Bauchot M-L. in Fishbase. www.fishbase.org. date of access: Apr.-13-17
Carangiformes	Perciformes	Carangidae	Selaroides	leptolepis		Selaroides_leptolepis	1	unknown	Mass	13	0.133			unknown		Bauchot R, Diagne M, Platel R, Ridet J-M, Bauchot M-L. in Fishbase. www.fishbase.org. date of access: Apr.-13-17
Carangiformes	Perciformes	Carangidae	Selaroides	leptolepis		Selaroides_leptolepis	1	unknown	Mass	61	0.278			unknown		Bauchot R, Diagne M, Platel R, Ridet J-M, Bauchot M-L. in Fishbase. www.fishbase.org. date of access: Apr.-13-17
Carangiformes	Perciformes	Carangidae	Seriola	rivoliana		Seriola_rivoliana	1	unknown	Mass	4000	3.395	66.5	76.5	unknown		Bauchot R, Diagne M, Platel R, Ridet J-M, Bauchot M-L. in Fishbase. www.fishbase.org. date of access: Apr.-13-17
Carangiformes	Perciformes	Carangidae	Seriola	rivoliana		Seriola_rivoliana	1	unknown	Mass	6400	3.556	69.5	81.5	unknown		Bauchot R, Diagne M, Platel R, Ridet J-M, Bauchot M-L. in Fishbase. www.fishbase.org. date of access: Apr.-13-17
Carangiformes	Perciformes	Carangidae	Seriolina	nigrofasciata		Seriolina_nigrofasciata	1	unknown	Mass	5600	2.554	63	77.5	unknown		Bauchot R, Diagne M, Platel R, Ridet J-M, Bauchot M-L. in Fishbase. www.fishbase.org. date of access: Apr.-13-17
Carangiformes	Perciformes	Carangidae	Trachinotus	ovatus		Trachinotus_ovatus	1	f	Mass	8504	3.08			unknown	Trachinotus glauous	Crile G and Quiring DP (1940) Ohio J Sci 40:219-259.
Perciformes	Perciformes	Centrarchidae	Lepomis	cyanellus		Lepomis_cyanellus	1	unknown	Mass	82	0.1137			unknown		Bauchot R, Diagne M, Platel R, Ridet J-M, Bauchot M-L. in Fishbase. www.fishbase.org. date of access: Apr.-13-17
Perciformes	Perciformes	Centrarchidae	Lepomis	gibbosus		Lepomis_gibbosus	1	unknown	Mass	29.3	0.138			unknown		Bauchot R, Diagne M, Platel R, Ridet J-M, Bauchot M-L. in Fishbase. www.fishbase.org. date of access: Apr.-13-17
Perciformes	Perciformes	Centrarchidae	Lepomis	gibbosus		Lepomis_gibbosus	1	unknown	Mass	29.4	0.143			unknown		Bauchot R, Diagne M, Platel R, Ridet J-M, Bauchot M-L. in Fishbase. www.fishbase.org. date of access: Apr.-13-17
Scombriformes	Perciformes	Centrolophidae	Centrolophus	niger		Centrolophus_niger	1	unknown	Mass	775	0.321	38	45	unknown		Bauchot R, Diagne M, Platel R, Ridet J-M, Bauchot M-L. in Fishbase. www.fishbase.org. date of access: Apr.-13-17
Scombriformes	Perciformes	Centrolophidae	Centrolophus	niger		Centrolophus_niger	1	unknown	Mass	775	0.378	40		unknown		Bauchot R, Diagne M, Platel R, Ridet J-M, Bauchot M-L. in Fishbase. www.fishbase.org. date of access: Apr.-13-17
Scombriformes	Perciformes	Centrolophidae	Centrolophus	niger		Centrolophus_niger	1	unknown	Mass	920	0.38	42	48	unknown		Bauchot R, Diagne M, Platel R, Ridet J-M, Bauchot M-L. in Fishbase. www.fishbase.org. date of access: Apr.-13-17
Scombriformes	Perciformes	Centrolophidae	Centrolophus	niger		Centrolophus_niger	1	unknown	Mass	1350	0.372	47	55	unknown		Bauchot R, Diagne M, Platel R, Ridet J-M, Bauchot M-L. in Fishbase. www.fishbase.org. date of access: Apr.-13-17
Scombriformes	Perciformes	Centrolophidae	Schedophilus	medusophagus		Schedophilus_medusophagus	1	unknown	Mass	2050	0.385	47	55	unknown		Bauchot R, Diagne M, Platel R, Ridet J-M, Bauchot M-L. in Fishbase. www.fishbase.org. date of access: Apr.-13-17
Perciformes	Perciformes	Cepolidae	Cepola	macrophthalma		Cepola_macrophthalma	1	unknown	Mass	20	0.073	23	26	Adult		Bauchot R, Diagne M, Platel R, Ridet J-M, Bauchot M-L. in Fishbase. www.fishbase.org. date of access: Apr.-13-17
Perciformes	Perciformes	Cepolidae	Cepola	macrophthalma		Cepola_macrophthalma	1	unknown	Mass	30	0.1	31	34	Adult		Bauchot R, Diagne M, Platel R, Ridet J-M, Bauchot M-L. in Fishbase. www.fishbase.org. date of access: Apr.-13-17
Perciformes	Perciformes	Chaetodontidae	Chaetodon	auriga		Chaetodon_auriga	4	unknown	Mass	170.4	0.4547	16.5		Adult	Linophora auriga	Bauchot R et al. (1989) Jpn. J. Ichthyol. 36:63-74	Hawaii, Marshall
Perciformes	Perciformes	Chaetodontidae	Chaetodon	auriga		Chaetodon_auriga	1	unknown	Mass	178	0.452			Adult		Bauchot R, Diagne M, Platel R, Ridet J-M, Bauchot M-L. in Fishbase. www.fishbase.org. date of access: Apr.-13-17
Perciformes	Perciformes	Chaetodontidae	Chaetodon	auriga		Chaetodon_auriga	1	unknown	Mass	112	0.397			unknown		Bauchot R, Diagne M, Platel R, Ridet J-M, Bauchot M-L. in Fishbase. www.fishbase.org. date of access: Apr.-13-17
Perciformes	Perciformes	Chaetodontidae	Chaetodon	auriga		Chaetodon_auriga	1	unknown	Mass	115	0.373			unknown		Bauchot R, Diagne M, Platel R, Ridet J-M, Bauchot M-L. in Fishbase. www.fishbase.org. date of access: Apr.-13-17
Perciformes	Perciformes	Chaetodontidae	Chaetodon	auriga		Chaetodon_auriga	1	unknown	Mass	126	0.388			unknown		Bauchot R, Diagne M, Platel R, Ridet J-M, Bauchot M-L. in Fishbase. www.fishbase.org. date of access: Apr.-13-17
Perciformes	Perciformes	Chaetodontidae	Chaetodon	austriacus		Chaetodon_austriacus	2	unknown	Mass	94.1	0.2829	12		Adult	Mesochaetodon austriacus	Bauchot R et al. (1989) Env. Biol. Fish. 25: 205-219	Red Sea
Perciformes	Perciformes	Chaetodontidae	Chaetodon	austriacus		Chaetodon_austriacus	1	unknown	Mass	20	0.114			unknown		Bauchot R, Diagne M, Platel R, Ridet J-M, Bauchot M-L. in Fishbase. www.fishbase.org. date of access: Apr.-13-17
Perciformes	Perciformes	Chaetodontidae	Chaetodon	austriacus		Chaetodon_austriacus	1	unknown	Mass	62	0.214			unknown		Bauchot R, Diagne M, Platel R, Ridet J-M, Bauchot M-L. in Fishbase. www.fishbase.org. date of access: Apr.-13-17
Perciformes	Perciformes	Chaetodontidae	Chaetodon	baronessa		Chaetodon_baronessa	1	unknown	Mass	102.6	0.2257	12		unknown	Gonochaetodon baronessa	Bauchot R et al. (1989) Env. Biol. Fish. 25: 205-219	New Caledonia
Perciformes	Perciformes	Chaetodontidae	Chaetodon	baronessa		Chaetodon_baronessa	1	unknown	Mass	79	0.2			unknown		Bauchot R, Diagne M, Platel R, Ridet J-M, Bauchot M-L. in Fishbase. www.fishbase.org. date of access: Apr.-13-17
Perciformes	Perciformes	Chaetodontidae	Chaetodon	bennetti		Chaetodon_bennetti	1	unknown	Mass	68.7	0.27			unknown		Iglesias TL et al. (2015) J. Evol. Biol. 28:1080-1090
Perciformes	Perciformes	Chaetodontidae	Chaetodon	capistratus		Chaetodon_capistratus	1	unknown	Mass	13.5	0.143			unknown		Chin, X. (1996) A photographic atlas of brains of common Caribbean reef fishes. Division of Natural Sciences, New College of the University of South Florida. 62 p.
Perciformes	Perciformes	Chaetodontidae	Chaetodon	capistratus		Chaetodon_capistratus	1	unknown	Mass	22.5	0.188			unknown		Iglesias TL et al. (2015) J. Evol. Biol. 28:1080-1090
Perciformes	Perciformes	Chaetodontidae	Chaetodon	citrinellus		Chaetodon_citrinellus	1	unknown	Mass	72.6	0.2905	12		unknown	Exornator citrinellus	Bauchot R et al. (1989) Env. Biol. Fish. 25: 205-219	Marshall
Perciformes	Perciformes	Chaetodontidae	Chaetodon	citrinellus		Chaetodon_citrinellus	1	unknown	Mass	42	0.223			unknown		Bauchot R, Diagne M, Platel R, Ridet J-M, Bauchot M-L. in Fishbase. www.fishbase.org. date of access: Apr.-13-17
Perciformes	Perciformes	Chaetodontidae	Chaetodon	collare		Chaetodon_collare	1	unknown	Mass	125.8	0.37	13		unknown		Bauchot R et al. (1989) Env. Biol. Fish. 25: 205-219	India
Perciformes	Perciformes	Chaetodontidae	Chaetodon	collare		Chaetodon_collare	1	unknown	Mass	20.5	0.153			unknown		Bauchot R, Diagne M, Platel R, Ridet J-M, Bauchot M-L. in Fishbase. www.fishbase.org. date of access: Apr.-13-17
Perciformes	Perciformes	Chaetodontidae	Chaetodon	decussatus		Chaetodon_decussatus	1	unknown	Mass	99	0.3119	13		unknown		Bauchot R et al. (1989) Env. Biol. Fish. 25: 205-219	India
Perciformes	Perciformes	Chaetodontidae	Chaetodon	decussatus		Chaetodon_decussatus	1	unknown	Mass	7.5	0.083	5.5	6.5	unknown		Bauchot R, Diagne M, Platel R, Ridet J-M, Bauchot M-L. in Fishbase. www.fishbase.org. date of access: Apr.-13-17
Perciformes	Perciformes	Chaetodontidae	Chaetodon	dolosus		Chaetodon_dolosus	2	unknown	Mass	71.8	0.3126	12.5		Adult	Heterochaetodon dolosus	Bauchot R et al. (1989) Env. Biol. Fish. 25: 205-219	Reunion
Perciformes	Perciformes	Chaetodontidae	Chaetodon	dolosus		Chaetodon_dolosus	1	unknown	Mass	31	0.226			unknown		Bauchot R, Diagne M, Platel R, Ridet J-M, Bauchot M-L. in Fishbase. www.fishbase.org. date of access: Apr.-13-17
Perciformes	Perciformes	Chaetodontidae	Chaetodon	dolosus		Chaetodon_dolosus	1	unknown	Mass	32	0.251			unknown		Bauchot R, Diagne M, Platel R, Ridet J-M, Bauchot M-L. in Fishbase. www.fishbase.org. date of access: Apr.-13-17
Perciformes	Perciformes	Chaetodontidae	Chaetodon	ephippium		Chaetodon_ephippium	3	unknown	Mass	152.7	0.4255	16		unknown	Rabdophorus ephippium	Bauchot R et al. (1989) Env. Biol. Fish. 25: 205-219	New Caledonia, Marshall
Perciformes	Perciformes	Chaetodontidae	Chaetodon	ephippium		Chaetodon_ephippium	1	unknown	Mass	141	0.45			unknown		Bauchot R, Diagne M, Platel R, Ridet J-M, Bauchot M-L. in Fishbase. www.fishbase.org. date of access: Apr.-13-17
Perciformes	Perciformes	Chaetodontidae	Chaetodon	ephippium		Chaetodon_ephippium	1	unknown	Mass	151	0.395			unknown		Bauchot R, Diagne M, Platel R, Ridet J-M, Bauchot M-L. in Fishbase. www.fishbase.org. date of access: Apr.-13-17
Perciformes	Perciformes	Chaetodontidae	Chaetodon	ephippium		Chaetodon_ephippium	1	unknown	Mass	166	0.416			unknown		Bauchot R, Diagne M, Platel R, Ridet J-M, Bauchot M-L. in Fishbase. www.fishbase.org. date of access: Apr.-13-17
Perciformes	Perciformes	Chaetodontidae	Chaetodon	ephippium		Chaetodon_ephippium	1	unknown	Mass	124.88	0.377			unknown		Iglesias TL et al. (2015) J. Evol. Biol. 28:1080-1090
Perciformes	Perciformes	Chaetodontidae	Chaetodon	fasciatus		Chaetodon_fasciatus	2	unknown	Mass	110.9	0.471	17		Adult	Linophora fasciatus	Bauchot R et al. (1989) Env. Biol. Fish. 25: 205-219	Red Sea
Perciformes	Perciformes	Chaetodontidae	Chaetodon	fasciatus		Chaetodon_fasciatus	1	unknown	Mass	182	0.409			Adult		Bauchot R, Diagne M, Platel R, Ridet J-M, Bauchot M-L. in Fishbase. www.fishbase.org. date of access: Apr.-13-17
Perciformes	Perciformes	Chaetodontidae	Chaetodon	fasciatus		Chaetodon_fasciatus	1	unknown	Mass	67	0.379			unknown		Bauchot R, Diagne M, Platel R, Ridet J-M, Bauchot M-L. in Fishbase. www.fishbase.org. date of access: Apr.-13-17
Perciformes	Perciformes	Chaetodontidae	Chaetodon	flavirostris		Chaetodon_flavirostris	2	unknown	Mass	116.75	0.4544	13.5		unknown	Chaetodontops flavirostris	Bauchot R et al. (1989) Env. Biol. Fish. 25: 205-219	New Caledonia
Perciformes	Perciformes	Chaetodontidae	Chaetodon	flavirostris		Chaetodon_flavirostris	1	unknown	Mass	26.7	0.222			unknown		Bauchot R, Diagne M, Platel R, Ridet J-M, Bauchot M-L. in Fishbase. www.fishbase.org. date of access: Apr.-13-17
Perciformes	Perciformes	Chaetodontidae	Chaetodon	flavirostris		Chaetodon_flavirostris	1	unknown	Mass	120	0.484			unknown		Bauchot R, Diagne M, Platel R, Ridet J-M, Bauchot M-L. in Fishbase. www.fishbase.org. date of access: Apr.-13-17
Perciformes	Perciformes	Chaetodontidae	Chaetodon	kleinii		Chaetodon_kleinii	2	unknown	Mass	43.5	0.2145	10		unknown	Exornator kleinii	Bauchot R et al. (1989) Env. Biol. Fish. 25: 205-219	Reunion, Hawaii
Perciformes	Perciformes	Chaetodontidae	Chaetodon	kleinii		Chaetodon_kleinii	1	unknown	Mass	40.3	0.195			unknown		Bauchot R, Diagne M, Platel R, Ridet J-M, Bauchot M-L. in Fishbase. www.fishbase.org. date of access: Apr.-13-17
Perciformes	Perciformes	Chaetodontidae	Chaetodon	kleinii		Chaetodon_kleinii	1	unknown	Mass	21.4	0.155			unknown		Bauchot R, Diagne M, Platel R, Ridet J-M, Bauchot M-L. in Fishbase. www.fishbase.org. date of access: Apr.-13-17
Perciformes	Perciformes	Chaetodontidae	Chaetodon	kleinii		Chaetodon_kleinii	1	unknown	Mass	25.5	0.158			unknown		Bauchot R, Diagne M, Platel R, Ridet J-M, Bauchot M-L. in Fishbase. www.fishbase.org. date of access: Apr.-13-17
Perciformes	Perciformes	Chaetodontidae	Chaetodon	lunula		Chaetodon_lunula	1	unknown	Mass	130	0.486			unknown		Bauchot R, Diagne M, Platel R, Ridet J-M, Bauchot M-L. in Fishbase. www.fishbase.org. date of access: Apr.-13-17
Perciformes	Perciformes	Chaetodontidae	Chaetodon	lunula		Chaetodon_lunula	1	unknown	Mass	146	0.47			unknown		Bauchot R, Diagne M, Platel R, Ridet J-M, Bauchot M-L. in Fishbase. www.fishbase.org. date of access: Apr.-13-17
Perciformes	Perciformes	Chaetodontidae	Chaetodon	lunula		Chaetodon_lunula	2	unknown	Mass	137.75	0.478			unknown		Iglesias TL et al. (2015) J. Evol. Biol. 28:1080-1090
Perciformes	Perciformes	Chaetodontidae	Chaetodon	melannotus		Chaetodon_melannotus	1	unknown	Mass	67.5	0.3227	12		unknown	Strongylochaetodon melannotus	Bauchot R et al. (1989) Env. Biol. Fish. 25: 205-219	Red Sea
Perciformes	Perciformes	Chaetodontidae	Chaetodon	melannotus		Chaetodon_melannotus	1	unknown	Mass	20	0.176			unknown		Bauchot R, Diagne M, Platel R, Ridet J-M, Bauchot M-L. in Fishbase. www.fishbase.org. date of access: Apr.-13-17
Perciformes	Perciformes	Chaetodontidae	Chaetodon	melannotus		Chaetodon_melannotus	1	unknown	Mass	40	0.142			unknown		Nilsson GE et al. (2000) Proc. R. Soc. B 267:1335-1339	Heron Island
Perciformes	Perciformes	Chaetodontidae	Chaetodon	mertensii		Chaetodon_mertensii	2	unknown	Mass	53.2	0.247	11		Adult	Rhonbochaetodon mertensii	Bauchot R et al. (1989) Env. Biol. Fish. 25: 205-219	New Caledonia, Hawaii
Perciformes	Perciformes	Chaetodontidae	Chaetodon	mertensii		Chaetodon_mertensii	1	unknown	Mass	24	0.178			unknown		Bauchot R, Diagne M, Platel R, Ridet J-M, Bauchot M-L. in Fishbase. www.fishbase.org. date of access: Apr.-13-17
Perciformes	Perciformes	Chaetodontidae	Chaetodon	mertensii		Chaetodon_mertensii	1	unknown	Mass	24.2	0.154			unknown		Bauchot R, Diagne M, Platel R, Ridet J-M, Bauchot M-L. in Fishbase. www.fishbase.org. date of access: Apr.-13-17
Perciformes	Perciformes	Chaetodontidae	Chaetodon	miliaris		Chaetodon_miliaris	5	unknown	Mass	89.8	0.2884	13		Adult	Hetetochaetodon miliaris	Bauchot R et al. (1989) Env. Biol. Fish. 25: 205-219	Hawaii
Perciformes	Perciformes	Chaetodontidae	Chaetodon	miliaris		Chaetodon_miliaris	1	unknown	Mass	39.8	0.165			unknown		Bauchot R, Diagne M, Platel R, Ridet J-M, Bauchot M-L. in Fishbase. www.fishbase.org. date of access: Apr.-13-17
Perciformes	Perciformes	Chaetodontidae	Chaetodon	miliaris		Chaetodon_miliaris	1	unknown	Mass	40.9	0.192			unknown		Bauchot R, Diagne M, Platel R, Ridet J-M, Bauchot M-L. in Fishbase. www.fishbase.org. date of access: Apr.-13-17
Perciformes	Perciformes	Chaetodontidae	Chaetodon	miliaris		Chaetodon_miliaris	1	unknown	Mass	47.1	0.198			unknown		Bauchot R, Diagne M, Platel R, Ridet J-M, Bauchot M-L. in Fishbase. www.fishbase.org. date of access: Apr.-13-17
Perciformes	Perciformes	Chaetodontidae	Chaetodon	miliaris		Chaetodon_miliaris	1	unknown	Mass	53.3	0.213			unknown		Bauchot R, Diagne M, Platel R, Ridet J-M, Bauchot M-L. in Fishbase. www.fishbase.org. date of access: Apr.-13-17
Perciformes	Perciformes	Chaetodontidae	Chaetodon	miliaris		Chaetodon_miliaris	1	unknown	Mass	63.2	0.238			unknown		Bauchot R, Diagne M, Platel R, Ridet J-M, Bauchot M-L. in Fishbase. www.fishbase.org. date of access: Apr.-13-17
Perciformes	Perciformes	Chaetodontidae	Chaetodon	multicinctus		Chaetodon_multicinctus	2	unknown	Mass	38	0.1963	10		Adult	Exornator multicinctus	Bauchot R et al. (1989) Env. Biol. Fish. 25: 205-219	Hawaii
Perciformes	Perciformes	Chaetodontidae	Chaetodon	multicinctus		Chaetodon_multicinctus	1	unknown	Mass	28.7	0.162			unknown		Bauchot R, Diagne M, Platel R, Ridet J-M, Bauchot M-L. in Fishbase. www.fishbase.org. date of access: Apr.-13-17
Perciformes	Perciformes	Chaetodontidae	Chaetodon	multicinctus		Chaetodon_multicinctus	1	unknown	Mass	29.4	0.185			unknown		Bauchot R, Diagne M, Platel R, Ridet J-M, Bauchot M-L. in Fishbase. www.fishbase.org. date of access: Apr.-13-17
Perciformes	Perciformes	Chaetodontidae	Chaetodon	ocellatus		Chaetodon_ocellatus	1	unknown	Mass	55.6	0.352			unknown		Chin, X. (1996) A photographic atlas of brains of common Caribbean reef fishes. Division of Natural Sciences, New College of the University of South Florida. 62 p.
Perciformes	Perciformes	Chaetodontidae	Chaetodon	ocellatus		Chaetodon_ocellatus	1	unknown	Mass	88.53	0.372			unknown		Iglesias TL et al. (2015) J. Evol. Biol. 28:1080-1090
Perciformes	Perciformes	Chaetodontidae	Chaetodon	ornatissimus		Chaetodon_ornatissimus	1	unknown	Mass	297.2	0.4927	17		Adult	Citharoedus ornatissimus	Bauchot R et al. (1989) Env. Biol. Fish. 25: 205-219	Marshall
Perciformes	Perciformes	Chaetodontidae	Chaetodon	ornatissimus		Chaetodon_ornatissimus	1	unknown	Mass	85	0.284			unknown		Bauchot R, Diagne M, Platel R, Ridet J-M, Bauchot M-L. in Fishbase. www.fishbase.org. date of access: Apr.-13-17
Perciformes	Perciformes	Chaetodontidae	Chaetodon	ornatissimus		Chaetodon_ornatissimus	1	unknown	Mass	84.35	0.313			unknown		Iglesias TL et al. (2015) J. Evol. Biol. 28:1080-1090
Perciformes	Perciformes	Chaetodontidae	Chaetodon	paucifasciatus		Chaetodon_paucifasciatus	2	unknown	Mass	62	0.2416	11		Adult	Exanator paucifasciatus	Bauchot R et al. (1989) Env. Biol. Fish. 25: 205-219	Red Sea
Perciformes	Perciformes	Chaetodontidae	Chaetodon	paucifasciatus		Chaetodon_paucifasciatus	1	unknown	Mass	23	0.164			unknown		Bauchot R, Diagne M, Platel R, Ridet J-M, Bauchot M-L. in Fishbase. www.fishbase.org. date of access: Apr.-13-17
Perciformes	Perciformes	Chaetodontidae	Chaetodon	paucifasciatus		Chaetodon_paucifasciatus	1	unknown	Mass	40	0.167			unknown		Bauchot R, Diagne M, Platel R, Ridet J-M, Bauchot M-L. in Fishbase. www.fishbase.org. date of access: Apr.-13-17
Perciformes	Perciformes	Chaetodontidae	Chaetodon	plebeius		Chaetodon_plebeius	1	unknown	Mass	49.4	0.2214	11		Adult	Megaprotodon plebeius	Bauchot R et al. (1989) Env. Biol. Fish. 25: 205-219	New Caledonia
Perciformes	Perciformes	Chaetodontidae	Chaetodon	plebeius		Chaetodon_plebeius	1	unknown	Mass	17.6	0.129			unknown		Bauchot R, Diagne M, Platel R, Ridet J-M, Bauchot M-L. in Fishbase. www.fishbase.org. date of access: Apr.-13-17
Perciformes	Perciformes	Chaetodontidae	Chaetodon	quadrimaculatus		Chaetodon_quadrimaculatus	1	unknown	Mass	57	0.2594	11		Adult	Lepidochaetodon quadrimaculatus	Bauchot R et al. (1989) Env. Biol. Fish. 25: 205-219	Marshall
Perciformes	Perciformes	Chaetodontidae	Chaetodon	quadrimaculatus		Chaetodon_quadrimaculatus	1	unknown	Mass	51.2	0.261			unknown		Bauchot R, Diagne M, Platel R, Ridet J-M, Bauchot M-L. in Fishbase. www.fishbase.org. date of access: Apr.-13-17
Perciformes	Perciformes	Chaetodontidae	Chaetodon	reticulatus		Chaetodon_reticulatus	2	unknown	Mass	150.3	0.4051	15		Adult		Bauchot R et al. (1989) Env. Biol. Fish. 25: 205-219	Marshall
Perciformes	Perciformes	Chaetodontidae	Chaetodon	reticulatus		Chaetodon_reticulatus	1	unknown	Mass	75.5	0.317			unknown		Bauchot R, Diagne M, Platel R, Ridet J-M, Bauchot M-L. in Fishbase. www.fishbase.org. date of access: Apr.-13-17
Perciformes	Perciformes	Chaetodontidae	Chaetodon	reticulatus		Chaetodon_reticulatus	1	unknown	Mass	140	0.366			unknown		Bauchot R, Diagne M, Platel R, Ridet J-M, Bauchot M-L. in Fishbase. www.fishbase.org. date of access: Apr.-13-17
Perciformes	Perciformes	Chaetodontidae	Chaetodon	reticulatus		Chaetodon_reticulatus	1	unknown	Mass	81.17	0.292			unknown		Iglesias TL et al. (2015) J. Evol. Biol. 28:1080-1090
Perciformes	Perciformes	Chaetodontidae	Chaetodon	speculum		Chaetodon_speculum	1	unknown	Mass	73.7	0.2713			unknown		Bauchot R et al. (1989) Env. Biol. Fish. 25: 205-219
Perciformes	Perciformes	Chaetodontidae	Chaetodon	speculum		Chaetodon_speculum	1	unknown	Mass	18	0.133			unknown		Bauchot R, Diagne M, Platel R, Ridet J-M, Bauchot M-L. in Fishbase. www.fishbase.org. date of access: Apr.-13-17
Perciformes	Perciformes	Chaetodontidae	Chaetodon	striatus		Chaetodon_striatus	2	unknown	Mass	98	0.347			unknown		Iglesias TL et al. (2015) J. Evol. Biol. 28:1080-1090
Perciformes	Perciformes	Chaetodontidae	Chaetodon	trifascialis		Chaetodon_trifascialis	1	unknown	Mass	86.6	0.3518	13		unknown		Bauchot R et al. (1989) Env. Biol. Fish. 25: 205-219	Marshall
Perciformes	Perciformes	Chaetodontidae	Chaetodon	trifascialis		Chaetodon_trifascialis	1	unknown	Mass	77	0.333	12.6	14.7	unknown		Bauchot R, Diagne M, Platel R, Ridet J-M, Bauchot M-L. in Fishbase. www.fishbase.org. date of access: Apr.-13-17
Perciformes	Perciformes	Chaetodontidae	Chaetodon	trifasciatus		Chaetodon_trifasciatus	2	unknown	Mass	62.5	0.2553			unknown		Bauchot R et al. (1989) Env. Biol. Fish. 25: 205-219
Perciformes	Perciformes	Chaetodontidae	Chaetodon	trifasciatus		Chaetodon_trifasciatus	1	unknown	Mass	36.5	0.198			unknown		Bauchot R, Diagne M, Platel R, Ridet J-M, Bauchot M-L. in Fishbase. www.fishbase.org. date of access: Apr.-13-17
Perciformes	Perciformes	Chaetodontidae	Chaetodon	trifasciatus		Chaetodon_trifasciatus	1	unknown	Mass	41.5	0.208			unknown		Bauchot R, Diagne M, Platel R, Ridet J-M, Bauchot M-L. in Fishbase. www.fishbase.org. date of access: Apr.-13-17
Perciformes	Perciformes	Chaetodontidae	Chaetodon	trifasciatus		Chaetodon_trifasciatus	1	unknown	Mass	45.5	0.219			unknown		Bauchot R, Diagne M, Platel R, Ridet J-M, Bauchot M-L. in Fishbase. www.fishbase.org. date of access: Apr.-13-17
Perciformes	Perciformes	Chaetodontidae	Chaetodon	ulietensis		Chaetodon_ulietensis	1	unknown	Mass	90.2	0.3353			unknown		Bauchot R et al. (1989) Env. Biol. Fish. 25: 205-219
Perciformes	Perciformes	Chaetodontidae	Chaetodon	ulietensis		Chaetodon_ulietensis	1	unknown	Mass	54	0.263			unknown		Bauchot R, Diagne M, Platel R, Ridet J-M, Bauchot M-L. in Fishbase. www.fishbase.org. date of access: Apr.-13-17
Perciformes	Perciformes	Chaetodontidae	Chaetodon	ulietensis		Chaetodon_ulietensis	1	unknown	Mass	35.5	0.231			unknown		Iglesias TL et al. (2015) J. Evol. Biol. 28:1080-1090
Perciformes	Perciformes	Chaetodontidae	Chaetodon	unimaculatus		Chaetodon_unimaculatus	2	unknown	Mass	95.9	0.2927			unknown		Bauchot R et al. (1989) Env. Biol. Fish. 25: 205-219
Perciformes	Perciformes	Chaetodontidae	Chaetodon	unimaculatus		Chaetodon_unimaculatus	1	unknown	Mass	25.2	0.169			unknown		Bauchot R, Diagne M, Platel R, Ridet J-M, Bauchot M-L. in Fishbase. www.fishbase.org. date of access: Apr.-13-17
Perciformes	Perciformes	Chaetodontidae	Chaetodon	unimaculatus		Chaetodon_unimaculatus	1	unknown	Mass	21	0.135			unknown		Bauchot R, Diagne M, Platel R, Ridet J-M, Bauchot M-L. in Fishbase. www.fishbase.org. date of access: Apr.-13-17
Perciformes	Perciformes	Chaetodontidae	Forcipiger	flavissimus		Forcipiger_flavissimus	5	unknown	Mass	80.8	0.3381	16		unknown		Bauchot R et al. (1989) Env. Biol. Fish. 25: 205-219	Hawaii, Marshall
Perciformes	Perciformes	Chaetodontidae	Forcipiger	flavissimus		Forcipiger_flavissimus	1	unknown	Mass	20.9	0.191	10.5	13.6	unknown		Bauchot R, Diagne M, Platel R, Ridet J-M, Bauchot M-L. in Fishbase. www.fishbase.org. date of access: Apr.-13-17
Perciformes	Perciformes	Chaetodontidae	Forcipiger	flavissimus		Forcipiger_flavissimus	1	unknown	Mass	40.5	0.239			unknown		Bauchot R, Diagne M, Platel R, Ridet J-M, Bauchot M-L. in Fishbase. www.fishbase.org. date of access: Apr.-13-17
Perciformes	Perciformes	Chaetodontidae	Forcipiger	flavissimus		Forcipiger_flavissimus	1	unknown	Mass	52.8	0.277	13.5	15.3	unknown		Bauchot R, Diagne M, Platel R, Ridet J-M, Bauchot M-L. in Fishbase. www.fishbase.org. date of access: Apr.-13-17
Perciformes	Perciformes	Chaetodontidae	Forcipiger	flavissimus		Forcipiger_flavissimus	1	unknown	Mass	32.6	0.244			unknown		Bauchot R, Diagne M, Platel R, Ridet J-M, Bauchot M-L. in Fishbase. www.fishbase.org. date of access: Apr.-13-17
Perciformes	Perciformes	Chaetodontidae	Forcipiger	flavissimus		Forcipiger_flavissimus	1	unknown	Mass	52.6	0.227	13	14.9	unknown		Bauchot R, Diagne M, Platel R, Ridet J-M, Bauchot M-L. in Fishbase. www.fishbase.org. date of access: Apr.-13-17
Perciformes	Perciformes	Chaetodontidae	Forcipiger	flavissimus		Forcipiger_flavissimus	1	unknown	Mass	39.17	0.276			unknown		Iglesias TL et al. (2015) J. Evol. Biol. 28:1080-1090
Perciformes	Perciformes	Chaetodontidae	Forcipiger	longirostris		Forcipiger_longirostris	1	unknown	Mass	110.3	0.359	18		unknown		Bauchot R et al. (1989) Env. Biol. Fish. 25: 205-219	Hawaii
Perciformes	Perciformes	Chaetodontidae	Forcipiger	longirostris		Forcipiger_longirostris	1	unknown	Mass	70.4	0.313	15.5	17.2	unknown		Bauchot R, Diagne M, Platel R, Ridet J-M, Bauchot M-L. in Fishbase. www.fishbase.org. date of access: Apr.-13-17
Perciformes	Perciformes	Chaetodontidae	Hemitaurichthys	polylepis		Hemitaurichthys_polylepis	1	unknown	Mass	96.8	0.3131	13		unknown		Bauchot R et al. (1989) Env. Biol. Fish. 25: 205-219	Marshall
Perciformes	Perciformes	Chaetodontidae	Hemitaurichthys	polylepis		Hemitaurichthys_polylepis	1	unknown	Mass	34.3	0.19	9.2	10.9	unknown		Bauchot R, Diagne M, Platel R, Ridet J-M, Bauchot M-L. in Fishbase. www.fishbase.org. date of access: Apr.-13-17
Perciformes	Perciformes	Chaetodontidae	Heniochus	acuminatus		Heniochus_acuminatus	2	unknown	Mass	190.4	0.4623	16		unknown		Bauchot R et al. (1989) Env. Biol. Fish. 25: 205-219	Reunion
Perciformes	Perciformes	Chaetodontidae	Heniochus	acuminatus		Heniochus_acuminatus	1	unknown	Mass	25.5	0.193	8.3	11.3	unknown		Bauchot R, Diagne M, Platel R, Ridet J-M, Bauchot M-L. in Fishbase. www.fishbase.org. date of access: Apr.-13-17
Perciformes	Perciformes	Chaetodontidae	Heniochus	acuminatus		Heniochus_acuminatus	1	unknown	Mass	113	0.323	13.1	15.5	unknown		Bauchot R, Diagne M, Platel R, Ridet J-M, Bauchot M-L. in Fishbase. www.fishbase.org. date of access: Apr.-13-17
Perciformes	Perciformes	Chaetodontidae	Heniochus	chrysostomus		Heniochus_chrysostomus	1	unknown	Mass	174.2	0.4562	15		unknown		Bauchot R et al. (1989) Env. Biol. Fish. 25: 205-219	Marshall
Perciformes	Perciformes	Chaetodontidae	Heniochus	chrysostomus		Heniochus_chrysostomus	2	unknown	Mass	78.5	0.318	11.5	14	unknown		Iglesias TL et al. (2015) J. Evol. Biol. 28:1080-1090
Perciformes	Perciformes	Chaetodontidae	Heniochus	intermedius		Heniochus_intermedius	1	unknown	Mass	291.4	0.3818	16		unknown		Bauchot R et al. (1989) Env. Biol. Fish. 25: 205-219	Red Sea
Perciformes	Perciformes	Chaetodontidae	Heniochus	monoceros		Heniochus_monoceros	1	unknown	Mass	496.6	0.6141	22		unknown		Bauchot R et al. (1989) Env. Biol. Fish. 25: 205-219	Marshall
Perciformes	Perciformes	Chaetodontidae	Heniochus	monoceros		Heniochus_monoceros	1	unknown	Mass	272	0.481	18	20.5	unknown		Bauchot R, Diagne M, Platel R, Ridet J-M, Bauchot M-L. in Fishbase. www.fishbase.org. date of access: Apr.-13-17
Perciformes	Perciformes	Chaetodontidae	Heniochus	singularius		Heniochus_singularius	1	unknown	Mass	614.1	0.6358	23		unknown		Bauchot R et al. (1989) Env. Biol. Fish. 25: 205-219	New Caledonia
Perciformes	Perciformes	Chaetodontidae	Heniochus	singularius		Heniochus_singularius	1	unknown	Mass	248	0.406	17.2	20.2	unknown		Bauchot R, Diagne M, Platel R, Ridet J-M, Bauchot M-L. in Fishbase. www.fishbase.org. date of access: Apr.-13-17
Perciformes	Perciformes	Chaetodontidae	Heniochus	varius		Heniochus_varius	1	unknown	Mass	283.7	0.4977	13		unknown		Bauchot R et al. (1989) Env. Biol. Fish. 25: 205-219	New Caledonia
Perciformes	Perciformes	Chaetodontidae	Heniochus	varius		Heniochus_varius	1	unknown	Mass	95	0.308	12.5	15.6	unknown		Bauchot R, Diagne M, Platel R, Ridet J-M, Bauchot M-L. in Fishbase. www.fishbase.org. date of access: Apr.-13-17
Perciformes	Perciformes	Channichthyidae	Champsocephalus	gunnari		Champsocephalus_gunnari	1	unknown	Mass	175	0.301	24.7		Adult		Bauchot R, Diagne M, Platel R, Ridet J-M, Bauchot M-L. in Fishbase. www.fishbase.org. date of access: Apr.-13-17
Perciformes	Perciformes	Channichthyidae	Champsocephalus	gunnari		Champsocephalus_gunnari	1	unknown	Mass	125	0.264	25.2		Adult		Bauchot R, Diagne M, Platel R, Ridet J-M, Bauchot M-L. in Fishbase. www.fishbase.org. date of access: Apr.-13-17
Perciformes	Perciformes	Channichthyidae	Champsocephalus	gunnari		Champsocephalus_gunnari	1	unknown	Mass	17	0.094	13.5		unknown		Bauchot R, Diagne M, Platel R, Ridet J-M, Bauchot M-L. in Fishbase. www.fishbase.org. date of access: Apr.-13-17
Perciformes	Perciformes	Channichthyidae	Champsocephalus	gunnari		Champsocephalus_gunnari	1	unknown	Mass	23	0.101	15		unknown		Bauchot R, Diagne M, Platel R, Ridet J-M, Bauchot M-L. in Fishbase. www.fishbase.org. date of access: Apr.-13-17
Perciformes	Perciformes	Channichthyidae	Channichthys	rhinoceratus		Channichthys_rhinoceratus	1	unknown	Mass	150	0.304			unknown		Bauchot R, Diagne M, Platel R, Ridet J-M, Bauchot M-L. in Fishbase. www.fishbase.org. date of access: Apr.-13-17
Perciformes	Perciformes	Channichthyidae	Channichthys	rhinoceratus		Channichthys_rhinoceratus	1	unknown	Mass	400	0.448			unknown		Bauchot R, Diagne M, Platel R, Ridet J-M, Bauchot M-L. in Fishbase. www.fishbase.org. date of access: Apr.-13-17
Perciformes	Perciformes	Channichthyidae	Channichthys	rhinoceratus		Channichthys_rhinoceratus	1	unknown	Mass	450	0.417			unknown		Bauchot R, Diagne M, Platel R, Ridet J-M, Bauchot M-L. in Fishbase. www.fishbase.org. date of access: Apr.-13-17
Perciformes	Perciformes	Channichthyidae	Channichthys	rhinoceratus		Channichthys_rhinoceratus	1	unknown	Mass	500	0.389			unknown		Bauchot R, Diagne M, Platel R, Ridet J-M, Bauchot M-L. in Fishbase. www.fishbase.org. date of access: Apr.-13-17
Anabantiformes	Perciformes	Channidae	Channa	orientalis		Channa_orientalis	1	unknown	Mass	210	0.285			unknown		Bauchot R, Diagne M, Platel R, Ridet J-M, Bauchot M-L. in Fishbase. www.fishbase.org. date of access: Apr.-13-17
Cichliformes	Perciformes	Cichlidae	Altolamprologus	compressiceps		Altolamprologus_compressiceps	1	f	Mass	7.37	0.067			Adult		Gonzalez-Voyer A et al. (2009) Proc. R. Soc. B 276: 161-167	Wild caught specimen purchased through acquarium trading
Cichliformes	Perciformes	Cichlidae	Altolamprologus	compressiceps		Altolamprologus_compressiceps	1	f	Mass	4.86	0.057			Adult		Gonzalez-Voyer A et al. (2009) Proc. R. Soc. B 276: 161-167	Wild caught specimen purchased through acquarium trading
Cichliformes	Perciformes	Cichlidae	Altolamprologus	compressiceps		Altolamprologus_compressiceps	1	f	Mass	11.33	0.068			Adult		Gonzalez-Voyer A et al. (2009) Proc. R. Soc. B 276: 161-167	Wild caught specimen purchased through acquarium trading
Cichliformes	Perciformes	Cichlidae	Altolamprologus	compressiceps		Altolamprologus_compressiceps	1	f	Mass	7.87	0.076			Adult		Gonzalez-Voyer A et al. (2009) Proc. R. Soc. B 276: 161-167	Wild caught specimen purchased through acquarium trading
Cichliformes	Perciformes	Cichlidae	Altolamprologus	compressiceps		Altolamprologus_compressiceps	1	f	Mass	5.6	0.059			Adult		Gonzalez-Voyer A et al. (2009) Proc. R. Soc. B 276: 161-167	Wild caught specimen purchased through acquarium trading
Cichliformes	Perciformes	Cichlidae	Altolamprologus	compressiceps		Altolamprologus_compressiceps	1	f	Mass	10.8	0.0708			Adult		Tsuboi M et al. (2015) Evolution 69:190-200	Lake Tanganyika, Mpulungu, Zambia
Cichliformes	Perciformes	Cichlidae	Altolamprologus	compressiceps		Altolamprologus_compressiceps	1	f	Mass	6.7	0.0599			Adult		Tsuboi M et al. (2015) Evolution 69:190-200	Lake Tanganyika, Mpulungu, Zambia
Cichliformes	Perciformes	Cichlidae	Altolamprologus	compressiceps		Altolamprologus_compressiceps	1	f	Mass	5.3	0.0537			Adult		Tsuboi M et al. (2015) Evolution 69:190-200	Lake Tanganyika, Mpulungu, Zambia
Cichliformes	Perciformes	Cichlidae	Altolamprologus	compressiceps		Altolamprologus_compressiceps	1	f	Mass	7.2	0.0631			Adult		Tsuboi M et al. (2015) Evolution 69:190-200	Lake Tanganyika, Mpulungu, Zambia
Cichliformes	Perciformes	Cichlidae	Altolamprologus	compressiceps		Altolamprologus_compressiceps	1	f	Mass	7.3	0.0671			Adult		Tsuboi M et al. (2015) Evolution 69:190-200	Lake Tanganyika, Mpulungu, Zambia
Cichliformes	Perciformes	Cichlidae	Altolamprologus	compressiceps		Altolamprologus_compressiceps	1	f	Mass	6.9	0.0588			Adult		Tsuboi M et al. (2015) Evolution 69:190-200	Lake Tanganyika, Mpulungu, Zambia
Cichliformes	Perciformes	Cichlidae	Altolamprologus	compressiceps		Altolamprologus_compressiceps	1	f	Mass	8.4	0.0688			Adult		Tsuboi M et al. (2015) Evolution 69:190-200	Lake Tanganyika, Mpulungu, Zambia
Cichliformes	Perciformes	Cichlidae	Altolamprologus	compressiceps		Altolamprologus_compressiceps	1	f	Mass	8.5	0.0657			Adult		Tsuboi M et al. (2015) Evolution 69:190-200	Lake Tanganyika, Mpulungu, Zambia
Cichliformes	Perciformes	Cichlidae	Altolamprologus	compressiceps		Altolamprologus_compressiceps	1	f	Mass	3.9	0.0473			Adult		Tsuboi M et al. (2015) Evolution 69:190-200	Lake Tanganyika, Mpulungu, Zambia
Cichliformes	Perciformes	Cichlidae	Altolamprologus	compressiceps		Altolamprologus_compressiceps	1	f	Mass	3.5	0.0436			Adult		Tsuboi M et al. (2015) Evolution 69:190-200	Lake Tanganyika, Mpulungu, Zambia
Cichliformes	Perciformes	Cichlidae	Altolamprologus	compressiceps		Altolamprologus_compressiceps	1	f	Mass	4.9	0.0528			Adult		Tsuboi M et al. (2015) Evolution 69:190-200	Lake Tanganyika, Mpulungu, Zambia
Cichliformes	Perciformes	Cichlidae	Altolamprologus	compressiceps		Altolamprologus_compressiceps	1	m	Mass	23.35	0.091			Adult		Gonzalez-Voyer A et al. (2009) Proc. R. Soc. B 276: 161-167	Wild caught specimen purchased through acquarium trading
Cichliformes	Perciformes	Cichlidae	Altolamprologus	compressiceps		Altolamprologus_compressiceps	1	m	Mass	10.5	0.0717			Adult		Tsuboi M et al. (2015) Evolution 69:190-200	Lake Tanganyika, Mpulungu, Zambia
Cichliformes	Perciformes	Cichlidae	Altolamprologus	compressiceps		Altolamprologus_compressiceps	1	m	Mass	15.6	0.0833			Adult		Tsuboi M et al. (2015) Evolution 69:190-200	Lake Tanganyika, Mpulungu, Zambia
Cichliformes	Perciformes	Cichlidae	Altolamprologus	compressiceps		Altolamprologus_compressiceps	1	m	Mass	14.5	0.0842			Adult		Tsuboi M et al. (2015) Evolution 69:190-200	Lake Tanganyika, Mpulungu, Zambia
Cichliformes	Perciformes	Cichlidae	Altolamprologus	compressiceps		Altolamprologus_compressiceps	1	m	Mass	13.6	0.081			Adult		Tsuboi M et al. (2015) Evolution 69:190-200	Lake Tanganyika, Mpulungu, Zambia
Cichliformes	Perciformes	Cichlidae	Altolamprologus	faciatus		Altolamprologus_faciatus	1	unknown	Mass	7.08	0.064			Adult		Tsuboi M et al. (2015) Evolution 69:190-200	Lake Tanganyika, Mpulungu, Zambia
Cichliformes	Perciformes	Cichlidae	Amatitlania	nigrofasciata		Amatitlania_nigrofasciata	1	unknown	Mass	34.1	0.0856			unknown		Bauchot R, Diagne M, Platel R, Ridet J-M, Bauchot M-L. in Fishbase. www.fishbase.org. date of access: Apr.-13-17
Cichliformes	Perciformes	Cichlidae	Amatitlania	nigrofasciata		Amatitlania_nigrofasciata	1	unknown	Mass	36.5	0.093			unknown		Bauchot R, Diagne M, Platel R, Ridet J-M, Bauchot M-L. in Fishbase. www.fishbase.org. date of access: Apr.-13-17
Cichliformes	Perciformes	Cichlidae	Astronotus	ocellatus		Astronotus_ocellatus	1	unknown	Mass	395	0.32			unknown		Bauchot R, Diagne M, Platel R, Ridet J-M, Bauchot M-L. in Fishbase. www.fishbase.org. date of access: Apr.-13-17
Cichliformes	Perciformes	Cichlidae	Aulonocranus	dewindti		Aulonocranus_dewindti	1	f	Mass	13.2	0.088			Adult		Gonzalez-Voyer A et al. (2009) Proc. R. Soc. B 276: 161-167	Wild caught specimen purchased through acquarium trading
Cichliformes	Perciformes	Cichlidae	Aulonocranus	dewindti		Aulonocranus_dewindti	1	f	Mass	7.7	0.074			Adult		Gonzalez-Voyer A et al. (2009) Proc. R. Soc. B 276: 161-167	Wild caught specimen purchased through acquarium trading
Cichliformes	Perciformes	Cichlidae	Aulonocranus	dewindti		Aulonocranus_dewindti	1	m	Mass	9.69	0.074			Adult		Gonzalez-Voyer A et al. (2009) Proc. R. Soc. B 276: 161-167	Wild caught specimen purchased through acquarium trading
Cichliformes	Perciformes	Cichlidae	Aulonocranus	dewindti		Aulonocranus_dewindti	1	m	Mass	11.17	0.076			Adult		Gonzalez-Voyer A et al. (2009) Proc. R. Soc. B 276: 161-167	Wild caught specimen purchased through acquarium trading
Cichliformes	Perciformes	Cichlidae	Aulonocranus	dewindti		Aulonocranus_dewindti	1	m	Mass	10.63	0.085			Adult		Gonzalez-Voyer A et al. (2009) Proc. R. Soc. B 276: 161-167	Wild caught specimen purchased through acquarium trading
Cichliformes	Perciformes	Cichlidae	Aulonocranus	dewindti		Aulonocranus_dewindti	1	m	Mass	13.55	0.082			Adult		Gonzalez-Voyer A et al. (2009) Proc. R. Soc. B 276: 161-167	Wild caught specimen purchased through acquarium trading
Cichliformes	Perciformes	Cichlidae	Aulonocranus	dewindti		Aulonocranus_dewindti	1	m	Mass	20.4	0.1167			Adult		Tsuboi M et al. (2015) Evolution 69:190-200	Lake Tanganyika, Mpulungu, Zambia
Cichliformes	Perciformes	Cichlidae	Aulonocranus	dewindti		Aulonocranus_dewindti	1	m	Mass	18.1	0.1373			Adult		Tsuboi M et al. (2015) Evolution 69:190-200	Lake Tanganyika, Mpulungu, Zambia
Cichliformes	Perciformes	Cichlidae	Aulonocranus	dewindti		Aulonocranus_dewindti	1	m	Mass	17.3	0.1259			Adult		Tsuboi M et al. (2015) Evolution 69:190-200	Lake Tanganyika, Mpulungu, Zambia
Cichliformes	Perciformes	Cichlidae	Aulonocranus	dewindti		Aulonocranus_dewindti	1	m	Mass	16.5	0.1017			Adult		Tsuboi M et al. (2015) Evolution 69:190-200	Lake Tanganyika, Mpulungu, Zambia
Cichliformes	Perciformes	Cichlidae	Aulonocranus	dewindti		Aulonocranus_dewindti	1	m	Mass	16.8	0.1132			Adult		Tsuboi M et al. (2015) Evolution 69:190-200	Lake Tanganyika, Mpulungu, Zambia
Cichliformes	Perciformes	Cichlidae	Aulonocranus	dewindti		Aulonocranus_dewindti	1	m	Mass	19.5	0.1082			Adult		Tsuboi M et al. (2015) Evolution 69:190-200	Lake Tanganyika, Mpulungu, Zambia
Cichliformes	Perciformes	Cichlidae	Aulonocranus	dewindti		Aulonocranus_dewindti	1	m	Mass	15.6	0.1151			Adult		Tsuboi M et al. (2015) Evolution 69:190-200	Lake Tanganyika, Mpulungu, Zambia
Cichliformes	Perciformes	Cichlidae	Aulonocranus	dewindti		Aulonocranus_dewindti	1	m	Mass	20.3	0.1083			Adult		Tsuboi M et al. (2015) Evolution 69:190-200	Lake Tanganyika, Mpulungu, Zambia
Cichliformes	Perciformes	Cichlidae	Aulonocranus	dewindti		Aulonocranus_dewindti	1	m	Mass	16.6	0.123			Adult		Tsuboi M et al. (2015) Evolution 69:190-200	Lake Tanganyika, Mpulungu, Zambia
Cichliformes	Perciformes	Cichlidae	Aulonocranus	dewindti		Aulonocranus_dewindti	1	m	Mass	18.7	0.141			Adult		Tsuboi M et al. (2015) Evolution 69:190-200	Lake Tanganyika, Mpulungu, Zambia
Cichliformes	Perciformes	Cichlidae	Aulonocranus	dewindti		Aulonocranus_dewindti	1	m	Mass	19.3	0.119			Adult		Tsuboi M et al. (2015) Evolution 69:190-200	Lake Tanganyika, Mpulungu, Zambia
Cichliformes	Perciformes	Cichlidae	Aulonocranus	dewindti		Aulonocranus_dewindti	1	m	Mass	21.4	0.1308			Adult		Tsuboi M et al. (2015) Evolution 69:190-200	Lake Tanganyika, Mpulungu, Zambia
Cichliformes	Perciformes	Cichlidae	Aulonocranus	dewindti		Aulonocranus_dewindti	1	m	Mass	17.3	0.1316			Adult		Tsuboi M et al. (2015) Evolution 69:190-200	Lake Tanganyika, Mpulungu, Zambia
Cichliformes	Perciformes	Cichlidae	Aulonocranus	dewindti		Aulonocranus_dewindti	1	m	Mass	17	0.1236			Adult		Tsuboi M et al. (2015) Evolution 69:190-200	Lake Tanganyika, Mpulungu, Zambia
Cichliformes	Perciformes	Cichlidae	Baileychromis	centropomoides		Baileychromis_centropomoides	1	f	Mass	27.8	0.1189			Adult		Tsuboi M et al. (2015) Evolution 69:190-200	Lake Tanganyika, Mpulungu, Zambia
Cichliformes	Perciformes	Cichlidae	Baileychromis	centropomoides		Baileychromis_centropomoides	1	m	Mass	37.6	0.1507			Adult		Tsuboi M et al. (2015) Evolution 69:190-200	Lake Tanganyika, Mpulungu, Zambia
Cichliformes	Perciformes	Cichlidae	Baileychromis	centropomoides		Baileychromis_centropomoides	1	m	Mass	35.6	0.1501			Adult		Tsuboi M et al. (2015) Evolution 69:190-200	Lake Tanganyika, Mpulungu, Zambia
Cichliformes	Perciformes	Cichlidae	Baileychromis	centropomoides		Baileychromis_centropomoides	1	m	Mass	43	0.1331			Adult		Tsuboi M et al. (2015) Evolution 69:190-200	Lake Tanganyika, Mpulungu, Zambia
Cichliformes	Perciformes	Cichlidae	Bathybates	fasciatus		Bathybates_fasciatus	1	m	Mass	182.1	0.283			Adult		Tsuboi M et al. (2015) Evolution 69:190-200	Lake Tanganyika, Mpulungu, Zambia
Cichliformes	Perciformes	Cichlidae	Bathybates	fasciatus		Bathybates_fasciatus	1	m	Mass	105.3	0.2017			Adult		Tsuboi M et al. (2015) Evolution 69:190-200	Lake Tanganyika, Mpulungu, Zambia
Cichliformes	Perciformes	Cichlidae	Bathybates	fasciatus		Bathybates_fasciatus	1	m	Mass	34.7	0.1331			Adult		Tsuboi M et al. (2015) Evolution 69:190-200	Lake Tanganyika, Mpulungu, Zambia
Cichliformes	Perciformes	Cichlidae	Bathybates	fasciatus		Bathybates_fasciatus	1	m	Mass	57.4	0.177			Adult		Tsuboi M et al. (2015) Evolution 69:190-200	Lake Tanganyika, Mpulungu, Zambia
Cichliformes	Perciformes	Cichlidae	Bathybates	fasciatus		Bathybates_fasciatus	1	m	Mass	112.2	0.2562			Adult		Tsuboi M et al. (2015) Evolution 69:190-200	Lake Tanganyika, Mpulungu, Zambia
Cichliformes	Perciformes	Cichlidae	Bathybates	fasciatus		Bathybates_fasciatus	1	m	Mass	98.7	0.2421			Adult		Tsuboi M et al. (2015) Evolution 69:190-200	Lake Tanganyika, Mpulungu, Zambia
Cichliformes	Perciformes	Cichlidae	Bathybates	fasciatus		Bathybates_fasciatus	1	m	Mass	37.4	0.145			Adult		Tsuboi M et al. (2015) Evolution 69:190-200	Lake Tanganyika, Mpulungu, Zambia
Cichliformes	Perciformes	Cichlidae	Bathybates	fasciatus		Bathybates_fasciatus	1	m	Mass	9.1	0.0738			Adult		Tsuboi M et al. (2015) Evolution 69:190-200	Lake Tanganyika, Mpulungu, Zambia
Cichliformes	Perciformes	Cichlidae	Bathybates	fasciatus		Bathybates_fasciatus	1	m	Mass	16.3	0.0995			Adult		Tsuboi M et al. (2015) Evolution 69:190-200	Lake Tanganyika, Mpulungu, Zambia
Cichliformes	Perciformes	Cichlidae	Bathybates	fasciatus		Bathybates_fasciatus	1	m	Mass	57.2	0.1831			Adult		Tsuboi M et al. (2015) Evolution 69:190-200	Lake Tanganyika, Mpulungu, Zambia
Cichliformes	Perciformes	Cichlidae	Bathybates	fasciatus		Bathybates_fasciatus	1	m	Mass	49.2	0.182			Adult		Tsuboi M et al. (2015) Evolution 69:190-200	Lake Tanganyika, Mpulungu, Zambia
Cichliformes	Perciformes	Cichlidae	Bathybates	ferox		Bathybates_ferox	1	f	Mass	50.5	0.1911			Adult		Tsuboi M et al. (2015) Evolution 69:190-200	Lake Tanganyika, Mpulungu, Zambia
Cichliformes	Perciformes	Cichlidae	Bathybates	ferox		Bathybates_ferox	1	f	Mass	63.3	0.2154			Adult		Tsuboi M et al. (2015) Evolution 69:190-200	Lake Tanganyika, Mpulungu, Zambia
Cichliformes	Perciformes	Cichlidae	Bathybates	ferox		Bathybates_ferox	1	m	Mass	53.4	0.1939			Adult		Tsuboi M et al. (2015) Evolution 69:190-200	Lake Tanganyika, Mpulungu, Zambia
Cichliformes	Perciformes	Cichlidae	Bathybates	ferox		Bathybates_ferox	1	m	Mass	64.7	0.2475			Adult		Tsuboi M et al. (2015) Evolution 69:190-200	Lake Tanganyika, Mpulungu, Zambia
Cichliformes	Perciformes	Cichlidae	Bathybates	ferox		Bathybates_ferox	1	m	Mass	66.4	0.2481			Adult		Tsuboi M et al. (2015) Evolution 69:190-200	Lake Tanganyika, Mpulungu, Zambia
Cichliformes	Perciformes	Cichlidae	Bathybates	ferox		Bathybates_ferox	1	m	Mass	51.7	0.1692			Adult		Tsuboi M et al. (2015) Evolution 69:190-200	Lake Tanganyika, Mpulungu, Zambia
Cichliformes	Perciformes	Cichlidae	Bathybates	leo		Bathybates_leo	1	unknown	Mass	21.4	0.1113			Adult		Tsuboi M et al. (2015) Evolution 69:190-200	Lake Tanganyika, Mpulungu, Zambia
Cichliformes	Perciformes	Cichlidae	Benthochromis	tricoti		Benthochromis_tricoti	1	f	Mass	20.94	0.128			Adult		Gonzalez-Voyer A et al. (2009) Proc. R. Soc. B 276: 161-167	Wild caught specimen purchased through acquarium trading
Cichliformes	Perciformes	Cichlidae	Benthochromis	tricoti		Benthochromis_tricoti	1	f	Mass	15.9	0.105			Adult		Gonzalez-Voyer A et al. (2009) Proc. R. Soc. B 276: 161-167	Wild caught specimen purchased through acquarium trading
Cichliformes	Perciformes	Cichlidae	Benthochromis	tricoti		Benthochromis_tricoti	1	m	Mass	48.9	0.1846			Adult		Tsuboi M et al. (2015) Evolution 69:190-200	Lake Tanganyika, Mpulungu, Zambia
Cichliformes	Perciformes	Cichlidae	Benthochromis	tricoti		Benthochromis_tricoti	1	m	Mass	40	0.1627			Adult		Tsuboi M et al. (2015) Evolution 69:190-200	Lake Tanganyika, Mpulungu, Zambia
Cichliformes	Perciformes	Cichlidae	Benthochromis	tricoti		Benthochromis_tricoti	1	m	Mass	39.8	0.1636			Adult		Tsuboi M et al. (2015) Evolution 69:190-200	Lake Tanganyika, Mpulungu, Zambia
Cichliformes	Perciformes	Cichlidae	Benthochromis	tricoti		Benthochromis_tricoti	1	m	Mass	37.5	0.162			Adult		Tsuboi M et al. (2015) Evolution 69:190-200	Lake Tanganyika, Mpulungu, Zambia
Cichliformes	Perciformes	Cichlidae	Benthochromis	tricoti		Benthochromis_tricoti	1	m	Mass	40.2	0.1463			Adult		Tsuboi M et al. (2015) Evolution 69:190-200	Lake Tanganyika, Mpulungu, Zambia
Cichliformes	Perciformes	Cichlidae	Benthochromis	tricoti		Benthochromis_tricoti	1	m	Mass	34.3	0.1597			Adult		Tsuboi M et al. (2015) Evolution 69:190-200	Lake Tanganyika, Mpulungu, Zambia
Cichliformes	Perciformes	Cichlidae	Benthochromis	tricoti		Benthochromis_tricoti	1	m	Mass	35	0.1442			Adult		Tsuboi M et al. (2015) Evolution 69:190-200	Lake Tanganyika, Mpulungu, Zambia
Cichliformes	Perciformes	Cichlidae	Benthochromis	tricoti		Benthochromis_tricoti	1	m	Mass	40.6	0.1736			Adult		Tsuboi M et al. (2015) Evolution 69:190-200	Lake Tanganyika, Mpulungu, Zambia
Cichliformes	Perciformes	Cichlidae	Benthochromis	tricoti		Benthochromis_tricoti	1	m	Mass	35.2	0.1593			Adult		Tsuboi M et al. (2015) Evolution 69:190-200	Lake Tanganyika, Mpulungu, Zambia
Cichliformes	Perciformes	Cichlidae	Benthochromis	tricoti		Benthochromis_tricoti	1	m	Mass	42.2	0.1785			Adult		Tsuboi M et al. (2015) Evolution 69:190-200	Lake Tanganyika, Mpulungu, Zambia
Cichliformes	Perciformes	Cichlidae	Benthochromis	tricoti		Benthochromis_tricoti	1	m	Mass	35.3	0.1592			Adult		Tsuboi M et al. (2015) Evolution 69:190-200	Lake Tanganyika, Mpulungu, Zambia
Cichliformes	Perciformes	Cichlidae	Benthochromis	tricoti		Benthochromis_tricoti	1	m	Mass	38.9	0.1569			Adult		Tsuboi M et al. (2015) Evolution 69:190-200	Lake Tanganyika, Mpulungu, Zambia
Cichliformes	Perciformes	Cichlidae	Callochromis	melanostigma		Callochromis_melanostigma	1	f	Mass	2.58	0.045			Adult		Gonzalez-Voyer A et al. (2009) Proc. R. Soc. B 276: 161-167	Wild caught specimen purchased through acquarium trading
Cichliformes	Perciformes	Cichlidae	Callochromis	melanostigma		Callochromis_melanostigma	1	m	Mass	2.23	0.041			Adult		Gonzalez-Voyer A et al. (2009) Proc. R. Soc. B 276: 161-167	Wild caught specimen purchased through acquarium trading
Cichliformes	Perciformes	Cichlidae	Callochromis	melanostigma		Callochromis_melanostigma	1	m	Mass	2.33	0.041			Adult		Gonzalez-Voyer A et al. (2009) Proc. R. Soc. B 276: 161-167	Wild caught specimen purchased through acquarium trading
Cichliformes	Perciformes	Cichlidae	Callochromis	pleurospilus		Callochromis_pleurospilus	1	m	Mass	5.73	0.062			Adult		Gonzalez-Voyer A et al. (2009) Proc. R. Soc. B 276: 161-167	Wild caught specimen purchased through acquarium trading
Cichliformes	Perciformes	Cichlidae	Callochromis	pleurospilus		Callochromis_pleurospilus	1	m	Mass	6.28	0.071			Adult		Gonzalez-Voyer A et al. (2009) Proc. R. Soc. B 276: 161-167	Wild caught specimen purchased through acquarium trading
Cichliformes	Perciformes	Cichlidae	Callochromis	pleurospilus		Callochromis_pleurospilus	1	m	Mass	6.75	0.062			Adult		Gonzalez-Voyer A et al. (2009) Proc. R. Soc. B 276: 161-167	Wild caught specimen purchased through acquarium trading
Cichliformes	Perciformes	Cichlidae	Callochromis	pleurospilus		Callochromis_pleurospilus	1	m	Mass	4.47	0.056			Adult		Gonzalez-Voyer A et al. (2009) Proc. R. Soc. B 276: 161-167	Wild caught specimen purchased through acquarium trading
Cichliformes	Perciformes	Cichlidae	Chalinochromis	brichardi		Chalinochromis_brichardi	1	f	Mass	9.1	0.0453			Adult		Tsuboi M et al. (2015) Evolution 69:190-200	Lake Tanganyika, Mpulungu, Zambia
Cichliformes	Perciformes	Cichlidae	Chalinochromis	brichardi		Chalinochromis_brichardi	1	f	Mass	10.6	0.0569			Adult		Tsuboi M et al. (2015) Evolution 69:190-200	Lake Tanganyika, Mpulungu, Zambia
Cichliformes	Perciformes	Cichlidae	Chalinochromis	brichardi		Chalinochromis_brichardi	1	m	Mass	14.2	0.0583			Adult		Tsuboi M et al. (2015) Evolution 69:190-200	Lake Tanganyika, Mpulungu, Zambia
Cichliformes	Perciformes	Cichlidae	Chalinochromis	brichardi		Chalinochromis_brichardi	1	m	Mass	17.7	0.0635			Adult		Tsuboi M et al. (2015) Evolution 69:190-200	Lake Tanganyika, Mpulungu, Zambia
Cichliformes	Perciformes	Cichlidae	Chalinochromis	brichardi		Chalinochromis_brichardi	1	m	Mass	15.2	0.0598			Adult		Tsuboi M et al. (2015) Evolution 69:190-200	Lake Tanganyika, Mpulungu, Zambia
Cichliformes	Perciformes	Cichlidae	Chalinochromis	brichardi		Chalinochromis_brichardi	1	m	Mass	14.1	0.0545			Adult		Tsuboi M et al. (2015) Evolution 69:190-200	Lake Tanganyika, Mpulungu, Zambia
Cichliformes	Perciformes	Cichlidae	Chalinochromis	brichardi		Chalinochromis_brichardi	1	m	Mass	7.8	0.0472			Adult		Tsuboi M et al. (2015) Evolution 69:190-200	Lake Tanganyika, Mpulungu, Zambia
Cichliformes	Perciformes	Cichlidae	Chalinochromis	brichardi		Chalinochromis_brichardi	1	m	Mass	6.1	0.0394			Adult		Tsuboi M et al. (2015) Evolution 69:190-200	Lake Tanganyika, Mpulungu, Zambia
Cichliformes	Perciformes	Cichlidae	Chalinochromis	brichardi		Chalinochromis_brichardi	1	m	Mass	12.3	0.0559			Adult		Tsuboi M et al. (2015) Evolution 69:190-200	Lake Tanganyika, Mpulungu, Zambia
Cichliformes	Perciformes	Cichlidae	Chalinochromis	brichardi		Chalinochromis_brichardi	1	m	Mass	10.8	0.0501			Adult		Tsuboi M et al. (2015) Evolution 69:190-200	Lake Tanganyika, Mpulungu, Zambia
Cichliformes	Perciformes	Cichlidae	Chalinochromis	brichardi		Chalinochromis_brichardi	1	m	Mass	6.2	0.0455			Adult		Tsuboi M et al. (2015) Evolution 69:190-200	Lake Tanganyika, Mpulungu, Zambia
Cichliformes	Perciformes	Cichlidae	Chalinochromis	brichardi		Chalinochromis_brichardi	1	m	Mass	5.5	0.0426			Adult		Tsuboi M et al. (2015) Evolution 69:190-200	Lake Tanganyika, Mpulungu, Zambia
Cichliformes	Perciformes	Cichlidae	Ctenochromis	horei		Ctenochromis_horei	1	f	Mass	11.25	0.111			Adult		Gonzalez-Voyer A et al. (2009) Proc. R. Soc. B 276: 161-167	Wild caught specimen purchased through acquarium trading
Cichliformes	Perciformes	Cichlidae	Ctenochromis	horei		Ctenochromis_horei	1	f	Mass	7.9	0.1031			Adult		Tsuboi M et al. (2015) Evolution 69:190-200	Lake Tanganyika, Mpulungu, Zambia
Cichliformes	Perciformes	Cichlidae	Ctenochromis	horei		Ctenochromis_horei	1	f	Mass	8.6	0.1032			Adult		Tsuboi M et al. (2015) Evolution 69:190-200	Lake Tanganyika, Mpulungu, Zambia
Cichliformes	Perciformes	Cichlidae	Ctenochromis	horei		Ctenochromis_horei	1	f	Mass	14	0.1438			Adult		Tsuboi M et al. (2015) Evolution 69:190-200	Lake Tanganyika, Mpulungu, Zambia
Cichliformes	Perciformes	Cichlidae	Ctenochromis	horei		Ctenochromis_horei	1	f	Mass	6.5	0.0948			Adult		Tsuboi M et al. (2015) Evolution 69:190-200	Lake Tanganyika, Mpulungu, Zambia
Cichliformes	Perciformes	Cichlidae	Ctenochromis	horei		Ctenochromis_horei	1	f	Mass	5.5	0.0915			Adult		Tsuboi M et al. (2015) Evolution 69:190-200	Lake Tanganyika, Mpulungu, Zambia
Cichliformes	Perciformes	Cichlidae	Ctenochromis	horei		Ctenochromis_horei	1	f	Mass	7.8	0.097			Adult		Tsuboi M et al. (2015) Evolution 69:190-200	Lake Tanganyika, Mpulungu, Zambia
Cichliformes	Perciformes	Cichlidae	Ctenochromis	horei		Ctenochromis_horei	1	f	Mass	14.6	0.1463			Adult		Tsuboi M et al. (2015) Evolution 69:190-200	Lake Tanganyika, Mpulungu, Zambia
Cichliformes	Perciformes	Cichlidae	Ctenochromis	horei		Ctenochromis_horei	1	m	Mass	33.13	0.19			Adult		Gonzalez-Voyer A et al. (2009) Proc. R. Soc. B 276: 161-167	Wild caught specimen purchased through acquarium trading
Cichliformes	Perciformes	Cichlidae	Ctenochromis	horei		Ctenochromis_horei	1	m	Mass	34.41	0.185			Adult		Gonzalez-Voyer A et al. (2009) Proc. R. Soc. B 276: 161-167	Wild caught specimen purchased through acquarium trading
Cichliformes	Perciformes	Cichlidae	Ctenochromis	horei		Ctenochromis_horei	1	m	Mass	16.7	0.1657			Adult		Tsuboi M et al. (2015) Evolution 69:190-200	Lake Tanganyika, Mpulungu, Zambia
Cichliformes	Perciformes	Cichlidae	Ctenochromis	horei		Ctenochromis_horei	1	m	Mass	22.4	0.1365			Adult		Tsuboi M et al. (2015) Evolution 69:190-200	Lake Tanganyika, Mpulungu, Zambia
Cichliformes	Perciformes	Cichlidae	Ctenochromis	horei		Ctenochromis_horei	1	m	Mass	25.8	0.1792			Adult		Tsuboi M et al. (2015) Evolution 69:190-200	Lake Tanganyika, Mpulungu, Zambia
Cichliformes	Perciformes	Cichlidae	Ctenochromis	horei		Ctenochromis_horei	1	m	Mass	29.3	0.2064			Adult		Tsuboi M et al. (2015) Evolution 69:190-200	Lake Tanganyika, Mpulungu, Zambia
Cichliformes	Perciformes	Cichlidae	Ctenochromis	horei		Ctenochromis_horei	1	m	Mass	13.4	0.1341			Adult		Tsuboi M et al. (2015) Evolution 69:190-200	Lake Tanganyika, Mpulungu, Zambia
Cichliformes	Perciformes	Cichlidae	Ctenochromis	horei		Ctenochromis_horei	1	m	Mass	9.4	0.1079			Adult		Tsuboi M et al. (2015) Evolution 69:190-200	Lake Tanganyika, Mpulungu, Zambia
Cichliformes	Perciformes	Cichlidae	Ctenochromis	horei		Ctenochromis_horei	1	m	Mass	18.2	0.1433			Adult		Tsuboi M et al. (2015) Evolution 69:190-200	Lake Tanganyika, Mpulungu, Zambia
Cichliformes	Perciformes	Cichlidae	Cyathopharynx	furcifer		Cyathopharynx_furcifer	1	f	Mass	29.55	0.128			Adult		Gonzalez-Voyer A et al. (2009) Proc. R. Soc. B 276: 161-167	Wild caught specimen purchased through acquarium trading
Cichliformes	Perciformes	Cichlidae	Cyathopharynx	furcifer		Cyathopharynx_furcifer	1	f	Mass	31.95	0.15			Adult		Gonzalez-Voyer A et al. (2009) Proc. R. Soc. B 276: 161-167	Wild caught specimen purchased through acquarium trading
Cichliformes	Perciformes	Cichlidae	Cyathopharynx	furcifer		Cyathopharynx_furcifer	1	f	Mass	12.4	0.1167			Adult		Tsuboi M et al. (2015) Evolution 69:190-200	Lake Tanganyika, Mpulungu, Zambia
Cichliformes	Perciformes	Cichlidae	Cyathopharynx	furcifer		Cyathopharynx_furcifer	1	m	Mass	20.91	0.114			Adult		Gonzalez-Voyer A et al. (2009) Proc. R. Soc. B 276: 161-167	Wild caught specimen purchased through acquarium trading
Cichliformes	Perciformes	Cichlidae	Cyathopharynx	furcifer		Cyathopharynx_furcifer	1	m	Mass	53.61	0.164			Adult		Gonzalez-Voyer A et al. (2009) Proc. R. Soc. B 276: 161-167	Wild caught specimen purchased through acquarium trading
Cichliformes	Perciformes	Cichlidae	Cyathopharynx	furcifer		Cyathopharynx_furcifer	1	m	Mass	50.5	0.1679			Adult		Tsuboi M et al. (2015) Evolution 69:190-200	Lake Tanganyika, Mpulungu, Zambia
Cichliformes	Perciformes	Cichlidae	Cyathopharynx	furcifer		Cyathopharynx_furcifer	1	m	Mass	47.2	0.154			Adult		Tsuboi M et al. (2015) Evolution 69:190-200	Lake Tanganyika, Mpulungu, Zambia
Cichliformes	Perciformes	Cichlidae	Cyathopharynx	furcifer		Cyathopharynx_furcifer	1	m	Mass	49.7	0.191			Adult		Tsuboi M et al. (2015) Evolution 69:190-200	Lake Tanganyika, Mpulungu, Zambia
Cichliformes	Perciformes	Cichlidae	Cyathopharynx	furcifer		Cyathopharynx_furcifer	1	m	Mass	32.5	0.1474			Adult		Tsuboi M et al. (2015) Evolution 69:190-200	Lake Tanganyika, Mpulungu, Zambia
Cichliformes	Perciformes	Cichlidae	Cyathopharynx	furcifer		Cyathopharynx_furcifer	1	m	Mass	34.4	0.14			Adult		Tsuboi M et al. (2015) Evolution 69:190-200	Lake Tanganyika, Mpulungu, Zambia
Cichliformes	Perciformes	Cichlidae	Cyathopharynx	furcifer		Cyathopharynx_furcifer	1	m	Mass	37.2	0.1823			Adult		Tsuboi M et al. (2015) Evolution 69:190-200	Lake Tanganyika, Mpulungu, Zambia
Cichliformes	Perciformes	Cichlidae	Cyathopharynx	furcifer		Cyathopharynx_furcifer	1	m	Mass	13.7	0.1187			Adult		Tsuboi M et al. (2015) Evolution 69:190-200	Lake Tanganyika, Mpulungu, Zambia
Cichliformes	Perciformes	Cichlidae	Cyathopharynx	furcifer		Cyathopharynx_furcifer	1	m	Mass	31.8	0.1529			Adult		Tsuboi M et al. (2015) Evolution 69:190-200	Lake Tanganyika, Mpulungu, Zambia
Cichliformes	Perciformes	Cichlidae	Cyathopharynx	furcifer		Cyathopharynx_furcifer	1	m	Mass	20.5	0.135			Adult		Tsuboi M et al. (2015) Evolution 69:190-200	Lake Tanganyika, Mpulungu, Zambia
Cichliformes	Perciformes	Cichlidae	Cyathopharynx	furcifer		Cyathopharynx_furcifer	1	m	Mass	13.5	0.1109			Adult		Tsuboi M et al. (2015) Evolution 69:190-200	Lake Tanganyika, Mpulungu, Zambia
Cichliformes	Perciformes	Cichlidae	Cyphotilapia	frontosa		Cyphotilapia_frontosa	1	f	Mass	75.51	0.24			Adult		Gonzalez-Voyer A et al. (2009) Proc. R. Soc. B 276: 161-167	Wild caught specimen purchased through acquarium trading
Cichliformes	Perciformes	Cichlidae	Cyphotilapia	frontosa		Cyphotilapia_frontosa	1	f	Mass	50.04	0.15			Adult		Gonzalez-Voyer A et al. (2009) Proc. R. Soc. B 276: 161-167	Wild caught specimen purchased through acquarium trading
Cichliformes	Perciformes	Cichlidae	Cyphotilapia	frontosa		Cyphotilapia_frontosa	1	f	Mass	74.38	0.203			Adult		Gonzalez-Voyer A et al. (2009) Proc. R. Soc. B 276: 161-167	Wild caught specimen purchased through acquarium trading
Cichliformes	Perciformes	Cichlidae	Cyphotilapia	frontosa		Cyphotilapia_frontosa	1	m	Mass	64.72	0.188			Adult		Gonzalez-Voyer A et al. (2009) Proc. R. Soc. B 276: 161-167	Wild caught specimen purchased through acquarium trading
Cichliformes	Perciformes	Cichlidae	Cyphotilapia	frontosa		Cyphotilapia_frontosa	1	m	Mass	135.46	0.245			Adult		Gonzalez-Voyer A et al. (2009) Proc. R. Soc. B 276: 161-167	Wild caught specimen purchased through acquarium trading
Cichliformes	Perciformes	Cichlidae	Cyprichromis	leptosoma		Cyprichromis_leptosoma	1	f	Mass	7.73	0.07			Adult		Gonzalez-Voyer A et al. (2009) Proc. R. Soc. B 276: 161-167	Wild caught specimen purchased through acquarium trading
Cichliformes	Perciformes	Cichlidae	Cyprichromis	leptosoma		Cyprichromis_leptosoma	1	f	Mass	5.83	0.066			Adult		Gonzalez-Voyer A et al. (2009) Proc. R. Soc. B 276: 161-167	Wild caught specimen purchased through acquarium trading
Cichliformes	Perciformes	Cichlidae	Cyprichromis	leptosoma		Cyprichromis_leptosoma	1	m	Mass	11.78	0.074			Adult		Gonzalez-Voyer A et al. (2009) Proc. R. Soc. B 276: 161-167	Wild caught specimen purchased through acquarium trading
Cichliformes	Perciformes	Cichlidae	Cyprichromis	leptosoma		Cyprichromis_leptosoma	1	m	Mass	9.05	0.092			Adult		Gonzalez-Voyer A et al. (2009) Proc. R. Soc. B 276: 161-167	Wild caught specimen purchased through acquarium trading
Cichliformes	Perciformes	Cichlidae	Cyprichromis	leptosoma		Cyprichromis_leptosoma	1	m	Mass	7.78	0.091			Adult		Gonzalez-Voyer A et al. (2009) Proc. R. Soc. B 276: 161-167	Wild caught specimen purchased through acquarium trading
Cichliformes	Perciformes	Cichlidae	Cyprichromis	leptosoma		Cyprichromis_leptosoma	1	m	Mass	6.85	0.07			Adult		Gonzalez-Voyer A et al. (2009) Proc. R. Soc. B 276: 161-167	Wild caught specimen purchased through acquarium trading
Cichliformes	Perciformes	Cichlidae	Cyprichromis	leptosoma		Cyprichromis_leptosoma	1	m	Mass	19.8	0.1013			Adult		Tsuboi M et al. (2015) Evolution 69:190-200	Lake Tanganyika, Mpulungu, Zambia
Cichliformes	Perciformes	Cichlidae	Cyprichromis	leptosoma		Cyprichromis_leptosoma	1	m	Mass	16.2	0.1078			Adult		Tsuboi M et al. (2015) Evolution 69:190-200	Lake Tanganyika, Mpulungu, Zambia
Cichliformes	Perciformes	Cichlidae	Cyprichromis	leptosoma		Cyprichromis_leptosoma	1	m	Mass	19.8	0.1012			Adult		Tsuboi M et al. (2015) Evolution 69:190-200	Lake Tanganyika, Mpulungu, Zambia
Cichliformes	Perciformes	Cichlidae	Cyprichromis	leptosoma		Cyprichromis_leptosoma	1	m	Mass	17.5	0.1042			Adult		Tsuboi M et al. (2015) Evolution 69:190-200	Lake Tanganyika, Mpulungu, Zambia
Cichliformes	Perciformes	Cichlidae	Cyprichromis	leptosoma		Cyprichromis_leptosoma	1	m	Mass	9.9	0.0739			Adult		Tsuboi M et al. (2015) Evolution 69:190-200	Lake Tanganyika, Mpulungu, Zambia
Cichliformes	Perciformes	Cichlidae	Cyprichromis	leptosoma		Cyprichromis_leptosoma	1	m	Mass	19.1	0.1114			Adult		Tsuboi M et al. (2015) Evolution 69:190-200	Lake Tanganyika, Mpulungu, Zambia
Cichliformes	Perciformes	Cichlidae	Cyprichromis	leptosoma		Cyprichromis_leptosoma	1	m	Mass	21	0.1003			Adult		Tsuboi M et al. (2015) Evolution 69:190-200	Lake Tanganyika, Mpulungu, Zambia
Cichliformes	Perciformes	Cichlidae	Cyprichromis	leptosoma		Cyprichromis_leptosoma	1	m	Mass	17.6	0.099			Adult		Tsuboi M et al. (2015) Evolution 69:190-200	Lake Tanganyika, Mpulungu, Zambia
Cichliformes	Perciformes	Cichlidae	Cyprichromis	leptosoma		Cyprichromis_leptosoma	1	m	Mass	12.6	0.0782			Adult		Tsuboi M et al. (2015) Evolution 69:190-200	Lake Tanganyika, Mpulungu, Zambia
Cichliformes	Perciformes	Cichlidae	Cyprichromis	leptosoma		Cyprichromis_leptosoma	1	m	Mass	11.2	0.0781			Adult		Tsuboi M et al. (2015) Evolution 69:190-200	Lake Tanganyika, Mpulungu, Zambia
Cichliformes	Perciformes	Cichlidae	Cyprichromis	leptosoma		Cyprichromis_leptosoma	1	m	Mass	20.5	0.1231			Adult		Tsuboi M et al. (2015) Evolution 69:190-200	Lake Tanganyika, Mpulungu, Zambia
Cichliformes	Perciformes	Cichlidae	Cyprichromis	leptosoma		Cyprichromis_leptosoma	1	m	Mass	19.5	0.1044			Adult		Tsuboi M et al. (2015) Evolution 69:190-200	Lake Tanganyika, Mpulungu, Zambia
Cichliformes	Perciformes	Cichlidae	Cyprichromis	microlepidotus		Cyprichromis_microlepidotus	1	m	Mass	13.53	0.111			Adult		Gonzalez-Voyer A et al. (2009) Proc. R. Soc. B 276: 161-167	Wild caught specimen purchased through acquarium trading
Cichliformes	Perciformes	Cichlidae	Cyprichromis	microlepidotus		Cyprichromis_microlepidotus	1	m	Mass	20.9	0.128			Adult		Gonzalez-Voyer A et al. (2009) Proc. R. Soc. B 276: 161-167	Wild caught specimen purchased through acquarium trading
Cichliformes	Perciformes	Cichlidae	Cyprichromis	microlepidotus		Cyprichromis_microlepidotus	1	m	Mass	23.21	0.127			Adult		Gonzalez-Voyer A et al. (2009) Proc. R. Soc. B 276: 161-167	Wild caught specimen purchased through acquarium trading
Cichliformes	Perciformes	Cichlidae	Cyprichromis	microlepidotus		Cyprichromis_microlepidotus	1	m	Mass	19.26	0.123			Adult		Gonzalez-Voyer A et al. (2009) Proc. R. Soc. B 276: 161-167	Wild caught specimen purchased through acquarium trading
Cichliformes	Perciformes	Cichlidae	Cyprichromis	microlepidotus		Cyprichromis_microlepidotus	1	m	Mass	12.55	0.098			Adult		Gonzalez-Voyer A et al. (2009) Proc. R. Soc. B 276: 161-167	Wild caught specimen purchased through acquarium trading
Cichliformes	Perciformes	Cichlidae	Ectodus	descampsii		Ectodus_descampsii	1	f	Mass	8.7	0.0614			Adult		Tsuboi M et al. (2015) Evolution 69:190-200	Lake Tanganyika, Mpulungu, Zambia
Cichliformes	Perciformes	Cichlidae	Ectodus	descampsii		Ectodus_descampsii	1	f	Mass	9.8	0.0648			Adult		Tsuboi M et al. (2015) Evolution 69:190-200	Lake Tanganyika, Mpulungu, Zambia
Cichliformes	Perciformes	Cichlidae	Ectodus	descampsii		Ectodus_descampsii	1	f	Mass	5.5	0.0483			Adult		Tsuboi M et al. (2015) Evolution 69:190-200	Lake Tanganyika, Mpulungu, Zambia
Cichliformes	Perciformes	Cichlidae	Ectodus	descampsii		Ectodus_descampsii	1	f	Mass	6.5	0.0528			Adult		Tsuboi M et al. (2015) Evolution 69:190-200	Lake Tanganyika, Mpulungu, Zambia
Cichliformes	Perciformes	Cichlidae	Ectodus	descampsii		Ectodus_descampsii	1	f	Mass	8.7	0.0618			Adult		Tsuboi M et al. (2015) Evolution 69:190-200	Lake Tanganyika, Mpulungu, Zambia
Cichliformes	Perciformes	Cichlidae	Ectodus	descampsii		Ectodus_descampsii	1	m	Mass	7.7	0.0583			Adult		Tsuboi M et al. (2015) Evolution 69:190-200	Lake Tanganyika, Mpulungu, Zambia
Cichliformes	Perciformes	Cichlidae	Ectodus	descampsii		Ectodus_descampsii	1	m	Mass	9	0.0616			Adult		Tsuboi M et al. (2015) Evolution 69:190-200	Lake Tanganyika, Mpulungu, Zambia
Cichliformes	Perciformes	Cichlidae	Ectodus	descampsii		Ectodus_descampsii	1	m	Mass	10.4	0.063			Adult		Tsuboi M et al. (2015) Evolution 69:190-200	Lake Tanganyika, Mpulungu, Zambia
Cichliformes	Perciformes	Cichlidae	Ectodus	descampsii		Ectodus_descampsii	1	m	Mass	10	0.0574			Adult		Tsuboi M et al. (2015) Evolution 69:190-200	Lake Tanganyika, Mpulungu, Zambia
Cichliformes	Perciformes	Cichlidae	Ectodus	descampsii		Ectodus_descampsii	1	m	Mass	8.8	0.0792			Adult		Tsuboi M et al. (2015) Evolution 69:190-200	Lake Tanganyika, Mpulungu, Zambia
Cichliformes	Perciformes	Cichlidae	Ectodus	descampsii		Ectodus_descampsii	1	m	Mass	8	0.0593			Adult		Tsuboi M et al. (2015) Evolution 69:190-200	Lake Tanganyika, Mpulungu, Zambia
Cichliformes	Perciformes	Cichlidae	Ectodus	descampsii		Ectodus_descampsii	1	m	Mass	8.9	0.0657			Adult		Tsuboi M et al. (2015) Evolution 69:190-200	Lake Tanganyika, Mpulungu, Zambia
Cichliformes	Perciformes	Cichlidae	Ectodus	descampsii		Ectodus_descampsii	1	m	Mass	9.8	0.0676			Adult		Tsuboi M et al. (2015) Evolution 69:190-200	Lake Tanganyika, Mpulungu, Zambia
Cichliformes	Perciformes	Cichlidae	Ectodus	descampsii		Ectodus_descampsii	1	m	Mass	9.8	0.0663			Adult		Tsuboi M et al. (2015) Evolution 69:190-200	Lake Tanganyika, Mpulungu, Zambia
Cichliformes	Perciformes	Cichlidae	Eretmodus	cyanostictus		Eretmodus_cyanostictus	1	f	Mass	1.89	0.032			Adult		Gonzalez-Voyer A et al. (2009) Proc. R. Soc. B 276: 161-167	Wild caught specimen purchased through acquarium trading
Cichliformes	Perciformes	Cichlidae	Eretmodus	cyanostictus		Eretmodus_cyanostictus	1	f	Mass	7.8	0.0605			Adult		Tsuboi M et al. (2015) Evolution 69:190-200	Lake Tanganyika, Mpulungu, Zambia
Cichliformes	Perciformes	Cichlidae	Eretmodus	cyanostictus		Eretmodus_cyanostictus	1	f	Mass	5.4	0.0487			Adult		Tsuboi M et al. (2015) Evolution 69:190-200	Lake Tanganyika, Mpulungu, Zambia
Cichliformes	Perciformes	Cichlidae	Eretmodus	cyanostictus		Eretmodus_cyanostictus	1	f	Mass	6	0.0562			Adult		Tsuboi M et al. (2015) Evolution 69:190-200	Lake Tanganyika, Mpulungu, Zambia
Cichliformes	Perciformes	Cichlidae	Eretmodus	cyanostictus		Eretmodus_cyanostictus	1	f	Mass	6.4	0.0578			Adult		Tsuboi M et al. (2015) Evolution 69:190-200	Lake Tanganyika, Mpulungu, Zambia
Cichliformes	Perciformes	Cichlidae	Eretmodus	cyanostictus		Eretmodus_cyanostictus	1	f	Mass	7.1	0.0545			Adult		Tsuboi M et al. (2015) Evolution 69:190-200	Lake Tanganyika, Mpulungu, Zambia
Cichliformes	Perciformes	Cichlidae	Eretmodus	cyanostictus		Eretmodus_cyanostictus	1	f	Mass	5.7	0.0554			Adult		Tsuboi M et al. (2015) Evolution 69:190-200	Lake Tanganyika, Mpulungu, Zambia
Cichliformes	Perciformes	Cichlidae	Eretmodus	cyanostictus		Eretmodus_cyanostictus	1	m	Mass	5.17	0.048			Adult		Gonzalez-Voyer A et al. (2009) Proc. R. Soc. B 276: 161-167	Wild caught specimen purchased through acquarium trading
Cichliformes	Perciformes	Cichlidae	Eretmodus	cyanostictus		Eretmodus_cyanostictus	1	m	Mass	3.43	0.04			Adult		Gonzalez-Voyer A et al. (2009) Proc. R. Soc. B 276: 161-167	Wild caught specimen purchased through acquarium trading
Cichliformes	Perciformes	Cichlidae	Eretmodus	cyanostictus		Eretmodus_cyanostictus	1	m	Mass	2.16	0.033			Adult		Gonzalez-Voyer A et al. (2009) Proc. R. Soc. B 276: 161-167	Wild caught specimen purchased through acquarium trading
Cichliformes	Perciformes	Cichlidae	Eretmodus	cyanostictus		Eretmodus_cyanostictus	1	m	Mass	8	0.0653			Adult		Tsuboi M et al. (2015) Evolution 69:190-200	Lake Tanganyika, Mpulungu, Zambia
Cichliformes	Perciformes	Cichlidae	Eretmodus	cyanostictus		Eretmodus_cyanostictus	1	m	Mass	10.7	0.0684			Adult		Tsuboi M et al. (2015) Evolution 69:190-200	Lake Tanganyika, Mpulungu, Zambia
Cichliformes	Perciformes	Cichlidae	Eretmodus	cyanostictus		Eretmodus_cyanostictus	1	m	Mass	10	0.0651			Adult		Tsuboi M et al. (2015) Evolution 69:190-200	Lake Tanganyika, Mpulungu, Zambia
Cichliformes	Perciformes	Cichlidae	Eretmodus	cyanostictus		Eretmodus_cyanostictus	1	m	Mass	8.3	0.0567			Adult		Tsuboi M et al. (2015) Evolution 69:190-200	Lake Tanganyika, Mpulungu, Zambia
Cichliformes	Perciformes	Cichlidae	Eretmodus	cyanostictus		Eretmodus_cyanostictus	1	m	Mass	8.2	0.057			Adult		Tsuboi M et al. (2015) Evolution 69:190-200	Lake Tanganyika, Mpulungu, Zambia
Cichliformes	Perciformes	Cichlidae	Eretmodus	cyanostictus		Eretmodus_cyanostictus	1	m	Mass	8.2	0.061			Adult		Tsuboi M et al. (2015) Evolution 69:190-200	Lake Tanganyika, Mpulungu, Zambia
Cichliformes	Perciformes	Cichlidae	Etroplus	suratensis		Etroplus_suratensis	1	unknown	Mass	130	0.227			unknown		Bauchot R, Diagne M, Platel R, Ridet J-M, Bauchot M-L. in Fishbase. www.fishbase.org. date of access: Apr.-13-17
Cichliformes	Perciformes	Cichlidae	Gnathochromis	permaxillaris		Gnathochromis_permaxillaris	1	f	Mass	26.98	0.098			Adult		Gonzalez-Voyer A et al. (2009) Proc. R. Soc. B 276: 161-167	Wild caught specimen purchased through acquarium trading
Cichliformes	Perciformes	Cichlidae	Gnathochromis	permaxillaris		Gnathochromis_permaxillaris	1	f	Mass	25.48	0.105			Adult		Gonzalez-Voyer A et al. (2009) Proc. R. Soc. B 276: 161-167	Wild caught specimen purchased through acquarium trading
Cichliformes	Perciformes	Cichlidae	Gnathochromis	permaxillaris		Gnathochromis_permaxillaris	1	f	Mass	32.2	0.1162			Adult		Tsuboi M et al. (2015) Evolution 69:190-200	Lake Tanganyika, Mpulungu, Zambia
Cichliformes	Perciformes	Cichlidae	Gnathochromis	permaxillaris		Gnathochromis_permaxillaris	1	f	Mass	28.3	0.0778			Adult		Tsuboi M et al. (2015) Evolution 69:190-200	Lake Tanganyika, Mpulungu, Zambia
Cichliformes	Perciformes	Cichlidae	Gnathochromis	permaxillaris		Gnathochromis_permaxillaris	1	m	Mass	17.68	0.074			Adult		Gonzalez-Voyer A et al. (2009) Proc. R. Soc. B 276: 161-167	Wild caught specimen purchased through acquarium trading
Cichliformes	Perciformes	Cichlidae	Gnathochromis	permaxillaris		Gnathochromis_permaxillaris	1	m	Mass	10.36	0.064			Adult		Gonzalez-Voyer A et al. (2009) Proc. R. Soc. B 276: 161-167	Wild caught specimen purchased through acquarium trading
Cichliformes	Perciformes	Cichlidae	Gnathochromis	permaxillaris		Gnathochromis_permaxillaris	1	m	Mass	34.2	0.1105			Adult		Tsuboi M et al. (2015) Evolution 69:190-200	Lake Tanganyika, Mpulungu, Zambia
Cichliformes	Perciformes	Cichlidae	Gnathochromis	permaxillaris		Gnathochromis_permaxillaris	1	m	Mass	12.8	0.0588			Adult		Tsuboi M et al. (2015) Evolution 69:190-200	Lake Tanganyika, Mpulungu, Zambia
Cichliformes	Perciformes	Cichlidae	Gnathochromis	pfefferi		Gnathochromis_pfefferi	1	f	Mass	10.3	0.1135			Adult		Tsuboi M et al. (2015) Evolution 69:190-200	Lake Tanganyika, Mpulungu, Zambia
Cichliformes	Perciformes	Cichlidae	Gnathochromis	pfefferi		Gnathochromis_pfefferi	1	f	Mass	9.3	0.0907			Adult		Tsuboi M et al. (2015) Evolution 69:190-200	Lake Tanganyika, Mpulungu, Zambia
Cichliformes	Perciformes	Cichlidae	Gnathochromis	pfefferi		Gnathochromis_pfefferi	1	f	Mass	8.5	0.0917			Adult		Tsuboi M et al. (2015) Evolution 69:190-200	Lake Tanganyika, Mpulungu, Zambia
Cichliformes	Perciformes	Cichlidae	Gnathochromis	pfefferi		Gnathochromis_pfefferi	1	f	Mass	7.8	0.0836			Adult		Tsuboi M et al. (2015) Evolution 69:190-200	Lake Tanganyika, Mpulungu, Zambia
Cichliformes	Perciformes	Cichlidae	Gnathochromis	pfefferi		Gnathochromis_pfefferi	1	f	Mass	6	0.0711			Adult		Tsuboi M et al. (2015) Evolution 69:190-200	Lake Tanganyika, Mpulungu, Zambia
Cichliformes	Perciformes	Cichlidae	Gnathochromis	pfefferi		Gnathochromis_pfefferi	1	f	Mass	7.7	0.0843			Adult		Tsuboi M et al. (2015) Evolution 69:190-200	Lake Tanganyika, Mpulungu, Zambia
Cichliformes	Perciformes	Cichlidae	Gnathochromis	pfefferi		Gnathochromis_pfefferi	1	f	Mass	9.3	0.0901			Adult		Tsuboi M et al. (2015) Evolution 69:190-200	Lake Tanganyika, Mpulungu, Zambia
Cichliformes	Perciformes	Cichlidae	Gnathochromis	pfefferi		Gnathochromis_pfefferi	1	f	Mass	5.6	0.0698			Adult		Tsuboi M et al. (2015) Evolution 69:190-200	Lake Tanganyika, Mpulungu, Zambia
Cichliformes	Perciformes	Cichlidae	Gnathochromis	pfefferi		Gnathochromis_pfefferi	1	f	Mass	7.2	0.0743			Adult		Tsuboi M et al. (2015) Evolution 69:190-200	Lake Tanganyika, Mpulungu, Zambia
Cichliformes	Perciformes	Cichlidae	Gnathochromis	pfefferi		Gnathochromis_pfefferi	1	m	Mass	12.8	0.1192			Adult		Tsuboi M et al. (2015) Evolution 69:190-200	Lake Tanganyika, Mpulungu, Zambia
Cichliformes	Perciformes	Cichlidae	Gnathochromis	pfefferi		Gnathochromis_pfefferi	1	m	Mass	8.9	0.0993			Adult		Tsuboi M et al. (2015) Evolution 69:190-200	Lake Tanganyika, Mpulungu, Zambia
Cichliformes	Perciformes	Cichlidae	Greenwoodochromis	christyi		Greenwoodochromis_christyi	1	f	Mass	22.36	0.119			Adult		Gonzalez-Voyer A et al. (2009) Proc. R. Soc. B 276: 161-167	Wild caught specimen purchased through acquarium trading
Cichliformes	Perciformes	Cichlidae	Greenwoodochromis	christyi		Greenwoodochromis_christyi	1	f	Mass	17.48	0.096			Adult		Gonzalez-Voyer A et al. (2009) Proc. R. Soc. B 276: 161-167	Wild caught specimen purchased through acquarium trading
Cichliformes	Perciformes	Cichlidae	Greenwoodochromis	christyi		Greenwoodochromis_christyi	1	m	Mass	24.1	0.081			Adult		Gonzalez-Voyer A et al. (2009) Proc. R. Soc. B 276: 161-167	Wild caught specimen purchased through acquarium trading
Cichliformes	Perciformes	Cichlidae	Haplotaxodon	microlepis		Haplotaxodon_microlepis	1	f	Mass	10.44	0.094			Adult		Gonzalez-Voyer A et al. (2009) Proc. R. Soc. B 276: 161-167	Wild caught specimen purchased through acquarium trading
Cichliformes	Perciformes	Cichlidae	Haplotaxodon	microlepis		Haplotaxodon_microlepis	1	f	Mass	10.43	0.087			Adult		Gonzalez-Voyer A et al. (2009) Proc. R. Soc. B 276: 161-167	Wild caught specimen purchased through acquarium trading
Cichliformes	Perciformes	Cichlidae	Haplotaxodon	microlepis		Haplotaxodon_microlepis	1	f	Mass	65.5	0.2142			Adult		Tsuboi M et al. (2015) Evolution 69:190-200	Lake Tanganyika, Mpulungu, Zambia
Cichliformes	Perciformes	Cichlidae	Haplotaxodon	microlepis		Haplotaxodon_microlepis	1	f	Mass	32.2	0.1499			Adult		Tsuboi M et al. (2015) Evolution 69:190-200	Lake Tanganyika, Mpulungu, Zambia
Cichliformes	Perciformes	Cichlidae	Haplotaxodon	microlepis		Haplotaxodon_microlepis	1	f	Mass	54.2	0.18			Adult		Tsuboi M et al. (2015) Evolution 69:190-200	Lake Tanganyika, Mpulungu, Zambia
Cichliformes	Perciformes	Cichlidae	Haplotaxodon	microlepis		Haplotaxodon_microlepis	1	f	Mass	47.1	0.1646			Adult		Tsuboi M et al. (2015) Evolution 69:190-200	Lake Tanganyika, Mpulungu, Zambia
Cichliformes	Perciformes	Cichlidae	Haplotaxodon	microlepis		Haplotaxodon_microlepis	1	f	Mass	36	0.1439			Adult		Tsuboi M et al. (2015) Evolution 69:190-200	Lake Tanganyika, Mpulungu, Zambia
Cichliformes	Perciformes	Cichlidae	Haplotaxodon	microlepis		Haplotaxodon_microlepis	1	m	Mass	11.49	0.096			Adult		Gonzalez-Voyer A et al. (2009) Proc. R. Soc. B 276: 161-167	Wild caught specimen purchased through acquarium trading
Cichliformes	Perciformes	Cichlidae	Haplotaxodon	microlepis		Haplotaxodon_microlepis	1	m	Mass	10.1	0.094			Adult		Gonzalez-Voyer A et al. (2009) Proc. R. Soc. B 276: 161-167	Wild caught specimen purchased through acquarium trading
Cichliformes	Perciformes	Cichlidae	Haplotaxodon	microlepis		Haplotaxodon_microlepis	1	m	Mass	10.08	0.1			Adult		Gonzalez-Voyer A et al. (2009) Proc. R. Soc. B 276: 161-167	Wild caught specimen purchased through acquarium trading
Cichliformes	Perciformes	Cichlidae	Haplotaxodon	microlepis		Haplotaxodon_microlepis	1	m	Mass	8.71	0.083			Adult		Gonzalez-Voyer A et al. (2009) Proc. R. Soc. B 276: 161-167	Wild caught specimen purchased through acquarium trading
Cichliformes	Perciformes	Cichlidae	Haplotaxodon	microlepis		Haplotaxodon_microlepis	1	m	Mass	67.6	0.2084			Adult		Tsuboi M et al. (2015) Evolution 69:190-200	Lake Tanganyika, Mpulungu, Zambia
Cichliformes	Perciformes	Cichlidae	Haplotaxodon	microlepis		Haplotaxodon_microlepis	1	m	Mass	45.2	0.1789			Adult		Tsuboi M et al. (2015) Evolution 69:190-200	Lake Tanganyika, Mpulungu, Zambia
Cichliformes	Perciformes	Cichlidae	Haplotaxodon	microlepis		Haplotaxodon_microlepis	1	m	Mass	44.1	0.1667			Adult		Tsuboi M et al. (2015) Evolution 69:190-200	Lake Tanganyika, Mpulungu, Zambia
Cichliformes	Perciformes	Cichlidae	Haplotaxodon	microlepis		Haplotaxodon_microlepis	1	m	Mass	29	0.1454			Adult		Tsuboi M et al. (2015) Evolution 69:190-200	Lake Tanganyika, Mpulungu, Zambia
Cichliformes	Perciformes	Cichlidae	Haplotaxodon	microlepis		Haplotaxodon_microlepis	1	m	Mass	38.4	0.155			Adult		Tsuboi M et al. (2015) Evolution 69:190-200	Lake Tanganyika, Mpulungu, Zambia
Cichliformes	Perciformes	Cichlidae	Haplotaxodon	microlepis		Haplotaxodon_microlepis	1	m	Mass	47.2	0.1693			Adult		Tsuboi M et al. (2015) Evolution 69:190-200	Lake Tanganyika, Mpulungu, Zambia
Cichliformes	Perciformes	Cichlidae	Haplotaxodon	microlepis		Haplotaxodon_microlepis	1	m	Mass	32.9	0.1506			Adult		Tsuboi M et al. (2015) Evolution 69:190-200	Lake Tanganyika, Mpulungu, Zambia
Cichliformes	Perciformes	Cichlidae	Hemibates	stenosoma		Hemibates_stenosoma	1	f	Mass	54.1	0.1733			Adult		Tsuboi M et al. (2015) Evolution 69:190-200	Lake Tanganyika, Mpulungu, Zambia
Cichliformes	Perciformes	Cichlidae	Hemibates	stenosoma		Hemibates_stenosoma	1	f	Mass	51.3	0.1633			Adult		Tsuboi M et al. (2015) Evolution 69:190-200	Lake Tanganyika, Mpulungu, Zambia
Cichliformes	Perciformes	Cichlidae	Hemibates	stenosoma		Hemibates_stenosoma	1	f	Mass	43.7	0.1495			Adult		Tsuboi M et al. (2015) Evolution 69:190-200	Lake Tanganyika, Mpulungu, Zambia
Cichliformes	Perciformes	Cichlidae	Hemibates	stenosoma		Hemibates_stenosoma	1	f	Mass	49.9	0.1426			Adult		Tsuboi M et al. (2015) Evolution 69:190-200	Lake Tanganyika, Mpulungu, Zambia
Cichliformes	Perciformes	Cichlidae	Hemibates	stenosoma		Hemibates_stenosoma	1	f	Mass	192	0.3043			Adult		Tsuboi M et al. (2015) Evolution 69:190-200	Lake Tanganyika, Mpulungu, Zambia
Cichliformes	Perciformes	Cichlidae	Hemibates	stenosoma		Hemibates_stenosoma	1	m	Mass	47.2	0.1637			Adult		Tsuboi M et al. (2015) Evolution 69:190-200	Lake Tanganyika, Mpulungu, Zambia
Cichliformes	Perciformes	Cichlidae	Hemichromis	bimaculatus		Hemichromis_bimaculatus	1	unknown	Mass	12.5	0.056			unknown		Bauchot R, Diagne M, Platel R, Ridet J-M, Bauchot M-L. in Fishbase. www.fishbase.org. date of access: Apr.-13-17
Cichliformes	Perciformes	Cichlidae	Hemichromis	bimaculatus		Hemichromis_bimaculatus	1	unknown	Mass	25.4	0.08	9		unknown		Bauchot R, Diagne M, Platel R, Ridet J-M, Bauchot M-L. in Fishbase. www.fishbase.org. date of access: Apr.-13-17
Cichliformes	Perciformes	Cichlidae	Heros	severus		Heros_severus	1	unknown	Mass	61.8	0.138			unknown		Bauchot R, Diagne M, Platel R, Ridet J-M, Bauchot M-L. in Fishbase. www.fishbase.org. date of access: Apr.-13-17
Cichliformes	Perciformes	Cichlidae	Julidochromis	marlieri		Julidochromis_marlieri	1	f	Mass	4.68	0.041			Adult		Gonzalez-Voyer A et al. (2009) Proc. R. Soc. B 276: 161-167	Wild caught specimen purchased through acquarium trading
Cichliformes	Perciformes	Cichlidae	Julidochromis	marlieri		Julidochromis_marlieri	1	f	Mass	6.84	0.052			Adult		Gonzalez-Voyer A et al. (2009) Proc. R. Soc. B 276: 161-167	Wild caught specimen purchased through acquarium trading
Cichliformes	Perciformes	Cichlidae	Julidochromis	marlieri		Julidochromis_marlieri	1	f	Mass	4.46	0.048			Adult		Gonzalez-Voyer A et al. (2009) Proc. R. Soc. B 276: 161-167	Wild caught specimen purchased through acquarium trading
Cichliformes	Perciformes	Cichlidae	Julidochromis	marlieri		Julidochromis_marlieri	1	f	Mass	6.35	0.052			Adult		Gonzalez-Voyer A et al. (2009) Proc. R. Soc. B 276: 161-167	Wild caught specimen purchased through acquarium trading
Cichliformes	Perciformes	Cichlidae	Julidochromis	marlieri		Julidochromis_marlieri	1	f	Mass	4.54	0.046			Adult		Gonzalez-Voyer A et al. (2009) Proc. R. Soc. B 276: 161-167	Wild caught specimen purchased through acquarium trading
Cichliformes	Perciformes	Cichlidae	Julidochromis	marlieri		Julidochromis_marlieri	1	m	Mass	4.25	0.043			Adult		Gonzalez-Voyer A et al. (2009) Proc. R. Soc. B 276: 161-167	Wild caught specimen purchased through acquarium trading
Cichliformes	Perciformes	Cichlidae	Julidochromis	ornatus		Julidochromis_ornatus	1	f	Mass	3.2	0.0369			Adult		Tsuboi M et al. (2015) Evolution 69:190-200	Lake Tanganyika, Mpulungu, Zambia
Cichliformes	Perciformes	Cichlidae	Julidochromis	ornatus		Julidochromis_ornatus	1	f	Mass	6.7	0.044			Adult		Tsuboi M et al. (2015) Evolution 69:190-200	Lake Tanganyika, Mpulungu, Zambia
Cichliformes	Perciformes	Cichlidae	Julidochromis	ornatus		Julidochromis_ornatus	1	f	Mass	4.6	0.0434			Adult		Tsuboi M et al. (2015) Evolution 69:190-200	Lake Tanganyika, Mpulungu, Zambia
Cichliformes	Perciformes	Cichlidae	Julidochromis	ornatus		Julidochromis_ornatus	1	f	Mass	5.5	0.0483			Adult		Tsuboi M et al. (2015) Evolution 69:190-200	Lake Tanganyika, Mpulungu, Zambia
Cichliformes	Perciformes	Cichlidae	Julidochromis	ornatus		Julidochromis_ornatus	1	f	Mass	3.3	0.039			Adult		Tsuboi M et al. (2015) Evolution 69:190-200	Lake Tanganyika, Mpulungu, Zambia
Cichliformes	Perciformes	Cichlidae	Julidochromis	ornatus		Julidochromis_ornatus	1	f	Mass	5.5	0.0464			Adult		Tsuboi M et al. (2015) Evolution 69:190-200	Lake Tanganyika, Mpulungu, Zambia
Cichliformes	Perciformes	Cichlidae	Julidochromis	ornatus		Julidochromis_ornatus	1	f	Mass	2.5	0.0285			Adult		Tsuboi M et al. (2015) Evolution 69:190-200	Lake Tanganyika, Mpulungu, Zambia
Cichliformes	Perciformes	Cichlidae	Julidochromis	ornatus		Julidochromis_ornatus	1	f	Mass	4.8	0.0429			Adult		Tsuboi M et al. (2015) Evolution 69:190-200	Lake Tanganyika, Mpulungu, Zambia
Cichliformes	Perciformes	Cichlidae	Julidochromis	ornatus		Julidochromis_ornatus	1	m	Mass	4.47	0.0456			Adult		Reddon AR et al. (2016) Can. J. Zool. 94: 1-6	Lake Tanganyika, Mpulungu, Zambia
Cichliformes	Perciformes	Cichlidae	Julidochromis	ornatus		Julidochromis_ornatus	1	m	Mass	4.02	0.0399			Adult		Reddon AR et al. (2016) Can. J. Zool. 94: 1-6	Lake Tanganyika, Mpulungu, Zambia
Cichliformes	Perciformes	Cichlidae	Julidochromis	ornatus		Julidochromis_ornatus	1	m	Mass	5.57	0.0387			Adult		Reddon AR et al. (2016) Can. J. Zool. 94: 1-6	Lake Tanganyika, Mpulungu, Zambia
Cichliformes	Perciformes	Cichlidae	Julidochromis	ornatus		Julidochromis_ornatus	1	m	Mass	3.42	0.0399			Adult		Reddon AR et al. (2016) Can. J. Zool. 94: 1-6	Lake Tanganyika, Mpulungu, Zambia
Cichliformes	Perciformes	Cichlidae	Julidochromis	ornatus		Julidochromis_ornatus	1	m	Mass	3.56	0.0354			Adult		Reddon AR et al. (2016) Can. J. Zool. 94: 1-6	Lake Tanganyika, Mpulungu, Zambia
Cichliformes	Perciformes	Cichlidae	Julidochromis	ornatus		Julidochromis_ornatus	1	m	Mass	4.11	0.0431			Adult		Reddon AR et al. (2016) Can. J. Zool. 94: 1-6	Lake Tanganyika, Mpulungu, Zambia
Cichliformes	Perciformes	Cichlidae	Julidochromis	ornatus		Julidochromis_ornatus	1	m	Mass	6.4	0.0424			Adult		Reddon AR et al. (2016) Can. J. Zool. 94: 1-6	Lake Tanganyika, Mpulungu, Zambia
Cichliformes	Perciformes	Cichlidae	Julidochromis	ornatus		Julidochromis_ornatus	1	m	Mass	4.14	0.0479			Adult		Reddon AR et al. (2016) Can. J. Zool. 94: 1-6	Lake Tanganyika, Mpulungu, Zambia
Cichliformes	Perciformes	Cichlidae	Julidochromis	ornatus		Julidochromis_ornatus	1	m	Mass	3.83	0.0402			Adult		Reddon AR et al. (2016) Can. J. Zool. 94: 1-6	Lake Tanganyika, Mpulungu, Zambia
Cichliformes	Perciformes	Cichlidae	Julidochromis	ornatus		Julidochromis_ornatus	1	m	Mass	6.31	0.045			Adult		Reddon AR et al. (2016) Can. J. Zool. 94: 1-6	Lake Tanganyika, Mpulungu, Zambia
Cichliformes	Perciformes	Cichlidae	Julidochromis	ornatus		Julidochromis_ornatus	1	m	Mass	4.3	0.0405			Adult		Tsuboi M et al. (2015) Evolution 69:190-200	Lake Tanganyika, Mpulungu, Zambia
Cichliformes	Perciformes	Cichlidae	Julidochromis	ornatus		Julidochromis_ornatus	1	m	Mass	3.6	0.0379			Adult		Tsuboi M et al. (2015) Evolution 69:190-200	Lake Tanganyika, Mpulungu, Zambia
Cichliformes	Perciformes	Cichlidae	Julidochromis	ornatus		Julidochromis_ornatus	1	m	Mass	6.7	0.0504			Adult		Tsuboi M et al. (2015) Evolution 69:190-200	Lake Tanganyika, Mpulungu, Zambia
Cichliformes	Perciformes	Cichlidae	Julidochromis	ornatus		Julidochromis_ornatus	1	m	Mass	4.7	0.0407			Adult		Tsuboi M et al. (2015) Evolution 69:190-200	Lake Tanganyika, Mpulungu, Zambia
Cichliformes	Perciformes	Cichlidae	Julidochromis	ornatus		Julidochromis_ornatus	1	m	Mass	3.5	0.0384			Adult		Tsuboi M et al. (2015) Evolution 69:190-200	Lake Tanganyika, Mpulungu, Zambia
Cichliformes	Perciformes	Cichlidae	Julidochromis	regani		Julidochromis_regani	1	f	Mass	7.05	0.056			Adult		Gonzalez-Voyer A et al. (2009) Proc. R. Soc. B 276: 161-167	Wild caught specimen purchased through acquarium trading
Cichliformes	Perciformes	Cichlidae	Julidochromis	regani		Julidochromis_regani	1	f	Mass	10.15	0.061			Adult		Gonzalez-Voyer A et al. (2009) Proc. R. Soc. B 276: 161-167	Wild caught specimen purchased through acquarium trading
Cichliformes	Perciformes	Cichlidae	Julidochromis	regani		Julidochromis_regani	1	f	Mass	8.7	0.052			Adult		Gonzalez-Voyer A et al. (2009) Proc. R. Soc. B 276: 161-167	Wild caught specimen purchased through acquarium trading
Cichliformes	Perciformes	Cichlidae	Julidochromis	regani		Julidochromis_regani	1	f	Mass	7.74	0.049			Adult		Gonzalez-Voyer A et al. (2009) Proc. R. Soc. B 276: 161-167	Wild caught specimen purchased through acquarium trading
Cichliformes	Perciformes	Cichlidae	Julidochromis	regani		Julidochromis_regani	1	m	Mass	9.7	0.056			Adult		Gonzalez-Voyer A et al. (2009) Proc. R. Soc. B 276: 161-167	Wild caught specimen purchased through acquarium trading
Cichliformes	Perciformes	Cichlidae	Julidochromis	regani		Julidochromis_regani	1	m	Mass	4.24	0.043			Adult		Gonzalez-Voyer A et al. (2009) Proc. R. Soc. B 276: 161-167	Wild caught specimen purchased through acquarium trading
Cichliformes	Perciformes	Cichlidae	Lamprologus	callipterus		Lamprologus_callipterus	1	m	Mass	5.24	0.044			Adult		Gonzalez-Voyer A et al. (2009) Proc. R. Soc. B 276: 161-167	Wild caught specimen purchased through acquarium trading
Cichliformes	Perciformes	Cichlidae	Lamprologus	callipterus		Lamprologus_callipterus	1	m	Mass	19.74	0.074			Adult		Gonzalez-Voyer A et al. (2009) Proc. R. Soc. B 276: 161-167	Wild caught specimen purchased through acquarium trading
Cichliformes	Perciformes	Cichlidae	Lamprologus	callipterus		Lamprologus_callipterus	1	m	Mass	5.67	0.043			Adult		Gonzalez-Voyer A et al. (2009) Proc. R. Soc. B 276: 161-167	Wild caught specimen purchased through acquarium trading
Cichliformes	Perciformes	Cichlidae	Lamprologus	callipterus		Lamprologus_callipterus	1	m	Mass	3.35	0.036			Adult		Gonzalez-Voyer A et al. (2009) Proc. R. Soc. B 276: 161-167	Wild caught specimen purchased through acquarium trading
Cichliformes	Perciformes	Cichlidae	Lamprologus	ocellatus		Lamprologus_ocellatus	1	m	Mass	3.82	0.0368			Adult		Reddon AR et al. (2016) Can. J. Zool. 94: 1-6	Lake Tanganyika, Mpulungu, Zambia
Cichliformes	Perciformes	Cichlidae	Lamprologus	ocellatus		Lamprologus_ocellatus	1	m	Mass	4.46	0.0317			Adult		Reddon AR et al. (2016) Can. J. Zool. 94: 1-6	Lake Tanganyika, Mpulungu, Zambia
Cichliformes	Perciformes	Cichlidae	Lamprologus	ocellatus		Lamprologus_ocellatus	1	m	Mass	4.56	0.0332			Adult		Reddon AR et al. (2016) Can. J. Zool. 94: 1-6	Lake Tanganyika, Mpulungu, Zambia
Cichliformes	Perciformes	Cichlidae	Lamprologus	ocellatus		Lamprologus_ocellatus	1	m	Mass	3.26	0.0301			Adult		Reddon AR et al. (2016) Can. J. Zool. 94: 1-6	Lake Tanganyika, Mpulungu, Zambia
Cichliformes	Perciformes	Cichlidae	Lamprologus	ocellatus		Lamprologus_ocellatus	1	m	Mass	3.67	0.0294			Adult		Reddon AR et al. (2016) Can. J. Zool. 94: 1-6	Lake Tanganyika, Mpulungu, Zambia
Cichliformes	Perciformes	Cichlidae	Lamprologus	ocellatus		Lamprologus_ocellatus	1	m	Mass	2.23	0.0256			Adult		Reddon AR et al. (2016) Can. J. Zool. 94: 1-6	Lake Tanganyika, Mpulungu, Zambia
Cichliformes	Perciformes	Cichlidae	Lamprologus	ocellatus		Lamprologus_ocellatus	1	m	Mass	3.19	0.0312			Adult		Reddon AR et al. (2016) Can. J. Zool. 94: 1-6	Lake Tanganyika, Mpulungu, Zambia
Cichliformes	Perciformes	Cichlidae	Lamprologus	ocellatus		Lamprologus_ocellatus	1	m	Mass	3.87	0.0442			Adult		Reddon AR et al. (2016) Can. J. Zool. 94: 1-6	Lake Tanganyika, Mpulungu, Zambia
Cichliformes	Perciformes	Cichlidae	Lamprologus	ocellatus		Lamprologus_ocellatus	1	m	Mass	4.19	0.0474			Adult		Reddon AR et al. (2016) Can. J. Zool. 94: 1-6	Lake Tanganyika, Mpulungu, Zambia
Cichliformes	Perciformes	Cichlidae	Lamprologus	ocellatus		Lamprologus_ocellatus	1	m	Mass	3.56	0.0227			Adult		Reddon AR et al. (2016) Can. J. Zool. 94: 1-6	Lake Tanganyika, Mpulungu, Zambia
Cichliformes	Perciformes	Cichlidae	Lamprologus	ornatipinnis		Lamprologus_ornatipinnis	1	f	Mass	1.3	0.0192			Adult		Tsuboi M et al. (2015) Evolution 69:190-200	Lake Tanganyika, Mpulungu, Zambia
Cichliformes	Perciformes	Cichlidae	Lamprologus	ornatipinnis		Lamprologus_ornatipinnis	1	f	Mass	1.3	0.0204			Adult		Tsuboi M et al. (2015) Evolution 69:190-200	Lake Tanganyika, Mpulungu, Zambia
Cichliformes	Perciformes	Cichlidae	Lamprologus	ornatipinnis		Lamprologus_ornatipinnis	1	m	Mass	2.9	0.0298			Adult		Tsuboi M et al. (2015) Evolution 69:190-200	Lake Tanganyika, Mpulungu, Zambia
Cichliformes	Perciformes	Cichlidae	Lamprologus	ornatipinnis		Lamprologus_ornatipinnis	1	m	Mass	2.8	0.0288			Adult		Tsuboi M et al. (2015) Evolution 69:190-200	Lake Tanganyika, Mpulungu, Zambia
Cichliformes	Perciformes	Cichlidae	Lamprologus	ornatipinnis		Lamprologus_ornatipinnis	1	m	Mass	2.5	0.0255			Adult		Tsuboi M et al. (2015) Evolution 69:190-200	Lake Tanganyika, Mpulungu, Zambia
Cichliformes	Perciformes	Cichlidae	Lamprologus	ornatipinnis		Lamprologus_ornatipinnis	1	m	Mass	2.8	0.0334			Adult		Tsuboi M et al. (2015) Evolution 69:190-200	Lake Tanganyika, Mpulungu, Zambia
Cichliformes	Perciformes	Cichlidae	Lamprologus	ornatipinnis		Lamprologus_ornatipinnis	1	m	Mass	3.4	0.0424			Adult		Tsuboi M et al. (2015) Evolution 69:190-200	Lake Tanganyika, Mpulungu, Zambia
Cichliformes	Perciformes	Cichlidae	Lamprologus	ornatipinnis		Lamprologus_ornatipinnis	1	m	Mass	2.1	0.0295			Adult		Tsuboi M et al. (2015) Evolution 69:190-200	Lake Tanganyika, Mpulungu, Zambia
Cichliformes	Perciformes	Cichlidae	Lamprologus	ornatipinnis		Lamprologus_ornatipinnis	1	m	Mass	2.8	0.0346			Adult		Tsuboi M et al. (2015) Evolution 69:190-200	Lake Tanganyika, Mpulungu, Zambia
Cichliformes	Perciformes	Cichlidae	Lepidiolamprologus	elongatus		Lepidiolamprologus_elongatus	1	f	Mass	39.2	0.1584			Adult		Tsuboi M et al. (2015) Evolution 69:190-200	Lake Tanganyika, Mpulungu, Zambia
Cichliformes	Perciformes	Cichlidae	Lepidiolamprologus	elongatus		Lepidiolamprologus_elongatus	1	f	Mass	45.8	0.1668			Adult		Tsuboi M et al. (2015) Evolution 69:190-200	Lake Tanganyika, Mpulungu, Zambia
Cichliformes	Perciformes	Cichlidae	Lepidiolamprologus	elongatus		Lepidiolamprologus_elongatus	1	f	Mass	25.2	0.1213			Adult		Tsuboi M et al. (2015) Evolution 69:190-200	Lake Tanganyika, Mpulungu, Zambia
Cichliformes	Perciformes	Cichlidae	Lepidiolamprologus	elongatus		Lepidiolamprologus_elongatus	1	f	Mass	39.1	0.1732			Adult		Tsuboi M et al. (2015) Evolution 69:190-200	Lake Tanganyika, Mpulungu, Zambia
Cichliformes	Perciformes	Cichlidae	Lepidiolamprologus	elongatus		Lepidiolamprologus_elongatus	1	f	Mass	30.4	0.1258			Adult		Tsuboi M et al. (2015) Evolution 69:190-200	Lake Tanganyika, Mpulungu, Zambia
Cichliformes	Perciformes	Cichlidae	Lepidiolamprologus	elongatus		Lepidiolamprologus_elongatus	1	f	Mass	23.5	0.1254			Adult		Tsuboi M et al. (2015) Evolution 69:190-200	Lake Tanganyika, Mpulungu, Zambia
Cichliformes	Perciformes	Cichlidae	Lepidiolamprologus	elongatus		Lepidiolamprologus_elongatus	1	f	Mass	11.4	0.0951			Adult		Tsuboi M et al. (2015) Evolution 69:190-200	Lake Tanganyika, Mpulungu, Zambia
Cichliformes	Perciformes	Cichlidae	Lepidiolamprologus	elongatus		Lepidiolamprologus_elongatus	1	f	Mass	6.6	0.0734			Adult		Tsuboi M et al. (2015) Evolution 69:190-200	Lake Tanganyika, Mpulungu, Zambia
Cichliformes	Perciformes	Cichlidae	Lepidiolamprologus	elongatus		Lepidiolamprologus_elongatus	1	m	Mass	56.7	0.169			Adult		Tsuboi M et al. (2015) Evolution 69:190-200	Lake Tanganyika, Mpulungu, Zambia
Cichliformes	Perciformes	Cichlidae	Lepidiolamprologus	elongatus		Lepidiolamprologus_elongatus	1	m	Mass	30	0.1419			Adult		Tsuboi M et al. (2015) Evolution 69:190-200	Lake Tanganyika, Mpulungu, Zambia
Cichliformes	Perciformes	Cichlidae	Lepidiolamprologus	elongatus		Lepidiolamprologus_elongatus	1	m	Mass	45	0.1519			Adult		Tsuboi M et al. (2015) Evolution 69:190-200	Lake Tanganyika, Mpulungu, Zambia
Cichliformes	Perciformes	Cichlidae	Lepidiolamprologus	elongatus		Lepidiolamprologus_elongatus	1	m	Mass	30.6	0.1328			Adult		Tsuboi M et al. (2015) Evolution 69:190-200	Lake Tanganyika, Mpulungu, Zambia
Cichliformes	Perciformes	Cichlidae	Lepidiolamprologus	elongatus		Lepidiolamprologus_elongatus	1	m	Mass	23.9	0.1182			Adult		Tsuboi M et al. (2015) Evolution 69:190-200	Lake Tanganyika, Mpulungu, Zambia
Cichliformes	Perciformes	Cichlidae	Lepidiolamprologus	elongatus		Lepidiolamprologus_elongatus	1	m	Mass	12.4	0.0924			Adult		Tsuboi M et al. (2015) Evolution 69:190-200	Lake Tanganyika, Mpulungu, Zambia
Cichliformes	Perciformes	Cichlidae	Lepidiolamprologus	elongatus		Lepidiolamprologus_elongatus	1	m	Mass	34.7	0.1483			Adult		Tsuboi M et al. (2015) Evolution 69:190-200	Lake Tanganyika, Mpulungu, Zambia
Cichliformes	Perciformes	Cichlidae	Lepidiolamprologus	lemairii		Lepidiolamprologus_lemairii	1	unknown	Mass	9.8	0.0781			Adult		Tsuboi M et al. (2015) Evolution 69:190-200	Lake Tanganyika, Mpulungu, Zambia
Cichliformes	Perciformes	Cichlidae	Lepidiolamprologus	nkambae		Lepidiolamprologus_nkambae	1	f	Mass	17.5	0.084			Adult		Gonzalez-Voyer A et al. (2009) Proc. R. Soc. B 276: 161-167	Wild caught specimen purchased through acquarium trading
Cichliformes	Perciformes	Cichlidae	Lepidiolamprologus	nkambae		Lepidiolamprologus_nkambae	1	m	Mass	11.21	0.061			Adult		Gonzalez-Voyer A et al. (2009) Proc. R. Soc. B 276: 161-167	Wild caught specimen purchased through acquarium trading
Cichliformes	Perciformes	Cichlidae	Lepidiolamprologus	nkambae		Lepidiolamprologus_nkambae	1	m	Mass	41.27	0.133			Adult		Gonzalez-Voyer A et al. (2009) Proc. R. Soc. B 276: 161-167	Wild caught specimen purchased through acquarium trading
Cichliformes	Perciformes	Cichlidae	Lepidiolamprologus	nkambae		Lepidiolamprologus_nkambae	1	m	Mass	21.91	0.098			Adult		Gonzalez-Voyer A et al. (2009) Proc. R. Soc. B 276: 161-167	Wild caught specimen purchased through acquarium trading
Cichliformes	Perciformes	Cichlidae	Lepidiolamprologus	nkambae		Lepidiolamprologus_nkambae	1	m	Mass	5.39	0.05			Adult		Gonzalez-Voyer A et al. (2009) Proc. R. Soc. B 276: 161-167	Wild caught specimen purchased through acquarium trading
Cichliformes	Perciformes	Cichlidae	Lepidiolamprologus	nkambae		Lepidiolamprologus_nkambae	1	m	Mass	14.88	0.088			Adult		Gonzalez-Voyer A et al. (2009) Proc. R. Soc. B 276: 161-167	Wild caught specimen purchased through acquarium trading
Cichliformes	Perciformes	Cichlidae	Lepidiolamprologus	profundicola		Lepidiolamprologus_profundicola	1	f	Mass	60.7	0.1443			Adult		Tsuboi M et al. (2015) Evolution 69:190-200	Lake Tanganyika, Mpulungu, Zambia
Cichliformes	Perciformes	Cichlidae	Lepidiolamprologus	profundicola		Lepidiolamprologus_profundicola	1	f	Mass	25.5	0.0964			Adult		Tsuboi M et al. (2015) Evolution 69:190-200	Lake Tanganyika, Mpulungu, Zambia
Cichliformes	Perciformes	Cichlidae	Lepidiolamprologus	profundicola		Lepidiolamprologus_profundicola	1	f	Mass	37.6	0.1172			Adult		Tsuboi M et al. (2015) Evolution 69:190-200	Lake Tanganyika, Mpulungu, Zambia
Cichliformes	Perciformes	Cichlidae	Lepidiolamprologus	profundicola		Lepidiolamprologus_profundicola	1	f	Mass	44.5	0.1272			Adult		Tsuboi M et al. (2015) Evolution 69:190-200	Lake Tanganyika, Mpulungu, Zambia
Cichliformes	Perciformes	Cichlidae	Lepidiolamprologus	profundicola		Lepidiolamprologus_profundicola	1	f	Mass	47.7	0.1378			Adult		Tsuboi M et al. (2015) Evolution 69:190-200	Lake Tanganyika, Mpulungu, Zambia
Cichliformes	Perciformes	Cichlidae	Lepidiolamprologus	profundicola		Lepidiolamprologus_profundicola	1	f	Mass	27	0.099			Adult		Tsuboi M et al. (2015) Evolution 69:190-200	Lake Tanganyika, Mpulungu, Zambia
Cichliformes	Perciformes	Cichlidae	Lepidiolamprologus	profundicola		Lepidiolamprologus_profundicola	1	f	Mass	29.7	0.0997			Adult		Tsuboi M et al. (2015) Evolution 69:190-200	Lake Tanganyika, Mpulungu, Zambia
Cichliformes	Perciformes	Cichlidae	Lepidiolamprologus	profundicola		Lepidiolamprologus_profundicola	1	f	Mass	43.8	0.1434			Adult		Tsuboi M et al. (2015) Evolution 69:190-200	Lake Tanganyika, Mpulungu, Zambia
Cichliformes	Perciformes	Cichlidae	Lepidiolamprologus	profundicola		Lepidiolamprologus_profundicola	1	f	Mass	30.7	0.1067			Adult		Tsuboi M et al. (2015) Evolution 69:190-200	Lake Tanganyika, Mpulungu, Zambia
Cichliformes	Perciformes	Cichlidae	Lepidiolamprologus	profundicola		Lepidiolamprologus_profundicola	1	m	Mass	86.5	0.1644			Adult		Tsuboi M et al. (2015) Evolution 69:190-200	Lake Tanganyika, Mpulungu, Zambia
Cichliformes	Perciformes	Cichlidae	Lepidiolamprologus	profundicola		Lepidiolamprologus_profundicola	1	m	Mass	64	0.1557			Adult		Tsuboi M et al. (2015) Evolution 69:190-200	Lake Tanganyika, Mpulungu, Zambia
Cichliformes	Perciformes	Cichlidae	Lepidiolamprologus	profundicola		Lepidiolamprologus_profundicola	1	m	Mass	78.2	0.1678			Adult		Tsuboi M et al. (2015) Evolution 69:190-200	Lake Tanganyika, Mpulungu, Zambia
Cichliformes	Perciformes	Cichlidae	Lepidiolamprologus	profundicola		Lepidiolamprologus_profundicola	1	m	Mass	26.4	0.0935			Adult		Tsuboi M et al. (2015) Evolution 69:190-200	Lake Tanganyika, Mpulungu, Zambia
Cichliformes	Perciformes	Cichlidae	Lepidiolamprologus	profundicola		Lepidiolamprologus_profundicola	1	m	Mass	78	0.1618			Adult		Tsuboi M et al. (2015) Evolution 69:190-200	Lake Tanganyika, Mpulungu, Zambia
Cichliformes	Perciformes	Cichlidae	Limnochromis	staneri		Limnochromis_staneri	1	f	Mass	29.8	0.1413			Adult		Tsuboi M et al. (2015) Evolution 69:190-200	Lake Tanganyika, Mpulungu, Zambia
Cichliformes	Perciformes	Cichlidae	Limnochromis	staneri		Limnochromis_staneri	1	f	Mass	23.7	0.1729			Adult		Tsuboi M et al. (2015) Evolution 69:190-200	Lake Tanganyika, Mpulungu, Zambia
Cichliformes	Perciformes	Cichlidae	Limnochromis	staneri		Limnochromis_staneri	1	f	Mass	34.5	0.135			Adult		Tsuboi M et al. (2015) Evolution 69:190-200	Lake Tanganyika, Mpulungu, Zambia
Cichliformes	Perciformes	Cichlidae	Limnochromis	staneri		Limnochromis_staneri	1	f	Mass	29.3	0.1321			Adult		Tsuboi M et al. (2015) Evolution 69:190-200	Lake Tanganyika, Mpulungu, Zambia
Cichliformes	Perciformes	Cichlidae	Limnochromis	staneri		Limnochromis_staneri	1	f	Mass	27.8	0.1102			Adult		Tsuboi M et al. (2015) Evolution 69:190-200	Lake Tanganyika, Mpulungu, Zambia
Cichliformes	Perciformes	Cichlidae	Limnochromis	staneri		Limnochromis_staneri	1	f	Mass	31.5	0.1032			Adult		Tsuboi M et al. (2015) Evolution 69:190-200	Lake Tanganyika, Mpulungu, Zambia
Cichliformes	Perciformes	Cichlidae	Limnochromis	staneri		Limnochromis_staneri	1	f	Mass	31.1	0.1311			Adult		Tsuboi M et al. (2015) Evolution 69:190-200	Lake Tanganyika, Mpulungu, Zambia
Cichliformes	Perciformes	Cichlidae	Limnochromis	staneri		Limnochromis_staneri	1	m	Mass	57.7	0.1724			Adult		Tsuboi M et al. (2015) Evolution 69:190-200	Lake Tanganyika, Mpulungu, Zambia
Cichliformes	Perciformes	Cichlidae	Limnochromis	staneri		Limnochromis_staneri	1	m	Mass	70.4	0.2145			Adult		Tsuboi M et al. (2015) Evolution 69:190-200	Lake Tanganyika, Mpulungu, Zambia
Cichliformes	Perciformes	Cichlidae	Limnochromis	staneri		Limnochromis_staneri	1	m	Mass	37.9	0.1354			Adult		Tsuboi M et al. (2015) Evolution 69:190-200	Lake Tanganyika, Mpulungu, Zambia
Cichliformes	Perciformes	Cichlidae	Limnotilapia	dardennii		Limnotilapia_dardennii	1	f	Mass	3.95	0.065			Adult		Gonzalez-Voyer A et al. (2009) Proc. R. Soc. B 276: 161-167	Wild caught specimen purchased through acquarium trading
Cichliformes	Perciformes	Cichlidae	Limnotilapia	dardennii		Limnotilapia_dardennii	1	f	Mass	3	0.058			Adult		Gonzalez-Voyer A et al. (2009) Proc. R. Soc. B 276: 161-167	Wild caught specimen purchased through acquarium trading
Cichliformes	Perciformes	Cichlidae	Limnotilapia	dardennii		Limnotilapia_dardennii	1	f	Mass	34.6	0.198			Adult		Tsuboi M et al. (2015) Evolution 69:190-200	Lake Tanganyika, Mpulungu, Zambia
Cichliformes	Perciformes	Cichlidae	Limnotilapia	dardennii		Limnotilapia_dardennii	1	m	Mass	2.99	0.054			Adult		Gonzalez-Voyer A et al. (2009) Proc. R. Soc. B 276: 161-167	Wild caught specimen purchased through acquarium trading
Cichliformes	Perciformes	Cichlidae	Limnotilapia	dardennii		Limnotilapia_dardennii	1	m	Mass	2.91	0.06			Adult		Gonzalez-Voyer A et al. (2009) Proc. R. Soc. B 276: 161-167	Wild caught specimen purchased through acquarium trading
Cichliformes	Perciformes	Cichlidae	Limnotilapia	dardennii		Limnotilapia_dardennii	1	m	Mass	2.48	0.052			Adult		Gonzalez-Voyer A et al. (2009) Proc. R. Soc. B 276: 161-167	Wild caught specimen purchased through acquarium trading
Cichliformes	Perciformes	Cichlidae	Limnotilapia	dardennii		Limnotilapia_dardennii	1	m	Mass	3.15	0.056			Adult		Gonzalez-Voyer A et al. (2009) Proc. R. Soc. B 276: 161-167	Wild caught specimen purchased through acquarium trading
Cichliformes	Perciformes	Cichlidae	Limnotilapia	dardennii		Limnotilapia_dardennii	1	m	Mass	99.4	0.2821			Adult		Tsuboi M et al. (2015) Evolution 69:190-200	Lake Tanganyika, Mpulungu, Zambia
Cichliformes	Perciformes	Cichlidae	Limnotilapia	dardennii		Limnotilapia_dardennii	1	m	Mass	149.4	0.3545			Adult		Tsuboi M et al. (2015) Evolution 69:190-200	Lake Tanganyika, Mpulungu, Zambia
Cichliformes	Perciformes	Cichlidae	Limnotilapia	dardennii		Limnotilapia_dardennii	1	m	Mass	110.9	0.3028			Adult		Tsuboi M et al. (2015) Evolution 69:190-200	Lake Tanganyika, Mpulungu, Zambia
Cichliformes	Perciformes	Cichlidae	Lobochilotes	labiatus		Lobochilotes_labiatus	1	f	Mass	55.9	0.308			Adult		Tsuboi M et al. (2015) Evolution 69:190-200	Lake Tanganyika, Mpulungu, Zambia
Cichliformes	Perciformes	Cichlidae	Lobochilotes	labiatus		Lobochilotes_labiatus	1	f	Mass	122.4	0.3966			Adult		Tsuboi M et al. (2015) Evolution 69:190-200	Lake Tanganyika, Mpulungu, Zambia
Cichliformes	Perciformes	Cichlidae	Lobochilotes	labiatus		Lobochilotes_labiatus	1	f	Mass	57.3	0.3128			Adult		Tsuboi M et al. (2015) Evolution 69:190-200	Lake Tanganyika, Mpulungu, Zambia
Cichliformes	Perciformes	Cichlidae	Lobochilotes	labiatus		Lobochilotes_labiatus	1	f	Mass	27.4	0.2294			Adult		Tsuboi M et al. (2015) Evolution 69:190-200	Lake Tanganyika, Mpulungu, Zambia
Cichliformes	Perciformes	Cichlidae	Lobochilotes	labiatus		Lobochilotes_labiatus	1	f	Mass	29	0.227			Adult		Tsuboi M et al. (2015) Evolution 69:190-200	Lake Tanganyika, Mpulungu, Zambia
Cichliformes	Perciformes	Cichlidae	Lobochilotes	labiatus		Lobochilotes_labiatus	1	f	Mass	25.6	0.2209			Adult		Tsuboi M et al. (2015) Evolution 69:190-200	Lake Tanganyika, Mpulungu, Zambia
Cichliformes	Perciformes	Cichlidae	Lobochilotes	labiatus		Lobochilotes_labiatus	1	m	Mass	83.3	0.3378			Adult		Tsuboi M et al. (2015) Evolution 69:190-200	Lake Tanganyika, Mpulungu, Zambia
Cichliformes	Perciformes	Cichlidae	Lobochilotes	labiatus		Lobochilotes_labiatus	1	m	Mass	31.3	0.2326			Adult		Tsuboi M et al. (2015) Evolution 69:190-200	Lake Tanganyika, Mpulungu, Zambia
Cichliformes	Perciformes	Cichlidae	Lobochilotes	labiatus		Lobochilotes_labiatus	1	m	Mass	24.1	0.1911			Adult		Tsuboi M et al. (2015) Evolution 69:190-200	Lake Tanganyika, Mpulungu, Zambia
Cichliformes	Perciformes	Cichlidae	Lobochilotes	labiatus		Lobochilotes_labiatus	1	m	Mass	16.2	0.1711			Adult		Tsuboi M et al. (2015) Evolution 69:190-200	Lake Tanganyika, Mpulungu, Zambia
Cichliformes	Perciformes	Cichlidae	Lobochilotes	labiatus		Lobochilotes_labiatus	1	m	Mass	18.4	0.1712			Adult		Tsuboi M et al. (2015) Evolution 69:190-200	Lake Tanganyika, Mpulungu, Zambia
Cichliformes	Perciformes	Cichlidae	Lobochilotes	labiatus		Lobochilotes_labiatus	1	m	Mass	15.3	0.1618			Adult		Tsuboi M et al. (2015) Evolution 69:190-200	Lake Tanganyika, Mpulungu, Zambia
Cichliformes	Perciformes	Cichlidae	Lobochilotes	labiatus		Lobochilotes_labiatus	1	m	Mass	17.9	0.1835			Adult		Tsuboi M et al. (2015) Evolution 69:190-200	Lake Tanganyika, Mpulungu, Zambia
Cichliformes	Perciformes	Cichlidae	Lobochilotes	labiatus		Lobochilotes_labiatus	1	m	Mass	38.2	0.2594			Adult		Tsuboi M et al. (2015) Evolution 69:190-200	Lake Tanganyika, Mpulungu, Zambia
Cichliformes	Perciformes	Cichlidae	Neolamprologus	brevis		Neolamprologus_brevis	1	f	Mass	0.52	0.015			Adult		Gonzalez-Voyer A et al. (2009) Proc. R. Soc. B 276: 161-167	Wild caught specimen purchased through acquarium trading
Cichliformes	Perciformes	Cichlidae	Neolamprologus	brevis		Neolamprologus_brevis	1	m	Mass	2.69	0.029			Adult		Gonzalez-Voyer A et al. (2009) Proc. R. Soc. B 276: 161-167	Wild caught specimen purchased through acquarium trading
Cichliformes	Perciformes	Cichlidae	Neolamprologus	brevis		Neolamprologus_brevis	1	m	Mass	3.23	0.028			Adult		Gonzalez-Voyer A et al. (2009) Proc. R. Soc. B 276: 161-167	Wild caught specimen purchased through acquarium trading
Cichliformes	Perciformes	Cichlidae	Neolamprologus	brichardi		Neolamprologus_brichardi	1	f	Mass	4.8	0.037			Adult		Gonzalez-Voyer A et al. (2009) Proc. R. Soc. B 276: 161-167	Wild caught specimen purchased through acquarium trading
Cichliformes	Perciformes	Cichlidae	Neolamprologus	brichardi		Neolamprologus_brichardi	1	f	Mass	5.88	0.036			Adult		Gonzalez-Voyer A et al. (2009) Proc. R. Soc. B 276: 161-167	Wild caught specimen purchased through acquarium trading
Cichliformes	Perciformes	Cichlidae	Neolamprologus	brichardi		Neolamprologus_brichardi	1	f	Mass	6.1	0.037			Adult		Gonzalez-Voyer A et al. (2009) Proc. R. Soc. B 276: 161-167	Wild caught specimen purchased through acquarium trading
Cichliformes	Perciformes	Cichlidae	Neolamprologus	brichardi		Neolamprologus_brichardi	1	f	Mass	5.15	0.033			Adult		Gonzalez-Voyer A et al. (2009) Proc. R. Soc. B 276: 161-167	Wild caught specimen purchased through acquarium trading
Cichliformes	Perciformes	Cichlidae	Neolamprologus	brichardi		Neolamprologus_brichardi	1	f	Mass	3.75	0.038			Adult		Gonzalez-Voyer A et al. (2009) Proc. R. Soc. B 276: 161-167	Wild caught specimen purchased through acquarium trading
Cichliformes	Perciformes	Cichlidae	Neolamprologus	brichardi		Neolamprologus_brichardi	1	f	Mass	3.49	0.034			Adult		Gonzalez-Voyer A et al. (2009) Proc. R. Soc. B 276: 161-167	Wild caught specimen purchased through acquarium trading
Cichliformes	Perciformes	Cichlidae	Neolamprologus	brichardi		Neolamprologus_brichardi	1	m	Mass	5.4	0.037			Adult		Gonzalez-Voyer A et al. (2009) Proc. R. Soc. B 276: 161-167	Wild caught specimen purchased through acquarium trading
Cichliformes	Perciformes	Cichlidae	Neolamprologus	modestus		Neolamprologus_modestus	1	m	Mass	11.5	0.0854			Adult		Reddon AR et al. (2016) Can. J. Zool. 94: 1-6	Lake Tanganyika, Mpulungu, Zambia
Cichliformes	Perciformes	Cichlidae	Neolamprologus	modestus		Neolamprologus_modestus	1	m	Mass	13.3	0.0893			Adult		Reddon AR et al. (2016) Can. J. Zool. 94: 1-6	Lake Tanganyika, Mpulungu, Zambia
Cichliformes	Perciformes	Cichlidae	Neolamprologus	modestus		Neolamprologus_modestus	1	m	Mass	10.4	0.0837			Adult		Reddon AR et al. (2016) Can. J. Zool. 94: 1-6	Lake Tanganyika, Mpulungu, Zambia
Cichliformes	Perciformes	Cichlidae	Neolamprologus	modestus		Neolamprologus_modestus	1	m	Mass	7.7	0.0825			Adult		Reddon AR et al. (2016) Can. J. Zool. 94: 1-6	Lake Tanganyika, Mpulungu, Zambia
Cichliformes	Perciformes	Cichlidae	Neolamprologus	modestus		Neolamprologus_modestus	1	m	Mass	9.5	0.0761			Adult		Reddon AR et al. (2016) Can. J. Zool. 94: 1-6	Lake Tanganyika, Mpulungu, Zambia
Cichliformes	Perciformes	Cichlidae	Neolamprologus	modestus		Neolamprologus_modestus	1	m	Mass	9.05	0.0714			Adult		Reddon AR et al. (2016) Can. J. Zool. 94: 1-6	Lake Tanganyika, Mpulungu, Zambia
Cichliformes	Perciformes	Cichlidae	Neolamprologus	modestus		Neolamprologus_modestus	1	m	Mass	11.2	0.0747			Adult		Reddon AR et al. (2016) Can. J. Zool. 94: 1-6	Lake Tanganyika, Mpulungu, Zambia
Cichliformes	Perciformes	Cichlidae	Neolamprologus	modestus		Neolamprologus_modestus	1	m	Mass	12.65	0.0923			Adult		Reddon AR et al. (2016) Can. J. Zool. 94: 1-6	Lake Tanganyika, Mpulungu, Zambia
Cichliformes	Perciformes	Cichlidae	Neolamprologus	modestus		Neolamprologus_modestus	1	m	Mass	12.48	0.085			Adult		Reddon AR et al. (2016) Can. J. Zool. 94: 1-6	Lake Tanganyika, Mpulungu, Zambia
Cichliformes	Perciformes	Cichlidae	Neolamprologus	modestus		Neolamprologus_modestus	1	m	Mass	11.77	0.0875			Adult		Reddon AR et al. (2016) Can. J. Zool. 94: 1-6	Lake Tanganyika, Mpulungu, Zambia
Cichliformes	Perciformes	Cichlidae	Neolamprologus	multifasciatus		Neolamprologus_multifasciatus	1	m	Mass	0.53	0.0117			Adult		Reddon AR et al. (2016) Can. J. Zool. 94: 1-6	Lake Tanganyika, Mpulungu, Zambia
Cichliformes	Perciformes	Cichlidae	Neolamprologus	multifasciatus		Neolamprologus_multifasciatus	1	m	Mass	0.39	0.0087			Adult		Reddon AR et al. (2016) Can. J. Zool. 94: 1-6	Lake Tanganyika, Mpulungu, Zambia
Cichliformes	Perciformes	Cichlidae	Neolamprologus	multifasciatus		Neolamprologus_multifasciatus	1	m	Mass	0.43	0.0088			Adult		Reddon AR et al. (2016) Can. J. Zool. 94: 1-6	Lake Tanganyika, Mpulungu, Zambia
Cichliformes	Perciformes	Cichlidae	Neolamprologus	multifasciatus		Neolamprologus_multifasciatus	1	m	Mass	0.45	0.008			Adult		Reddon AR et al. (2016) Can. J. Zool. 94: 1-6	Lake Tanganyika, Mpulungu, Zambia
Cichliformes	Perciformes	Cichlidae	Neolamprologus	multifasciatus		Neolamprologus_multifasciatus	1	m	Mass	0.41	0.0081			Adult		Reddon AR et al. (2016) Can. J. Zool. 94: 1-6	Lake Tanganyika, Mpulungu, Zambia
Cichliformes	Perciformes	Cichlidae	Neolamprologus	multifasciatus		Neolamprologus_multifasciatus	1	m	Mass	0.35	0.0066			Adult		Reddon AR et al. (2016) Can. J. Zool. 94: 1-6	Lake Tanganyika, Mpulungu, Zambia
Cichliformes	Perciformes	Cichlidae	Neolamprologus	multifasciatus		Neolamprologus_multifasciatus	1	m	Mass	0.45	0.0091			Adult		Reddon AR et al. (2016) Can. J. Zool. 94: 1-6	Lake Tanganyika, Mpulungu, Zambia
Cichliformes	Perciformes	Cichlidae	Neolamprologus	multifasciatus		Neolamprologus_multifasciatus	1	m	Mass	0.5	0.0105			Adult		Reddon AR et al. (2016) Can. J. Zool. 94: 1-6	Lake Tanganyika, Mpulungu, Zambia
Cichliformes	Perciformes	Cichlidae	Neolamprologus	multifasciatus		Neolamprologus_multifasciatus	1	m	Mass	0.52	0.01			Adult		Reddon AR et al. (2016) Can. J. Zool. 94: 1-6	Lake Tanganyika, Mpulungu, Zambia
Cichliformes	Perciformes	Cichlidae	Neolamprologus	multifasciatus		Neolamprologus_multifasciatus	1	m	Mass	0.43	0.0092			Adult		Reddon AR et al. (2016) Can. J. Zool. 94: 1-6	Lake Tanganyika, Mpulungu, Zambia
Cichliformes	Perciformes	Cichlidae	Neolamprologus	pulcher		Neolamprologus_pulcher	1	f	Mass	0.67	0.0142			Adult		Fischer S et al. (2015) Am.Nat.186:123-140	2nd/3rd gen. from wild population at Kasakalawe popu;ation, Zambia
Cichliformes	Perciformes	Cichlidae	Neolamprologus	pulcher		Neolamprologus_pulcher	1	f	Mass	0.641	0.014			Adult		Fischer S et al. (2015) Am.Nat.186:123-140	2nd/3rd gen. from wild population at Kasakalawe popu;ation, Zambia
Cichliformes	Perciformes	Cichlidae	Neolamprologus	pulcher		Neolamprologus_pulcher	1	f	Mass	0.62	0.0133			Adult		Fischer S et al. (2015) Am.Nat.186:123-140	2nd/3rd gen. from wild population at Kasakalawe popu;ation, Zambia
Cichliformes	Perciformes	Cichlidae	Neolamprologus	pulcher		Neolamprologus_pulcher	1	f	Mass	0.795	0.0139			Adult		Fischer S et al. (2015) Am.Nat.186:123-140	2nd/3rd gen. from wild population at Kasakalawe popu;ation, Zambia
Cichliformes	Perciformes	Cichlidae	Neolamprologus	pulcher		Neolamprologus_pulcher	1	f	Mass	0.37	0.0098			Adult		Fischer S et al. (2015) Am.Nat.186:123-140	2nd/3rd gen. from wild population at Kasakalawe popu;ation, Zambia
Cichliformes	Perciformes	Cichlidae	Neolamprologus	pulcher		Neolamprologus_pulcher	1	f	Mass	0.7	0.0143			Adult		Fischer S et al. (2015) Am.Nat.186:123-140	2nd/3rd gen. from wild population at Kasakalawe popu;ation, Zambia
Cichliformes	Perciformes	Cichlidae	Neolamprologus	pulcher		Neolamprologus_pulcher	1	f	Mass	0.47	0.0119			Adult		Fischer S et al. (2015) Am.Nat.186:123-140	2nd/3rd gen. from wild population at Kasakalawe popu;ation, Zambia
Cichliformes	Perciformes	Cichlidae	Neolamprologus	pulcher		Neolamprologus_pulcher	1	f	Mass	0.74	0.0142			Adult		Fischer S et al. (2015) Am.Nat.186:123-140	2nd/3rd gen. from wild population at Kasakalawe popu;ation, Zambia
Cichliformes	Perciformes	Cichlidae	Neolamprologus	pulcher		Neolamprologus_pulcher	1	f	Mass	4.4	0.0366			Adult		Tsuboi M et al. (2015) Evolution 69:190-200	Lake Tanganyika, Mpulungu, Zambia
Cichliformes	Perciformes	Cichlidae	Neolamprologus	pulcher		Neolamprologus_pulcher	1	f	Mass	3.1	0.0272			Adult		Tsuboi M et al. (2015) Evolution 69:190-200	Lake Tanganyika, Mpulungu, Zambia
Cichliformes	Perciformes	Cichlidae	Neolamprologus	pulcher		Neolamprologus_pulcher	1	f	Mass	4.5	0.0294			Adult		Tsuboi M et al. (2015) Evolution 69:190-200	Lake Tanganyika, Mpulungu, Zambia
Cichliformes	Perciformes	Cichlidae	Neolamprologus	pulcher		Neolamprologus_pulcher	1	m	Mass	0.57	0.013			Adult		Fischer S et al. (2015) Am.Nat.186:123-140	2nd/3rd gen. from wild population at Kasakalawe popu;ation, Zambia
Cichliformes	Perciformes	Cichlidae	Neolamprologus	pulcher		Neolamprologus_pulcher	1	m	Mass	0.709	0.0142			Adult		Fischer S et al. (2015) Am.Nat.186:123-140	2nd/3rd gen. from wild population at Kasakalawe popu;ation, Zambia
Cichliformes	Perciformes	Cichlidae	Neolamprologus	pulcher		Neolamprologus_pulcher	1	m	Mass	0.6	0.0131			Adult		Fischer S et al. (2015) Am.Nat.186:123-140	2nd/3rd gen. from wild population at Kasakalawe popu;ation, Zambia
Cichliformes	Perciformes	Cichlidae	Neolamprologus	pulcher		Neolamprologus_pulcher	1	m	Mass	1.1	0.0184			Adult		Fischer S et al. (2015) Am.Nat.186:123-140	2nd/3rd gen. from wild population at Kasakalawe popu;ation, Zambia
Cichliformes	Perciformes	Cichlidae	Neolamprologus	pulcher		Neolamprologus_pulcher	1	m	Mass	4.75	0.038			Adult		Reddon AR et al. (2016) Can. J. Zool. 94: 1-6	Lake Tanganyika, Mpulungu, Zambia
Cichliformes	Perciformes	Cichlidae	Neolamprologus	pulcher		Neolamprologus_pulcher	1	m	Mass	3.92	0.0306			Adult		Reddon AR et al. (2016) Can. J. Zool. 94: 1-6	Lake Tanganyika, Mpulungu, Zambia
Cichliformes	Perciformes	Cichlidae	Neolamprologus	pulcher		Neolamprologus_pulcher	1	m	Mass	5.25	0.0382			Adult		Reddon AR et al. (2016) Can. J. Zool. 94: 1-6	Lake Tanganyika, Mpulungu, Zambia
Cichliformes	Perciformes	Cichlidae	Neolamprologus	pulcher		Neolamprologus_pulcher	1	m	Mass	3.98	0.0345			Adult		Reddon AR et al. (2016) Can. J. Zool. 94: 1-6	Lake Tanganyika, Mpulungu, Zambia
Cichliformes	Perciformes	Cichlidae	Neolamprologus	pulcher		Neolamprologus_pulcher	1	m	Mass	4.46	0.0348			Adult		Reddon AR et al. (2016) Can. J. Zool. 94: 1-6	Lake Tanganyika, Mpulungu, Zambia
Cichliformes	Perciformes	Cichlidae	Neolamprologus	pulcher		Neolamprologus_pulcher	1	m	Mass	3.28	0.0312			Adult		Reddon AR et al. (2016) Can. J. Zool. 94: 1-6	Lake Tanganyika, Mpulungu, Zambia
Cichliformes	Perciformes	Cichlidae	Neolamprologus	pulcher		Neolamprologus_pulcher	1	m	Mass	2.8	0.0324			Adult		Reddon AR et al. (2016) Can. J. Zool. 94: 1-6	Lake Tanganyika, Mpulungu, Zambia
Cichliformes	Perciformes	Cichlidae	Neolamprologus	pulcher		Neolamprologus_pulcher	1	m	Mass	3.01	0.0304			Adult		Reddon AR et al. (2016) Can. J. Zool. 94: 1-6	Lake Tanganyika, Mpulungu, Zambia
Cichliformes	Perciformes	Cichlidae	Neolamprologus	pulcher		Neolamprologus_pulcher	1	m	Mass	4.92	0.036			Adult		Reddon AR et al. (2016) Can. J. Zool. 94: 1-6	Lake Tanganyika, Mpulungu, Zambia
Cichliformes	Perciformes	Cichlidae	Neolamprologus	pulcher		Neolamprologus_pulcher	1	m	Mass	4.82	0.0374			Adult		Reddon AR et al. (2016) Can. J. Zool. 94: 1-6	Lake Tanganyika, Mpulungu, Zambia
Cichliformes	Perciformes	Cichlidae	Neolamprologus	pulcher		Neolamprologus_pulcher	1	m	Mass	6.4	0.0461			Adult		Tsuboi M et al. (2015) Evolution 69:190-200	Lake Tanganyika, Mpulungu, Zambia
Cichliformes	Perciformes	Cichlidae	Neolamprologus	pulcher		Neolamprologus_pulcher	1	m	Mass	7.3	0.0346			Adult		Tsuboi M et al. (2015) Evolution 69:190-200	Lake Tanganyika, Mpulungu, Zambia
Cichliformes	Perciformes	Cichlidae	Neolamprologus	pulcher		Neolamprologus_pulcher	1	m	Mass	6.8	0.0402			Adult		Tsuboi M et al. (2015) Evolution 69:190-200	Lake Tanganyika, Mpulungu, Zambia
Cichliformes	Perciformes	Cichlidae	Neolamprologus	pulcher		Neolamprologus_pulcher	1	m	Mass	6.8	0.034			Adult		Tsuboi M et al. (2015) Evolution 69:190-200	Lake Tanganyika, Mpulungu, Zambia
Cichliformes	Perciformes	Cichlidae	Neolamprologus	pulcher		Neolamprologus_pulcher	1	m	Mass	7	0.0379			Adult		Tsuboi M et al. (2015) Evolution 69:190-200	Lake Tanganyika, Mpulungu, Zambia
Cichliformes	Perciformes	Cichlidae	Neolamprologus	pulcher		Neolamprologus_pulcher	1	m	Mass	6.1	0.0348			Adult		Tsuboi M et al. (2015) Evolution 69:190-200	Lake Tanganyika, Mpulungu, Zambia
Cichliformes	Perciformes	Cichlidae	Neolamprologus	pulcher		Neolamprologus_pulcher	1	m	Mass	5.9	0.0375			Adult		Tsuboi M et al. (2015) Evolution 69:190-200	Lake Tanganyika, Mpulungu, Zambia
Cichliformes	Perciformes	Cichlidae	Neolamprologus	pulcher		Neolamprologus_pulcher	1	m	Mass	5.9	0.0367			Adult		Tsuboi M et al. (2015) Evolution 69:190-200	Lake Tanganyika, Mpulungu, Zambia
Cichliformes	Perciformes	Cichlidae	Neolamprologus	pulcher		Neolamprologus_pulcher	1	m	Mass	4.7	0.0294			Adult		Tsuboi M et al. (2015) Evolution 69:190-200	Lake Tanganyika, Mpulungu, Zambia
Cichliformes	Perciformes	Cichlidae	Neolamprologus	pulcher		Neolamprologus_pulcher	1	m	Mass	5.7	0.0319			Adult		Tsuboi M et al. (2015) Evolution 69:190-200	Lake Tanganyika, Mpulungu, Zambia
Cichliformes	Perciformes	Cichlidae	Neolamprologus	pulcher		Neolamprologus_pulcher	1	m	Mass	6.4	0.0369			Adult		Tsuboi M et al. (2015) Evolution 69:190-200	Lake Tanganyika, Mpulungu, Zambia
Cichliformes	Perciformes	Cichlidae	Neolamprologus	pulcher		Neolamprologus_pulcher	1	unknown	Mass	0.21	0.008			Adult		Fischer S et al. (2015) Am.Nat.186:123-140	2nd/3rd gen. from wild population at Kasakalawe popu;ation, Zambia
Cichliformes	Perciformes	Cichlidae	Neolamprologus	pulcher		Neolamprologus_pulcher	1	unknown	Mass	0.9152	0.0152			Adult		Fischer S et al. (2015) Am.Nat.186:123-140	2nd/3rd gen. from wild population at Kasakalawe popu;ation, Zambia
Cichliformes	Perciformes	Cichlidae	Neolamprologus	pulcher		Neolamprologus_pulcher	1	unknown	Mass	0.7216	0.0139			Adult		Fischer S et al. (2015) Am.Nat.186:123-140	2nd/3rd gen. from wild population at Kasakalawe popu;ation, Zambia
Cichliformes	Perciformes	Cichlidae	Neolamprologus	pulcher		Neolamprologus_pulcher	1	unknown	Mass	0.44	0.0116			Adult		Fischer S et al. (2015) Am.Nat.186:123-140	2nd/3rd gen. from wild population at Kasakalawe popu;ation, Zambia
Cichliformes	Perciformes	Cichlidae	Neolamprologus	pulcher		Neolamprologus_pulcher	1	unknown	Mass	0.36	0.0099			Adult		Fischer S et al. (2015) Am.Nat.186:123-140	2nd/3rd gen. from wild population at Kasakalawe popu;ation, Zambia
Cichliformes	Perciformes	Cichlidae	Neolamprologus	pulcher		Neolamprologus_pulcher	1	unknown	Mass	0.728	0.0149			Adult		Fischer S et al. (2015) Am.Nat.186:123-140	2nd/3rd gen. from wild population at Kasakalawe popu;ation, Zambia
Cichliformes	Perciformes	Cichlidae	Neolamprologus	pulcher		Neolamprologus_pulcher	1	unknown	Mass	0.525	0.0141			Adult		Fischer S et al. (2015) Am.Nat.186:123-140	2nd/3rd gen. from wild population at Kasakalawe popu;ation, Zambia
Cichliformes	Perciformes	Cichlidae	Neolamprologus	pulcher		Neolamprologus_pulcher	1	unknown	Mass	0.28	0.0108			Adult		Fischer S et al. (2015) Am.Nat.186:123-140	2nd/3rd gen. from wild population at Kasakalawe popu;ation, Zambia
Cichliformes	Perciformes	Cichlidae	Neolamprologus	pulcher		Neolamprologus_pulcher	1	unknown	Mass	0.226	0.0075			Adult		Fischer S et al. (2015) Am.Nat.186:123-140	2nd/3rd gen. from wild population at Kasakalawe popu;ation, Zambia
Cichliformes	Perciformes	Cichlidae	Neolamprologus	pulcher		Neolamprologus_pulcher	1	unknown	Mass	1.3015	0.0188			Adult		Fischer S et al. (2015) Am.Nat.186:123-140	2nd/3rd gen. from wild population at Kasakalawe popu;ation, Zambia
Cichliformes	Perciformes	Cichlidae	Neolamprologus	pulcher		Neolamprologus_pulcher	1	unknown	Mass	0.3955	0.0105			Adult		Fischer S et al. (2015) Am.Nat.186:123-140	2nd/3rd gen. from wild population at Kasakalawe popu;ation, Zambia
Cichliformes	Perciformes	Cichlidae	Neolamprologus	savoryi		Neolamprologus_savoryi	1	m	Mass	4.37	0.033			Adult		Reddon AR et al. (2016) Can. J. Zool. 94: 1-6	Lake Tanganyika, Mpulungu, Zambia
Cichliformes	Perciformes	Cichlidae	Neolamprologus	savoryi		Neolamprologus_savoryi	1	m	Mass	4.91	0.0436			Adult		Reddon AR et al. (2016) Can. J. Zool. 94: 1-6	Lake Tanganyika, Mpulungu, Zambia
Cichliformes	Perciformes	Cichlidae	Neolamprologus	savoryi		Neolamprologus_savoryi	1	m	Mass	3.2	0.0322			Adult		Reddon AR et al. (2016) Can. J. Zool. 94: 1-6	Lake Tanganyika, Mpulungu, Zambia
Cichliformes	Perciformes	Cichlidae	Neolamprologus	savoryi		Neolamprologus_savoryi	1	m	Mass	4.4	0.0423			Adult		Reddon AR et al. (2016) Can. J. Zool. 94: 1-6	Lake Tanganyika, Mpulungu, Zambia
Cichliformes	Perciformes	Cichlidae	Neolamprologus	savoryi		Neolamprologus_savoryi	1	m	Mass	4.55	0.0318			Adult		Reddon AR et al. (2016) Can. J. Zool. 94: 1-6	Lake Tanganyika, Mpulungu, Zambia
Cichliformes	Perciformes	Cichlidae	Neolamprologus	savoryi		Neolamprologus_savoryi	1	m	Mass	4.28	0.0399			Adult		Reddon AR et al. (2016) Can. J. Zool. 94: 1-6	Lake Tanganyika, Mpulungu, Zambia
[truncated: 2,195 more rows]
