# Supplementary material for: Convergent mosaic brain evolution is associated with the evolution of novel electrosensory systems in teleost fishes
Source: eLife journal article supplement (doi:10.7554/elife.74159), 2022-06-17
Supplement: supp [file elife-74159-supp-v1.zip › elife_poa_e74159_Supplementary_file_3.xlsx]

## Sheet: Sheet1
Silhouette	Credit	Link to license
Acanthuriformes	Nick Schooler (phylopic.org)
Acipenseriformes	Duane Raver/USFWS (phylopic.org)
Amiiformes	Duane Raver, vectorized by T. Michael Keesey (phylopic.org)
Ammodytidae	Uncredited (phylopic.org)
Anguilliformes	Steven Traver (phylopic.org)
Argentiniformes	Uncredited (phylopic.org)
Atheriniformes	Lily Hughes (phylopic.org)
Beloniformes	Uncredited (phylopic.org)
Blenniformes	Richard J. Harris (phylopic.org)
Carangidae	Lily Hughes (phylopic.org)
Centrarchidae	Sherman Foote Denton (illustration, 1897) and Timothy J. Bartley (silhouette) (phylopic.org)	http://creativecommons.org/licenses/by-sa/3.0/ Colors were changed from original silhouette
Chaetodontidae	Uncredited (phylopic.org)
Characiformes	Ingo Braasch (phylopic.org)
Clupeiformes	xgirouxb (phylopic.org)
Cyclopteridae	Franklin, Dwight (1910) (phylopic.org)
Cypriniformes	Tyler McCraney (phylopic.org)
Cyprinodontiformes	Ryan Cupo (phylopic.org)
Esociformes	U.S. Fish and Wildlife Service (illustration) and Timothy J. Bartley (silhouette) (phylopic.org)	http://creativecommons.org/licenses/by-sa/3.0/ Colors were changed from original silhouette
Fistularidae	Francis de Laporte de Castelnau, vectorized by T. Michael Keesey (phylopic.org)
Gadiformes	C. Camilo Julián-Caballero (phylopic.org)	http://creativecommons.org/licenses/by/3.0/ Colors were changed from original silhouette
Galaxiiformes	Lily Hughes (phylopic.org)
Gasterosteiformes	Milton Tan (phylopic.org)	http://creativecommons.org/licenses/by-nc-sa/3.0/ Colors were changed from original silhouette
Gerreidae	Uncredited (phylopic.org)
Gobiesociformes	Richard J. Harris (phylopic.org)
Gobiiformes	Uncredited (phylopic.org)
Gymnotiformes	Uncredited (phylopic.org)
Holocentriformes	Uncredited (phylopic.org)
Kurtiformes	Uncredited (phylopic.org)
Labriformes	Ieuan Jones (phylopic.org)
Lampriformes	Uncredited (phylopic.org)
Lepidogalaxiiformes	Darren Naish, vectorized by T. Michael Keesey (phylopic.org)	http://creativecommons.org/licenses/by/3.0/ Colors were changed from original silhouette
Lepisosteiformes	Milton Tan (phylopic.org)	http://creativecommons.org/licenses/by-nc-sa/3.0/ Colors were changed from original silhouette
Lophiiformes	Maija Karala (phylopic.org)	http://creativecommons.org/licenses/by-nc-sa/3.0/ Colors were changed from original silhouette
Lutjanidae	Uncredited (phylopic.org)
Mugiliformes	Lafage (phylopic.org)	http://creativecommons.org/licenses/by/3.0/ Colors were changed from original silhouette
Myctophiformes	Emma Kissling (phylopic.org)
Nototheniidae	Lily Hughes (phylopic.org)
Osmeriformes	xgirouxb (phylopic.org)
Osteoglossiformes	Maija Karala (phylopic.org)	http://creativecommons.org/licenses/by-nc-sa/3.0/ Colors were changed from original silhouette
Percomorphaceae/ Cichliformes	Milton Tan (phylopic.org)	http://creativecommons.org/licenses/by-nc-sa/3.0/ Colors were changed from original silhouette
Percopsiformes	Ellen Edmonson and Hugh Chrisp, vectorized by T. Michael Keesey (phylopic.org)
Polymixiiformes	Uncredited (phylopic.org)
Polypteriformes	Maija Karala (phylopic.org)	http://creativecommons.org/licenses/by-nc-sa/3.0/ Colors were changed from original silhouette
Pomacanthidae	Lily Hughes (phylopic.org)
Pomacentriidae	Diana Pomeroy (phylopic.org)	http://creativecommons.org/licenses/by-nc-sa/3.0/ Colors were changed from original silhouette
Salmoniformes	Xavier Giroux-Bougard
Scatophagidae	Richard J. Harris (phylopic.org)
Scombridae	Felix Vaux (phylopic.org)
Sebastidae	Harold N Eyster (phylopic.org)	http://creativecommons.org/licenses/by/3.0/ Colors were changed from original silhouette
Serranidae	Margot Michaud (phylopic.org)
Siganidae	Richard J. Harris (phylopic.org)
Siluriformes	T. Michael Keesey (vector) and Stuart Halliday (photograph) (phylopic.org)
Stomiatiformes	Yan Wong (phylopic.org)
Synanceiidae	Richard J. Harris (phylopic.org)
Syngnathidae	Uncredited (phylopic.org)
Tetraodoniformes	Lily Hughes (phylopic.org)
Trachinidae	Richard J. Harris (phylopic.org)
Xiphiidae	Felix Vaux (phylopic.org)
Zeiformes	Tony Ayling, vectorized by T. Michael Keesey (phylopic.org)	http://creativecommons.org/licenses/by-sa/3.0/ Colors were changed from original silhouette
