# Supplementary figures and images for: Convergent mosaic brain evolution is associated with the evolution of novel electrosensory systems in teleost fishes
Source: eLife journal article supplement (doi:10.7554/elife.74159), 2022-06-17

**A** *Synodontis ocellifer*

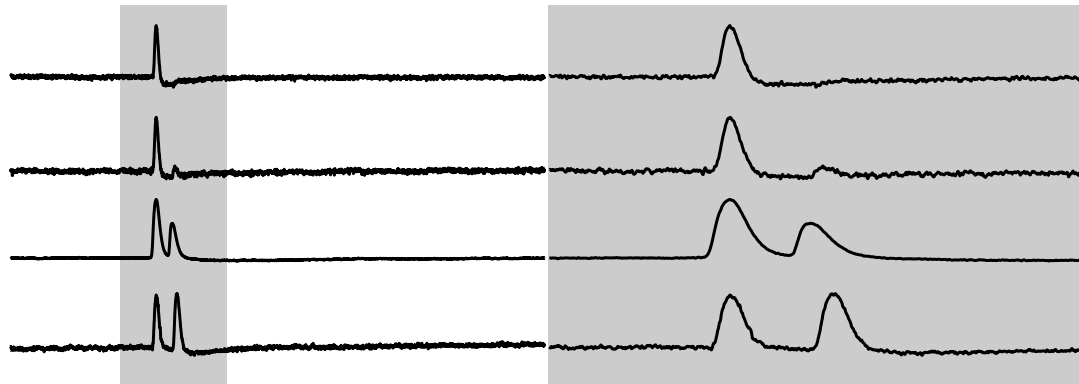

**B** *Synodontis soloni*

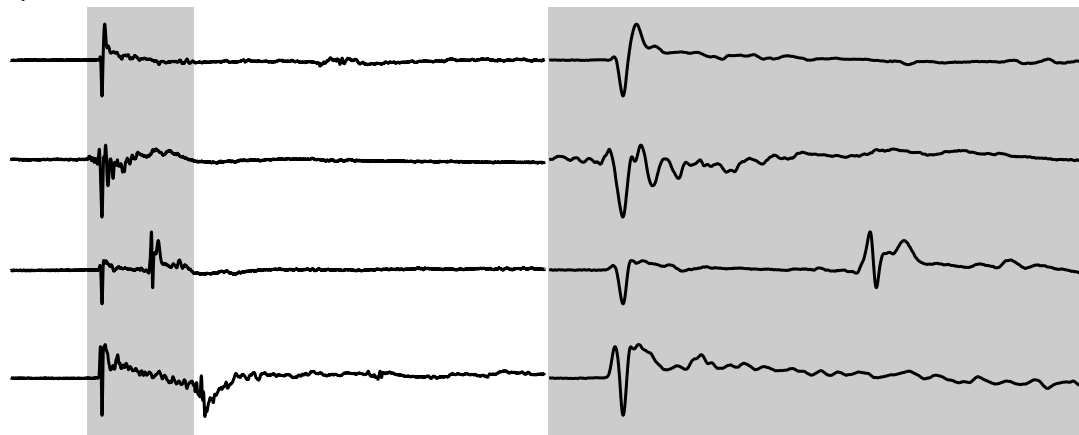

**C** *Synodontis multipunctatus*

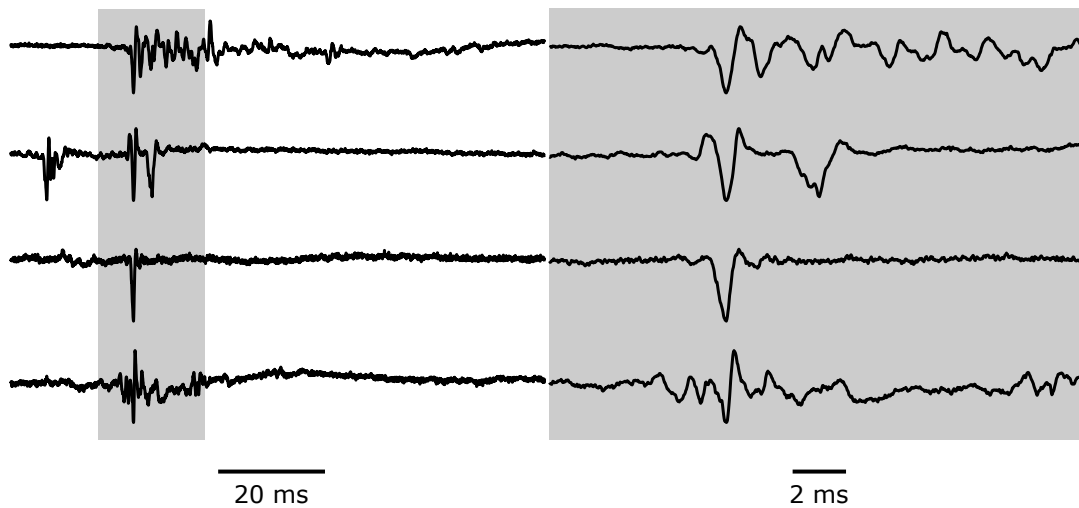

Supplement: supp [file elife-74159-supp-v1.zip]

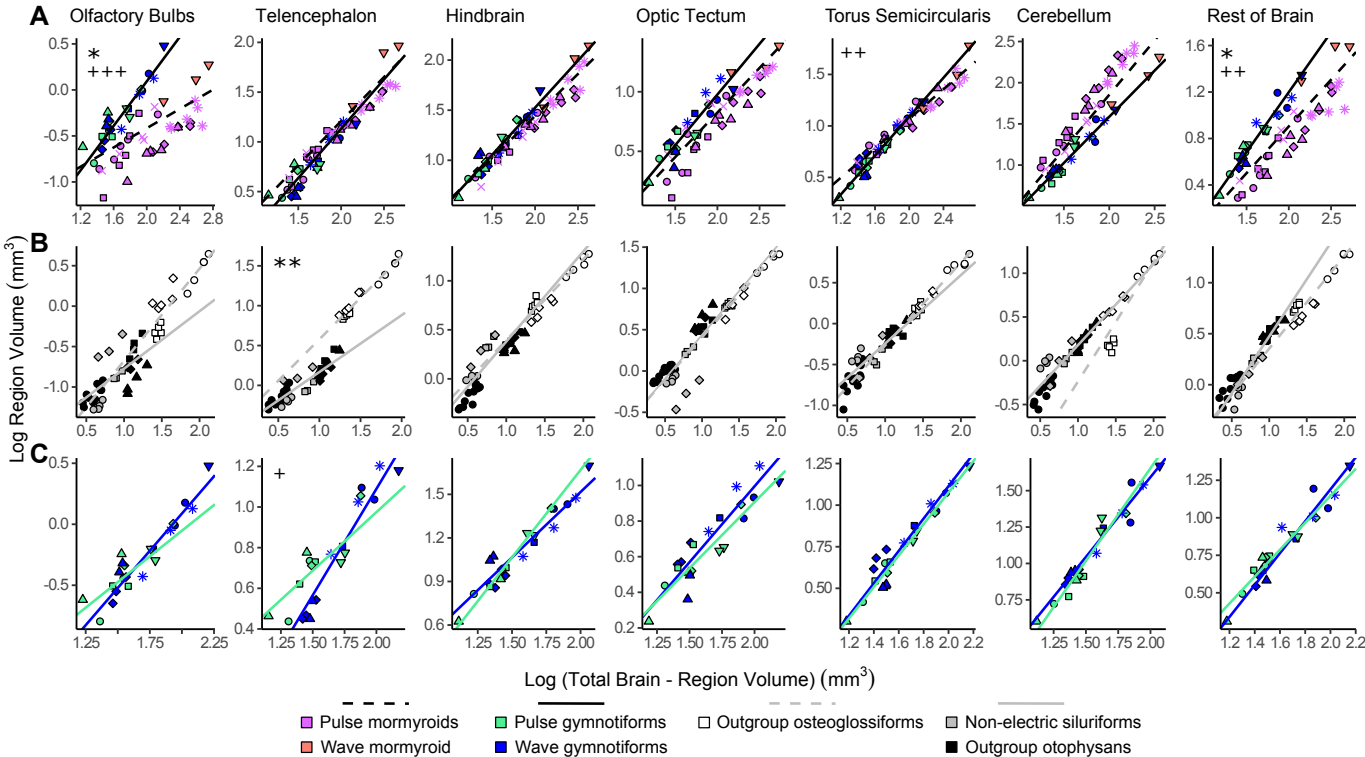

Supplement: supp [file elife-74159-supp-v1.zip]

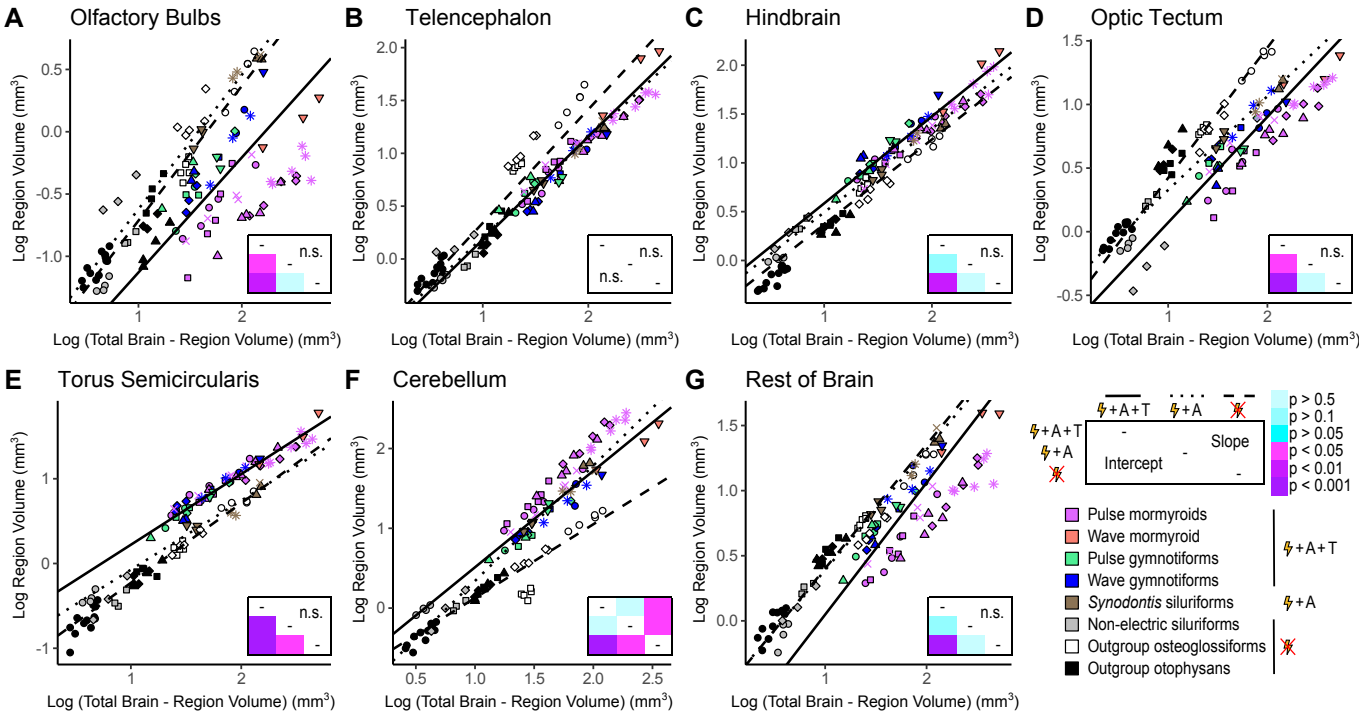

Supplement: supp [file elife-74159-supp-v1.zip › elife_poa_e74159_Figure_5_figure_supplement_1.pdf]

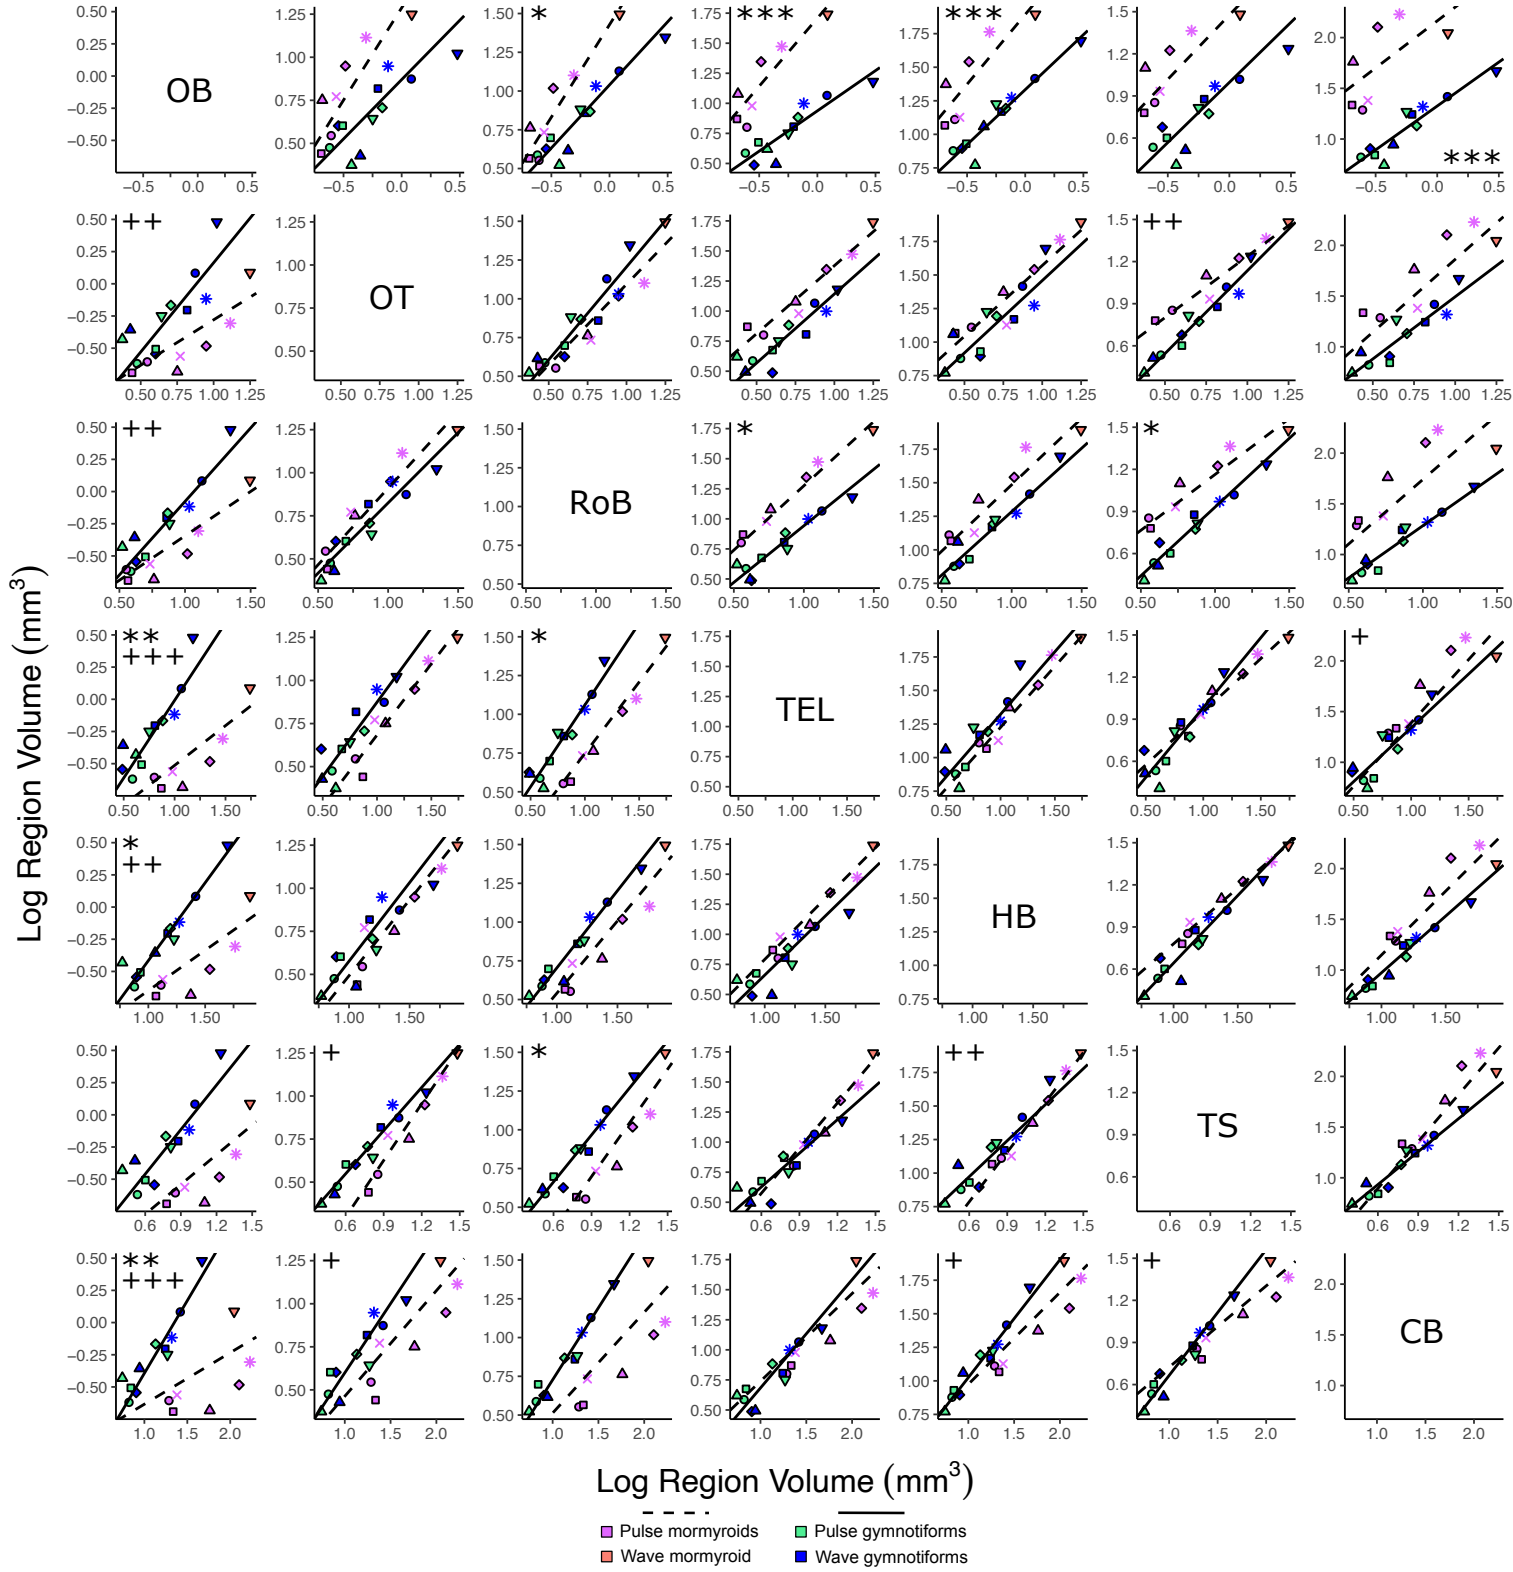

Supplement: supp [file elife-74159-supp-v1.zip › elife_poa_e74159_Figure_7_figure_supplement_2.pdf]

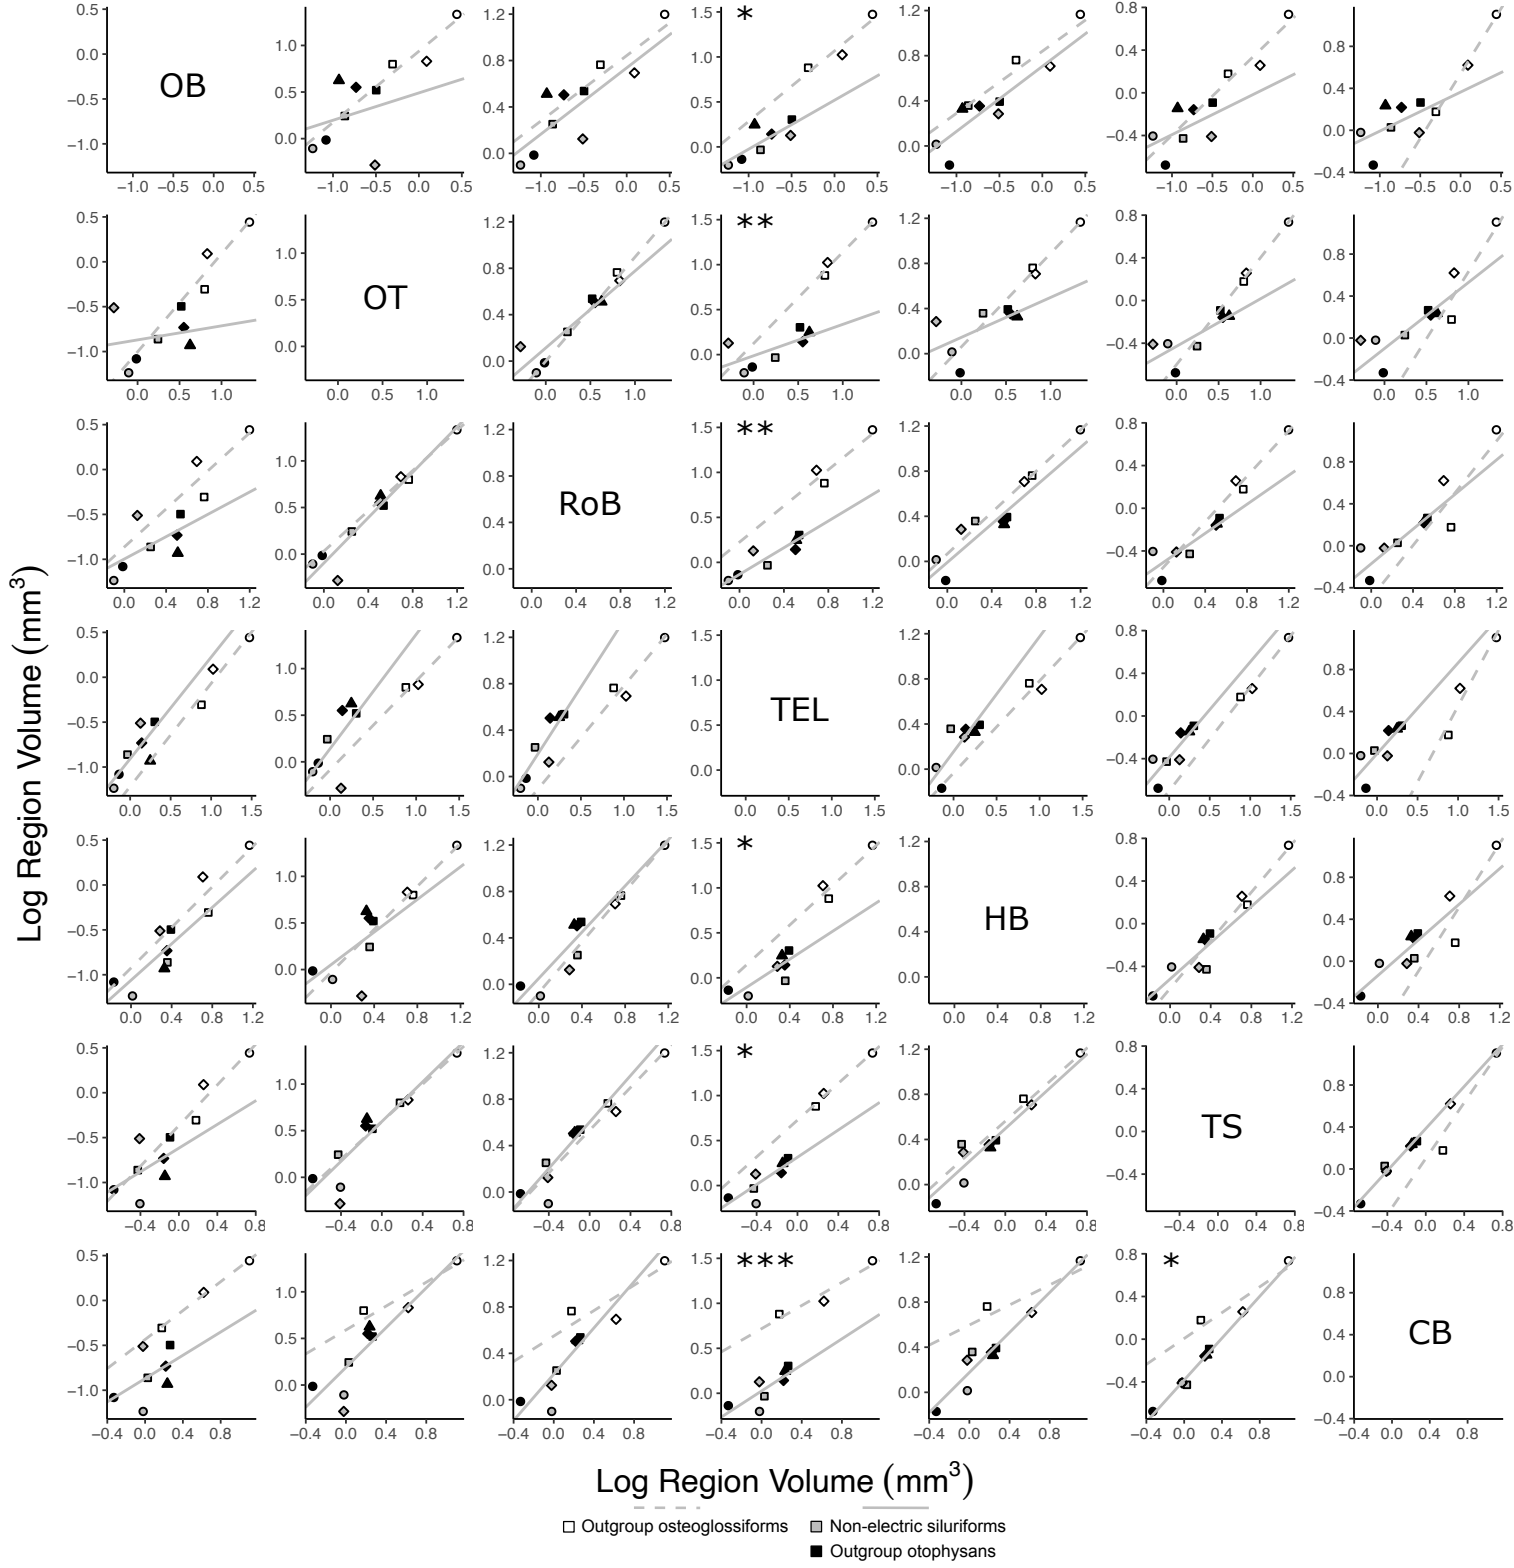

Supplement: supp [file elife-74159-supp-v1.zip › elife_poa_e74159_Figure_7_figure_supplement_3.pdf]

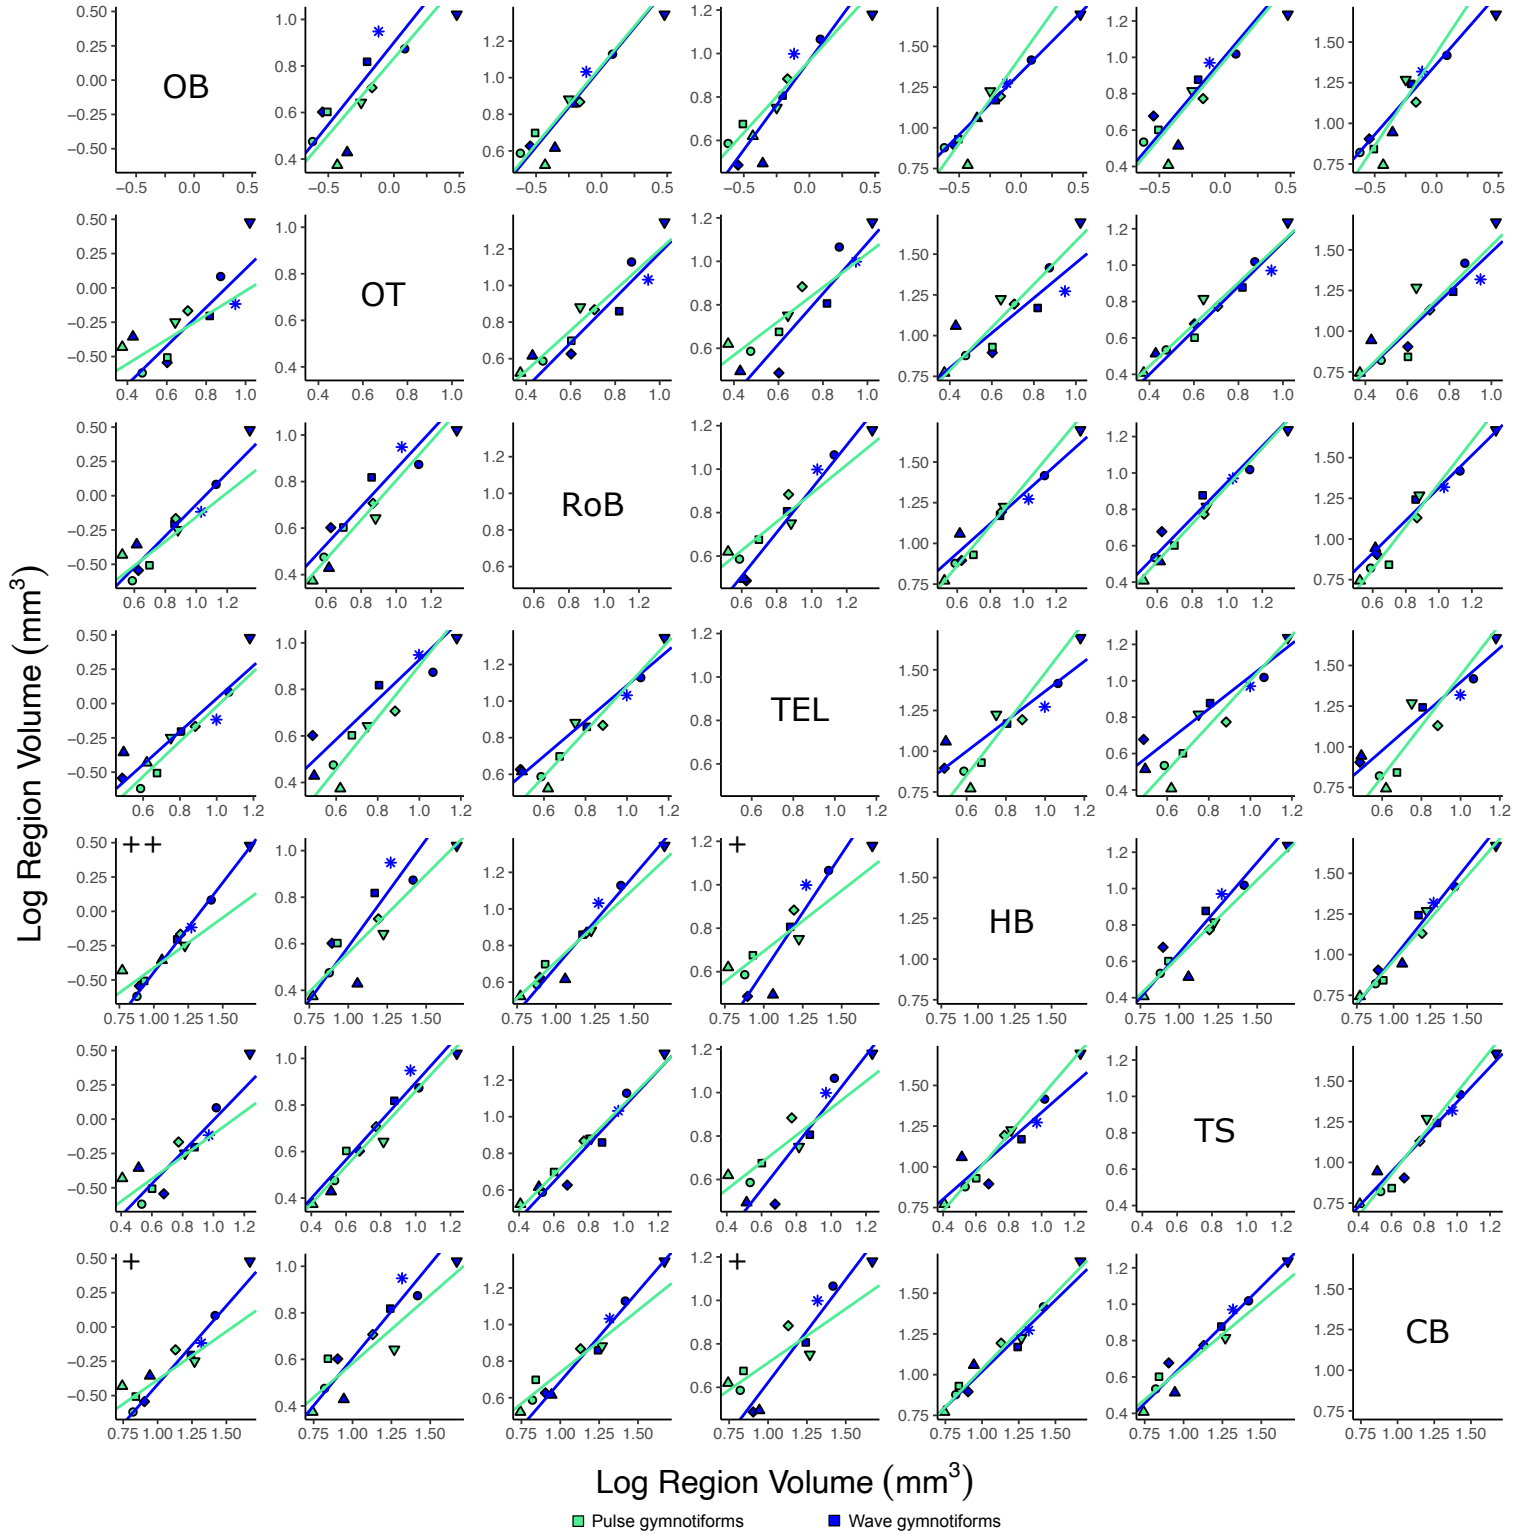

Supplement: supp [file elife-74159-supp-v1.zip › elife_poa_e74159_Figure_7_figure_supplement_4.pdf]
